# Supplementary material for: Skeletal Muscle Mitochondrial Functions, Mitochondrial DNA Copy Numbers, and Gene Transcript Profiles in Type 2 Diabetic and Nondiabetic Subjects at Equal Levels of Low or High Insulin and Euglycemia
Source: Oxford University Press journal article supplement (doi:10.2337/db05-1230), 2006-11-28
Supplement: pg3309suppl1.xls [file pg3309suppl1.xls]

## Sheet: effect-highIns
probe set	T2D-lowIns	ND-lowIns	T2D/ND -lowIns	p values (T-test, lowIns)	empirical p-Values( ND vs T2D, 1000 permutations of subject labels)	T2D-highIns	ND-highIns	ND/T2D-highIns	p values (t-test) (highIns)	HighIns Normalized	Symbol	ACC	full Name
121_at	1908.12	1768.86	1.07873	0.0161027	0.02	1929.8	1783.9	0.9244	0.0144894		PAX8	X69699	paired box gene 8
1552271_at	724.758	568.311	1.27528	0.00509133	0.047	655.578	572.772	0.87369	0.0752487	#	MGC24975	NM_153359	hypothetical protein MGC24975
1552276_a_at	639.795	566.116	1.13015	0.0270349	0.045	624.962	569.119	0.910647	0.0659573	#	VPS18	NM_080432	vacuolar protein sorting protein 18
1552279_a_at	613.972	549.958	1.1164	0.0099788	0.031	594.121	530.005	0.892082	0.000907556		MGC9564	AK074161	similar to RIKEN cDNA 1110002C08 gene
1552344_s_at	405.063	446.014	0.908184	0.0466002	0.019	388.529	434.927	1.11942	0.0193462		CNOT7	NM_054026	CCR4-NOT transcription complex, subunit 7
1552432_at	583.162	538.004	1.08394	0.0415031	0.046	572.144	553.134	0.966774	0.360592	#	FLJ35773	BC040487	hypothetical protein FLJ35773
1552473_at	1223.5	1126.93	1.08569	0.0123315	0.067	1176.38	1099.91	0.935003	0.0165334		GAMT	NM_138924	guanidinoacetate N-methyltransferase
1552554_a_at	303.964	547.988	0.554691	0.0197805	0.061	357.702	532.167	1.48774	0.087471	#	CARD12	AY027790	caspase recruitment domain family, member 12
1552620_at	1001.88	829.019	1.20851	0.0195472	0.03	832.856	802.631	0.96371	0.429419	#	SPRR4	NM_173080	small proline rich protein 4
1552732_at	1358.56	1615.65	0.840874	0.039092	0.007	1429.96	1638.11	1.14557	0.165546	#	---	AL832152	---
1552868_at	454.551	417.994	1.08746	0.0214262	0.036	446.533	404.405	0.905657	0.013887		C19orf23	NM_152480	chromosome 19 open reading frame 23
1552935_at	330.48	480.034	0.688452	0.0292385	0.044	381.877	492.252	1.28903	0.136845	#	ZCCHC5	NM_152694	zinc finger, CCHC domain containing 5
1553045_at	349.233	326.695	1.06899	0.00843559	0.039	350.206	341.463	0.975033	0.480344	#	WNT9A	NM_003395	wingless-type MMTV integration site family, member 9A
1553064_at	317.87	295.883	1.07431	0.031641	0.027	311.756	293.018	0.939896	0.0942086	#	H1FOO	NM_153833	H1 histone family, member O, oocyte-specific
1553232_at	349.847	298.527	1.17191	0.0429977	0.043	348.776	284.062	0.814454	6.54349e-05		FLJ32954	NM_144713	hypothetical protein FLJ32954
1553262_a_at	1111.71	965.865	1.151	0.00901539	0.054	1079.31	974.961	0.903323	0.014594		UTS2R	NM_018949	urotensin 2 receptor
1553403_at	384.012	337.052	1.13933	0.0199268	0.039	390.848	338.872	0.867017	0.006244		RLN3	AB076563	relaxin 3 (H3)
1553514_a_at	334.011	561.82	0.594516	0.0214388	0.058	389.786	548.784	1.40791	0.0764437	#	VNN3	NM_078625	vanin 3
1553566_at	773.513	683.239	1.13213	0.0499356	0.049	736.723	719	0.975944	0.545049	#	DKFZp547D2210	NM_153685	hypothetical protein DKFZp547D2210
1553575_at	444.983	380.874	1.16832	0.0163644	0.06	416.884	379.747	0.910917	0.0915625	#	---	NM_173714	---
1553581_s_at	724.378	649.222	1.11576	0.0204227	0.016	678.274	626.764	0.924057	0.0803038	#	FLJ36754	NM_173829	hypothetical protein FLJ36754
1553677_a_at	408.955	533.549	0.766481	0.0386376	0.032	432.302	528.919	1.22349	0.110433	#	MGC3794	NM_152902	putative MAPK activating protein
1553755_at	388.213	350.742	1.10683	0.0194511	0.038	377.789	358.848	0.949863	0.177422	#	TXNL6	NM_138454	thioredoxin-like 6
1553872_at	357.231	335.314	1.06536	0.0411483	0.024	358.918	327.188	0.911594	0.00774403		DKFZp762H185	NM_152914	hypothetical protein DKFZp762H185
1553888_at	268.668	418.061	0.642654	0.0208998	0.042	299.531	414.316	1.38321	0.0746625	#	LDHAL6A	NM_144972	lactate dehydrogenase A-like 6A
1553978_at	312.655	295.23	1.05902	0.0248955	0.009	313.687	293.073	0.934285	0.0648896	#	MEF2B	BC010931	MADS box transcription enhancer factor 2, polypeptide B (myocyte enhancer factor 2B)
1554006_a_at	539.015	478.804	1.12575	0.0193194	0.067	515.662	491.602	0.953342	0.0334089		LLGL2	BC006503	lethal giant larvae homolog 2 (Drosophila)
1554149_at	398.841	437.224	0.912212	0.0320225	0.063	411.38	452.127	1.09905	0.065504	#	C3orf4	BC013610	chromosome 3 open reading frame 4
1554167_a_at	371.903	391.774	0.949279	0.0414647	0.056	397.159	403.077	1.0149	0.673995	#	GOLGA7	BC012032	golgi autoantigen, golgin subfamily a, 7
1554188_at	314.137	286.409	1.09681	0.0401086	0.019	314.118	276.477	0.880169	0.0133996		MGC50104	BC039669	Similar to RIKEN cDNA 1810046K07 gene
1554237_at	331.666	631.787	0.524966	0.0112225	0.062	383.323	616.374	1.60797	0.0518589	#	SDCCAG8	BC032454	serologically defined colon cancer antigen 8
1554374_at	343.444	300.328	1.14356	0.0229659	0.045	350.113	280.466	0.801074	0.00447021		---	BC029062	---
1554414_a_at	657.668	547.896	1.20035	0.00831097	0.093	645.759	514.341	0.796492	0.00945296		C8orf1	BC031054	chromosome 8 open reading frame 1
1554479_a_at	280.514	330.692	0.848263	0.00569187	0.06	286.329	344.081	1.2017	0.000944281		CARD8	AF511652	caspase recruitment domain family, member 8
1554542_at	647.812	587.053	1.1035	0.0120446	0.029	636.675	611.911	0.961104	0.24608	#	LOC153328	BC025747	similar to CG4995 gene product
1554602_at	277.629	390.581	0.71081	0.0499189	0.058	315.115	402.892	1.27856	0.100363	#	RBM8A	BC017770	RNA binding motif protein 8A
1554648_a_at	433.902	391.601	1.10802	0.0417293	0.046	436.668	385.786	0.883475	0.029191		NIP	BC020841	homolog of Drosophila Numb-interacting protein
1554657_a_at	322.089	282.467	1.14027	0.00723161	0.018	311.709	272.097	0.872923	0.0674482	#	C20orf26	BC031674	chromosome 20 open reading frame 26
1554857_at	317.861	293.232	1.08399	0.0483599	0.046	304.82	290.295	0.952349	0.0458206		ELMO2	BC014207	engulfment and cell motility 2 (ced-12 homolog, C. elegans)
1554937_x_at	409.078	375.88	1.08832	0.0138161	0.032	400.859	360.396	0.89906	0.0125447		LOC283849	BC034287	hypothetical protein LOC283849
1555044_a_at	906.561	1060.85	0.85456	0.0103037	0.076	1094.66	1119.94	1.02309	0.822795	#	KBTBD5	AY176040	kelch repeat and BTB (POZ) domain containing 5
1555131_a_at	537.524	807.995	0.665256	0.0259722	0.059	585.242	819.318	1.39997	0.0388399		PER3	BC026102	period homolog 3 (Drosophila)
1555231_a_at	614.098	543.175	1.13057	0.0250585	0.057	586.314	547.503	0.933804	0.0164177		C21orf88	AF426267	chromosome 21 open reading frame 88
1555675_at	317.586	283.041	1.12205	0.0458675	0.05	306.836	267.394	0.871455	0.151562	#	BRCC2	AF303179	BRCC2 mRNA
1555743_s_at	1057.04	961.024	1.09991	0.0279348	0.004	1103.26	949.514	0.860645	0.000241758		---	U92816	---
1555790_a_at	357.203	415.755	0.859167	0.0163664	0.043	343.574	376.615	1.09617	0.0216927		FLJ38482 /// LOC162967	BC036301	hypothetical protein FLJ38482 /// hypothetical protein LOC162967
1555833_a_at	644.474	594.99	1.08317	0.0200462	0.149	614.805	589.45	0.958758	0.299449	#	---	AK096168	Similar to FKSG27
1555902_at	450.115	382.991	1.17526	0.0454006	0.046	409.833	366.577	0.894456	0.0927248	#	ARMCX5	BC022066	armadillo repeat containing, X-linked 5
1555910_at	360.057	394.359	0.91302	0.00711809	0.046	339.669	404.017	1.18944	4.26098e-05		PTCD2	AK056761	pentatricopeptide repeat domain 2
1555933_at	684.675	825.963	0.828942	0.0419543	0	697.985	790.668	1.13279	0.12833	#	MGC33867	AB095933	hypothetical protein MGC33867
1555948_s_at	715.499	842.944	0.848809	0.00116602	0	774.078	848.603	1.09628	0.0440371		C9orf10	AU116818	chromosome 9 open reading frame 10
1555950_a_at	619.647	687.666	0.901087	0.0488425	0	627.907	669.285	1.0659	0.249985	#	DAF	CA448665	decay accelerating factor for complement (CD55, Cromer blood group system)
1556014_at	335.914	306.559	1.09576	0.02526	0.014	320.957	309.291	0.963654	0.467007	#	MESP2	AL360139	mesoderm posterior 2
1556186_s_at	741.835	642.219	1.15511	0.0117776	0.04	705.657	637.357	0.903212	0.0363944		KIAA0090	AW026427	KIAA0090 protein
1556247_a_at	326.612	291.235	1.12147	0.0159222	0.058	321.319	281.543	0.87621	0.00131039		---	BC043218	CDNA FLJ40468 fis, clone TESTI2042400
1556248_at	950.137	847.868	1.12062	0.0339295	0.062	889.656	853.035	0.958837	0.325032	#	MYRIP	BC031275	Myosin VIIA and Rab interacting protein
1556272_a_at	408.629	751.982	0.543402	0.0290266	0.049	475.481	710.068	1.49337	0.119789	#	---	BC042472	Homo sapiens, clone IMAGE:4830283, mRNA
1556679_at	448.818	834.249	0.53799	0.027572	0.075	526.956	806.009	1.52956	0.0698164	#	YPEL2	AF085961	Yippee-like 2 (Drosophila)
1556690_s_at	527.115	471.941	1.11691	0.0128603	0.011	519.952	454.533	0.874182	0.0164448		ZNF42	AW341225	Zinc finger protein 42 (myeloid-specific retinoic acid-responsive)
1556724_at	329.196	287.587	1.14468	0.0266959	0.082	322.943	280.959	0.869997	0.000965234		---	BC036750	Transcribed locus, moderately similar to XP_375099.1 hypothetical protein LOC283585 [Homo sapiens]
1556831_at	338.266	307.592	1.09972	0.0182684	0.014	340.07	325.253	0.95643	0.318609	#	DNCH1	AI986267	Dynein, cytoplasmic, heavy polypeptide 1
1556864_at	472.887	665.328	0.710758	0.0247875	0.063	513.662	671.266	1.30682	0.0550209	#	FLJ21127	BC030993	Hypothetical protein FLJ21127
1557091_at	722.178	861.641	0.838142	0.000687853	0.041	792.084	901.637	1.13831	0.0348702		FLJ36070	BM973739	hypothetical protein FLJ36070
1557117_at	663.892	594.743	1.11627	0.0403495	0.085	644.312	547.562	0.849839	0.00729346		---	AW236954	Homo sapiens, clone IMAGE:4812643, mRNA, partial cds
1557158_s_at	316.912	405.08	0.782344	0.0236395	0.019	345.979	393.184	1.13644	0.198085	#	MLL3	AI479224	myeloid/lymphoid or mixed-lineage leukemia 3
1557235_at	511.878	464.966	1.10089	0.0361557	0.043	497.175	446.942	0.898963	0.0292159		---	BC042649	CDNA FLJ44051 fis, clone TESTI4033433
1557350_at	697.062	596.084	1.1694	0.00671014	0.1	669.473	560.625	0.837413	0.015588		G3BP	AA026297	Ras-GTPase-activating protein SH3-domain-binding protein
1557651_x_at	374.331	354.465	1.05605	0.0470912	0.036	372.449	350.208	0.940285	0.0894646	#	GALE	AK096127	galactose-4-epimerase, UDP-
1557918_s_at	401.097	437.379	0.917046	0.0469408	0.017	450.633	438.827	0.973803	0.647958	#	SLC16A1	AU131482	solute carrier family 16 (monocarboxylic acid transporters), member 1
1558048_x_at	657.88	945.445	0.695842	0.0144328	0.045	634.477	973.75	1.53473	0.0258076		---	BG389789	---
1558052_at	336.072	590.329	0.569296	0.0111389	0.087	388.204	571.201	1.47139	0.0539815	#	HNLF	BC001576	putative NFkB activating protein HNLF
1558119_at	385.593	340.99	1.1308	0.0401054	0.037	373.856	327.949	0.877207	0.00306681		TM4SF17	BG769410	transmembrane 4 superfamily member 17
1558140_at	335.889	296.623	1.13238	0.0322224	0.06	316.751	286.114	0.903279	0.0662626	#	PLXNA1	X87832	plexin A1
1558148_x_at	430.021	365.269	1.17727	5.61909e-06	0.048	408.17	350.303	0.858228	0.00398203		FLJ90757	BG030541	FLJ90757 protein
1558233_s_at	326.757	454.328	0.71921	0.0328399	0.05	344.481	496.955	1.44262	0.0237306		ATF1	CA337502	activating transcription factor 1
1558249_s_at	967.31	1075.59	0.899329	0.0203086	0.075	1026.81	1066.61	1.03876	0.426735	#	STX16	BE878126	syntaxin 16
1558338_at	385.027	316.858	1.21514	0.0127937	0.069	358.466	296.296	0.826567	0.00956066		SEMA6A	AB002453	Sema domain, transmembrane domain (TM), and cytoplasmic domain, (semaphorin) 6A
1558400_x_at	404.802	364.064	1.1119	0.0463094	0.068	410.116	373.599	0.910961	0.00665139		ANKRD24	AB075861	Ankyrin repeat domain 24
1558421_a_at	375.858	339.943	1.10565	0.0486941	0.014	356.4	330.835	0.92827	0.120708	#	---	BC041103	Similar to RIKEN cDNA A530016L24 gene
1558613_at	292.38	414.044	0.706156	0.0433477	0.067	327.38	418.049	1.27695	0.166898	#	NS5ATP13TP2	BC040647	NS5ATP13TP2 protein
1558699_a_at	338.622	629.045	0.538311	0.0197031	0.08	380.193	621.002	1.63339	0.0385856		FLJ22313	BG249246	hypothetical protein FLJ22313
1558825_s_at	384.168	341.449	1.12511	0.00140493	0	373.11	334.559	0.896677	0.00147309		AE2	AV661527	hypothetical protein AE2
1559110_at	353.047	317.196	1.11302	0.0181517	0.042	350.448	311.285	0.888248	0.00989945		---	BC042916	Homo sapiens, clone IMAGE:5802033, mRNA
1559533_at	321.232	290.933	1.10414	0.00339895	0.059	314.864	276.446	0.877985	0.00136782		PTPRE	BC036252	Protein tyrosine phosphatase, receptor type, E
1559688_at	655.314	1233.83	0.53112	0.0272902	0.082	774.931	1213.71	1.56622	0.0713601	#	LOC400581	AK000842	GRB2-related adaptor protein-like
1559715_at	519.685	462.203	1.12437	0.0214721	0.075	497.824	450.685	0.90531	0.0726503	#	---	BC042533	MRNA; cDNA DKFZp779L0250 (from clone DKFZp779L0250)
1559810_at	248.648	419.486	0.592746	0.0036154	0.007	254.398	423.555	1.66493	0.00816245		---	BF724577	---
1560047_s_at	421.056	344.104	1.22363	0.00898592	0.005	390.174	341.931	0.876356	0.105195	#	---	AA127813	LOC439962
1560059_at	316.553	289.425	1.09373	0.00811232	0.065	315.261	296.76	0.941317	0.108289	#	FLJ20847	BM452172	hypothetical protein FLJ20847
1560060_s_at	828.86	877.021	0.945086	0.045361	0.055	848.235	887.303	1.04606	0.440777	#	FLJ20847	BM452172	hypothetical protein FLJ20847
1560189_at	397.798	363.592	1.09408	0.00865041	0.073	381.126	358.485	0.940595	0.0394882		---	BC043405	Homo sapiens, clone IMAGE:6050118, mRNA
1560430_at	468.731	414.744	1.13017	0.0100518	0.05	449.13	406.362	0.904776	0.0824621	#	NKPD1	AK090919	NTPase, KAP family P-loop domain containing 1
1560474_at	333.349	295.682	1.12739	0.0272789	0.02	330.503	302.671	0.915789	0.0545538	#	NIPBL	BM728509	Nipped-B homolog (Drosophila)
1561052_s_at	554.789	748.319	0.74138	0.02215	0.041	583.992	741.574	1.26984	0.0445592		---	AF086219	---
1561263_at	483.89	430.536	1.12392	0.0486545	0.022	462.335	390.434	0.844483	0.01194		C1QTNF3	AK094895	C1q and tumor necrosis factor related protein 3
1561387_a_at	586.582	486.272	1.20628	0.0480456	0	495.599	480.648	0.969833	0.793891	#	MGC34290	BC037844	hypothetical protein MGC34290
1561480_a_at	298.426	420.536	0.709633	0.0217023	0.087	338.15	396.412	1.1723	0.142472	#	---	AA733018	CDNA FLJ34650 fis, clone KIDNE2017956
1561499_at	341.298	309.237	1.10368	0.0197995	0	335.563	304.346	0.90697	0.00715729		---	BC034308	Homo sapiens, clone IMAGE:4838775, mRNA, partial cds
1561501_s_at	406.688	659.794	0.616386	0.0432754	0.045	451.059	654.654	1.45137	0.0823091	#	LOC348180	AW575915	Hypothetical protein LOC348180
1561561_x_at	434.695	397.717	1.09298	0.00911843	0.07	439.676	397.019	0.902981	0.00488003		RAD52	BC026219	RAD52 homolog (S. cerevisiae)
1562232_at	435.963	386.34	1.12844	0.0175621	0.013	429.174	377.877	0.880473	0.0060172		---	AL833559	---
1562236_at	661.111	1205.09	0.548598	0.0380374	0.057	755.081	1299.28	1.72071	0.0355212		MYST4	AL832065	MYST histone acetyltransferase (monocytic leukemia) 4
1562324_a_at	358.202	316.716	1.13099	0.00767598	0.04	337.022	317.19	0.941156	0.171643	#	---	AL832093	---
1562368_at	474.868	427.744	1.11017	0.00692553	0.027	476.152	412.394	0.866097	6.66534e-05		CARD11	AL833692	Caspase recruitment domain family, member 11
1562537_at	414.405	356.633	1.16199	0.0321519	0.028	401.572	335.481	0.835421	0.0258789		FCER1A	BC015185	Fc fragment of IgE, high affinity I, receptor for; alpha polypeptide
1562624_at	490.192	447.218	1.09609	0.00269053	0.002	486.169	452.427	0.930598	0.00719949		LRP16	BC011360	LRP16 protein
1563030_at	546.823	486.124	1.12486	0.0206511	0.02	497.528	449.238	0.902941	0.145903	#	---	BC033139	Transcribed locus, weakly similar to NP_079012.2 gasdermin domain containing 1 [Homo sapiens]
1563120_at	478.056	394.047	1.21319	0.0170439	0.084	432.374	365.28	0.844825	0.0527267	#	PKP4	BC039475	Plakophilin 4
1563253_s_at	763.405	694.635	1.099	0.0171752	0.045	731.247	696.539	0.952535	0.168101	#	ERBB3	U88360	v-erb-b2 erythroblastic leukemia viral oncogene homolog 3 (avian)
1563302_at	1115.81	1020.58	1.09331	0.0367002	0.048	1117.75	1007.71	0.901552	0.00506321		---	BC033992	CDNA clone IMAGE:5296578, partial cds
1563513_at	349.085	557.009	0.626714	0.025281	0.015	386.901	531.518	1.37378	0.0781144	#	SYTL4	AL832596	Synaptotagmin-like 4 (granuphilin-a)
1563549_a_at	364.237	327.86	1.11095	0.0353891	0.039	375.075	337.663	0.900256	0.0416756		KIAA1623	AB046843	KIAA1623
1563668_at	375.623	332.949	1.12817	0.0474037	0.046	364.736	315.447	0.864864	0.00937702		FLJ13941	AK055432	Hypothetical protein FLJ13941
1563840_at	502.628	421.868	1.19143	0.000320816	0.063	489.638	413.901	0.845321	0.00124197		EFTUD1	BC040569	elongation factor Tu GTP binding domain containing 1
1564138_at	389.089	324.263	1.19992	0.00208833	0.047	349	316.889	0.907989	0.202457	#	FBXW12	AK097594	F-box and WD-40 domain protein 12
1564637_a_at	370.215	413.781	0.894713	0.0346829	0.04	361.829	417.258	1.15319	0.0140362		FLJ38426	BC035600	hypothetical protein FLJ38426
1564658_at	414.031	367.001	1.12815	0.018886	0.058	408.28	358.846	0.878922	0.030152		FLJ39237	BC037583	FLJ39237 protein
1564785_at	267.942	348.405	0.769054	0.0333731	0.064	290.394	366.704	1.26278	0.0791561	#	LOC196913	AF390030	Hypothetical protein LOC196913
1564790_at	351.446	617.783	0.568883	0.0258099	0	409.275	624.809	1.52662	0.062971	#	---	AF400045	Transcribed locus, moderately similar to NP_071727.1 Suppression of tumorigenicity 7 [Mus musculus]
1565358_at	803.569	1436.61	0.55935	0.036571	0.048	947.446	1462.4	1.54352	0.0739426	#	RARA	AJ417079	Retinoic acid receptor, alpha
1565894_at	398.021	367.103	1.08422	0.0217772	0.032	409.092	364.074	0.889955	0.00011003		---	BU623055	---
1565903_at	565.096	482.671	1.17077	0.00421718	0.026	546.896	478.119	0.874242	0.00858995		---	AI201321	---
1566136_at	535.054	393.404	1.36006	0.00648445	0.045	482.416	394.309	0.817365	0.021997		---	AK093884	---
1566177_at	994.121	900.746	1.10366	0.0284979	0.077	990.579	889.353	0.897812	0.00694321		---	AL713731	MRNA; cDNA DKFZp667E1010 (from clone DKFZp667E1010)
1566487_at	217.257	394.531	0.550672	0.0283887	0.026	260.221	380.95	1.46394	0.0931117	#	---	AL359607	---
1566974_at	354.176	304.478	1.16322	0.00450701	0.028	311.416	293.318	0.941884	0.188414	#	---	AL833846	---
1567014_s_at	380.168	422.681	0.899421	0.000340654	0.017	386.817	432.445	1.11796	0.00256488		CSNK2A1	AF323119	Casein kinase 2, alpha 1 polypeptide
1567252_at	264.363	472.672	0.559294	0.0219877	0.031	312.599	446.052	1.42692	0.106637	#	---	X64983	---
1567591_at	1049.47	895.969	1.17132	0.0243424	0.04	993.36	804.489	0.809866	0.00844847		---	AJ011598	Trapped 3' terminal exon, clone B2G5
1568249_at	1020.44	1265.46	0.806377	0.0448347	0.02	1051.69	1141.31	1.08521	0.039318		---	Y11166	Hypothetical LOC388796
1568592_at	599.098	840.819	0.712517	0.0189572	0.026	607.301	792.51	1.30497	0.0162599		---	BM976092	Hypothetical gene supported by BC031266
1568639_a_at	357.897	336.898	1.06233	0.0164113	0.052	348.95	331.569	0.95019	0.17176	#	---	BC033667	---
1568663_a_at	301.945	446.569	0.676145	0.0185866	0.056	340.21	429.998	1.26392	0.0933882	#	---	BC032951	Homo sapiens, clone IMAGE:5266772, mRNA
1568718_at	685.393	622.943	1.10025	0.0465199	0.037	701.095	618.996	0.882899	0.00424232		C6orf85	BC038748	chromosome 6 open reading frame 85
1568999_at	391.531	332.7	1.17683	0.0464439	0.064	385.182	323.96	0.841059	0.01608		PSG8 /// PSG4 /// PSG2 /// PSG6 /// PSG11 /// PSG9 /// PSG3 /// PSG1 /// PSG7	BC035419	pregnancy specific beta-1-glycoprotein 8 /// pregnancy specific beta-1-glycoprotein 4 /// pregnancy specific beta-1-glycoprotein 2 /// pregnancy specific beta-1-glycoprotein 6 /// pregnancy specific beta-1-glycoprotein 11 /// pregnancy specific beta-1-glycoprotein 9 /// pregnancy specific beta-1-glycoprotein 3 /// pregnancy specific beta-1-glycoprotein 1 /// pregnancy specific beta-1-glycoprotein…
1569351_at	349.708	388.545	0.900045	0.0416948	0.021	366.801	370.676	1.01056	0.747948	#	FLJ10159	BC014859	hypothetical protein FLJ10159
1569396_at	452.201	422.434	1.07047	0.0339473	0.063	448.751	421.841	0.940033	0.071248	#	RAB40C	BC014531	RAB40C, member RAS oncogene family
1569604_at	607.421	579.244	1.04865	0.0283447	0.029	605.133	584.185	0.965383	0.177675	#	---	BC017122	Transcribed locus, moderately similar to NP_942092.1 prostaglandin E synthase [Homo sapiens]
1569617_at	501.639	831.782	0.60309	0.0209545	0.038	567.355	799.599	1.40935	0.0609949	#	OSBP2	BC018025	Oxysterol binding protein 2
1569859_at	359.636	311.81	1.15338	0.0249544	0	349.565	299.842	0.857756	0.0333477		---	BC029610	---
1569895_at	518.889	474.647	1.09321	0.0179535	0.031	494.085	474.798	0.960965	0.295207	#	---	BC016994	Transcribed locus, moderately similar to NP_942092.1 prostaglandin E synthase [Homo sapiens]
1569906_s_at	306.374	357.922	0.855981	0.00850933	0.087	319.741	363.464	1.13675	0.0360599		C20orf104	BC015538	chromosome 20 open reading frame 104
1569991_at	328.014	309.559	1.05962	0.0409716	0.004	326.036	301.091	0.923491	0.010472		KY	BC024014	kyphoscoliosis peptidase
1570040_at	295.018	370.44	0.796399	0.0410112	0.03	305.718	374.312	1.22437	0.0752997	#	---	BC039334	---
1570338_at	570.134	881.891	0.64649	0.0424521	0.068	642.276	881.368	1.37226	0.0822588	#	---	BC019875	Transcribed locus, moderately similar to NP_078841.2 hypothetical protein FLJ14166 [Homo sapiens]
1570474_s_at	502.579	405.318	1.23996	0.044615	0.024	452.065	406.899	0.900089	0.235147	#	LOC338579	BC031237	hypothetical protein LOC338579
1729_at	386.914	367.177	1.05375	0.0155857	0.078	388.391	367.781	0.946934	0.0375109		TRADD	L41690	TNFRSF1A-associated via death domain
200064_at	5064.9	5546.5	0.913169	0.0336574	0.033	5679.71	5734.87	1.00971	0.870886	#	HSPCB	AF275719	heat shock 90kDa protein 1, beta /// heat shock 90kDa protein 1, beta
200086_s_at	5711.96	6164.04	0.926658	0.0379144	0.107	5664.98	6031.19	1.06464	0.19228	#	COX4I1	AA854966	cytochrome c oxidase subunit IV isoform 1 /// cytochrome c oxidase subunit IV isoform 1
200607_s_at	788.251	850.86	0.926417	0.0202458	0.065	775.797	832.229	1.07274	0.101952	#	RAD21	BG289967	RAD21 homolog (S. pombe)
200609_s_at	808.933	889.517	0.909407	0.0449394	0.068	897.223	957.962	1.0677	0.0435686		WDR1	NM_017491	WD repeat domain 1
200627_at	2314.39	2620	0.883355	0.0331694	0.058	2429.76	2687.2	1.10595	0.206183	#	TEBP	BC003005	unactive progesterone receptor, 23 kD
200664_s_at	268.45	345.481	0.777034	0.00112594	0.044	334.611	376.359	1.12477	0.0150234		DNAJB1	BG537255	DnaJ (Hsp40) homolog, subfamily B, member 1
200666_s_at	475.068	600.024	0.791749	0.014585	0.027	571.849	643.794	1.12581	0.00824019		DNAJB1	NM_006145	DnaJ (Hsp40) homolog, subfamily B, member 1
200690_at	714.857	792.778	0.901711	0.0112073	0.051	687.328	770.94	1.12165	0.0365534		HSPA9B	AA927701	heat shock 70kDa protein 9B (mortalin-2)
200691_s_at	1890.59	2111.99	0.895166	0.00520029	0.065	1896.89	2113.01	1.11393	0.0521593	#	HSPA9B	BC000478	heat shock 70kDa protein 9B (mortalin-2)
200718_s_at	4950.81	5264.5	0.940413	0.0387848	0.04	5027.29	5283.93	1.05105	0.116545	#	SKP1A	AA927664	S-phase kinase-associated protein 1A (p19A)
200722_s_at	532.043	574.076	0.926781	0.0274185	0.077	559.002	611.315	1.09358	0.0102275		M11S1	BG258784	membrane component, chromosome 11, surface marker 1
200742_s_at	577.814	624.027	0.925944	0.027498	0.016	590.448	597.503	1.01195	0.760686	#	CLN2	BG231932	ceroid-lipofuscinosis, neuronal 2, late infantile (Jansky-Bielschowsky disease)
200753_x_at	716.86	768.373	0.932959	0.0378252	0.079	777.654	774.504	0.995949	0.903295	#	SFRS2	BE866585	splicing factor, arginine/serine-rich 2
200774_at	2043.93	2342.99	0.87236	0.023692	0.02	2204.85	2472.41	1.12135	0.0664721	#	C9orf10	BE963765	chromosome 9 open reading frame 10
200777_s_at	578.647	648.821	0.891843	0.0298639	0.025	654.967	705.606	1.07731	0.558784	#	BZW1	NM_014670	basic leucine zipper and W2 domains 1
200784_s_at	1029.25	928.757	1.1082	0.0292228	0	984.736	845.11	0.85821	0.00377719		LRP1	BF304759	low density lipoprotein-related protein 1 (alpha-2-macroglobulin receptor)
200799_at	3521.72	4772.15	0.737974	0.0106412	0.088	3625.43	4356.8	1.20173	0.0703161	#	HSPA1A	NM_005345	heat shock 70kDa protein 1A
200806_s_at	872.209	1081.88	0.806198	0.00613479	0.042	1018.77	1118.52	1.0979	0.404747	#	HSPD1	BE256479	heat shock 60kDa protein 1 (chaperonin)
200807_s_at	2279.11	2708.67	0.841415	0.00791897	0.015	2467.15	2756.84	1.11742	0.24474	#	HSPD1	NM_002156	heat shock 60kDa protein 1 (chaperonin)
200841_s_at	307.939	357.122	0.862281	0.0132466	0.053	323.435	352.289	1.08921	0.18793	#	EPRS	AI142677	glutamyl-prolyl-tRNA synthetase
200877_at	1674.82	1887.63	0.887262	0.0211287	0.04	1769.27	2025.76	1.14496	0.0966932	#	CCT4	NM_006430	chaperonin containing TCP1, subunit 4 (delta)
200880_at	399.246	499.341	0.799546	0.00760542	0.045	412.63	578.553	1.40211	0.000946403		---	AL534104	---
200885_at	505.468	448.819	1.12622	0.0232141	0.091	510.419	460.493	0.902186	0.0714407	#	RHOC	NM_005167	ras homolog gene family, member C
200895_s_at	574.82	658.794	0.872533	0.010421	0.018	624.318	680.478	1.08995	0.201525	#	FKBP4	NM_002014	FK506 binding protein 4, 59kDa
200901_s_at	687.078	612.03	1.12262	0.0339316	0.05	682.589	614.972	0.900941	0.0216602		M6PR	NM_002355	mannose-6-phosphate receptor (cation dependent)
200908_s_at	421.596	360.176	1.17053	0.00738948	0.038	390.472	356.178	0.912173	0.0662816	#	---	BC005354	---
200927_s_at	755.912	838.6	0.901397	0.0307512	0.061	791.481	880.212	1.11211	0.0411834		RAB14	AA919115	RAB14, member RAS oncogene family
200946_x_at	476.715	535.223	0.890684	0.010229	0.012	500.874	542.738	1.08358	0.101721	#	GLUD1	AI339331	glutamate dehydrogenase 1
200947_s_at	432.106	484.701	0.89149	0.00472841	0.015	433.631	491.507	1.13347	0.029078		GLUD1	NM_005271	glutamate dehydrogenase 1
200956_s_at	824.611	737.773	1.1177	0.0251333	0.028	862.447	761.013	0.882388	0.067801	#	SSRP1	BE795648	structure specific recognition protein 1
200963_x_at	8420.98	8801.97	0.956715	0.0272739	0.064	8188.95	8948.78	1.09279	0.00368912		RPL31	NM_000993	ribosomal protein L31
200967_at	573.453	513.352	1.11708	0.0452462	0.034	560.483	529.038	0.943898	0.244853	#	PPIB	NM_000942	peptidylprolyl isomerase B (cyclophilin B)
200971_s_at	355.508	382.573	0.929256	0.0399467	0.032	379.555	393.949	1.03792	0.457099	#	SERP1	NM_014445	stress-associated endoplasmic reticulum protein 1
200978_at	5316.95	5987.83	0.887959	0.0401128	0.018	5302.27	5791.96	1.09235	0.283884	#	MDH1	NM_005917	malate dehydrogenase 1, NAD (soluble)
200996_at	542.549	617.713	0.878319	0.010875	0.044	626.292	632.908	1.01056	0.925554	#	ACTR3	NM_005721	ARP3 actin-related protein 3 homolog (yeast)
201001_s_at	428.707	494.135	0.867592	0.0176011	0.039	486.089	528.571	1.0874	0.209257	#	UBE2V1 /// Kua-UEV	BG164064	ubiquitin-conjugating enzyme E2 variant 1 /// ubiquitin-conjugating enzyme E2 variant 1
201008_s_at	5276.94	2213.34	2.38415	0.00771546	0.067	2315.77	2054.32	0.8871	0.666876	#	TXNIP	AA812232	thioredoxin interacting protein
201009_s_at	6091.06	2586.45	2.35499	0.0061561	0.062	2654.83	2373.27	0.893946	0.667101	#	TXNIP	AI439556	thioredoxin interacting protein
201010_s_at	8180.6	4205.27	1.94532	0.00702342	0.073	4123.05	3854.04	0.934755	0.74314	#	TXNIP	NM_006472	thioredoxin interacting protein
201013_s_at	345.056	400.336	0.861915	0.00300343	0.055	374.969	400.273	1.06748	0.545568	#	PAICS	AA902652	phosphoribosylaminoimidazole carboxylase, phosphoribosylaminoimidazole succinocarboxamide synthetase
201030_x_at	2013.79	3302.42	0.609792	0.00694795	0.047	2131.12	3438.74	1.61358	0.000798819		LDHB	NM_002300	lactate dehydrogenase B
201051_at	838.55	970.707	0.863855	0.0155803	0.027	956.072	1063.22	1.11207	0.0403901		ANP32A	BE560202	Acidic (leucine-rich) nuclear phosphoprotein 32 family, member A
201055_s_at	552.244	497.548	1.10993	0.0377666	0.041	525.393	505.616	0.962358	0.422181	#	HNRPA0	NM_006805	heterogeneous nuclear ribonucleoprotein A0
201064_s_at	3936.54	4307.22	0.913939	0.045489	0.046	3825.96	4318.35	1.1287	0.0113418		PABPC4	NM_003819	poly(A) binding protein, cytoplasmic 4 (inducible form)
201075_s_at	313.8	360.124	0.871365	0.0362316	0.065	312.793	340.157	1.08748	0.153962	#	SMARCC1	NM_003074	SWI/SNF related, matrix associated, actin dependent regulator of chromatin, subfamily c, member 1
201083_s_at	308.397	363.699	0.847946	0.00275686	0.049	296.961	368.365	1.24045	0.00118203		BCLAF1	AA740754	BCL2-associated transcription factor 1
201086_x_at	984.186	1087.72	0.904813	0.0495283	0.017	1020.74	1065.67	1.04401	0.100996	#	SON	NM_003103	SON DNA binding protein
201090_x_at	1935.68	2257.94	0.857276	0.0246394	0.05	2618.15	2616.1	0.999215	0.994857	#	K-ALPHA-1	NM_006082	tubulin, alpha, ubiquitous
201111_at	676.699	840.988	0.804647	0.0213279	0.01	713.866	882.518	1.23625	0.0248261		CSE1L	AF053641	CSE1 chromosome segregation 1-like (yeast)
201133_s_at	779.758	883.875	0.882204	0.0158795	0	816.263	924.665	1.1328	0.032292		PJA2	AA142966	praja 2, RING-H2 motif containing
201158_at	298.703	346.486	0.862093	0.0115357	0.045	327.086	360.068	1.10084	0.143695	#	NMT1	AI570834	N-myristoyltransferase 1
201169_s_at	323.711	350.416	0.92379	0.0357985	0.023	393.709	439.048	1.11516	0.147327	#	BHLHB2	BG326045	basic helix-loop-helix domain containing, class B, 2
201174_s_at	833.756	1160.37	0.718524	0.0361013	0	877.006	1215.73	1.38623	0.029637		TERF2IP	NM_018975	telomeric repeat binding factor 2, interacting protein
201176_s_at	603.417	665.707	0.906429	0.0352044	0.051	631.847	713.845	1.12978	0.0383239		ARCN1	NM_001655	archain 1
201186_at	606.786	558.853	1.08577	0.0353259	0.053	593.533	558.022	0.94017	0.218929	#	LRPAP1	NM_002337	low density lipoprotein receptor-related protein associated protein 1
201188_s_at	1245.59	1049.13	1.18726	0.00942262	0.083	1273.49	1024.04	0.804122	0.00187757		ITPR3	D26351	inositol 1,4,5-triphosphate receptor, type 3
201193_at	426.711	499.632	0.854051	0.0288276	0.028	460.085	559.937	1.21703	0.00157217		IDH1	NM_005896	isocitrate dehydrogenase 1 (NADP+), soluble
201196_s_at	327.757	378.445	0.866063	0.00848486	0.037	366.463	401.499	1.0956	0.0543937	#	AMD1	M21154	adenosylmethionine decarboxylase 1
201197_at	303.598	362.313	0.837945	0.0415146	0.059	342.87	420.784	1.22724	0.0291455		AMD1	NM_001634	adenosylmethionine decarboxylase 1
201253_s_at	802.988	936.221	0.85769	0.0292826	0.048	796.58	888.955	1.11596	0.145022	#	CDIPT	NM_006319	CDP-diacylglycerol--inositol 3-phosphatidyltransferase (phosphatidylinositol synthase)
201263_at	453.902	512.117	0.886325	0.0316989	0.014	473.979	526.738	1.11131	0.0851319	#	TARS	NM_003191	threonyl-tRNA synthetase
201273_s_at	3270.08	3617.76	0.903896	0.012494	0.028	3395.87	3665.25	1.07933	0.0895193	#	SRP9	NM_003133	signal recognition particle 9kDa
201316_at	436.341	474.74	0.919115	0.0353345	0.026	432.391	478.479	1.10659	0.00366696		PSMA2	AL523904	proteasome (prosome, macropain) subunit, alpha type, 2
201321_s_at	668.763	752.855	0.888303	0.0262169	0.087	687.647	741.167	1.07783	0.011147		SMARCC2	NM_003075	SWI/SNF related, matrix associated, actin dependent regulator of chromatin, subfamily c, member 2
201330_at	352.913	403.979	0.873593	0.0411992	0.03	371.879	388.815	1.04554	0.484228	#	RARS	NM_002887	arginyl-tRNA synthetase
201355_s_at	434.311	411.917	1.05437	0.019055	0	432.906	409.956	0.946985	0.0245641		BAZ2A	NM_013449	bromodomain adjacent to zinc finger domain, 2A
201385_at	516.747	590.023	0.875809	0.0112139	0.071	543.69	668.951	1.23039	0.00105092		DHX15	NM_001358	DEAH (Asp-Glu-Ala-His) box polypeptide 15
201394_s_at	412.065	355.505	1.1591	0.0385711	0.085	394.511	374.399	0.949019	0.398042	#	RBM5	U23946	RNA binding motif protein 5
201422_at	545.289	516.935	1.05485	0.0487134	0.009	558.688	517.489	0.926257	0.0811854	#	IFI30	NM_006332	interferon, gamma-inducible protein 30
201429_s_at	14279.7	14867.6	0.960459	0.0221905	0.004	14180.5	15074.9	1.06308	0.00313647		RPL37A	NM_000998	ribosomal protein L37a
201435_s_at	723.265	782.011	0.924877	0.0253049	0.041	750.641	822.109	1.09521	0.0200932		EIF4E	AW268640	eukaryotic translation initiation factor 4E
201439_at	604.218	562.732	1.07372	0.0493811	0.034	581.417	553.761	0.952433	0.076234	#	GBF1	NM_004193	golgi-specific brefeldin A resistance factor 1
201459_at	605.355	641.135	0.944192	0.0353761	0.069	613.502	621.487	1.01301	0.804721	#	RUVBL2	NM_006666	RuvB-like 2 (E. coli)
201474_s_at	737.312	569.522	1.29462	0.0155025	0.017	684.987	633.096	0.924244	0.447559	#	ITGA3	NM_002204	integrin, alpha 3 (antigen CD49C, alpha 3 subunit of VLA-3 receptor)
201482_at	697.646	1151.37	0.605928	0.0171488	0.04	788.672	1122.6	1.42341	0.0498479		QSCN6	NM_002826	quiescin Q6
201491_at	1015.12	1134.4	0.89485	0.0267194	0.095	1049.16	1160.98	1.10658	0.076911	#	AHSA1	NM_012111	AHA1, activator of heat shock 90kDa protein ATPase homolog 1 (yeast)
201504_s_at	455.737	497.652	0.915775	0.0448893	0.057	475.074	495.654	1.04332	0.234576	#	TSN	AI435302	translin
201507_at	1114.91	1405.66	0.793157	0.0334943	0.036	1087.27	1283.29	1.18028	0.0138727		PFDN1	NM_002622	prefoldin 1
201615_x_at	1001.52	855.784	1.17029	0.0107827	0.058	972.731	830.271	0.853547	0.00395905		CALD1	AI685060	caldesmon 1
201647_s_at	447.416	513.624	0.871097	0.0132291	0.025	513.237	562.448	1.09589	0.335238	#	SCARB2	NM_005506	scavenger receptor class B, member 2
201659_s_at	424.697	490.945	0.86506	0.00145669	0.073	432.752	494.201	1.142	0.0126904		ARL1	NM_001177	ADP-ribosylation factor-like 1
201670_s_at	358.853	418.764	0.856934	0.0481551	0.018	380.34	472.948	1.24349	0.0944955	#	MARCKS	M68956	myristoylated alanine-rich protein kinase C substrate
201680_x_at	441.81	493.714	0.894872	0.013429	0.02	491.743	504.563	1.02607	0.748844	#	ARS2	NM_015908	arsenate resistance protein ARS2
201710_at	369.15	342.132	1.07897	0.00282173	0.056	361.912	338.668	0.935774	0.0951495	#	MYBL2	NM_002466	v-myb myeloblastosis viral oncogene homolog (avian)-like 2
201711_x_at	483.46	540.842	0.893901	0.0056749	0.004	526.331	557.398	1.05903	0.23685	#	RANBP2	AI681120	RAN binding protein 2
201712_s_at	328.326	366.251	0.896451	0.0214843	0	339.64	382.565	1.12638	0.0342195		RANBP2	NM_006267	RAN binding protein 2
201726_at	673.108	778.375	0.864761	0.00174448	0.063	724.772	820.894	1.13262	0.130289	#	ELAVL1	BC003376	ELAV (embryonic lethal, abnormal vision, Drosophila)-like 1 (Hu antigen R)
201749_at	463.907	430.428	1.07778	0.0064912	0.039	447.556	409.804	0.915648	0.00959547		ECE1	BF969352	Endothelin converting enzyme 1
201765_s_at	767.507	672.941	1.14053	0.0176074	0	753.739	663.2	0.879881	0.000717472		HEXA	AL523158	hexosaminidase A (alpha polypeptide)
201772_at	408.395	510.467	0.800042	0.00250654	0	545.045	708.893	1.30061	0.00116257		OAZIN	NM_015878	ornithine decarboxylase antizyme inhibitor
201781_s_at	377.882	346.02	1.09208	0.000184633	0.024	360.791	343.024	0.950754	0.0741836	#	AIP	AL558532	aryl hydrocarbon receptor interacting protein
201837_s_at	326.012	350.41	0.930373	0.0404428	0	328.984	357.195	1.08575	0.00102519		STAF65(gamma)	AF197954	SPTF-associated factor 65 gamma
201863_at	621.162	815.902	0.761319	0.0240336	0	655.515	795.659	1.21379	0.0729297	#	FAM32A	NM_014077	family with sequence similarity 32, member A
201879_at	608.727	667.889	0.91142	0.0238207	0.037	619.522	676.65	1.09221	0.0334054		ARIH1	AI694332	ariadne homolog, ubiquitin-conjugating enzyme E2 binding protein, 1 (Drosophila)
201882_x_at	365.35	314.713	1.1609	0.0206967	0.016	344.317	306.836	0.891144	0.0151365		B4GALT1	AI492393	UDP-Gal:betaGlcNAc beta 1,4- galactosyltransferase, polypeptide 1
201897_s_at	300.939	329.62	0.912986	0.0212145	0.054	306.955	330.056	1.07526	0.0257912		CKS1B	NM_001826	CDC28 protein kinase regulatory subunit 1B
201908_at	631.003	730.885	0.86334	0.0416175	0.037	641.996	734.593	1.14423	0.00612227		DVL3	NM_004423	dishevelled, dsh homolog 3 (Drosophila)
201910_at	377.449	351.388	1.07416	0.0349418	0.059	371.527	348.061	0.936839	0.0802376	#	FARP1	BF213279	FERM, RhoGEF (ARHGEF) and pleckstrin domain protein 1 (chondrocyte-derived)
201946_s_at	471.179	512.088	0.920112	0.0402866	0.045	560.152	592.917	1.05849	0.667461	#	CCT2	AL545982	chaperonin containing TCP1, subunit 2 (beta)
201954_at	1044.35	936.988	1.11458	0.0473294	0.05	1031.74	954.858	0.925482	0.107798	#	ARPC1B	NM_005720	actin related protein 2/3 complex, subunit 1B, 41kDa
201987_at	1181.23	1383.82	0.853601	0.0317358	0.051	1169.9	1373.93	1.1744	0.00212232		THRAP1	AI984051	Thyroid hormone receptor associated protein 1
201997_s_at	507.724	581.051	0.873804	0.0121878	0.076	513.836	605.602	1.17859	0.00154007		SHARP	NM_015001	SMART/HDAC1 associated repressor protein
202006_at	308.793	367.462	0.840337	0.0079718	0.048	329.548	357.587	1.08508	0.318234	#	PTPN12	NM_002835	protein tyrosine phosphatase, non-receptor type 12
202021_x_at	7454.76	8080.2	0.922596	0.0178	0.035	7680.55	7671.34	0.9988	0.984275	#	SUI1	AF083441	putative translation initiation factor
202028_s_at	2303.85	1641.66	1.40336	0.000108333	0.036	2106.21	1732.16	0.822405	0.00431101		---	BC000603	---
202051_s_at	435.728	474.074	0.919114	0.0307693	0.044	411.962	464.593	1.12776	0.0252678		ZNF262	NM_005095	zinc finger protein 262
202061_s_at	911.062	999.552	0.911471	0.0130737	0	915.926	967.725	1.05655	0.269116	#	SEL1L	AI927770	sel-1 suppressor of lin-12-like (C. elegans)
202065_s_at	366.62	340.497	1.07672	0.0462949	0.054	365.377	340.306	0.931385	0.0220648		PPFIA1	BG033593	protein tyrosine phosphatase, receptor type, f polypeptide (PTPRF), interacting protein (liprin), alpha 1
202067_s_at	485.79	445.024	1.0916	0.0472597	0.064	494.154	436.294	0.882912	0.0181059		LDLR	AI861942	low density lipoprotein receptor (familial hypercholesterolemia)
202092_s_at	522.128	568.404	0.918586	0.0431991	0.019	544.581	570.591	1.04776	0.292484	#	ARL2BP	BF244411	ADP-ribosylation factor-like 2 binding protein
202103_at	586.206	517.918	1.13185	0.0287374	0.044	552.969	525.806	0.950878	0.396191	#	BRD4	AI991631	bromodomain containing 4
202158_s_at	360.183	396.899	0.907492	0.0486331	0.022	386.781	429.253	1.10981	0.218792	#	CUGBP2	NM_006561	CUG triplet repeat, RNA binding protein 2
202177_at	538.504	610.069	0.882693	0.0425875	0.022	622.884	620.311	0.995869	0.963818	#	GAS6	NM_000820	growth arrest-specific 6
202225_at	448.108	516.436	0.867692	0.0134557	0.011	504.824	607.071	1.20254	0.00502522		CRK	AW612311	V-crk sarcoma virus CT10 oncogene homolog (avian)
202236_s_at	1244.81	1425.72	0.873111	0.0479735	0	1275.62	1402.56	1.09951	0.254769	#	SLC16A1	NM_003051	solute carrier family 16 (monocarboxylic acid transporters), member 1
202239_at	374.52	350.987	1.06705	0.0381363	0.066	369.029	340.101	0.921612	0.0367519		PARP4	NM_006437	poly (ADP-ribose) polymerase family, member 4
202241_at	787.542	1010.3	0.779516	0.00536337	0.058	925.367	1136.53	1.22819	0.0311914		TRIB1	NM_025195	tribbles homolog 1 (Drosophila)
202246_s_at	496.661	548.25	0.905903	0.0346373	0.067	529.01	534.5	1.01038	0.855093	#	CDK4	NM_000075	cyclin-dependent kinase 4
202249_s_at	821.458	920.484	0.89242	0.0122958	0.081	834.883	903.091	1.0817	0.282257	#	WDR42A	AU146233	WD repeat domain 42A
202265_at	787.595	963.002	0.817854	0.0227808	0.065	802.582	1068.95	1.33189	0.000330797		BMI1	NM_005180	B lymphoma Mo-MLV insertion region (mouse)
202298_at	5179.82	5477.75	0.945611	0.0438943	0.036	5128.96	5361.93	1.04542	0.39098	#	NDUFA1	NM_004541	NADH dehydrogenase (ubiquinone) 1 alpha subcomplex, 1, 7.5kDa
202299_s_at	1613.46	1748.65	0.922688	0.0191723	0.059	1614.64	1755.1	1.08699	0.109995	#	HBXIP	NM_006402	hepatitis B virus x interacting protein
202308_at	373.452	500.654	0.745928	0.000335254	0.023	467.977	732.347	1.56492	0.00203255		SREBF1	NM_004176	sterol regulatory element binding transcription factor 1
202344_at	947.573	1088.75	0.870333	0.00998312	0.021	915.409	1123.28	1.22708	0.00127553		HSF1	NM_005526	heat shock transcription factor 1
202370_s_at	403.501	488.369	0.826221	0.00247898	0.051	535.022	572.195	1.06948	0.671607	#	CBFB	NM_001755	core-binding factor, beta subunit
202376_at	410.224	374.73	1.09472	0.00613484	0.015	427.504	370.628	0.866959	0.10833	#	SERPINA3	NM_001085	serine (or cysteine) proteinase inhibitor, clade A (alpha-1 antiproteinase, antitrypsin), member 3
202377_at	590.822	637.455	0.926846	0.0411876	0.059	581.569	648.439	1.11498	0.00620053		OBRGRP /// LEPR	AW026535	leptin receptor gene-related protein /// leptin receptor
202393_s_at	1890.97	953.221	1.98377	0.0082392	0.047	1186.01	1267.51	1.06872	0.63273	#	TIEG	NM_005655	TGFB inducible early growth response
202396_at	375.634	427.71	0.878245	0.00999558	0.026	354.754	411.217	1.15916	0.00404446		TCERG1	NM_006706	transcription elongation regulator 1
202427_s_at	1642.13	1849.79	0.887741	0.0153139	0.07	1603.79	1845.13	1.15048	0.0383818		DKFZP564B167	NM_015415	DKFZP564B167 protein
202464_s_at	2652.97	881.301	3.01029	0.0181645	0.043	860.483	1099.08	1.27728	0.0791355	#	PFKFB3	NM_004566	6-phosphofructo-2-kinase/fructose-2,6-biphosphatase 3
202473_x_at	477.23	433.227	1.10157	0.00266931	0.032	459.205	428.807	0.933803	0.0222752		HCFC1	AA703045	host cell factor C1 (VP16-accessory protein)
202489_s_at	338.74	315.146	1.07487	0.0285036	0.018	340.685	312.597	0.917555	0.0110233		FXYD3	BC005238	FXYD domain containing ion transport regulator 3
202491_s_at	342.924	392.52	0.873646	0.0377461	0.022	342.571	406.447	1.18646	0.0031687		IKBKAP	NM_003640	inhibitor of kappa light polypeptide gene enhancer in B-cells, kinase complex-associated protein
202554_s_at	1065.94	875.942	1.21691	0.0492077	0.096	1047.27	892.268	0.851994	0.11986	#	GSTM3	AL527430	glutathione S-transferase M3 (brain)
202560_s_at	818.036	1056.63	0.774191	0.0182724	0.031	862.944	1135.02	1.31528	0.00457795		DKFZP547E1010	NM_015607	DKFZP547E1010 protein
202562_s_at	331.396	358.517	0.924353	0.0116456	0.006	334.426	345.455	1.03298	0.117077	#	C14orf1	AL136658	chromosome 14 open reading frame 1
202608_s_at	357.123	319.306	1.11843	0.00691631	0.041	346.18	307.836	0.889239	0.019272		NDST1	NM_001543	N-deacetylase/N-sulfotransferase (heparan glucosaminyl) 1
202615_at	517.861	620.033	0.835215	0.0184497	0.034	523.351	609.032	1.16372	0.00772174		GNAQ	BF222895	guanine nucleotide binding protein (G protein), q polypeptide
202616_s_at	292.591	335.007	0.873387	0.00854327	0.025	295.768	337.151	1.13992	0.000494806		MECP2	AI631140	methyl CpG binding protein 2 (Rett syndrome)
202621_at	655.03	561.378	1.16682	0.0363174	0.051	596.925	581.625	0.974368	0.647509	#	IRF3	NM_001571	interferon regulatory factor 3
202622_s_at	386.843	481.688	0.803098	0.0296887	0.03	416.775	493.192	1.18335	0.0711855	#	ATXN2	NM_002973	ataxin 2
202630_at	367.54	402.163	0.913909	0.012748	0.039	357.144	400.307	1.12085	0.00460846		APPBP2	AA046411	amyloid beta precursor protein (cytoplasmic tail) binding protein 2
202658_at	331.575	371.016	0.893696	0.0223235	0.042	348.18	376.942	1.08261	0.0739733	#	PEX11B	NM_003846	peroxisomal biogenesis factor 11B
202675_at	2256.47	2621.2	0.860857	0.0113583	0.034	2238.6	2626.35	1.17321	0.0213782		SDHB	NM_003000	succinate dehydrogenase complex, subunit B, iron sulfur (Ip)
202703_at	425.906	684.093	0.622585	0.0116255	0.028	462.943	691.401	1.49349	0.0223142		DUSP11	NM_003584	dual specificity phosphatase 11 (RNA/RNP complex 1-interacting)
202713_s_at	425.545	459.62	0.925863	0.0414423	0.071	430.196	456.825	1.0619	0.191966	#	KIAA0391	AA129755	KIAA0391
202743_at	403.682	339.392	1.18943	0.0210909	0.058	377.722	319.355	0.845477	0.0116625		PIK3R3	BE622627	phosphoinositide-3-kinase, regulatory subunit 3 (p55, gamma)
202750_s_at	484.426	442.77	1.09408	0.0468311	0.011	437.164	428.843	0.980966	0.66472	#	TFIP11	AL080147	tuftelin interacting protein 11
202773_s_at	325.469	291.073	1.11817	0.00761686	0.022	313.761	286.267	0.912373	0.0179891		SFRS8	AI023864	splicing factor, arginine/serine-rich 8 (suppressor-of-white-apricot homolog, Drosophila)
202829_s_at	473.794	521.687	0.908196	0.0213896	0.02	482.762	524.946	1.08738	0.10056	#	SYBL1	NM_005638	synaptobrevin-like 1
202838_at	646.002	788.159	0.819634	0.020062	0.065	693.47	775.101	1.11771	0.150528	#	FUCA1	NM_000147	fucosidase, alpha-L- 1, tissue
202862_at	374.447	407.309	0.919319	0.0436394	0.03	367.915	420.957	1.14417	0.0328865		FAH	NM_000137	fumarylacetoacetate hydrolase (fumarylacetoacetase)
202880_s_at	354.363	398.855	0.888449	0.0483481	0.052	380.07	408.525	1.07487	0.207083	#	PSCD1	NM_004762	pleckstrin homology, Sec7 and coiled-coil domains 1(cytohesin 1)
202881_x_at	411.62	384.272	1.07117	0.0486273	0.056	401.622	382.804	0.953145	0.327876	#	RANBP9	AF172066	RAN binding protein 9
202905_x_at	364.709	408.728	0.8923	0.0409243	0.107	354.084	377.023	1.06478	0.107857	#	NBS1	AI796269	Nijmegen breakage syndrome 1 (nibrin)
202907_s_at	547.611	637.831	0.858552	0.0427848	0.015	534.95	604.71	1.13041	0.0128506		NBS1	NM_002485	Nijmegen breakage syndrome 1 (nibrin)
202960_s_at	531.86	642.048	0.828382	0.0022112	0.037	500.148	604.436	1.20851	0.00131358		MUT	NM_000255	methylmalonyl Coenzyme A mutase
202972_s_at	368.645	347.614	1.0605	0.0244133	0.029	384.918	365.618	0.949859	0.334825	#	FAM13A1	AW450403	family with sequence similarity 13, member A1
202976_s_at	521.869	597.262	0.873769	0.0379534	0.046	493.839	635.611	1.28708	0.00112659		RHOBTB3	NM_014899	Rho-related BTB domain containing 3
202985_s_at	359.864	390.983	0.920407	0.0281805	0	378.88	429.354	1.13322	0.00469447		BAG5	NM_004873	BCL2-associated athanogene 5
202986_at	276.708	343.212	0.806229	0.021794	0.054	270.211	310.744	1.15001	0.136516	#	ARNT2	NM_014862	aryl-hydrocarbon receptor nuclear translocator 2
203002_at	395.374	482.02	0.820244	0.00591224	0.015	419.069	536.746	1.28081	0.00800516		AMOTL2	NM_016201	angiomotin like 2
203005_at	443.178	473.068	0.936815	0.0154712	0.019	449.55	473.812	1.05397	0.170639	#	LTBR	NM_002342	lymphotoxin beta receptor (TNFR superfamily, member 3)
203025_at	646.277	592.956	1.08992	0.0114992	0.074	627.314	594.578	0.947816	0.170827	#	ARD1	NM_003491	ARD1 homolog, N-acetyltransferase (S. cerevisiae)
203046_s_at	490.968	400.598	1.22559	0.0017523	0.071	473.196	393.464	0.831503	0.00371031		TIMELESS	NM_003920	timeless homolog (Drosophila)
203079_s_at	621.398	739.668	0.840105	0.00217174	0.02	612.54	707.484	1.155	0.0112102		CUL2	NM_003591	cullin 2
203100_s_at	563.649	613.205	0.919186	0.032399	0.042	540.859	588.889	1.0888	0.0503233	#	CDYL	NM_004824	chromodomain protein, Y-like
203160_s_at	441.3	484.76	0.910347	0.0321996	0.032	447.031	463.045	1.03582	0.223587	#	RNF8	AK022075	ring finger protein (C3HC4 type) 8
203166_at	391.492	458.316	0.854197	0.025822	0.048	433.525	484.963	1.11865	0.0501591	#	CFDP1	NM_006324	craniofacial development protein 1
203199_s_at	461.421	544.184	0.847913	0.0141052	0.025	471.483	523.483	1.11029	0.0127275		MTRR	N29717	5-methyltetrahydrofolate-homocysteine methyltransferase reductase
203200_s_at	582.157	692.694	0.840424	0.0327592	0.036	588.486	694.378	1.17994	0.0778619	#	MTRR	NM_024010	5-methyltetrahydrofolate-homocysteine methyltransferase reductase
203272_s_at	418.708	398.272	1.05131	0.0263569	0.064	425.141	394.868	0.928792	0.0742724	#	TUSC2	BF308548	tumor suppressor candidate 2
203348_s_at	315.621	286.115	1.10313	0.0249731	0	300.303	286.869	0.955266	0.406882	#	ETV5	BF060791	ets variant gene 5 (ets-related molecule)
203353_s_at	472.492	525.245	0.899565	0.0142532	0.059	485.315	510.328	1.05154	0.106661	#	MBD1	NM_015846	methyl-CpG binding domain protein 1
203394_s_at	458.98	564.522	0.813042	0.0496755	0.024	733.847	774.516	1.05542	0.703773	#	HES1	BE973687	hairy and enhancer of split 1, (Drosophila)
203428_s_at	308.464	339.507	0.908566	0.00414633	0.046	315.932	371.312	1.17529	0.000648948		ASF1A	AB028628	ASF1 anti-silencing function 1 homolog A (S. cerevisiae)
203450_at	433.931	482.275	0.899758	0.0040171	0.029	436.733	476.791	1.09172	0.00696644		PGEA1	NM_015373	PKD2 interactor, golgi and endoplasmic reticulum associated 1
203486_s_at	769.746	849.163	0.906477	0.0116413	0.061	795.871	872.759	1.09661	0.00585995		ARMC8	BF195973	armadillo repeat containing 8
203504_s_at	361.342	318.734	1.13368	0.0362057	0.073	267.359	308.237	1.1529	0.0877147	#	ABCA1	NM_005502	ATP-binding cassette, sub-family A (ABC1), member 1
203508_at	351.482	316.947	1.10896	0.00332748	0.062	338.864	305.921	0.902784	0.0175334		TNFRSF1B	NM_001066	tumor necrosis factor receptor superfamily, member 1B
203525_s_at	300.605	339.459	0.885542	0.013044	0.035	286.208	338.852	1.18394	0.000703143		APC	AI375486	adenomatosis polyposis coli
203532_x_at	425.512	481.925	0.882943	0.0228049	0.1	398.29	457.452	1.14854	0.0363244		CUL5	AF017061	cullin 5
203536_s_at	330.237	364.244	0.906638	0.00683828	0.031	346.723	370.915	1.06977	0.173403	#	CIAO1	NM_004804	WD40 protein Ciao1
203548_s_at	679.121	1089.96	0.623068	0.0159467	0	589.361	1026.33	1.74143	0.00304878		LPL	BF672975	lipoprotein lipase
203549_s_at	1105.35	1679.61	0.658097	0.0128267	0.074	983.92	1578.15	1.60394	0.00275581		LPL	NM_000237	lipoprotein lipase
203558_at	556.89	486.937	1.14366	0.0272003	0.025	538.966	507.032	0.940749	0.208956	#	CUL7	NM_014780	cullin 7
203572_s_at	576.664	623.718	0.924559	0.0444583	0.022	610.806	611.908	1.0018	0.938162	#	TAF6	NM_005641	TAF6 RNA polymerase II, TATA box binding protein (TBP)-associated factor, 80kDa
203609_s_at	423.196	485.786	0.871157	0.0282963	0.075	406.252	472.897	1.16405	0.0389037		ALDH5A1	NM_001080	aldehyde dehydrogenase 5 family, member A1 (succinate-semialdehyde dehydrogenase)
203630_s_at	509.661	550.311	0.926133	0.041207	0.005	498.742	541.418	1.08557	0.0935498	#	COG5	NM_006348	component of oligomeric golgi complex 5
203633_at	402.186	353.719	1.13702	0.0237558	0.007	365.864	353.26	0.96555	0.494554	#	CPT1A	BF001714	carnitine palmitoyltransferase 1A (liver)
203648_at	755.087	685.388	1.10169	0.00529425	0.017	765.835	667.757	0.871934	0.000103499		TATDN2	NM_014760	TatD DNase domain containing 2
203658_at	878.229	762.853	1.15124	0.0242048	0.016	826.365	736.476	0.891224	0.118485	#	SLC25A20	BC001689	solute carrier family 25 (carnitine/acylcarnitine translocase), member 20
203671_at	311.848	296.738	1.05092	0.0194258	0.043	304.85	290.969	0.954465	0.196895	#	TPMT	BF196891	thiopurine S-methyltransferase
203678_at	861.328	1111.06	0.77523	0.0410087	0.045	906.821	1007.54	1.11106	0.234123	#	KIAA1018	NM_014967	KIAA1018 protein
203682_s_at	1083.99	1249.97	0.867212	0.0347405	0.071	1098.42	1205.97	1.09792	0.0379889		IVD	NM_002225	isovaleryl Coenzyme A dehydrogenase
203686_at	516.465	464.313	1.11232	0.0122071	0.059	494.704	466.237	0.942456	0.226193	#	MPG	NM_002434	N-methylpurine-DNA glycosylase
203705_s_at	371.643	462.619	0.803346	0.00165715	0.04	403.172	449.053	1.1138	0.0412336		FZD7	AI333651	frizzled homolog 7 (Drosophila)
203706_s_at	485.417	615.696	0.788404	0.00755208	0.069	514.361	608.51	1.18304	0.0753434	#	FZD7	NM_003507	frizzled homolog 7 (Drosophila)
203718_at	664.064	591.139	1.12336	0.0106609	0.04	662.604	595.595	0.898871	0.0165115		NTE	NM_006702	neuropathy target esterase
203747_at	701.938	584.155	1.20163	0.018182	0	726.331	565.898	0.779119	1.44244e-05		AQP3	NM_004925	aquaporin 3
203771_s_at	708.963	533.172	1.32971	0.00346565	0.029	724.755	516.224	0.712274	5.04293e-05		BLVRA	AA740186	biliverdin reductase A
203804_s_at	490.234	592.053	0.828024	0.0413784	0.014	526.081	615.253	1.1695	0.106717	#	CROP	NM_006107	cisplatin resistance-associated overexpressed protein
203855_at	790.86	937.716	0.843389	0.0277796	0.025	748.89	917.813	1.22556	0.0119594		KIAA0893	NM_014969	KIAA0893 protein
203870_at	713.998	833.463	0.856664	0.00730611	0.024	751.89	837.238	1.11351	0.0872466	#	USP46	BE856374	ubiquitin specific protease 46
203899_s_at	364.495	345.288	1.05563	0.0204888	0.131	355.156	342.593	0.964626	0.0847789	#	RCP9	NM_014478	calcitonin gene-related peptide-receptor component protein
203950_s_at	378.072	331.205	1.1415	0.0317033	0.056	365.558	309.442	0.846494	0.000913129		CLCN6	NM_001286	chloride channel 6
203958_s_at	380.474	322.69	1.17907	0.000876966	0.067	357.344	315.587	0.883145	0.0134333		KIAA0478	AI557467	KIAA0478 gene product
203973_s_at	870.715	609.278	1.42909	0.0326737	0.068	509.078	588.492	1.15599	0.361158	#	CEBPD	NM_005195	CCAAT/enhancer binding protein (C/EBP), delta
204037_at	480.918	434.053	1.10797	0.004919	0.029	468.414	432.924	0.924234	0.0810778	#	EDG2	BF055366	endothelial differentiation, lysophosphatidic acid G-protein-coupled receptor, 2
204049_s_at	297.051	346.909	0.856279	0.0333039	0.066	292.483	351.587	1.20208	0.00516895		PHACTR2	NM_014721	phosphatase and actin regulator 2
204067_at	608.135	717.587	0.847472	0.00143894	0.018	628.923	698.012	1.10985	0.044852		SUOX	AA129776	sulfite oxidase
204074_s_at	662.288	581.187	1.13954	0.00417349	0.051	649.607	570.543	0.87829	0.00135664		KIAA0562	AI936976	Glycine-, glutamate-, thienylcyclohexylpiperidine-binding protein
204079_at	282.738	328.735	0.860077	0.0360863	0.024	294.99	307.265	1.04161	0.627376	#	TPST2	NM_003595	tyrosylprotein sulfotransferase 2
204089_x_at	402.182	446.423	0.900898	0.00220496	0.006	410.031	465.924	1.13631	0.000431386		MAP3K4	NM_006724	mitogen-activated protein kinase kinase kinase 4
204147_s_at	375.38	351.996	1.06643	0.0488725	0.029	365.597	348.915	0.95437	0.245326	#	TFDP1	NM_007111	transcription factor Dp-1
204158_s_at	398.656	334.847	1.19056	0.0218623	0.068	364.637	340.086	0.93267	0.274368	#	TCIRG1	NM_006019	T-cell, immune regulator 1, ATPase, H+ transporting, lysosomal V0 protein a isoform 3
204159_at	278.203	377.295	0.737363	0.00225384	0.037	271.393	391.978	1.44432	0.00102106		CDKN2C	NM_001262	cyclin-dependent kinase inhibitor 2C (p18, inhibits CDK4)
204161_s_at	343.197	400.682	0.856532	0.0134717	0.062	356.037	381.877	1.07258	0.301361	#	ENPP4	NM_014936	ectonucleotide pyrophosphatase/phosphodiesterase 4 (putative function)
204186_s_at	596.416	684.773	0.870969	0.0398742	0.063	622.717	693.693	1.11398	0.137036	#	PPID	AI014573	peptidylprolyl isomerase D (cyclophilin D)
204218_at	751.51	685.279	1.09665	0.0268656	0.004	711.206	666.128	0.936618	0.234999	#	DKFZP564M082	NM_014042	DKFZP564M082 protein
204263_s_at	733.795	631.092	1.16274	0.00606199	0.071	703.402	608.846	0.865574	0.00456212		CPT2	M58581	carnitine palmitoyltransferase II
204290_s_at	626.326	874.509	0.716203	0.0023681	0.03	624.238	879.482	1.40889	0.000678666		ALDH6A1	NM_005589	aldehyde dehydrogenase 6 family, member A1
204300_at	677.159	593.544	1.14087	0.02431	0.01	647.429	618.142	0.954764	0.349272	#	PET112L	NM_004564	PET112-like (yeast)
204310_s_at	342.235	425.768	0.803807	0.00772924	0.054	354.624	415.455	1.17154	0.0739907	#	NPR2	NM_003995	natriuretic peptide receptor B/guanylate cyclase B (atrionatriuretic peptide receptor B)
204313_s_at	350.752	403.053	0.870239	0.0431045	0.019	351.09	385.483	1.09796	0.0417497		CREB1	AA161486	cAMP responsive element binding protein 1
204314_s_at	304.372	351.298	0.866419	0.0194277	0.044	298.299	356.621	1.19552	0.000855905		CREB1	NM_004379	cAMP responsive element binding protein 1
204364_s_at	483.901	568.423	0.851304	0.00569648	0.006	520.285	574.049	1.10334	0.0529625	#	C2orf23	BE535746	chromosome 2 open reading frame 23
204401_at	564.645	466.165	1.21126	0.0442188	0.029	528.632	465.983	0.881488	0.0754616	#	KCNN4	NM_002250	potassium intermediate/small conductance calcium-activated channel, subfamily N, member 4
204416_x_at	377.763	351.355	1.07516	0.0217735	0.012	377.348	352.723	0.93474	0.0303376		APOC1	NM_001645	apolipoprotein C-I
204425_at	324.103	292.285	1.10886	0.0140064	0.077	325.614	290.196	0.891226	0.0126917		ARHGAP4	NM_001666	Rho GTPase activating protein 4
204509_at	390.394	362.16	1.07796	0.0358138	0.059	389.63	356.955	0.91614	0.022582		CA12	NM_017689	carbonic anhydrase XII
204546_at	312.117	327.475	0.953103	0.0306271	0	330.802	316.652	0.957226	0.198096	#	KIAA0513	NM_014732	KIAA0513
204555_s_at	344.665	305.783	1.12716	0.0267691	0.01	318.009	303.709	0.955034	0.381003	#	PPP1R3D	NM_006242	protein phosphatase 1, regulatory subunit 3D
204558_at	818.136	700.592	1.16778	0.0360214	0.031	730.386	717.138	0.981861	0.808309	#	RAD54L	NM_003579	RAD54-like (S. cerevisiae)
204594_s_at	337.816	423.245	0.798157	0.0144264	0.051	360.548	435.325	1.2074	0.0236287		FLJ20232	NM_013298	hypothetical protein FLJ20232
204598_at	568.163	504.172	1.12692	0.00189811	0	559.729	509.075	0.909503	0.0142231		UBCE7IP5	NM_014948	likely ortholog of mouse ubiquitin conjugating enzyme 7 interacting protein 5
204648_at	579.398	511.888	1.13188	0.00600448	0.036	569.806	514.779	0.903428	0.00328028		NPR1	NM_000906	natriuretic peptide receptor A/guanylate cyclase A (atrionatriuretic peptide receptor A)
204658_at	356.757	543.841	0.655995	0.028027	0.022	379.688	529.349	1.39417	0.0499332		TRA2A	NM_013293	transformer-2 alpha
204729_s_at	325.488	280.134	1.1619	0.0269696	0.062	307.887	272.245	0.884236	0.020274		STX1A	NM_004603	syntaxin 1A (brain)
204773_at	337.258	383.774	0.878792	0.0278027	0.047	356.925	390.905	1.0952	0.165332	#	IL11RA	NM_004512	interleukin 11 receptor, alpha
204826_at	669.176	588.525	1.13704	0.0337622	0.067	622.762	584.476	0.938521	0.155813	#	CCNF	NM_001761	cyclin F
204839_at	329.931	381.45	0.86494	0.0160815	0	354.672	376.537	1.06165	0.0350852		POP5	NM_015918	processing of precursor 5, ribonuclease P/MRP subunit (S. cerevisiae)
204858_s_at	344.482	310.709	1.1087	0.0379904	0.013	346.839	319.238	0.920423	0.0216421		ECGF1	NM_001953	endothelial cell growth factor 1 (platelet-derived)
204876_at	340.283	313.909	1.08402	0.0494761	0.056	327.186	308.118	0.941722	0.196735	#	KIAA0296	NM_014699	KIAA0296 gene product
204879_at	422.461	371.684	1.13661	0.00610872	0.008	426.638	359.47	0.842565	0.00589144		T1A-2	NM_006474	lung type-I cell membrane-associated glycoprotein
204934_s_at	357.947	321.674	1.11276	0.0313151	0.013	355.391	318.913	0.897357	0.136522	#	HPN	NM_002151	hepsin (transmembrane protease, serine 1)
204969_s_at	362.709	435.44	0.832973	0.00143818	0	370.222	430.652	1.16323	0.00597053		RDX	NM_002906	radixin
204973_at	334.711	310.373	1.07841	0.0401749	0.023	336.297	309.265	0.91962	0.0511014	#	GJB1	NM_000166	gap junction protein, beta 1, 32kDa (connexin 32, Charcot-Marie-Tooth neuropathy, X-linked)
204990_s_at	427.37	383.686	1.11385	0.0130413	0.02	424.275	378.164	0.891319	0.0175014		ITGB4	NM_000213	integrin, beta 4
205018_s_at	537.746	618.6	0.869295	0.00546231	0.052	569.133	646.089	1.13522	0.0172906		MBNL2	NM_005757	muscleblind-like 2 (Drosophila)
205074_at	307.912	347.497	0.886086	0.0466763	0.019	324.511	340.614	1.04962	0.338101	#	SLC22A5	NM_003060	solute carrier family 22 (organic cation transporter), member 5
205115_s_at	531.362	483.678	1.09859	0.0218613	0.022	510.858	462.488	0.905317	0.00854501		RBM19	NM_016196	RNA binding motif protein 19
205117_at	323.769	307.874	1.05163	0.0456282	0.044	312.207	301.035	0.964217	0.222977	#	FGF1	X59065	fibroblast growth factor 1 (acidic)
205133_s_at	1018.75	1163.74	0.875414	0.0479743	0.035	1066.08	1289.46	1.20953	0.069106	#	HSPE1	NM_002157	heat shock 10kDa protein 1 (chaperonin 10)
205178_s_at	290.9	359.046	0.810204	0.0094444	0.045	304.437	353.721	1.16189	0.0131571		RBBP6	NM_006910	retinoblastoma binding protein 6
205181_at	497.454	413.217	1.20386	0.00328142	0.036	489.844	398.875	0.814291	0.000211907		ZNF193	NM_006299	zinc finger protein 193
205208_at	584.172	655.551	0.891116	0.0458265	0.026	567.132	686.613	1.21068	0.0426144		FTHFD	NM_012190	formyltetrahydrofolate dehydrogenase
205228_at	475.163	669.639	0.709581	0.041382	0.03	522.16	657.885	1.25993	0.132613	#	RBMS2	NM_002898	RNA binding motif, single stranded interacting protein 2
205230_at	861.987	749.442	1.15017	0.0187329	0	825.949	722.054	0.874211	0.075102	#	RPH3A	NM_014954	rabphilin 3A homolog (mouse)
205245_at	354.781	322.709	1.09938	0.035756	0.063	342.146	319.582	0.934052	0.189776	#	PARD6A	NM_016948	par-6 partitioning defective 6 homolog alpha (C.elegans)
205247_at	371.88	505.515	0.735645	0.0156549	0.07	397.979	489.108	1.22898	0.0678868	#	NOTCH4	AI743713	Notch homolog 4 (Drosophila)
205324_s_at	375.611	417.385	0.899913	0.0322112	0.051	385.766	401.803	1.04157	0.365853	#	FTSJ1	NM_012280	FtsJ homolog 1 (E. coli)
205359_at	346.108	377.484	0.91688	0.0348927	0.039	379.44	390.67	1.0296	0.725386	#	AKAP6	NM_004274	A kinase (PRKA) anchor protein 6
205369_x_at	318.143	348.354	0.913275	0.0236259	0.033	323.619	347.385	1.07344	0.0434881		DBT	J03208	dihydrolipoamide branched chain transacylase (E2 component of branched chain keto acid dehydrogenase complex; maple syrup urine disease)
205377_s_at	600.645	726.333	0.826956	0.0411027	0.035	708.072	729.047	1.02962	0.814599	#	ACHE	AI190022	acetylcholinesterase (YT blood group)
205391_x_at	3124.69	3648.99	0.856315	0.0371134	0.042	3505.49	3939.42	1.12379	0.237469	#	ANK1	M28880	ankyrin 1, erythrocytic /// ankyrin 1, erythrocytic
205405_at	385.451	351.11	1.09781	0.00306277	0.036	375.669	333.99	0.889053	0.00074081		SEMA5A	NM_003966	sema domain, seven thrombospondin repeats (type 1 and type 1-like), transmembrane domain (TM) and short cytoplasmic domain, (semaphorin) 5A
205424_at	925.548	1111.26	0.832881	0.0402379	0.009	942.014	1124.16	1.19336	0.0314305		ProSAPiP2	NM_014726	ProSAPiP2 protein
205454_at	756.692	571.686	1.32362	0.0433029	0.017	653.376	603.009	0.922913	0.38954	#	HPCA	BC001777	hippocalcin
205508_at	2250.9	2537.54	0.887039	0.0367444	0.022	2361.73	2603.7	1.10245	0.231428	#	SCN1B	NM_001037	sodium channel, voltage-gated, type I, beta
205545_x_at	750.991	820.444	0.915348	0.0126736	0.013	744.516	818.312	1.09912	0.0196903		DNAJC8	NM_014280	DnaJ (Hsp40) homolog, subfamily C, member 8
205601_s_at	823.282	652.169	1.26238	0.0329743	0.037	808.481	618.389	0.764878	0.00354707		HOXB5	NM_002147	homeo box B5
205622_at	611.782	485.805	1.25932	0.000982808	0.063	568.962	472.325	0.830153	0.000916904		SMPD2	NM_003080	sphingomyelin phosphodiesterase 2, neutral membrane (neutral sphingomyelinase)
205633_s_at	854.791	1096.68	0.779437	0.00483353	0.034	967.372	1134.64	1.17291	0.0891279	#	ALAS1	NM_000688	aminolevulinate, delta-, synthase 1
205780_at	1032.06	903.385	1.14243	0.0134236	0.085	996.956	872.714	0.875378	0.090865	#	BIK	NM_001197	BCL2-interacting killer (apoptosis-inducing)
205806_at	420.759	376.49	1.11758	0.019169	0.05	433.327	378.168	0.87271	0.0105301		ROM1	NM_000327	retinal outer segment membrane protein 1
205875_s_at	537.987	491.993	1.09348	0.0120319	0	527.996	499.614	0.946244	0.177385	#	TREX1	NM_016381	three prime repair exonuclease 1
205905_s_at	489.949	872.762	0.561378	0.0151018	0.01	559.658	884.842	1.58104	0.0293667		MICA /// MICB	NM_000247	MHC class I polypeptide-related sequence A /// MHC class I polypeptide-related sequence B
205906_at	363.241	328.245	1.10662	0.0254605	0.054	346.871	330.021	0.951421	0.288783	#	FOXJ1	NM_001454	forkhead box J1
205961_s_at	374.101	423.593	0.883161	0.009284	0.049	367.07	424.957	1.1577	0.00269804		PSIP1	NM_004682	PC4 and SFRS1 interacting protein 1
205986_at	758.987	678.375	1.11883	0.00587431	0.003	706.395	638.384	0.903722	0.0615626	#	AATK	NM_004920	apoptosis-associated tyrosine kinase
206009_at	389.046	340.388	1.14295	0.00145115	0.016	366.603	331.962	0.905507	0.0193743		ITGA9	NM_002207	integrin, alpha 9
206020_at	267.476	473.548	0.564835	0.0249142	0.001	316.288	471.087	1.48943	0.0523479	#	SOCS6	NM_016387	suppressor of cytokine signaling 6
206046_at	795.006	699.492	1.13655	0.0112618	0.024	768.41	682.4	0.888068	0.0127091		ADAM23	NM_003812	a disintegrin and metalloproteinase domain 23
206055_s_at	383.452	487.793	0.786097	0.0325848	0.06	443.872	528.614	1.19092	0.184288	#	SNRPA1	NM_003090	small nuclear ribonucleoprotein polypeptide A'
206063_x_at	527.63	484.491	1.08904	0.0245922	0.028	510.8	480.949	0.941561	0.138565	#	PPIL2	BF001594	peptidylprolyl isomerase (cyclophilin)-like 2
206076_at	299.082	320.009	0.934606	0.0472837	0.016	304.351	306.584	1.00734	0.822396	#	B7	NM_006992	B7 gene
206078_at	449.423	359.334	1.25071	0.00108737	0.05	454.189	370.617	0.815998	0.0114254		TRAD	NM_007064	serine/threonine kinase with Dbl- and pleckstrin homology domains
206087_x_at	528.4	490.9	1.07639	0.0197999	0.091	521.88	502.457	0.962783	0.190373	#	HFE	NM_000410	hemochromatosis
206092_x_at	458.174	417.603	1.09715	0.0298115	0.023	452.823	408.728	0.902621	0.00790537		RTEL1	NM_016434	regulator of telomere elongation helicase 1
206219_s_at	383.438	352.377	1.08815	0.00577105	0.018	384.805	355.865	0.924794	0.0108329		VAV1	NM_005428	vav 1 oncogene
206234_s_at	324.865	294.427	1.10338	0.00725608	0.068	317.06	288.468	0.909821	0.00480874		MMP17	NM_016155	matrix metalloproteinase 17 (membrane-inserted)
206256_at	342.933	305.029	1.12426	0.0361877	0.038	328.067	293.038	0.893226	0.0149202		CPN1	NM_001308	carboxypeptidase N, polypeptide 1, 50kD
206261_at	256.712	347.591	0.738548	0.0285005	0.042	266.461	329.752	1.23753	0.0942843	#	ZNF239	NM_005674	zinc finger protein 239
206297_at	646.409	919.753	0.702807	0.0118606	0.059	726.107	899.138	1.2383	0.0289448		CTRC	NM_007272	chymotrypsin C (caldecrin)
206299_at	533.663	722.519	0.738615	0.0393114	0.061	536.835	725.009	1.35052	0.0224142		TMEM28	NM_015686	transmembrane protein 28
206360_s_at	538.971	492.068	1.09532	0.0134545	0.058	514.998	474.575	0.921509	0.0311634		SOCS3	NM_003955	suppressor of cytokine signaling 3
206362_x_at	621.022	579.996	1.07073	0.0253519	0.067	613.444	571.838	0.932176	0.00540932		MAP3K10	NM_002446	mitogen-activated protein kinase kinase kinase 10
206372_at	3382.21	2085.61	1.62169	0.023564	0.038	1878.74	1907.82	1.01548	0.92917	#	MYF6	NM_002469	myogenic factor 6 (herculin)
206431_x_at	780.481	708.318	1.10188	0.0345304	0.018	752.51	710.877	0.944675	0.0336315		KIAA0676	NM_015043	KIAA0676 protein
206441_s_at	871.482	726.664	1.19929	0.0196244	0.091	850.512	771.342	0.906915	0.0815313	#	COMMD4	NM_017828	COMM domain containing 4
206463_s_at	386.052	353.812	1.09112	0.0127328	0.04	375.879	345.67	0.919631	0.0867597	#	DHRS2	NM_005794	dehydrogenase/reductase (SDR family) member 2
206467_x_at	533.071	484.892	1.09936	0.0480365	0.042	503.315	481.662	0.956978	0.227234	#	TNFRSF6B /// RTEL1	NM_003823	tumor necrosis factor receptor superfamily, member 6b, decoy /// regulator of telomere elongation helicase 1
206469_x_at	465.127	497.881	0.934212	0.0191554	0.086	477.543	512.067	1.07229	0.0562027	#	AKR7A3	NM_012067	aldo-keto reductase family 7, member A3 (aflatoxin aldehyde reductase)
206510_at	345.63	441.604	0.782669	0.00474181	0.022	400.219	507.8	1.2688	0.075543	#	SIX2	AF332197	sine oculis homeobox homolog 2 (Drosophila)
206511_s_at	301.247	336.563	0.895071	0.0477362	0.061	314.647	354.015	1.12512	0.132319	#	SIX2	NM_016932	sine oculis homeobox homolog 2 (Drosophila)
206635_at	561.083	529.558	1.05953	0.0122789	0.046	551.612	523.756	0.949501	0.00989435		CHRNB2	NM_000748	cholinergic receptor, nicotinic, beta polypeptide 2 (neuronal)
206657_s_at	554.308	661.087	0.83848	0.0249831	0.017	680.762	732.612	1.07616	0.298765	#	MYOD1	NM_002478	myogenic factor 3
206681_x_at	472.953	722.322	0.654768	0.0138676	0	518.597	719.172	1.38676	0.0248627		GP2	NM_001502	glycoprotein 2 (zymogen granule membrane)
206694_at	320.44	288.162	1.11202	0.00218659	0.105	309.145	284.298	0.919626	0.0114773		PNLIPRP1	NM_006229	pancreatic lipase-related protein 1
206739_at	320.776	289.928	1.1064	0.00767961	0.069	303.868	286.087	0.941484	0.0382278		HOXC5	NM_018953	homeo box C5
206745_at	501.375	461.008	1.08756	0.0061697	0.039	471.524	454.048	0.962937	0.237953	#	HOXC11	NM_014212	homeo box C11
206757_at	270.044	399.377	0.676164	0.0342196	0.026	299.281	384.905	1.2861	0.0645573	#	PDE5A	NM_001083	phosphodiesterase 5A, cGMP-specific
206767_at	353.53	394.024	0.897228	0.0450622	0.096	354.729	418.716	1.18038	0.0754024	#	RBMS3	NM_014483	RNA binding motif, single stranded interacting protein
206802_at	327.34	310.461	1.05437	0.0457597	0.062	318.476	311.467	0.977993	0.423749	#	PAX5	NM_016734	paired box gene 5 (B-cell lineage specific activator)
206811_at	268.257	359.884	0.745398	0.0100666	0.064	281.847	345.547	1.22601	0.0726667	#	ADCY8	NM_001115	adenylate cyclase 8 (brain)
206867_at	357.433	330.094	1.08282	0.0126916	0.039	356.75	332.327	0.93154	0.061408	#	GCKR	NM_001486	glucokinase (hexokinase 4) regulator
206883_x_at	355.375	323.727	1.09776	0.00498881	0.042	350.151	315.888	0.902147	0.0104315		GP9	NM_000174	glycoprotein IX (platelet)
206901_at	352.387	332.57	1.05959	0.044616	0.085	350.594	329.635	0.94022	0.0103132		MGC11271	NM_024323	hypothetical protein MGC11271
206949_s_at	531.598	575.624	0.923515	0.0237777	0	547.121	566.765	1.0359	0.286817	#	RUSC1	NM_014328	RUN and SH3 domain containing 1
206973_at	409.478	362.993	1.12806	0.0361087	0	396.294	353.041	0.890857	0.0879728	#	PPFIA2	NM_003625	protein tyrosine phosphatase, receptor type, f polypeptide (PTPRF), interacting protein (liprin), alpha 2
206976_s_at	362.642	498.85	0.726957	0.00058444	0.021	439.084	564.076	1.28466	0.0077897		HSPH1	NM_006644	heat shock 105kDa/110kDa protein 1
207000_s_at	1187.19	961.929	1.23418	0.000124549	0.044	1063.77	920.312	0.865144	0.0102701		PPP3CC	NM_005605	protein phosphatase 3 (formerly 2B), catalytic subunit, gamma isoform (calcineurin A gamma)
207001_x_at	402.874	340.685	1.18254	0.0451054	0.092	336.562	330.827	0.982961	0.826778	#	DSIPI	NM_004089	delta sleep inducing peptide, immunoreactor
207025_at	456.712	429.577	1.06317	0.0457461	0.022	463.531	435.835	0.940251	0.154303	#	GJA12	NM_020435	gap junction protein, alpha 12, 47kDa
207071_s_at	628.12	687.27	0.913934	0.0428323	0.055	618.323	676.892	1.09472	0.00207074		ACO1	NM_002197	aconitase 1, soluble
207087_x_at	3060.23	3609.26	0.847882	0.0332692	0.045	3437.67	3869	1.12547	0.229306	#	ANK1	NM_020478	ankyrin 1, erythrocytic
207098_s_at	288.933	445.187	0.649014	0.0147889	0.028	338.514	433.634	1.28099	0.104767	#	MFN1	NM_017927	mitofusin 1
207116_s_at	403.47	348.009	1.15937	0.0207687	0.049	400.032	348.682	0.871636	0.0175403		GAPDS	NM_014364	glyceraldehyde-3-phosphate dehydrogenase, spermatogenic
207122_x_at	384.22	357.719	1.07408	0.00695315	0.017	378.13	355.035	0.938925	0.0435965		SULT1A2	NM_001054	sulfotransferase family, cytosolic, 1A, phenol-preferring, member 2
207136_at	454.562	428.212	1.06154	0.00624076	0.026	455.769	419.868	0.92123	0.00191897		ARR3	NM_004312	arrestin 3, retinal (X-arrestin)
207169_x_at	531.809	626.73	0.848546	0.00229656	0.057	562.324	606.8	1.07909	0.135266	#	DDR1	NM_001954	discoidin domain receptor family, member 1
207184_at	630.193	574.466	1.09701	0.0356072	0.03	572.122	564.573	0.986805	0.655036	#	SLC6A13	NM_016615	solute carrier family 6 (neurotransmitter transporter, GABA), member 13
207201_s_at	316.721	464.86	0.681325	0.00836315	0.032	353.665	467.625	1.32223	0.0485189		SLC22A1	NM_003057	solute carrier family 22 (organic cation transporter), member 1
207205_at	864.98	727.957	1.18823	0.037021	0.021	837.506	718.79	0.858251	0.00835828		CEACAM4	NM_001817	carcinoembryonic antigen-related cell adhesion molecule 4
207221_at	328.003	576.685	0.568773	0.0129667	0.062	362.723	594.753	1.63969	0.0157307		F2RL3	NM_003950	coagulation factor II (thrombin) receptor-like 3
207230_at	424.135	388.626	1.09137	0.0304271	0.036	421.292	370.714	0.879945	0.00963428		CDON	NM_016952	cell adhesion molecule-related/down-regulated by oncogenes
207316_at	450.031	500.48	0.899199	0.0412104	0.048	466.108	502.198	1.07743	0.0506996	#	HAS1	NM_001523	hyaluronan synthase 1
207332_s_at	970.984	1638.35	0.592661	0.0141908	0.044	1227.66	1532.59	1.24838	0.297789	#	TFRC	NM_003234	transferrin receptor (p90, CD71)
207349_s_at	1670.05	825.939	2.022	0.00315225	0.032	839.083	649.178	0.773675	0.181134	#	UCP3	NM_022803	uncoupling protein 3 (mitochondrial, proton carrier)
207412_x_at	415.089	368.44	1.12661	0.0387761	0.046	401.83	362.178	0.901321	0.0500973	#	CELP	NM_001808	carboxyl ester lipase pseudogene
207436_x_at	2311.02	1711.39	1.35038	0.00620919	0.058	2200.23	1780.09	0.809046	0.00130104		KIAA0894	NM_014896	KIAA0894 protein
207537_at	472.944	514.22	0.919732	0.0430686	0.05	467.052	506.492	1.08445	0.164257	#	PFKFB1	NM_002625	6-phosphofructo-2-kinase/fructose-2,6-biphosphatase 1
207545_s_at	262.163	464.901	0.563912	0.00490126	0.036	300.697	489.36	1.62742	0.0170776		NUMB	NM_003744	numb homolog (Drosophila)
207547_s_at	409.264	363.91	1.12463	0.0483306	0.036	394.391	336.333	0.852791	0.00228524		TU3A	NM_007177	TU3A protein
207573_x_at	3188.93	3506.18	0.909516	0.0227403	0.063	3203.3	3496.59	1.09156	0.141721	#	ATP5L	NM_006476	ATP synthase, H+ transporting, mitochondrial F0 complex, subunit g
207618_s_at	866.972	630.808	1.37438	0.00259928	0.059	789.409	661.54	0.838019	0.0639596	#	BCS1L	NM_004328	BCS1-like (yeast)
207760_s_at	1738.9	2089.47	0.832218	0.00362894	0	1998.97	2303.67	1.15243	0.0133388		NCOR2	NM_006312	nuclear receptor co-repressor 2
207791_s_at	318.878	353.655	0.901664	0.00176745	0.036	367.326	380.719	1.03646	0.653738	#	RAB1A	NM_004161	RAB1A, member RAS oncogene family
207877_s_at	386.991	342.174	1.13098	0.0133353	0.019	367.817	326.389	0.887368	0.0695422	#	NVL	NM_002533	nuclear VCP-like
207980_s_at	984.214	436.499	2.25479	0.0385187	0.012	445.798	398.738	0.894436	0.612252	#	CITED2	NM_006079	Cbp/p300-interacting transactivator, with Glu/Asp-rich carboxy-terminal domain, 2
207981_s_at	372.864	436.794	0.853638	0.035297	0.054	362.484	432.245	1.19245	0.00253428		ESRRG	NM_001438	estrogen-related receptor gamma
207993_s_at	293.262	383.616	0.764467	0.00872838	0.01	305.374	390.658	1.27928	0.0259119		CHP	NM_007236	calcium binding protein P22
207999_s_at	471.229	560.154	0.841251	0.0295805	0.06	479.428	564.316	1.17706	0.0212583		ADARB1	NM_001112	adenosine deaminase, RNA-specific, B1 (RED1 homolog rat)
208014_x_at	470.063	774.351	0.607042	0.0135388	0.068	509.534	766.014	1.50336	0.031086		AD7C-NTP	NM_014486	neuronal thread protein AD7c-NTP
208037_s_at	419.166	388.167	1.07986	0.00672903	0.06	406.842	393	0.965976	0.330638	#	MADCAM1	NM_007164	mucosal vascular addressin cell adhesion molecule 1
208053_at	253.221	390.033	0.649229	0.0262952	0.031	257.163	406.684	1.58142	0.0227059		GUCY2F	NM_001522	guanylate cyclase 2F, retinal
208060_at	682.528	571.017	1.19528	0.00499408	0	634.255	573.127	0.903623	0.00184322		PAX7	NM_002584	paired box gene 7
208093_s_at	412.589	448.409	0.920117	0.0217029	0.04	429.594	460.106	1.07102	0.015962		NDEL1	NM_030808	nudE nuclear distribution gene E homolog like 1 (A. nidulans) /// nudE nuclear distribution gene E homolog like 1 (A. nidulans)
208127_s_at	293.591	352.108	0.833809	0.00112075	0	318.287	370.865	1.16519	0.00043882		SOCS5	NM_014011	suppressor of cytokine signaling 5
208176_at	592.507	550.021	1.07724	0.0244519	0.021	574.495	541.666	0.942856	0.0857081	#	DUX1	NM_012146	double homeobox, 1
208352_x_at	3127.29	3661.14	0.854183	0.0418462	0.068	3496.14	3994.35	1.1425	0.171843	#	ANK1	NM_020479	ankyrin 1, erythrocytic
208353_x_at	3066.84	3545.17	0.865074	0.0485771	0.052	3401.96	3850.1	1.13173	0.211418	#	ANK1	NM_020480	ankyrin 1, erythrocytic
208369_s_at	382.272	437.148	0.874468	0.0119452	0.048	379.769	431.136	1.13526	0.00959138		GCDH	NM_013976	glutaryl-Coenzyme A dehydrogenase
208373_s_at	470.416	441.125	1.0664	0.0175505	0.067	471.332	436.194	0.92545	0.0589717	#	P2RY6	NM_004154	pyrimidinergic receptor P2Y, G-protein coupled, 6
208404_x_at	626.667	579.116	1.08211	0.0404871	0.03	604.744	585.358	0.967944	0.489168	#	---	NM_000890	---
208424_s_at	397.635	627.528	0.633652	0.0150114	0	458.568	634.759	1.38422	0.064455	#	CIAPIN1	NM_020313	cytokine induced apoptosis inhibitor 1
208445_s_at	434.597	485.304	0.895515	0.018496	0.065	447.341	477.299	1.06697	0.196506	#	BAZ1B	NM_023005	bromodomain adjacent to zinc finger domain, 1B
208454_s_at	517.031	354.742	1.45748	1.6072e-06	0.045	540.268	369.892	0.684646	0.000696599		PGCP	NM_016134	plasma glutamate carboxypeptidase
208485_x_at	548.539	591.639	0.927152	0.0156607	0.045	553.644	575.659	1.03976	0.196288	#	CFLAR	NM_003879	CASP8 and FADD-like apoptosis regulator
208516_at	370.056	334.485	1.10634	0.0163093	0.045	349.28	317.029	0.907662	0.0208708		MTNR1B	NM_005959	melatonin receptor 1B
208532_x_at	550.995	506.285	1.08831	0.00966792	0.048	550.604	504.767	0.916751	0.000141448		UHSKerB	NM_021046	keratin, ultrahigh sulfur, B
208583_x_at	583.814	501.738	1.16359	0.00123171	0.058	580.274	482.713	0.831871	0.000208114		HIST1H2AJ	NM_021066	histone 1, H2aj
208594_x_at	439.109	400.687	1.09589	0.012715	0.014	433.964	394.85	0.909867	0.0246866		ILT8	NM_024318	leukocyte immunoglobulin-like receptor, subfamily B (with TM and ITIM domains), member 6
208609_s_at	568	528.563	1.07461	0.0433495	0.076	562.069	516.824	0.919501	0.0798822	#	TNXB	NM_019105	tenascin XB /// tenascin XB
208652_at	952.632	1103.6	0.863203	0.00234777	0.061	1000.81	1181.59	1.18063	0.00748473		PPP2CA	BC000400	protein phosphatase 2 (formerly 2A), catalytic subunit, alpha isoform
208691_at	1150.06	2084.99	0.551589	0.0113265	0.046	1455.41	1905.77	1.30944	0.281028	#	---	BC001188	---
208698_s_at	471.078	498.186	0.945586	0.0419415	0.072	506.218	530.927	1.04881	0.407831	#	NONO	L14599	non-POU domain containing, octamer-binding
208707_at	324.973	354.449	0.91684	0.0132853	0.039	350.992	358.688	1.02193	0.344621	#	EIF5	BE552334	eukaryotic translation initiation factor 5
208717_at	1717.88	1921.41	0.894069	0.028997	0.052	1625.13	1916.96	1.17957	0.00471254		OXA1L	BC001669	oxidase (cytochrome c) assembly 1-like
208725_at	362.322	391.406	0.925696	0.0492866	0.041	368.342	379.67	1.03075	0.352515	#	EIF2S2	AL031668	Eukaryotic translation initiation factor 2, subunit 2 beta, 38kDa
208746_x_at	4012.2	4355.08	0.921268	0.038421	0.016	4055.45	4327.77	1.06715	0.292336	#	ATP5L	AF070655	ATP synthase, H+ transporting, mitochondrial F0 complex, subunit g
208751_at	579.462	616.714	0.939595	0.0434688	0.058	592.374	630.734	1.06476	0.242014	#	NAPA	BC001165	N-ethylmaleimide-sensitive factor attachment protein, alpha
208773_s_at	297.531	354.324	0.839713	0.00102478	0.046	289.859	356.16	1.22874	6.14069e-05		ANKHD1 /// MASK-BP3	AL136943	ankyrin repeat and KH domain containing 1 /// MASK-4E-BP3 alternate reading frame gene
208776_at	426.754	461.917	0.923875	0.0449559	0.005	441.584	450.643	1.02051	0.624475	#	PSMD11	BF432873	proteasome (prosome, macropain) 26S subunit, non-ATPase, 11
208794_s_at	368.382	392.715	0.938037	0.0465785	0.019	399.442	404.986	1.01388	0.813525	#	SMARCA4	D26156	SWI/SNF related, matrix associated, actin dependent regulator of chromatin, subfamily a, member 4
208817_at	459.649	429.594	1.06996	0.047108	0.056	463.107	428.219	0.924666	0.0451902		COMT	BC000419	catechol-O-methyltransferase
208820_at	426.385	480.956	0.886536	0.00137296	0.018	438.267	505.081	1.15245	0.00010572		PTK2	AL037339	PTK2 protein tyrosine kinase 2
208821_at	591.894	536.827	1.10258	0.0364898	0.017	624.633	547.453	0.87644	0.193224	#	SNRPB	J04564	small nuclear ribonucleoprotein polypeptides B and B1
208840_s_at	441.036	551.905	0.799115	0.0352661	0.036	482.666	574.85	1.19099	0.0632843	#	G3BP2	AU149503	Ras-GTPase activating protein SH3 domain-binding protein 2
208867_s_at	613.605	707.416	0.86739	0.0363999	0.048	684.689	731.001	1.06764	0.344539	#	CSNK1A1	AF119911	Casein kinase 1, alpha 1
208886_at	2071.28	1621.05	1.27774	0.0497899	0.026	2201.83	1895.09	0.860688	0.287936	#	H1F0	BC000145	H1 histone family, member 0
208899_x_at	642.326	709.192	0.905715	0.0458978	0.069	617.341	706.449	1.14434	0.00367664		ATP6V1D	AF100741	ATPase, H+ transporting, lysosomal 34kDa, V1 subunit D
208903_at	380.99	364.725	1.0446	0.0408406	0.06	380.413	366.976	0.964677	0.309907	#	RPS28	BF431363	ribosomal protein S28
208904_s_at	8402.71	8888.28	0.945369	0.0206688	0.055	8407.36	8841.78	1.05167	0.0153193		RPS28	BC000354	ribosomal protein S28
208905_at	5874.43	6616.82	0.887803	0.0483927	0.047	6169.67	6463.77	1.04767	0.500144	#	CYCS	BC005299	cytochrome c, somatic
208919_s_at	518.006	435.021	1.19076	0.0238085	0.049	499.043	426.364	0.854364	0.0213425		FLJ13052	BC001709	NAD kinase
208932_at	467.502	440.796	1.06059	0.0185609	0.03	479.416	447.934	0.934334	0.0870517	#	PPP4C	BC001416	protein phosphatase 4 (formerly X), catalytic subunit
208947_s_at	511.006	480.623	1.06322	0.0472302	0	525.614	474.365	0.902497	0.00666711		RENT1	U59323	regulator of nonsense transcripts 1
208969_at	2090.98	2288.36	0.913743	0.0503583	0	2080.68	2190.83	1.05294	0.365954	#	NDUFA9	AF050641	NADH dehydrogenase (ubiquinone) 1 alpha subcomplex, 9, 39kDa
208975_s_at	708.306	767.239	0.923188	0.0446974	0.025	716.863	773.518	1.07903	0.191833	#	KPNB1	L38951	karyopherin (importin) beta 1
208977_x_at	920.327	1098.76	0.837609	0.0186347	0.042	1315.51	1363.32	1.03634	0.77047	#	TUBB2	BC004188	tubulin, beta, 2
209031_at	325.707	285.803	1.13962	0.0364844	0.019	515.959	310.919	0.602603	0.251525	#	IGSF4	AL519710	Immunoglobulin superfamily, member 4
209050_s_at	390.704	358.876	1.08869	0.0328959	0.024	388.061	352.105	0.907345	0.00605379		RALGDS	AI421559	ral guanine nucleotide dissociation stimulator
209102_s_at	1092.41	930.948	1.17344	0.00953764	0.024	888.907	893.492	1.00516	0.928667	#	HBP1	AF019214	HMG-box transcription factor 1
209106_at	823.354	921.74	0.89326	0.0484871	0	804.673	916.444	1.1389	0.0254696		NCOA1	BF576458	nuclear receptor coactivator 1
209129_at	548.914	489.39	1.12163	0.0321068	0.09	582.174	482.37	0.828566	0.00119387		TRIP6	AF000974	thyroid hormone receptor interactor 6
209137_s_at	613.736	692.554	0.886191	0.0109789	0.026	629.145	705.347	1.12112	0.00686595		USP10	BC000263	ubiquitin specific protease 10
209147_s_at	832.338	694.699	1.19813	0.0207632	0.039	832.548	669.551	0.804219	0.136636	#	PPAP2A	AB000888	phosphatidic acid phosphatase type 2A
209213_at	402.421	368.936	1.09076	0.0175005	0.036	395.731	368.529	0.931262	0.0864991	#	CBR1	BC002511	carbonyl reductase 1
209230_s_at	761.49	623.748	1.22083	0.0214664	0.038	698.096	592.528	0.848778	0.0554919	#	P8	AF135266	p8 protein (candidate of metastasis 1)
209238_at	312.57	354.791	0.880996	0.0479615	0.017	329.123	346.245	1.05202	0.425486	#	STX3A	BE966922	syntaxin 3A
209268_at	311.88	342.446	0.910742	0.0397399	0.037	317.58	342.106	1.07723	0.0647947	#	VPS45A	AF165513	vacuolar protein sorting 45A (yeast)
209282_at	447.782	398.845	1.1227	0.0127922	0.015	426.969	379.726	0.889353	0.00747094		PRKD2	AF309082	protein kinase D2
209287_s_at	467.531	497.674	0.939433	0.0421477	0.028	461.03	523.689	1.13591	0.124647	#	CDC42EP3	AF104857	CDC42 effector protein (Rho GTPase binding) 3
209322_s_at	1220.05	1071.96	1.13814	0.0100556	0	1225.27	1063.11	0.867654	0.00451355		SH2B	AF227968	SH2-B homolog
209323_at	760.536	859.865	0.884483	0.0175342	0.029	780.611	897.763	1.15008	0.00083821		PRKRIR	AF081567	protein-kinase, interferon-inducible double stranded RNA dependent inhibitor, repressor of (P58 repressor)
209328_x_at	456.473	515.6	0.885323	0.0361641	0	437.802	493.796	1.1279	0.050878	#	MGC2198	AA243508	hypothetical protein MGC2198
209357_at	1411.05	668.212	2.11168	0.0379465	0.053	589.492	627.458	1.0644	0.746217	#	CITED2	AF109161	Cbp/p300-interacting transactivator, with Glu/Asp-rich carboxy-terminal domain, 2
209362_at	447.258	507.853	0.880685	0.0392092	0.006	442.585	494.523	1.11735	0.106384	#	SURB7	AI688580	SRB7 suppressor of RNA polymerase B homolog (yeast)
209364_at	589.89	555.232	1.06242	0.00891654	0.027	584.358	533.14	0.912352	0.0989968	#	BAD	U66879	BCL2-antagonist of cell death
209374_s_at	355.649	310.571	1.14515	0.00208643	0.035	332.976	306.223	0.919655	0.0506284	#	IGHM	BC001872	immunoglobulin heavy constant mu
209384_at	742.245	817.11	0.908378	0.0219511	0.013	741.349	831.204	1.12121	0.00888666		PROSC	AA176833	proline synthetase co-transcribed homolog (bacterial)
209406_at	508.64	663.498	0.766603	0.0110211	0	521.148	703.828	1.35053	0.0208835		BAG2	AF095192	BCL2-associated athanogene 2
209408_at	368.337	333.243	1.10531	0.0100965	0.044	354.907	329.634	0.92879	0.0672964	#	KIF2C	U63743	kinesin family member 2C
209432_s_at	604.845	565.157	1.07022	0.0399647	0.051	612.217	559.5	0.913891	0.000562101		CREB3	AF029674	cAMP responsive element binding protein 3
209437_s_at	449.808	391.465	1.14904	0.00717772	0	410.536	382.372	0.931397	0.191295	#	SPON1	AB051390	spondin 1, extracellular matrix protein
209484_s_at	460.57	509.77	0.903486	0.0469203	0.045	435.549	507.565	1.16535	0.00386132		DC8	AF201941	DKFZP566O1646 protein
209500_x_at	350.413	314.301	1.1149	0.00107496	0.061	335.334	312.788	0.932764	0.084776	#	TNFSF13 /// TNFSF12-TNFSF13	AF114012	tumor necrosis factor (ligand) superfamily, member 13 /// tumor necrosis factor (ligand) superfamily, member 12-member 13
209507_at	405.079	442.074	0.916316	0.0253085	0.052	399.795	427.484	1.06926	0.132783	#	RPA3	BC005264	replication protein A3, 14kDa
209533_s_at	370.18	418.237	0.885096	0.0369541	0.029	373.005	417.824	1.12016	0.139103	#	PLAA	AF145020	phospholipase A2-activating protein
209605_at	536.676	618.645	0.867503	0.0341148	0.037	504.987	584.45	1.15736	0.0206874		TST	D87292	thiosulfate sulfurtransferase (rhodanese)
209623_at	627.851	715.079	0.878016	0.0470905	0.034	635.907	702.953	1.10544	0.0497957		MCCC2	AW439494	methylcrotonoyl-Coenzyme A carboxylase 2 (beta)
209625_at	419.837	377.672	1.11164	0.0492533	0.015	400.178	369.423	0.923145	0.0800269	#	PIGH	BC004100	phosphatidylinositol glycan, class H
209668_x_at	680.733	616.814	1.10363	0.0193416	0.026	758.448	637.615	0.840684	0.262178	#	CES2	D50579	carboxylesterase 2 (intestine, liver)
209678_s_at	487.682	535.917	0.909995	0.0271034	0.001	501.825	534.18	1.06447	0.0839716	#	PRKCI	L18964	protein kinase C, iota
209718_at	473.768	434.753	1.08974	0.0206417	0.071	472.806	427.758	0.904722	0.0195213		384D8-2	BC001298	hypothetical protein 384D8_6
209730_at	563.722	509.93	1.10549	0.0328639	0.067	566.691	496.145	0.875512	0.0197211		SEMA3F	U38276	sema domain, immunoglobulin domain (Ig), short basic domain, secreted, (semaphorin) 3F
209828_s_at	484.347	708.778	0.683354	0.0379157	0.058	519.013	676.877	1.30416	0.0787592	#	IL16	M90391	interleukin 16 (lymphocyte chemoattractant factor)
209848_s_at	363.289	322.672	1.12588	0.0116227	0.06	355.194	318.702	0.897259	0.00753937		SILV	U01874	silver homolog (mouse)
209873_s_at	519.646	474.375	1.09543	0.0214455	0.039	501.6	462.734	0.922515	0.0155354		PKP3	AF053719	plakophilin 3
209877_at	321.026	284.93	1.12668	0.0325205	0	312.019	276.283	0.885467	0.0595257	#	SNCG	AF010126	synuclein, gamma (breast cancer-specific protein 1)
209878_s_at	608.307	530.466	1.14674	0.0232873	0.029	651.28	504.437	0.774531	0.00299566		RELA	M62399	v-rel reticuloendotheliosis viral oncogene homolog A, nuclear factor of kappa light polypeptide gene enhancer in B-cells 3, p65 (avian)
209916_at	394.319	505.475	0.780096	0.00081919	0.041	379.126	498.573	1.31506	0.000901624		DHTKD1	BC002477	dehydrogenase E1 and transketolase domain containing 1
209918_at	412.517	496.058	0.83159	0.0106177	0.043	425.994	489.198	1.14837	0.059553	#	---	J05235	---
209992_at	429.599	560.566	0.766367	0.00606664	0.032	444.994	506.964	1.13926	0.162779	#	PFKFB2	AB044805	6-phosphofructo-2-kinase/fructose-2,6-biphosphatase 2
210011_s_at	421.732	369.863	1.14024	8.66915e-05	0.024	433.269	377.926	0.872265	0.00532317		EWSR1	BC000527	Ewing sarcoma breakpoint region 1
210023_s_at	495.068	563.438	0.878657	0.00474369	0.073	512.993	555.015	1.08192	0.0136324		NSPC1	BC004952	likely ortholog of mouse nervous system polycomb 1
210027_s_at	1087.69	1190.22	0.913861	0.0256574	0.059	1064.02	1189.34	1.11779	0.0367347		APEX1	M80261	APEX nuclease (multifunctional DNA repair enzyme) 1
210042_s_at	387.396	354.276	1.09348	0.0149069	0	383.422	365.339	0.95284	0.15643	#	CTSZ	AF073890	cathepsin Z
210088_x_at	345.022	302.128	1.14197	0.02509	0.029	345.457	336.926	0.975306	0.684436	#	MYL4	M36172	myosin, light polypeptide 4, alkali; atrial, embryonic
210110_x_at	453.445	576.688	0.78629	0.0300767	0.068	500.792	573.12	1.14443	0.14213	#	HNRPH3	AF132363	heterogeneous nuclear ribonucleoprotein H3 (2H9)
210125_s_at	2932.03	3198.02	0.916825	0.0215992	0.044	3079.9	3288.35	1.06768	0.174787	#	BANF1	AF044773	barrier to autointegration factor 1
210127_at	268.323	423.632	0.633387	0.0374214	0.07	294.314	417.374	1.41813	0.0849628	#	RAB6B	BC002510	RAB6B, member RAS oncogene family
210159_s_at	342.893	459.564	0.746128	0.0352543	0.036	367.38	446.744	1.21603	0.174468	#	TRIM31	AF230386	tripartite motif-containing 31
210186_s_at	1059.4	1333.32	0.794556	0.0249509	0.041	1171.66	1274.69	1.08793	0.0990793	#	FKBP1A	BC005147	FK506 binding protein 1A, 12kDa
210211_s_at	3449.65	3779.36	0.912761	0.0358438	0.043	3657.1	3934.14	1.07575	0.161395	#	HSPCA	AF028832	heat shock 90kDa protein 1, alpha
210272_at	571.01	486.247	1.17432	0.0226614	0.044	509.439	463.824	0.910459	0.155639	#	CYP2B6	M29873	cytochrome P450, family 2, subfamily B, polypeptide 6
210275_s_at	4528.47	3890.59	1.16395	0.0420549	0.05	3686.66	3599.58	0.976381	0.822523	#	ZA20D2	AF062347	zinc finger, A20 domain containing 2
210314_x_at	341.399	315.437	1.0823	0.0127347	0	329.761	304.723	0.92407	0.0467885		TNFSF13 /// TNFSF12-TNFSF13	AF114013	tumor necrosis factor (ligand) superfamily, member 13 /// tumor necrosis factor (ligand) superfamily, member 12-member 13
210329_s_at	379.521	344.916	1.10033	0.0121951	0.052	372.424	341.383	0.916651	0.0847789	#	SGCD	U58331	sarcoglycan, delta (35kDa dystrophin-associated glycoprotein)
210367_s_at	327.299	291.588	1.12247	0.0498123	0	322.698	295.142	0.914607	0.177108	#	PTGES	AF010316	prostaglandin E synthase
210386_s_at	473.919	442.489	1.07103	0.028263	0.077	453.871	425.894	0.938359	0.0677331	#	MTX1	BC001906	metaxin 1
210395_x_at	347.718	308.252	1.12803	0.0438647	0.028	342.37	335.769	0.98072	0.756836	#	MYL4	AF116676	myosin, light polypeptide 4, alkali; atrial, embryonic
210453_x_at	4015.24	4352.19	0.922578	0.0376107	0.06	4050.05	4356.36	1.07563	0.217266	#	ATP5L	AL050277	ATP synthase, H+ transporting, mitochondrial F0 complex, subunit g
210466_s_at	1975.69	2211.25	0.893471	0.0290084	0.054	2104.7	2330.49	1.10727	0.0981387	#	PAI-RBP1	BC002488	PAI-1 mRNA-binding protein
210512_s_at	901.468	1094.1	0.823938	0.0118498	0.04	1169.87	1367.62	1.16904	0.264638	#	VEGF	AF022375	vascular endothelial growth factor
210514_x_at	1134.52	986.4	1.15016	0.0351823	0.022	1187.75	1083.02	0.911832	0.2723	#	HLA-G	AF226990	HLA-G histocompatibility antigen, class I, G
210519_s_at	447.034	403.853	1.10692	0.0439921	0.037	438.447	397.007	0.905486	0.0166513		NQO1	BC000906	NAD(P)H dehydrogenase, quinone 1
210527_x_at	772.607	873.404	0.884593	0.00816474	0.031	950.476	1041.71	1.09599	0.0963156	#	TUBA2	L11645	tubulin, alpha 2
210607_at	264.208	423.096	0.624464	0.0211935	0.06	316.575	409.545	1.29367	0.130408	#	FLT3LG	U03858	fms-related tyrosine kinase 3 ligand
210621_s_at	264.377	360.682	0.732992	0.00392719	0.025	294.775	409.95	1.39072	0.00618696		RASA1	M23612	RAS p21 protein activator (GTPase activating protein) 1
210629_x_at	342.501	322.641	1.06155	0.0213332	0.078	332.673	326.734	0.982147	0.47224	#	LST1	AF000425	leukocyte specific transcript 1
210648_x_at	3800.77	4100.65	0.926872	0.0278371	0.05	3838.52	4185.2	1.09032	0.0595809	#	SNX3	AB047360	sorting nexin 3
210706_s_at	412.126	375.197	1.09842	0.0276479	0.023	403.262	375.375	0.930847	0.0355505		RNF24	BC000213	ring finger protein 24
210749_x_at	653.464	713.119	0.916346	0.0311988	0.069	665.054	679.835	1.02222	0.532895	#	DDR1	L11315	discoidin domain receptor family, member 1
210766_s_at	360.503	424.716	0.84881	0.00695679	0.053	377.197	438.09	1.16144	0.0132421		CSE1L	AF053640	CSE1 chromosome segregation 1-like (yeast)
210782_x_at	431.36	389.972	1.10613	0.0122976	0.062	424.002	378.604	0.892931	0.0132767		GRIN1	L05666	glutamate receptor, ionotropic, N-methyl D-aspartate 1
210789_x_at	460.821	434.291	1.06109	0.0474383	0.047	447.437	430.991	0.963244	0.205988	#	CEACAM3	L00692	carcinoembryonic antigen-related cell adhesion molecule 3
210798_x_at	334.719	309.058	1.08303	0.0490391	0.031	333.479	301.788	0.904969	0.00197193		MASP2	AB008047	mannan-binding lectin serine protease 2
210811_s_at	339.26	292.459	1.16003	0.0162757	0.082	321.834	294.89	0.916281	0.244364	#	DDX49	BC000979	DEAD (Asp-Glu-Ala-Asp) box polypeptide 49
210829_s_at	484.293	807.442	0.599786	0.0115246	0	534.649	797.783	1.49216	0.0264114		SSBP2	AF077048	single-stranded DNA binding protein 2
210840_s_at	369.041	502.363	0.734611	0.0268509	0	407.389	500.102	1.22758	0.0918747	#	IQGAP1	D29640	IQ motif containing GTPase activating protein 1
210870_s_at	638.942	701.137	0.911295	0.0178122	0.011	669.914	687.068	1.02561	0.558739	#	EPM2A	BC005286	epilepsy, progressive myoclonus type 2A, Lafora disease (laforin)
210951_x_at	303.258	354.149	0.856298	0.049728	0.061	304.942	343.36	1.12598	0.0462953		RAB27A	AF125393	RAB27A, member RAS oncogene family
210961_s_at	345.719	326.816	1.05784	0.0472971	0.057	350.29	327.383	0.934605	0.142102	#	ADRA1D	M76446	adrenergic, alpha-1D-, receptor
211058_x_at	2151.63	2569.67	0.837318	0.0102351	0.056	2851.02	2908.22	1.02007	0.878387	#	K-ALPHA-1	BC006379	tubulin, alpha, ubiquitous /// tubulin, alpha, ubiquitous
211072_x_at	2065.54	2482.57	0.832016	0.00861362	0.057	2777.35	2834.16	1.02046	0.874028	#	K-ALPHA-1	BC006481	tubulin, alpha, ubiquitous /// tubulin, alpha, ubiquitous
211215_x_at	474.896	439.526	1.08047	0.00813755	0.026	479.087	425.858	0.888895	0.000483852		DIO2	AB041843	deiodinase, iodothyronine, type II
211231_x_at	502.788	726.726	0.691854	0.00161284	0.052	561.732	705.957	1.25675	0.0298424		CYP4A11	D13705	cytochrome P450, family 4, subfamily A, polypeptide 11
211260_at	366.281	342.027	1.07091	0.0220397	0.015	356.51	332.251	0.931953	0.0801347	#	BMP7	BC004248	bone morphogenetic protein 7 (osteogenic protein 1)
211304_x_at	657.822	615.789	1.06826	0.0460908	0.03	644.308	630.017	0.97782	0.664275	#	KCNJ5	D50134	potassium inwardly-rectifying channel, subfamily J, member 5
211317_s_at	419.627	475.569	0.882368	0.00453636	0.036	431.465	462.731	1.07247	0.0723261	#	CFLAR	AF041461	CASP8 and FADD-like apoptosis regulator
211329_x_at	326.475	295.884	1.10339	0.0412901	0.039	322.511	308.164	0.955515	0.361304	#	HFE	AF115264	hemochromatosis
211337_s_at	314.692	357.605	0.88	0.00987753	0.054	320.708	345.298	1.07668	0.243964	#	76P	BC000966	gamma tubulin ring complex protein (76p gene)
211376_s_at	615.141	550.021	1.1184	0.05041	0.039	613.245	551.526	0.899357	0.0416721		C10orf86	BC005212	chromosome 10 open reading frame 86
211442_x_at	498.586	416.935	1.19584	0.0460919	0.06	464.863	405.79	0.872925	0.0198478		CYP3A43	AF280111	cytochrome P450, family 3, subfamily A, polypeptide 43
211451_s_at	393.806	299.386	1.31538	0.0122644	0.028	354.852	273.298	0.770176	0.00355645		KCNJ4	U24056	potassium inwardly-rectifying channel, subfamily J, member 4
211473_s_at	579.369	496.335	1.1673	0.0230813	0.053	597.43	472.257	0.790482	0.00129532		COL4A6	U04845	collagen, type IV, alpha 6
211528_x_at	1373.71	1198.05	1.14662	0.0120203	0.048	1451.44	1312.01	0.903936	0.234031	#	HLA-G	M90685	HLA-G histocompatibility antigen, class I, G
211529_x_at	1288.98	1071	1.20352	0.00203517	0.019	1338.22	1173.77	0.877114	0.120015	#	HLA-G	M90684	HLA-G histocompatibility antigen, class I, G
211538_s_at	3412	2672.6	1.27666	0.0449123	0	3194.28	2347.5	0.734908	0.0199128		HSPA2	U56725	heat shock 70kDa protein 2
211552_s_at	825.49	953.451	0.865792	0.0305755	0.035	803.889	970.74	1.20755	0.0101976		ALDH4A1	U24267	aldehyde dehydrogenase 4 family, member A1
211570_s_at	350.371	398.802	0.87856	0.0110872	0.02	348.788	418.125	1.19879	0.00186394		RAPSN	BC004196	receptor-associated protein of the synapse, 43kD
211590_x_at	496.657	452.473	1.09765	0.0264961	0.031	479.166	437.78	0.913628	0.0440667		TBXA2R	U11271	thromboxane A2 receptor
211595_s_at	523.541	555.871	0.941839	0.0317617	0.042	528.253	559.381	1.05893	0.0755189	#	MRPS11	AB049944	mitochondrial ribosomal protein S11 /// mitochondrial ribosomal protein S11
211635_x_at	322.661	279.322	1.15516	0.0267661	0.049	309.509	269.982	0.872291	0.00542718		---	M24670	IgM rheumatoid factor RF-TT1, variable heavy chain /// IgM rheumatoid factor RF-TT1, variable heavy chain
211643_x_at	400.976	373.88	1.07247	0.0140356	0	393.947	367.048	0.931717	0.00503085		---	L14457	---
211698_at	1937.08	2161.64	0.896116	0.0410863	0.05	1873.37	2188.74	1.16834	0.00881442		CRI1	AF349444	CREBBP/EP300 inhibitor 1 /// CREBBP/EP300 inhibitor 1
211702_s_at	476.088	441.277	1.07889	0.0405233	0.014	478.993	432.709	0.903372	0.0154947		USP32	AF350251	ubiquitin specific protease 32 /// ubiquitin specific protease 32
211780_x_at	1127.68	1047.8	1.07623	0.0399201	0.067	1084.6	1048.28	0.96651	0.407329	#	DCTN1	BC006163	dynactin 1 (p150, glued homolog, Drosophila) /// dynactin 1 (p150, glued homolog, Drosophila)
211799_x_at	644.213	588.664	1.09436	0.0299274	0.043	679.166	643.291	0.947177	0.547276	#	HLA-A /// HLA-C	U62824	major histocompatibility complex, class I, A /// major histocompatibility complex, class I, C
211809_x_at	356.925	330.462	1.08008	0.00162922	0.053	365.11	335.556	0.919055	0.0070485		COL13A1	M59217	collagen, type XIII, alpha 1
211830_s_at	369.418	346.014	1.06764	0.0100636	0.036	367.805	349.167	0.949328	0.13192	#	CACNA1I	AF211189	calcium channel, voltage-dependent, alpha 1I subunit
211894_x_at	417.198	375.558	1.11088	0.0128913	0.016	414.517	367.965	0.887696	0.00112969		SEZ6L	AB041736	seizure related 6 homolog (mouse)-like /// seizure related 6 homolog (mouse)-like
211908_x_at	440.781	475.058	0.927847	0.0150438	0.054	449.957	470.859	1.04645	0.311543	#	IGHG1	M87268	immunoglobulin heavy constant gamma 1 (G1m marker) /// immunoglobulin heavy constant gamma 1 (G1m marker)
211911_x_at	1358.86	1186.28	1.14548	0.0409838	0.019	1582.06	1355.46	0.856773	0.327659	#	HLA-C /// HLA-B	L07950	major histocompatibility complex, class I, C /// major histocompatibility complex, class I, C /// major histocompatibility complex, class I, B /// major histocompatibility complex, class I, B
211938_at	3639.25	3929.8	0.926065	0.0330601	0.034	3545.26	3962.33	1.11764	0.000148298		EIF4B	BF247371	eukaryotic translation initiation factor 4B
211951_at	782.346	868.044	0.901274	0.024339	0.023	884.674	894.125	1.01068	0.928273	#	NOLC1	D21262	nucleolar and coiled-body phosphoprotein 1
211960_s_at	1522.03	1665.39	0.913914	0.0143347	0.019	1646.26	1727.8	1.04953	0.216936	#	RAB7	BG261416	RAB7, member RAS oncogene family
211968_s_at	2367.55	2844.39	0.83236	0.018535	0.047	2552.05	3006.23	1.17796	0.101669	#	HSPCA	AI962933	heat shock 90kDa protein 1, alpha
211971_s_at	1519.14	1734.48	0.875846	0.0352454	0.026	1481.07	1725.92	1.16532	0.0188547		LRPPRC	AI653608	leucine-rich PPR-motif containing
212008_at	531.648	581.423	0.914391	0.042587	0.034	587.302	631.824	1.07581	0.33039	#	UBXD2	N29889	UBX domain containing 2
212030_at	295.015	340.866	0.865488	0.0247292	0.067	310.03	319.833	1.03162	0.643451	#	RBM25	BG251218	RNA binding motif protein 25
212044_s_at	850.23	662.693	1.28299	0.00239791	0.077	789.415	688.874	0.872638	0.0213772		---	BE737027	---
212046_x_at	608.529	574.279	1.05964	0.022697	0.045	597.625	561.898	0.940219	0.0984981	#	MAPK3	X60188	mitogen-activated protein kinase 3
212052_s_at	477.817	499.929	0.955768	0.0337406	0.019	495.509	497.746	1.00451	0.91179	#	KIAA0676	AB014576	KIAA0676 protein
212054_x_at	771.663	702.024	1.0992	0.0353234	0.039	743.443	721.547	0.970547	0.297545	#	KIAA0676	AK026096	KIAA0676 protein
212064_x_at	956.111	1029.26	0.928929	0.0271708	0.01	989.247	1004.58	1.0155	0.618042	#	MAZ	AI471665	MYC-associated zinc finger protein (purine-binding transcription factor)
212130_x_at	7449.86	8126.73	0.916711	0.0144673	0.035	7637.74	7701.28	1.00832	0.892778	#	SUI1	AL537707	putative translation initiation factor
212138_at	326.745	359.321	0.909339	0.024732	0.009	339.134	377.877	1.11424	0.0278278		SCC-112	AK021757	SCC-112 protein
212144_at	667.05	744.952	0.895427	0.0149634	0.036	708.887	704.256	0.993467	0.939924	#	UNC84B	AL021707	unc-84 homolog B (C. elegans)
212159_x_at	304.092	400.276	0.759707	0.00587877	0.07	341.567	416.761	1.22014	0.0497504		AP2A2	AI125280	adaptor-related protein complex 2, alpha 2 subunit
212211_at	385.108	431.067	0.893384	0.00887421	0.012	383.264	431.248	1.1252	0.0190025		ANKRD17	AI986295	ankyrin repeat domain 17
212214_at	637.8	739.059	0.862989	0.000744982	0.02	630.898	731.768	1.15988	0.00438946		OPA1	BF439570	optic atrophy 1 (autosomal dominant)
212221_x_at	892.662	1026.02	0.870023	0.00394232	0.077	881.126	1026.41	1.16488	0.00740506		IDS	AV703259	iduronate 2-sulfatase (Hunter syndrome)
212227_x_at	7734.53	8348.34	0.926474	0.0226925	0.034	7964.94	7863.1	0.987214	0.825594	#	SUI1	W67644	putative translation initiation factor
212232_at	497.085	571.379	0.869975	0.0127143	0	505.104	553.158	1.09514	0.189939	#	FNBP4	AB023231	formin binding protein 4
212242_at	1880.6	2411.93	0.779709	0.00357159	0.107	2608.3	2833.68	1.08641	0.242786	#	TUBA1	AL565074	tubulin, alpha 1 (testis specific)
212244_at	845.269	944.603	0.89484	0.0392096	0.007	806.035	905.407	1.12328	0.0288652		GRINL1A	AL050091	glutamate receptor, ionotropic, N-methyl D-aspartate-like 1A
212291_at	427.444	474.888	0.900094	0.0500299	0.029	432.727	488.872	1.12975	0.00560279		HIPK1	AI393355	homeodomain interacting protein kinase 1
212293_at	557.944	666.625	0.836968	0.0333599	0.011	568.144	741.956	1.30593	0.00368785		HIPK1	BG111260	homeodomain interacting protein kinase 1
212333_at	647.963	740.836	0.874638	0.0292191	0.069	696.716	769.622	1.10464	0.217473	#	DKFZP564F0522	AL049943	DKFZP564F0522 protein
212337_at	405.558	441.576	0.918432	0.0383925	0.03	424.695	442.169	1.04114	0.33944	#	TI-227H	AI687738	hypothetical protein TI-227H
212358_at	521.782	472.315	1.10473	0.0225499	0.029	521.896	476.505	0.913025	0.00389564		CLIPR-59	AL117468	CLIP-170-related protein
212379_at	662.519	578.543	1.14515	0.0279831	0.062	649.139	605.787	0.933216	0.0990134	#	GART	BE966876	phosphoribosylglycinamide formyltransferase, phosphoribosylglycinamide synthetase, phosphoribosylaminoimidazole synthetase
212389_at	500.714	425.747	1.17608	0.00403036	0.037	493.709	434.751	0.880581	0.0232871		SBF1	AW243200	SET binding factor 1
212435_at	631.076	879.583	0.717472	0.0241691	0.067	642.089	868.839	1.35314	0.0157881		---	AA205593	MRNA; cDNA DKFZp586K1123 (from clone DKFZp586K1123)
212500_at	354.931	403.288	0.880093	0.0213652	0.066	342.71	425.699	1.24216	2.52311e-06		C10orf22	AL049319	chromosome 10 open reading frame 22
212503_s_at	843.412	983.684	0.857401	0.0210968	0.065	848.505	1004.64	1.18401	0.0842321	#	KIAA0934	N22859	KIAA0934
212504_at	778.156	865.335	0.899254	0.00822791	0.071	762.65	868.97	1.13941	0.0414016		KIAA0934	N31807	KIAA0934
212509_s_at	982.149	892.048	1.101	0.0444532	0	979.292	923.219	0.942741	0.272277	#	FLJ46603	BF968134	FLJ46603 protein
212516_at	323.583	303.344	1.06672	0.0322652	0.029	317.859	293.704	0.924007	0.0366589		CENTD2	AB018325	centaurin, delta 2
212541_at	338.763	356.743	0.9496	0.0101299	0.033	336.488	348.724	1.03637	0.332957	#	PP591	AL562282	FAD-synthetase
212565_at	316.838	289.74	1.09353	0.0222315	0.018	310.281	298.06	0.960614	0.149703	#	---	BE302191	---
212579_at	335.503	372.553	0.90055	0.0229875	0.017	336.663	371.79	1.10434	0.0852691	#	KIAA0650	AB014550	KIAA0650 protein
212589_at	583.072	696.62	0.837001	0.0290147	0.041	602.297	731.324	1.21423	0.0370352		RRAS2	AI753792	related RAS viral (r-ras) oncogene homolog 2
212616_at	483.265	577.529	0.836781	0.00728837	0.054	499.71	611.397	1.2235	0.000496086		CHD9	BF668950	chromodomain helicase DNA binding protein 9
212626_x_at	1013.19	1113.69	0.909757	0.027782	0	1071.02	1201.61	1.12193	0.0713629	#	HNRPC	AA664258	heterogeneous nuclear ribonucleoprotein C (C1/C2)
212634_at	382.007	430.597	0.887157	0.00862657	0.045	365.388	422.072	1.15513	0.000611671		KIAA0776	AW298092	KIAA0776
212645_x_at	449.01	470.786	0.953746	0.0118204	0.036	462.95	487.229	1.05244	0.0307612		BRE	AL566299	brain and reproductive organ-expressed (TNFRSF1A modulator)
212660_at	362.716	391.297	0.926958	0.0483231	0.046	383.12	397.188	1.03672	0.0566843	#	PHF15	AI735639	PHD finger protein 15
212678_at	306.615	335.522	0.913845	0.0188902	0.069	327.474	334.719	1.02212	0.713821	#	NF1	AW054826	Neurofibromin 1 (neurofibromatosis, von Recklinghausen disease, Watson disease)
212682_s_at	828.916	739.96	1.12022	0.0273548	0.03	810.543	724.057	0.893298	0.00699757		BC002942	AI081535	hypothetical protein BC002942
212710_at	394.488	484.445	0.814309	0.0122242	0.029	434.633	481.928	1.10882	0.0765243	#	CAMSAP1	AL043774	calmodulin regulated spectrin-associated protein 1
212714_at	569.917	671.32	0.84895	0.00180298	0.034	608.089	758.872	1.24796	0.00088219		LOC113251	AL050205	c-Mpl binding protein
212718_at	459.452	521.396	0.881195	0.0331911	0.064	509.288	564.23	1.10788	0.199806	#	PAPOLA	BF797555	poly(A) polymerase alpha
212752_at	869.93	968.968	0.89779	0.0139586	0.017	881.528	984.225	1.1165	0.00390537		CLASP1	AA176798	cytoplasmic linker associated protein 1
212783_at	364.742	402.896	0.905301	0.0315163	0.064	374.793	410.854	1.09622	0.0483611		RBBP6	AI538172	retinoblastoma binding protein 6
212787_at	472.654	509.902	0.926949	0.00141233	0.026	484.275	519.225	1.07217	0.118096	#	YLPM1	AI952986	YLP motif containing 1
212795_at	419.675	519.272	0.808198	0.0250645	0.043	408.647	508.483	1.24431	0.021537		KIAA1033	AL137753	KIAA1033 protein
212822_at	1326.28	1157.29	1.14602	0.0252461	0.02	1306.1	1152.79	0.882621	0.0450295		HEG	AA121502	HEG homolog
212829_at	342.987	326.535	1.05038	0.0449073	0.028	332.295	320.993	0.965988	0.376166	#	---	BE878277	CDNA FLJ13267 fis, clone OVARC1000964 /// CDNA FLJ13267 fis, clone OVARC1000964
212855_at	285.789	339.195	0.842552	0.00134797	0.017	303.906	358.539	1.17977	0.0135865		KIAA0276	D87466	KIAA0276 protein
212873_at	373.461	335.678	1.11256	0.0238654	0.051	371.122	329.596	0.888108	0.0016139		HA-1	BE349017	minor histocompatibility antigen HA-1
212905_at	291.791	346.345	0.842487	0.0259006	0.057	303.395	363.577	1.19836	0.0398904		CSTF2T	AI872408	cleavage stimulation factor, 3' pre-RNA, subunit 2, 64kDa, tau variant
212934_at	499.025	567.51	0.879324	0.0326623	0.038	505.252	533.218	1.05535	0.111746	#	LOC137886	AI245523	hypothetical protein LOC137886
212961_x_at	423.592	458.412	0.924043	0.0354326	0.057	444.638	462.977	1.04125	0.347418	#	CXorf40	L43578	chromosome X open reading frame 40
212973_at	562.26	611.552	0.919398	0.0448723	0.021	566.957	618.623	1.09113	0.00768969		RPIA	AI692341	ribose 5-phosphate isomerase A (ribose 5-phosphate epimerase)
212993_at	292.908	409.095	0.715991	0.000144241	0.031	379.52	470.156	1.23882	0.0609061	#	---	AA114166	Transcribed locus, weakly similar to XP_316923.1 Anopheles gambiae str. PEST ENSANGG00000020250 gene
213009_s_at	417.795	460.025	0.908201	0.0469899	0.086	429.979	474.771	1.10417	0.0299156		TRIM37	AK022701	tripartite motif-containing 37
213069_at	537.967	862.261	0.623903	0.0145543	0	568.826	811.883	1.4273	0.0308159		---	AI148659	---
213101_s_at	798.12	926.091	0.861816	0.00565742	0.05	1029.65	1036.61	1.00677	0.970263	#	ACTR3	Z78330	ARP3 actin-related protein 3 homolog (yeast)
213113_s_at	332.958	319.758	1.04128	0.0356625	0.02	331.5	313.861	0.94679	0.0627864	#	SLC43A3	AI630178	solute carrier family 43, member 3
213129_s_at	1674.5	1972.41	0.848961	0.0169932	0.053	1574.46	2010.92	1.27721	0.00199138		GCSH	AI970157	glycine cleavage system protein H (aminomethyl carrier)
213133_s_at	1551.59	1742.24	0.89057	0.0442865	0.025	1517.58	1725.8	1.1372	0.0668411	#	GCSH	AW237404	glycine cleavage system protein H (aminomethyl carrier)
213161_at	668.168	585.955	1.14031	0.0145574	0.031	639.488	594.196	0.929175	0.0417724		C9orf97	AI583393	chromosome 9 open reading frame 97 /// chromosome 9 open reading frame 97
213186_at	299.789	364.394	0.822707	7.86125e-05	0.09	300.088	354.063	1.17987	0.00421111		DZIP3	BG502305	zinc finger DAZ interacting protein 3
213208_at	652.836	771.952	0.845695	0.0427421	0.025	657.027	777.294	1.18305	0.062711	#	KIAA0240	AI801951	KIAA0240
213246_at	301.639	341.145	0.884196	0.0269489	0.048	313.471	345.753	1.10298	0.0997457	#	C14orf109	AI346504	Chromosome 14 open reading frame 109
213289_at	530.04	602.679	0.879472	0.0218533	0.078	507.521	591.518	1.1655	0.0119553		---	BE221922	---
213294_at	362.403	407.136	0.890127	0.00835526	0.043	352.578	403.311	1.14389	0.0057273		---	AV755522	---
213311_s_at	547.103	504.678	1.08406	0.0488424	0.049	532.389	521.212	0.979006	0.512892	#	KIAA1049	BF000251	KIAA1049 protein
213336_at	331.622	356.346	0.930617	0.00250295	0.033	326.04	350.219	1.07416	0.00654638		BAZ1B	AI826454	Bromodomain adjacent to zinc finger domain, 1B
213337_s_at	638.205	585.089	1.09078	0.0150266	0.046	624.84	580.329	0.928764	0.106961	#	---	AA877218	---
213348_at	803.806	1071.55	0.750134	0.0471885	0.074	732.034	1000.56	1.36682	0.010177		CDKN1C	N33167	cyclin-dependent kinase inhibitor 1C (p57, Kip2)
213350_at	946.26	778.907	1.21486	0.0134979	0.037	966.124	797.418	0.825378	0.0152317		---	BF680255	---
213389_at	562.022	600.92	0.935268	0.0457494	0.026	542.673	570.846	1.05192	0.337206	#	ZNF592	BF508616	zinc finger protein 592
213427_at	380.64	291.217	1.30707	1.24064e-05	0.08	385.36	297.753	0.772664	0.000523985		RPP40	NM_006638	ribonuclease P 40kDa subunit
213510_x_at	395.914	471.166	0.840286	0.00458361	0.048	398.295	456.197	1.14537	0.108443	#	LOC220594	AW194543	TL132 protein
213538_at	360.291	335.393	1.07423	0.00688547	0.035	347.004	331.369	0.954941	0.0269485		SON	AI936458	SON DNA binding protein
213540_at	728.268	669.681	1.08748	0.0288426	0.013	709.774	645.112	0.908897	0.0778647	#	HSD17B8	AL031228	hydroxysteroid (17-beta) dehydrogenase 8
213553_x_at	499.32	465.835	1.07188	0.0484827	0.039	489.551	458.26	0.936083	0.0121989		APOC1	W79394	apolipoprotein C-I
213564_x_at	2244.42	3742.23	0.599756	0.00658578	0.04	2340.24	3930.33	1.67946	0.000596719		LDHB	BE042354	lactate dehydrogenase B
213573_at	496.372	598.154	0.829839	0.000300324	0.025	539.061	598.816	1.11085	0.0482546		---	AA861608	---
213574_s_at	944.089	1097.81	0.859973	0.024653	0.011	1001.27	1110.38	1.10898	0.116373	#	---	AA861608	---
213594_x_at	375.421	405.941	0.924817	0.0158813	0.054	376.084	410.147	1.09057	0.0720664	#	FUSIP1	AU130523	FUS interacting protein (serine-arginine rich) 1
213599_at	344.966	304.757	1.13194	0.0208932	0.006	340.749	346.656	1.01734	0.828279	#	OIP5	BE045993	Opa-interacting protein 5
213611_at	391.127	351.239	1.11356	0.0171122	0.057	388.877	342.353	0.880363	0.00296195		AQP5	BF726531	aquaporin 5
213642_at	1277.7	940.672	1.35829	0.000775252	0.038	1175.24	965.546	0.82157	0.0121202		---	BE312027	---
213646_x_at	2024.13	2350.59	0.861112	0.0291429	0.006	2735.12	2699.43	0.986953	0.921303	#	K-ALPHA-1	BE300252	tubulin, alpha, ubiquitous
213657_s_at	1354.48	1550.34	0.873667	0.0122196	0.065	1426.7	1604.61	1.1247	0.0974122	#	DKFZp547K1113	BE858194	Hypothetical protein DKFZp547K1113
213682_at	315.046	372.138	0.846584	0.0336661	0.036	328.31	363.7	1.10779	0.0701167	#	NUP50	AL036344	nucleoporin 50kDa
213687_s_at	4232.51	4475.46	0.945714	0.0440316	0.047	4160.03	4483.62	1.07778	0.0623142	#	RPL35A	BE968801	ribosomal protein L35a
213689_x_at	317.94	382.849	0.830458	0.0378156	0.07	337.207	410.841	1.21837	0.00138646		RPL5 /// LOC388650	AL137958	ribosomal protein L5 /// hypothetical LOC388650
213715_s_at	380.939	355.417	1.07181	0.0174238	0.059	375.349	361.952	0.964306	0.131864	#	---	AF070591	---
213726_x_at	895.464	1052.66	0.850666	0.0201586	0.056	1233.28	1302.71	1.0563	0.611396	#	TUBB2	AA515698	tubulin, beta, 2
213736_at	682.925	572.146	1.19362	0.00146139	0.059	622.65	575.234	0.923847	0.199059	#	COX5B	AI557312	cytochrome c oxidase subunit Vb
213756_s_at	412.677	342.492	1.20492	0.0037684	0.074	378.873	346.982	0.915825	0.0294172		HSF1	AI393937	heat shock transcription factor 1
213794_s_at	638.051	604.898	1.05481	0.0166118	0	633.04	602.112	0.951143	0.184785	#	C14orf120	AI269117	chromosome 14 open reading frame 120
213803_at	552.306	679.072	0.813324	6.06976e-05	0.072	598.75	692.058	1.15584	0.00315996		---	BG545463	---
213826_s_at	434.777	381.166	1.14065	0.000326884	0.041	436.878	393.199	0.900021	0.0524244	#	---	AA292281	---
213829_x_at	471.936	443.794	1.06341	0.0439116	0.068	481.223	435.136	0.904229	0.00586928		TNFRSF6B	AK000485	tumor necrosis factor receptor superfamily, member 6b, decoy
213834_at	337.449	484.294	0.696784	0.024858	0.065	387.238	465.215	1.20137	0.241138	#	IQSEC3	AB029033	IQ motif and Sec7 domain 3
213836_s_at	909.107	1241.91	0.732021	0.0249652	0.081	1033.51	1122.25	1.08586	0.194457	#	WIPI49	AW052084	WD40 repeat protein Interacting with phosphoInositides of 49kDa
213850_s_at	1471.3	1308	1.12484	0.0412917	0.055	1470.83	1266.02	0.860752	0.00052132		SFRS2IP	AI984932	splicing factor, arginine/serine-rich 2, interacting protein
213905_x_at	344.493	296.288	1.1627	0.0431893	0.077	361.297	320.025	0.885768	0.219531	#	BGN /// SDCCAG33	AA845258	biglycan /// serologically defined colon cancer antigen 33
213932_x_at	2194.93	1792.18	1.22473	0.0236453	0.04	2378.81	2031.5	0.853996	0.14495	#	HLA-A	AI923492	major histocompatibility complex, class I, A
213977_s_at	615.189	670.287	0.9178	0.0071737	0	657.78	669.677	1.01809	0.646556	#	CIZ1	AA054734	CDKN1A interacting zinc finger protein 1
214001_x_at	469.889	411.192	1.14275	0.0363723	0.038	437.521	415.445	0.949543	0.305999	#	---	AW302047	---
214025_at	321.028	296.964	1.08103	0.00771029	0.065	321.623	299.532	0.931314	0.00752511		---	AI922937	---
214035_x_at	2094.72	2377.81	0.880943	0.0162435	0.06	2221.52	2278.46	1.02563	0.637166	#	LOC399491	AA308853	LOC399491 protein
214041_x_at	2565.49	1866.84	1.37424	0.000219025	0.071	2339.71	1950.35	0.833586	0.0041916		---	BE857772	---
214045_at	336.083	386.529	0.869491	0.00033311	0.016	303.861	357.896	1.17783	0.017991		LIAS	BF056778	lipoic acid synthetase
214112_s_at	455.188	502.252	0.906294	0.0391904	0.018	481.691	511.528	1.06194	0.14582	#	CXorf40	AA543076	chromosome X open reading frame 40
214135_at	379.024	338.514	1.11967	0.0316662	0.038	373.834	332.318	0.888947	0.0168256		CLDN18	BE551219	claudin 18
214146_s_at	910.328	676.373	1.3459	0.00199653	0.042	863.348	671.558	0.777853	0.032188		PPBP	R64130	pro-platelet basic protein (chemokine (C-X-C motif) ligand 7)
214168_s_at	375.006	325.095	1.15353	0.0012366	0.09	364.926	336.835	0.923024	0.0392654		TJP1	AA813018	tight junction protein 1 (zona occludens 1)
214175_x_at	326.475	300.058	1.08804	0.0244731	0.058	319.459	306.235	0.958608	0.232186	#	PDLIM4	AI254547	PDZ and LIM domain 4
214259_s_at	724.014	813.981	0.889472	0.0120323	0.024	687.954	819.798	1.19165	0.00030973		AKR7A2	AI144075	aldo-keto reductase family 7, member A2 (aflatoxin aldehyde reductase)
214278_s_at	1132.09	925.761	1.22288	0.0279654	0.041	1176.43	923.68	0.785156	0.00094715		---	AI358939	---
214328_s_at	4601.69	5055.86	0.910168	0.0158048	0.055	4876.94	5274.25	1.08147	0.0579374	#	HSPCA	R01140	heat shock 90kDa protein 1, alpha
214352_s_at	315.371	366.746	0.859915	0.00349523	0.042	334.986	385.784	1.15164	0.0938568	#	KRAS2	BF673699	v-Ki-ras2 Kirsten rat sarcoma 2 viral oncogene homolog
214359_s_at	2964.89	3392.97	0.873834	0.00869818	0	3418.45	3616.71	1.058	0.426578	#	HSPCB	AI218219	heat shock 90kDa protein 1, beta
214393_at	241.102	392.476	0.614312	0.0244245	0.081	272.515	356.669	1.3088	0.164706	#	LOC284062	AI884814	hypothetical protein LOC284062
214412_at	367.019	314.056	1.16864	0.00175514	0.034	338.115	297.149	0.87884	0.0351133		H2AFB3	AI218431	H2A histone family, member B3
214423_x_at	440.326	403.389	1.09157	0.020764	0.014	438.129	404.902	0.924162	0.026562		ALDOB	AV652403	Aldolase B, fructose-bisphosphate
214490_at	339.445	309.602	1.09639	0.00120845	0.118	323.964	309.365	0.954935	0.209944	#	ARSF	NM_004042	arylsulfatase F
214491_at	338.276	310.901	1.08805	0.0086974	0	332.597	305.98	0.919972	0.0432514		SSTR3	NM_001051	somatostatin receptor 3
214603_at	1233.24	1069	1.15363	0.00264408	0	1238.51	1067.33	0.861786	0.00261112		MAGEA2B /// MAGEA2	U82671	melanoma antigen, family A, 2B /// melanoma antigen, family A, 2
214622_at	980.014	812.294	1.20648	0.00356498	0.048	897.773	769.3	0.856898	0.0443974		CYP21A2	M17252	cytochrome P450, family 21, subfamily A, polypeptide 2
214665_s_at	1574.62	1788.81	0.880263	0.0339885	0.046	1625.79	1938.6	1.19241	0.00469766		CHP	AK000095	calcium binding protein P22
214684_at	396.619	441.96	0.89741	0.0322188	0.101	416.198	466.171	1.12007	0.0826232	#	MEF2A	X63381	MADS box transcription enhancer factor 2, polypeptide A (myocyte enhancer factor 2A)
214692_s_at	529.709	498.095	1.06347	0.00848395	0.036	515.512	492.255	0.954885	0.0365658		JRK	AL041139	jerky homolog (mouse)
214696_at	711.645	895.072	0.79507	0.0227754	0.008	768.914	818.446	1.06442	0.373696	#	MGC14376	AF070569	hypothetical protein MGC14376
214719_at	289.633	316.208	0.915956	0.0222498	0.019	296.091	296.666	1.00194	0.955855	#	LOC283537	AK026720	hypothetical protein LOC283537
214737_x_at	1105.62	1203.94	0.918334	0.0486085	0.03	1158.67	1306.71	1.12777	0.0660767	#	HNRPC	AV725195	heterogeneous nuclear ribonucleoprotein C (C1/C2)
214779_s_at	470.861	442.311	1.06455	0.0462571	0.048	465.022	438.999	0.94404	0.0832919	#	RUTBC3	R51077	RUN and TBC1 domain containing 3
214870_x_at	2081.11	2333.27	0.891925	0.0457044	0.028	2231.29	2290.44	1.02651	0.704682	#	NPIP /// LOC339047	AC002045	nuclear pore complex interacting protein /// hypothetical protein LOC339047
214986_x_at	440.134	416.829	1.05591	0.0343975	0.061	445.746	412.943	0.92641	0.0254001		PPIL2	U37221	peptidylprolyl isomerase (cyclophilin)-like 2
215027_at	458.411	408.48	1.12224	0.00186157	0.031	424.547	387.447	0.912613	0.0272321		HSU79275	U79275	hypothetical protein HSU79275
215153_at	700.165	605.361	1.15661	0.0119223	0.044	660.965	600.297	0.908214	0.0417704		CAPON	AF037070	C-terminal PDZ domain ligand of neuronal nitric oxide synthase
215177_s_at	322.809	370.293	0.871766	0.00404113	0	368.105	390.553	1.06098	0.270258	#	ITGA6	AV733308	integrin, alpha 6
215182_x_at	464.38	421.32	1.1022	0.0312857	0.056	465.521	428.778	0.921072	0.0293447		---	AL050122	Transcribed locus, weakly similar to XP_375099.1 hypothetical protein LOC283585 [Homo sapiens]
215238_s_at	422.242	395.446	1.06776	0.0169446	0.066	403.384	388.672	0.963529	0.304927	#	DOCK9	AW450751	dedicator of cytokinesis 9
215286_s_at	358.535	423.958	0.845685	0.0244479	0.071	371.355	398.347	1.07269	0.388255	#	PHTF2	AL050389	putative homeodomain transcription factor 2
215313_x_at	2128.26	1716.82	1.23965	0.0361043	0.075	2274.92	2009.4	0.883286	0.278298	#	HLA-A	AA573862	major histocompatibility complex, class I, A
215372_x_at	562.053	492.935	1.14022	0.0442383	0.031	532.561	494.22	0.928006	0.316617	#	LOC151878	AU146794	Hypothetical protein LOC151878
215403_at	599.616	535.39	1.11996	0.0358869	0.057	587.522	546.966	0.930971	0.0817592	#	---	AK024860	---
215493_x_at	351.38	309.236	1.13628	0.0155362	0.1	349.61	327.786	0.937578	0.0930812	#	BTN2A1	AL121936	butyrophilin, subfamily 2, member A1
215533_s_at	369.437	399.264	0.925296	0.00817678	0.053	389.821	384.664	0.986772	0.779519	#	UBE4B	AF091093	ubiquitination factor E4B (UFD2 homolog, yeast)
215596_s_at	605.17	695.017	0.870727	0.0169798	0.027	583.42	656.324	1.12496	0.0232338		ZNF294	AL163248	zinc finger protein 294
215614_at	319.757	286.942	1.11436	0.0298396	0.034	322.419	282.532	0.876287	0.000340502		---	AK022038	Similar to beta-1,4-mannosyltransferase; beta-1,4 mannosyltransferase
215683_at	316.385	296.081	1.06857	0.0155966	0.012	308.248	291.431	0.945443	0.0241663		---	AF070628	Clone 24803 mRNA sequence
215701_at	991.936	884.127	1.12194	0.044664	0	928.958	828.213	0.891551	0.0216754		ZNF291	AL109666	Zinc finger protein 291
215728_s_at	317.361	294.867	1.07628	0.00558433	0.07	315.433	291.164	0.92306	0.0311558		BACH	AL031848	brain acyl-CoA hydrolase
215764_x_at	364.654	325.337	1.12085	0.01074	0.029	373.06	326.049	0.873984	0.0136317		AP2A2	AA877641	Adaptor-related protein complex 2, alpha 2 subunit
215776_at	341.99	296.501	1.15342	0.0409417	0.009	348.175	319.573	0.91785	0.0308248		INSRR	J05046	insulin receptor-related receptor
215841_at	495.143	450.204	1.09982	0.0182535	0.063	493.799	468.639	0.949049	0.216229	#	GUCA1B	AL096814	guanylate cyclase activator 1B (retina)
215946_x_at	482.668	441.118	1.09419	0.0113956	0.011	471.896	437.622	0.92737	0.0732149	#	LOC91316 /// IGLL1	AL022324	similar to bK246H3.1 (immunoglobulin lambda-like polypeptide 1, pre-B-cell specific) /// immunoglobulin lambda-like polypeptide 1
215994_x_at	780.295	716.724	1.0887	0.024542	0.019	770.851	725.04	0.940572	0.0203057		KIAA0676	AK001196	KIAA0676 protein
216046_at	429.166	397.244	1.08036	0.0169162	0.037	424.02	390.685	0.921383	0.0169594		PDE8A	AL109726	Phosphodiesterase 8A
216119_s_at	331.34	479.996	0.690298	0.0101278	0	375.485	445.007	1.18515	0.172617	#	C20orf28	AL109804	chromosome 20 open reading frame 28
216141_at	614.402	531.386	1.15623	0.0392054	0.028	536.564	529.134	0.986152	0.675982	#	---	AL137285	---
216145_at	388.558	358.822	1.08287	0.0424044	0.051	366.381	347.437	0.948293	0.240602	#	DGCR14	AL137713	DiGeorge syndrome critical region gene 14
216199_s_at	328.897	379.92	0.8657	0.0241739	0.025	333.428	394.488	1.18313	0.000369146		MAP3K4	AL109942	mitogen-activated protein kinase kinase kinase 4
216246_at	1153.28	915.145	1.26022	0.00410873	0.015	1090.75	945.322	0.866668	0.0594961	#	---	AF113008	---
216269_s_at	482.884	434.08	1.11243	0.0081906	0.022	464.964	435.628	0.936909	0.0161195		ELN	M24782	elastin (supravalvular aortic stenosis, Williams-Beuren syndrome)
216293_at	825.058	768.764	1.07323	0.0485769	0.042	771.063	768.938	0.997244	0.932418	#	---	X81636	---
216305_s_at	438.224	346.452	1.26489	0.0310134	0.084	428.389	341.502	0.797177	0.0360094		C2orf3	AC005034	chromosome 2 open reading frame 3
216323_x_at	675.812	774.148	0.872976	0.0126897	0	861.897	923.369	1.07132	0.276045	#	---	K03460	---
216331_at	1685.71	1876.19	0.898472	0.0450231	0.038	1870.7	1965.59	1.05072	0.536923	#	ITGA7	AK022548	integrin, alpha 7
216338_s_at	399.07	440.587	0.905768	0.0247368	0.057	414.381	427.136	1.03078	0.497925	#	C6orf109	AK021433	chromosome 6 open reading frame 109
216405_at	635.031	505.011	1.25746	0.00318971	0.011	620.615	490.514	0.790368	0.00687214		---	M14087	Transcribed locus, highly similar to NP_032521.1 lectin, galactose binding, soluble 1 [Mus musculus]
216488_s_at	529.368	365.157	1.4497	0.0154551	0.022	430.18	414.622	0.963833	0.742301	#	ATP11A	AL161996	ATPase, Class VI, type 11A
216554_s_at	452.36	387.753	1.16662	0.0270856	0.033	460.573	378.923	0.822722	0.00556921		---	U88968	---
216558_x_at	368.661	608.896	0.605458	0.0333525	0.061	400.913	585.159	1.45957	0.0720406	#	---	AF044595	---
216589_at	601.999	476.838	1.26248	0.0212287	0.014	535.305	483.454	0.903137	0.305517	#	---	AL031276	---
216692_at	481.01	787.747	0.610615	0.0150273	0.025	540.913	774.786	1.43237	0.0620338	#	ZNF337	AL137428	Zinc finger protein 337
216713_at	343.198	505.173	0.679367	0.0165441	0.021	362.233	479.661	1.32418	0.0457716		CCM1	AL049325	cerebral cavernous malformations 1
216842_x_at	461.62	400.865	1.15156	0.00251822	0.059	444.08	387.252	0.872032	0.00995733		LOC378948 /// LOC378951 /// MGC26641 /// LOC378949 /// MGC33094 /// RBMY1A1 /// LOC378950	U38460	RNA binding motif protein, Y-linked, family 1 /// RNA binding motif protein, Y-linked, family 1 /// RNA binding motif protein, Y-linked, family 2, pseudogene /// RNA binding motif protein, Y-linked, family 1 /// RNA binding motif protein, Y-linked, family 1 /// RNA binding motif protein, Y-linked, family 1, member A1 /// RNA binding motif protein, Y-linked, family 1
216852_x_at	406.022	368.894	1.10065	0.0345959	0.03	406.523	364.811	0.897393	0.00372491		---	AF234255	---
216903_s_at	870.285	793.092	1.09733	0.0245275	0.072	892.55	811.772	0.909498	0.145079	#	CBARA1	AK022697	calcium binding atopy-related autoantigen 1
216938_x_at	866.759	743.568	1.16567	0.0314445	0.018	845.387	736.363	0.871037	0.00288916		DRD2	S69899	dopamine receptor D2
216979_at	289.924	380.686	0.761582	0.0399295	0.032	293.735	373.292	1.27085	0.0893459	#	NR4A3	X89894	nuclear receptor subfamily 4, group A, member 3
217004_s_at	360.111	588.029	0.612403	0.0474159	0.05	429.978	627.022	1.45827	0.0759852	#	MCF2	X13230	MCF.2 cell line derived transforming sequence
217043_s_at	309.897	324.322	0.955523	0.0480014	0.051	305.783	317.948	1.03978	0.0881033	#	MFN1	U95822	mitofusin 1
217045_x_at	558.33	629.947	0.886312	0.00929498	0.056	591.101	622.557	1.05322	0.102572	#	NCR2	AL136967	natural cytotoxicity triggering receptor 2
217071_s_at	282.944	357.243	0.792023	0.0319037	0.058	303.812	354.664	1.16738	0.164197	#	MTHFR	AJ249275	5,10-methylenetetrahydrofolate reductase (NADPH)
217192_s_at	540.179	744.534	0.725526	0.0136181	0.059	586.392	748.442	1.27635	0.0333201		PRDM1	AL022067	PR domain containing 1, with ZNF domain
217260_x_at	329.989	279.52	1.18056	0.0157829	0.037	307.178	266.619	0.86796	0.00123344		---	AJ239383	---
217276_x_at	369.418	328.564	1.12434	0.0144617	0.073	368.619	325.064	0.881843	0.0027634		dJ222E13.1	AL590118	kraken-like
217280_x_at	320.452	293.845	1.09055	0.0343335	0.063	323.397	297.658	0.920408	0.0120755		GABRA5	AF061785	gamma-aminobutyric acid (GABA) A receptor, alpha 5
217284_x_at	367.738	318.673	1.15396	0.00843256	0.041	366.349	317.694	0.867191	5.58096e-05		dJ222E13.1	AL589866	kraken-like
217316_at	420.211	337.523	1.24498	0.0216108	0.062	359.043	320.226	0.891886	0.182987	#	OR7A10	AC005255	olfactory receptor, family 7, subfamily A, member 10
217366_at	402.675	785.414	0.512692	0.0181307	0.05	475.876	726.257	1.52615	0.0660671	#	CTNNA1	Z37994	catenin (cadherin-associated protein), alpha 1, 102kDa
217397_at	647.352	571.579	1.13257	0.0387983	0.081	629.724	548.459	0.870951	0.00947931		---	AE000659	T cell receptor V-alpha 24 (TCRA)
217407_x_at	421.823	391.883	1.0764	0.0390344	0.05	415.06	388.19	0.935264	0.0161649		PPIL2	U37220	peptidylprolyl isomerase (cyclophilin)-like 2
217411_s_at	321.132	290.254	1.10638	0.00786554	0.022	318.008	291.603	0.916968	0.0654529	#	RREB1	AF072826	ras responsive element binding protein 1
217420_s_at	419.063	751.605	0.557557	0.0271597	0.047	452.419	704.378	1.55692	0.0488071		POLR2A	M21610	polymerase (RNA) II (DNA directed) polypeptide A, 220kDa
217493_x_at	540.89	593.255	0.911733	0.0369266	0.047	551.106	583.669	1.05909	0.111717	#	NCR2	AL136967	natural cytotoxicity triggering receptor 2
217507_at	303.957	466.661	0.651344	0.02727	0.081	334.234	454.383	1.35947	0.0743491	#	SLC11A1	AI346187	solute carrier family 11 (proton-coupled divalent metal ion transporters), member 1
217526_at	311.89	352.131	0.885723	0.0391618	0.051	313.733	355.651	1.13361	0.029885		FLJ14639	AI478300	nuclear factor of activated T-cells, cytoplasmic, calcineurin-dependent 2 interacting protein
217545_at	347.341	309.659	1.12169	0.0279429	0.048	352.966	303.706	0.860439	0.0210131		MYH14	AW081820	myosin, heavy polypeptide 14
217585_at	304.314	514.48	0.591498	0.0233413	0	361.426	495.956	1.37222	0.143904	#	NEBL	BE502910	nebulette
217641_at	295.369	471.083	0.627	0.0192605	0.071	344.521	426.023	1.23656	0.187455	#	GPR135	AA634446	G protein-coupled receptor 135
217707_x_at	1640.82	2031.92	0.807523	0.00570753	0.017	1668.74	2051.33	1.22927	0.00217716		SMARCA2	AI535683	SWI/SNF related, matrix associated, actin dependent regulator of chromatin, subfamily a, member 2
217749_at	698.554	641.34	1.08921	0.0370796	0.038	693.582	612.797	0.883524	0.00363429		COPG	NM_016128	coatomer protein complex, subunit gamma
217778_at	746.761	680.357	1.0976	0.0452195	0.057	748.585	655.463	0.875603	0.0499159		SLC39A1	NM_014437	solute carrier family 39 (zinc transporter), member 1
217785_s_at	279.142	385.911	0.723333	0.0410627	0.09	326.001	395.672	1.21371	0.204438	#	YKT6	NM_006555	SNARE protein Ykt6
217786_at	518.982	581.841	0.891965	0.0136795	0.071	573.747	597.333	1.04111	0.626228	#	SKB1	NM_006109	SKB1 homolog (S. pombe)
217790_s_at	349.131	314.474	1.11021	0.0422498	0.062	338.475	316.738	0.935779	0.239405	#	SSR3	NM_007107	signal sequence receptor, gamma (translocon-associated protein gamma)
217792_at	666.429	728.498	0.914799	0.0326756	0.01	674.546	720.622	1.06831	0.0533269	#	SNX5	NM_014426	sorting nexin 5
217793_at	415.961	465.342	0.893882	0.0388613	0.045	429.754	454.258	1.05702	0.250327	#	RAB11B	AL575337	RAB11B, member RAS oncogene family
217831_s_at	672.153	628.279	1.06983	0.0370603	0.044	717.922	669.083	0.931972	0.0758347	#	NSFL1C	NM_016143	NSFL1 (p97) cofactor (p47)
217832_at	478.207	536.891	0.890697	0.0328916	0.032	514.525	564.622	1.09737	0.0650357	#	SYNCRIP	BE672181	synaptotagmin binding, cytoplasmic RNA interacting protein
217834_s_at	357.474	401.609	0.890104	0.0241001	0.041	400.995	437.858	1.09193	0.311177	#	SYNCRIP	NM_006372	synaptotagmin binding, cytoplasmic RNA interacting protein
217836_s_at	818.397	751.704	1.08872	0.0467005	0.019	828.814	796.082	0.960507	0.482498	#	YAP	NM_018253	YY1 associated protein
217841_s_at	586.51	657.673	0.891795	0.0451874	0.065	619.322	673.995	1.08828	0.0536856	#	PME-1	NM_016147	protein phosphatase methylesterase-1
217845_x_at	2092.29	2412.67	0.86721	0.0245894	0.035	2025.79	2380.63	1.17516	0.0168251		HIG1	NM_014056	likely ortholog of mouse hypoxia induced gene 1
217852_s_at	1016.66	1226.19	0.829125	0.0179229	0.036	1039.32	1191.56	1.14647	0.199203	#	ARL10C	NM_018184	ADP-ribosylation factor-like 10C
217895_at	920.569	1102.93	0.834659	0.0191085	0.02	880.527	1136.32	1.2905	0.0049047		FLJ20758	NM_017952	FLJ20758 protein
217918_at	1303.5	1601.15	0.814103	0.0309113	0.054	1377.7	1651.08	1.19843	0.0715857	#	DNCL2A	NM_014183	dynein, cytoplasmic, light polypeptide 2A
217919_s_at	361.764	405.63	0.891857	0.0327197	0.033	353.749	402.84	1.13877	0.0030166		MRPL42	BE782148	mitochondrial ribosomal protein L42
217942_at	1094.11	1225.18	0.893019	0.0362915	0.029	1071.82	1227.5	1.14526	0.0285262		MRPS35	NM_021821	mitochondrial ribosomal protein S35
217961_at	644.899	710.252	0.907986	0.0380988	0.002	627.273	687.004	1.09522	0.060388	#	FLJ20551	NM_017875	hypothetical protein FLJ20551
217973_at	915.386	1119.83	0.817432	0.00406908	0.054	902.274	1134.7	1.2576	0.000268275		DCXR	NM_016286	dicarbonyl/L-xylulose reductase
217982_s_at	3443.43	3697.31	0.931334	0.0435648	0.031	3452.82	3772.72	1.09265	0.0383987		MORF4L1	NM_006791	mortality factor 4 like 1
218024_at	3014.53	3421.39	0.881083	0.0280109	0.021	3041.86	3282.04	1.07896	0.292238	#	BRP44L	NM_016098	brain protein 44-like
218037_at	362.703	436.876	0.830218	0.00234683	0.069	385.212	435.409	1.13031	0.0297315		C2orf17	NM_024293	chromosome 2 open reading frame 17
218046_s_at	492.2	524.746	0.937977	0.0327215	0.034	483.486	534.659	1.10584	0.012248		MRPS16	NM_016065	mitochondrial ribosomal protein S16
218060_s_at	379.173	365.459	1.03752	0.0120716	0.009	380.332	384.664	1.01139	0.826747	#	FLJ13154	NM_024598	hypothetical protein FLJ13154
218069_at	1365.85	1625.74	0.840144	0.015442	0.028	1392.24	1559.78	1.12033	0.0337672		XTP3TPA	NM_024096	XTP3-transactivated protein A
218079_s_at	463.944	519.123	0.893706	0.0121386	0.004	471.873	518.467	1.09874	0.0274618		ZNF403	NM_024835	zinc finger protein 403
218082_s_at	360.57	414.717	0.869434	0.0427974	0.043	393.151	450.106	1.14487	0.0550369	#	UBP1	NM_014517	upstream binding protein 1 (LBP-1a)
218085_at	729.511	1213.75	0.601038	0.0108976	0	807.269	1228.21	1.52144	0.0200932		SNF7DC2	NM_015961	SNF7 domain containing 2
218167_at	1055.02	1205.44	0.875216	0.0267732	0.021	1042.62	1234.83	1.18435	0.00211035		LOC51321	NM_016627	hypothetical protein LOC51321
218212_s_at	676.461	762.316	0.887375	0.0111729	0.034	664.212	756.605	1.1391	0.0275515		MOCS2	NM_004531	molybdenum cofactor synthesis 2
218226_s_at	5989.3	6356.51	0.942231	0.0373213	0.042	5925.21	6224.72	1.05055	0.272263	#	NDUFB4	NM_004547	NADH dehydrogenase (ubiquinone) 1 beta subcomplex, 4, 15kDa
218278_at	398.304	437.493	0.910425	0.0455803	0.027	431.451	444.643	1.03058	0.563196	#	FLJ10439	NM_018093	hypothetical protein FLJ10439
218280_x_at	416.424	328.929	1.266	0.0466365	0.025	373.187	316.554	0.848245	0.00414881		HIST2H2AA	NM_003516	histone 2, H2aa
218281_at	550.32	599.197	0.91843	0.0313709	0.067	531.428	582.77	1.09661	0.039836		MRPL48	NM_016055	mitochondrial ribosomal protein L48
218289_s_at	447.727	525.82	0.851484	0.0248797	0.068	439.888	491.866	1.11816	0.0152107		UBE1DC1	NM_024818	ubiquitin-activating enzyme E1-domain containing 1
218317_x_at	541.876	501.033	1.08152	0.00485521	0.029	560.008	495.329	0.884503	0.0118084		MGC5178	NM_024044	hypothetical protein MGC5178
218343_s_at	454.308	599.106	0.75831	0.0334979	0.051	474.565	586.947	1.23681	0.061615	#	GTF3C3	NM_012086	general transcription factor IIIC, polypeptide 3, 102kDa
218379_at	382.337	422.323	0.905318	0.0197161	0.044	370.085	427.174	1.15426	0.00186334		RBM7	NM_016090	RNA binding motif protein 7
218381_s_at	343.137	400.4	0.856985	0.0121018	0.058	355.916	402.285	1.13028	0.131837	#	U2AF2	NM_007279	U2 (RNU2) small nuclear RNA auxiliary factor 2
218382_s_at	419.348	387.421	1.08241	0.0248498	0.049	424.993	397.256	0.934735	0.0790302	#	U2AF2	NM_007279	U2 (RNU2) small nuclear RNA auxiliary factor 2
218387_s_at	583.687	481.075	1.2133	0.0220322	0.026	525.381	477.493	0.90885	0.224822	#	PGLS	NM_012088	6-phosphogluconolactonase
218424_s_at	516.835	599.789	0.861694	0.0113575	0.031	674.644	698.032	1.03467	0.716697	#	TSAP6	NM_018234	dudulin 2
218455_at	347.338	375.486	0.925035	0.0443625	0.062	356.248	380.168	1.06715	0.115461	#	NFS1	NM_021100	NFS1 nitrogen fixation 1 (S. cerevisiae)
218549_s_at	496.074	540.37	0.918025	0.0216773	0.019	506.444	549.762	1.08553	0.0378589		CGI-90	NM_016033	CGI-90 protein
218561_s_at	306.312	337.581	0.907374	0.0131695	0.075	338.677	357.321	1.05505	0.221195	#	C6orf149	NM_020408	chromosome 6 open reading frame 149
218608_at	371.514	345.236	1.07612	0.0353809	0	376.422	349.821	0.929332	0.0554636	#	HSA9947	NM_022089	putative ATPase
218622_at	343.386	376.959	0.910937	0.00707405	0.019	350.197	366.589	1.04681	0.226362	#	NUP37	NM_024057	nucleoporin 37kDa
218641_at	334.055	366.548	0.911355	0.0417126	0.079	331.401	383.761	1.158	0.00565109		MGC3032	NM_023941	hypothetical protein MGC3032
218669_at	285.467	319.474	0.893551	0.0247387	0.047	306.997	338.17	1.10154	0.0649936	#	RAP2C	NM_021183	RAP2C, member of RAS oncogene family
218693_at	357.783	320.232	1.11726	0.0411252	0.055	360.661	331.884	0.920209	0.13764	#	TM4SF15	NM_012339	transmembrane 4 superfamily member 15
218711_s_at	340.115	317.936	1.06976	0.0279517	0	340.971	309.2	0.90682	0.037121		SDPR	NM_004657	serum deprivation response (phosphatidylserine binding protein)
218716_x_at	320.034	352.212	0.90864	0.00677087	0.014	329.29	341.328	1.03656	0.333477	#	MTO1	NM_012123	mitochondrial translation optimization 1 homolog (S. cerevisiae)
218741_at	378.195	300.78	1.25738	0.0125835	0.049	345.415	312.244	0.903966	0.126649	#	C22orf18	NM_024053	chromosome 22 open reading frame 18
218758_s_at	396.933	360.213	1.10194	0.0223995	0.03	385.485	356.435	0.924639	0.0602958	#	D21S2056E	NM_003683	DNA segment on chromosome 21 (unique) 2056 expressed sequence
218779_x_at	432.425	387.922	1.11472	0.0479611	0.049	405.29	367.841	0.9076	0.0882203	#	EPS8L1	NM_017729	EPS8-like 1
218793_s_at	292.348	325.921	0.896989	0.0196888	0.057	273.762	319.997	1.16889	0.000313878		SCML1	NM_006746	sex comb on midleg-like 1 (Drosophila)
218821_at	693.506	633.452	1.0948	0.0121885	0.024	643.824	613.468	0.95285	0.0940621	#	NPEPL1	AL139349	aminopeptidase-like 1
218825_at	514.122	475.786	1.08057	0.0289779	0.045	504.118	473.472	0.939207	0.0177687		EGFL7	NM_016215	EGF-like-domain, multiple 7
218861_at	379.103	350.687	1.08103	0.04117	0.022	353.136	338.903	0.959696	0.40491	#	RNF25	NM_022453	ring finger protein 25
218910_at	309.656	292.873	1.0573	0.0119133	0.047	302.827	287.119	0.948127	0.215787	#	FLJ10375	NM_018075	hypothetical protein FLJ10375
218949_s_at	562.962	614.482	0.916158	0.0357646	0.121	553.885	612.085	1.10508	0.0572033	#	QRSL1	NM_018292	glutaminyl-tRNA synthase (glutamine-hydrolyzing)-like 1
218979_at	290.339	313.492	0.926144	0.0353402	0.025	291.52	317.315	1.08849	0.0183202		C9orf76	NM_024945	chromosome 9 open reading frame 76
218991_at	567.747	526.514	1.07831	0.0376035	0.042	552.198	518.687	0.939314	0.0964325	#	ABC1	NM_022070	amplified in breast cancer 1
218999_at	447.673	350.272	1.27807	0.0198782	0.045	394.682	355.131	0.899789	0.304623	#	FLJ11000	NM_018295	hypothetical protein FLJ11000
219002_at	290.294	345.953	0.839114	0.0451472	0.022	296.706	340.355	1.14711	0.190615	#	FLJ21901	NM_024622	hypothetical protein FLJ21901
219064_at	440.137	388.164	1.13389	0.0129124	0.006	436.263	390.902	0.896023	0.0957566	#	ITIH5	NM_030569	inter-alpha (globulin) inhibitor H5
219076_s_at	788.879	876.977	0.899543	0.0284028	0.063	774.811	834.35	1.07684	0.0883957	#	PXMP2	NM_018663	peroxisomal membrane protein 2, 22kDa
219092_s_at	472.53	415.675	1.13678	0.0231747	0.045	455.352	422.398	0.92763	0.0493906		C9orf12	NM_022755	chromosome 9 open reading frame 12
219113_x_at	447.048	408.846	1.09344	0.0101391	0.024	439.955	393.425	0.894239	0.0127524		DHRS10	NM_016246	dehydrogenase/reductase (SDR family) member 10
219158_s_at	375.211	429.629	0.873337	0.0233872	0.031	391.329	464.827	1.18781	0.0161156		TBDN100	NM_025085	transcriptional coactivator tubedown-100
219185_at	418.991	476.831	0.878698	0.0330677	0.045	396.675	456.028	1.14963	0.0353554		SIRT5	NM_012241	sirtuin (silent mating type information regulation 2 homolog) 5 (S. cerevisiae)
219186_at	338.463	381.349	0.887542	0.00490198	0.075	361.057	391.083	1.08316	0.130254	#	ZBTB7	NM_020224	zinc finger and BTB domain containing 7
219206_x_at	1223.44	1093.42	1.11891	0.0487255	0.07	1210.8	1129.41	0.932781	0.228522	#	CGI-119	NM_016056	CGI-119 protein
219249_s_at	379.858	352.438	1.0778	0.0383361	0.033	387.288	345.414	0.891877	0.00800221		FKBP10	NM_021939	FK506 binding protein 10, 65 kDa
219349_s_at	299.856	472.589	0.634496	0.0269788	0.087	336.858	456.712	1.3558	0.0996079	#	SEC5L1	NM_018303	SEC5-like 1 (S. cerevisiae)
219350_s_at	910.732	1169.23	0.778914	0.0502414	0.104	932.856	1052.66	1.12842	0.208659	#	DIABLO	NM_019887	diablo homolog (Drosophila)
219417_s_at	550.899	476.756	1.15552	0.00436152	0.029	525.976	437.372	0.831544	0.00496739		FLJ20014	NM_017622	hypothetical protein FLJ20014
219451_at	627.042	725.125	0.864735	0.0489323	0.073	616.396	737.122	1.19586	0.00237454		MSRB	NM_016064	methionine sulfoxide reductase B
219520_s_at	548.475	499.958	1.09704	0.0140009	0.01	540.769	490.716	0.907442	0.00272887		KIAA1280	NM_018458	KIAA1280 protein
219521_at	377.104	334.598	1.12704	0.0452029	0.031	351.716	318.275	0.904921	0.0639023	#	B3GAT1	NM_018644	beta-1,3-glucuronyltransferase 1 (glucuronosyltransferase P)
219525_at	528.611	632.823	0.835322	0.0348327	0.059	562.09	601.662	1.0704	0.328483	#	FLJ10847	NM_018242	hypothetical protein FLJ10847
219550_at	395.822	366.963	1.07864	0.0158529	0.035	378.369	366.076	0.967511	0.292446	#	ROBO3	NM_022370	roundabout, axon guidance receptor, homolog 3 (Drosophila)
219620_x_at	313.868	288.355	1.08848	0.000594513	0.031	300.422	281.19	0.935983	0.026042		FLJ20245	NM_017723	hypothetical protein FLJ20245
219637_at	351.766	610.882	0.575833	0.0232132	0.068	401.64	605.242	1.50693	0.0610131	#	FLJ12584	NM_025139	hypothetical protein FLJ12584
219641_at	443.495	503.402	0.880996	0.0169824	0.025	437.534	476.356	1.08873	0.0592507	#	DET1	NM_017996	de-etiolated 1
219646_at	390.349	352.447	1.10754	0.00964128	0.036	382.91	341.632	0.892198	0.00364231		FLJ20186	NM_017702	hypothetical protein FLJ20186
219692_at	366.503	336.016	1.09073	0.00548835	0.033	347.047	326.609	0.941109	0.163256	#	KREMEN2	NM_024507	kringle containing transmembrane protein 2
219698_s_at	318.447	299.303	1.06396	0.031734	0.014	313.643	296.139	0.944193	0.180851	#	METTL4	NM_022840	methyltransferase like 4
219763_at	329.784	285.545	1.15493	0.00101565	0.073	306.58	279.737	0.912441	0.065912	#	KIAA1608	NM_024820	KIAA1608
219784_at	441.252	409.079	1.07865	0.0398697	0.002	430.495	400.366	0.930013	0.0494178		FBXO31	NM_024735	F-box protein 31
219802_at	296.961	350.807	0.84651	0.0312419	0	308.924	363.884	1.17791	0.0145093		FLJ22028	NM_024854	hypothetical protein FLJ22028
219812_at	354.303	562.959	0.629359	0.0268691	0.05	386.569	532.41	1.37727	0.0919936	#	STAG3	NM_024070	stromal antigen 3
219826_at	293.701	347.747	0.844581	0.00954325	0.057	289.787	336.015	1.15952	0.00710052		FLJ23233	NM_024691	hypothetical protein FLJ23233
219827_at	1437.14	638.411	2.25112	0.00551454	0.003	624.31	525.148	0.841165	0.196824	#	UCP3	NM_003356	uncoupling protein 3 (mitochondrial, proton carrier)
219877_at	405.729	360.769	1.12462	0.0215301	0.029	381.636	354.124	0.927912	0.115329	#	FLJ13842	NM_024645	hypothetical protein FLJ13842
219878_s_at	320.833	349.169	0.918847	0.0478475	0	337.793	369.765	1.09465	0.298016	#	KLF13	NM_015995	Kruppel-like factor 13
219904_at	594.127	460.358	1.29057	0.019996	0.069	552.383	466.34	0.844233	0.0137855		ZSCAN5	NM_024303	zinc finger and SCAN domain containing 5
219942_at	459.737	412.509	1.11449	0.0245509	0	457.543	415.28	0.90763	0.0187508		MYL7	NM_021223	myosin, light polypeptide 7, regulatory
219961_s_at	533.236	471.61	1.13067	0.0156193	0	491.228	477.193	0.971429	0.457579	#	C20orf19	NM_018474	chromosome 20 open reading frame 19
219996_at	347.248	316.389	1.09754	0.0305755	0.045	337.662	312.982	0.926911	0.132739	#	ASB7	NM_024708	ankyrin repeat and SOCS box-containing 7
219999_at	414.292	378.672	1.09407	0.00746606	0.007	378.115	360.998	0.954733	0.309003	#	MAN2A2	NM_018621	mannosidase, alpha, class 2A, member 2
220056_at	534.277	477.902	1.11796	0.0399517	0.046	530.438	452.329	0.852746	0.00163912		IL22RA1	NM_021258	interleukin 22 receptor, alpha 1
220067_at	418.536	394.049	1.06214	0.0442321	0.022	407.916	382.121	0.936765	0.137146	#	SPTBN5	NM_016642	spectrin, beta, non-erythrocytic 5
220096_at	396.409	345.917	1.14597	0.0294548	0.026	380.541	332.135	0.872799	0.0404145		RNASET2	NM_017795	ribonuclease T2
220179_at	326.919	424.639	0.769876	0.0384456	0	350.232	425.865	1.21595	0.118832	#	DPEP3	NM_022357	dipeptidase 3
220182_at	469.613	424.153	1.10718	0.00184501	0.023	441.412	398.359	0.902465	0.00671137		SLC25A23	NM_024103	solute carrier family 25 (mitochondrial carrier; phosphate carrier), member 23
220203_at	358.735	336.3	1.06671	0.0325582	0.035	352.144	321.065	0.911745	0.00544086		FLJ14351	NM_024732	hypothetical protein FLJ14351
220210_at	326.882	293.725	1.11289	0.0352848	0.017	322.037	295.091	0.916324	0.1421	#	CHRNA10	NM_020402	cholinergic receptor, nicotinic, alpha polypeptide 10
220212_s_at	328.497	309.416	1.06167	0.040135	0.052	332.979	307.8	0.924381	0.0197539		THADA	NM_022065	thyroid adenoma associated
220231_at	387.504	351.604	1.1021	0.0306681	0.016	359.179	342.572	0.953764	0.185962	#	C7orf16	NM_006658	chromosome 7 open reading frame 16
220237_at	411.666	451.68	0.911413	0.0197126	0.007	434.38	440.677	1.0145	0.724904	#	APG3L	NM_022488	APG3 autophagy 3-like (S. cerevisiae)
220249_at	511.097	587.556	0.86987	0.0241719	0.001	501.173	548.758	1.09495	0.302013	#	HYAL4	NM_012269	hyaluronoglucosaminidase 4
220271_x_at	313.828	296.286	1.05921	0.00222528	0.063	312.374	291.346	0.932686	0.0156565		FLJ23588	NM_022785	CAP-binding protein complex interacting protein 1
220288_at	492.268	449.426	1.09532	0.0173149	0.027	513.512	440.715	0.858237	0.00058022		MYO15A	NM_016239	myosin XVA
220296_at	681.941	787.558	0.865893	0.0442091	0.017	693.264	780.484	1.12581	0.190246	#	GALNT10	NM_024564	UDP-N-acetyl-alpha-D-galactosamine:polypeptide N-acetylgalactosaminyltransferase 10 (GalNAc-T10)
220303_at	311.743	293.638	1.06166	0.044654	0.018	309.877	293.225	0.946264	0.0959526	#	PDZK2	NM_024791	PDZ domain containing 2
220305_at	343.617	386.596	0.888829	0.00257339	0	336.674	350.826	1.04203	0.365916	#	MGC3260	NM_024030	Hypothetical protein MGC3260
220331_at	619.081	514.73	1.20273	0.0108001	0.035	581.642	547.841	0.941887	0.388712	#	CYP46A1	NM_006668	cytochrome P450, family 46, subfamily A, polypeptide 1
220357_s_at	419.546	383.252	1.0947	0.0341478	0.027	386.464	377.795	0.977567	0.46778	#	SGK2	NM_016276	serum/glucocorticoid regulated kinase 2
220367_s_at	334.455	358.358	0.933299	0.0469685	0.042	355.932	363.572	1.02146	0.418032	#	SAP130	NM_024545	mSin3A-associated protein 130
220420_at	624.984	574.263	1.08832	0.0369469	0.044	669.342	584.983	0.873967	0.0068776		LMAN1L	NM_021819	lectin, mannose-binding, 1 like
220428_at	320.172	293.251	1.0918	0.0205574	0.057	318.626	279.626	0.8776	6.24872e-05		CD207	NM_015717	CD207 antigen, langerin
220439_at	379.137	321.385	1.1797	0.0102072	0.035	370.459	322.968	0.871804	0.0218807		RIN3	NM_024892	Ras and Rab interactor 3
220464_at	600.644	558.761	1.07496	0.0363399	0.079	586.401	562.401	0.959072	0.0293326		MCF2L	NM_024979	MCF.2 cell line derived transforming sequence-like
220501_at	879.556	678.558	1.29621	0.00831556	0.036	852.695	656.028	0.769358	0.000566722		ACTL7A	NM_006687	actin-like 7A
220573_at	335.871	462.126	0.726794	0.0458726	0.053	370.079	437.124	1.18117	0.256448	#	KLK14	NM_022046	kallikrein 14
220685_at	331.96	286.659	1.15803	0.0487363	0.014	324.663	297.605	0.91666	0.0866978	#	CXorf17	NM_017848	chromosome X open reading frame 17
220705_s_at	386.823	352.352	1.09783	0.0337666	0.05	376.69	360.478	0.95696	0.346235	#	ADAMTS7	NM_014272	a disintegrin-like and metalloprotease (reprolysin type) with thrombospondin type 1 motif, 7
220706_at	669.642	538.863	1.2427	0.00186536	0.05	616.201	527.553	0.856137	0.011028		ADAMTS7	NM_014272	a disintegrin-like and metalloprotease (reprolysin type) with thrombospondin type 1 motif, 7
220716_at	362.845	403.723	0.898746	0.0490895	0.053	360.518	373.843	1.03696	0.309127	#	FLJ12595	NM_024994	hypothetical protein FLJ12595
220773_s_at	301.105	322.326	0.934163	0.0350734	0.029	325.831	330.349	1.01387	0.571334	#	GPHN	NM_020806	gephyrin
220790_s_at	253.282	392.619	0.64511	0.00243045	0.045	281.291	373.778	1.32879	0.00340773		MS4A5	NM_023945	membrane-spanning 4-domains, subfamily A, member 5
220894_x_at	376.675	346.175	1.08811	0.0129419	0.059	372.476	346.648	0.930658	0.0973122	#	PRDM12	NM_021619	PR domain containing 12
220925_at	416.788	474.3	0.878744	0.0176759	0.073	400.263	470.152	1.17461	0.00187814		MAK10	NM_021929	MAK10 homolog, amino-acid N-acetyltransferase subunit, (S. cerevisiae)
220935_s_at	706.539	657.465	1.07464	0.0311069	0.038	699.088	667.773	0.955205	0.0818822	#	CDK5RAP2	NM_018249	CDK5 regulatory subunit associated protein 2
221009_s_at	383.188	331.843	1.15472	0.0265369	0.025	377.464	332.315	0.88039	0.0554121	#	ANGPTL4	NM_016109	angiopoietin-like 4
221027_s_at	462.446	517.767	0.893154	0.0146256	0.04	428.818	484.718	1.13036	0.0196116		PLA2G12A	NM_030821	phospholipase A2, group XIIA /// phospholipase A2, group XIIA
221067_s_at	638.262	559.856	1.14005	0.0384901	0.044	592.412	561.683	0.948128	0.410062	#	MGC10946	NM_030572	hypothetical protein MGC10946
221175_at	374.604	460.002	0.814354	0.0448329	0.03	392.684	444.831	1.1328	0.0800654	#	FLJ22173	NM_025041	hypothetical protein FLJ22173
221188_s_at	371.099	444.445	0.834972	0.0344635	0.04	365.994	422.432	1.15421	0.041351		CIDEB	NM_014430	cell death-inducing DFFA-like effector b
221192_x_at	362.163	337.528	1.07299	0.0406527	0	357.649	337.69	0.944194	0.21237	#	ET	NM_024311	hypothetical protein ET
221270_s_at	348.127	320.118	1.0875	0.0399537	0.041	358.504	314.188	0.876387	0.0110951		QTRT1	NM_031209	queuine tRNA-ribosyltransferase 1 (tRNA-guanine transglycosylase) /// queuine tRNA-ribosyltransferase 1 (tRNA-guanine transglycosylase)
221274_s_at	466.685	521.216	0.895377	0.00232855	0.054	500.571	526.218	1.05123	0.0816509	#	LMAN2L	NM_030805	lectin, mannose-binding 2-like /// lectin, mannose-binding 2-like
221391_at	347.833	571.14	0.609016	0.0401213	0.075	407.16	551.794	1.35523	0.114015	#	TAS2R14	NM_023922	taste receptor, type 2, member 14
221428_s_at	403.137	448.775	0.898305	0.0292492	0.053	415.504	479.64	1.15436	0.0160913		TBL1XR1	NM_030921	transducin (beta)-like 1X-linked receptor 1 /// transducin (beta)-like 1X-linked receptor 1
221463_at	336.134	289.67	1.1604	0.00860423	0.041	323.743	291.415	0.900145	0.0249383		CCL24	NM_002991	chemokine (C-C motif) ligand 24
221468_at	379.303	346.834	1.09362	0.0326515	0.034	368.851	348.023	0.943533	0.0276986		XCR1	NM_005283	chemokine (C motif) receptor 1
221471_at	901.211	824.669	1.09282	0.0173605	0.043	886.837	823.395	0.928463	0.0583365	#	TDE1	AW173623	tumor differentially expressed 1
221481_x_at	1324.68	1467.71	0.90255	0.0145544	0.025	1461.76	1547.25	1.05848	0.245708	#	HNRPD	D55672	heterogeneous nuclear ribonucleoprotein D (AU-rich element RNA binding protein 1, 37kDa)
221483_s_at	1015.59	1144.88	0.887068	0.0329923	0.091	1107.84	1187.24	1.07167	0.258095	#	ARPP-19	AF084555	cyclic AMP phosphoprotein, 19 kD
221484_at	913.152	1122.69	0.813357	0.0474439	0.013	1098.35	1157.78	1.05412	0.656181	#	B4GALT5	BF691447	UDP-Gal:betaGlcNAc beta 1,4- galactosyltransferase, polypeptide 5
221505_at	856.491	1011.83	0.846477	0.00643207	0.006	837.692	1050.04	1.25349	0.00445767		ANP32E	AW612574	acidic (leucine-rich) nuclear phosphoprotein 32 family, member E
221516_s_at	366.881	414.735	0.884617	0.0327093	0.035	387.233	416.403	1.07533	0.0690889	#	FLJ20232	BC002587	hypothetical protein FLJ20232
221535_at	414.898	440.611	0.941641	0.0479613	0	420.505	432.094	1.02756	0.433393	#	FLJ11301	AL136897	hypothetical protein FLJ11301
221548_s_at	371.962	406.853	0.91424	0.0385631	0	380.593	404.175	1.06196	0.177194	#	ILKAP	AY024365	integrin-linked kinase-associated serine/threonine phosphatase 2C
221559_s_at	301.053	342.697	0.878482	0.0191899	0.041	310.662	343.546	1.10585	0.0182253		MIS12	BC000229	MIS12 homolog (yeast)
221573_at	371.793	349.526	1.06371	0.0337212	0.033	360.301	342.855	0.95158	0.101512	#	C7orf25	BC000769	chromosome 7 open reading frame 25
221587_s_at	898.571	736.331	1.22034	0.0306664	0.051	823.029	692.052	0.840859	0.063872	#	C19orf24	BC000890	chromosome 19 open reading frame 24
221588_x_at	470.615	677.039	0.695108	0.00220104	0.017	447.433	661.847	1.47921	0.000718132		ALDH6A1	AI640855	aldehyde dehydrogenase 6 family, member A1
221589_s_at	357.768	602.866	0.593444	0.000350582	0.045	327.106	597.111	1.82544	0.000248376		---	AW612403	---
221602_s_at	558.482	508.032	1.09931	0.047163	0.014	555.094	494.501	0.890842	0.00165415		TOSO	AF057557	regulator of Fas-induced apoptosis /// regulator of Fas-induced apoptosis
221603_at	349.293	274.283	1.27348	0.00723167	0.059	290.877	268.872	0.924349	0.0289983		PEX16	BC000467	peroxisomal biogenesis factor 16
221609_s_at	359.516	340.655	1.05537	0.0494716	0.018	354.036	336.568	0.950659	0.108866	#	WNT6	AY009401	wingless-type MMTV integration site family, member 6
221611_s_at	522.509	483.642	1.08036	0.0134856	0.055	528.617	479.813	0.907677	0.0292837		PHF7	AY014283	PHD finger protein 7
221655_x_at	454.792	403.877	1.12606	0.0252906	0.036	442.907	376.815	0.850777	0.0074181		EPS8L1	AF282167	EPS8-like 1
221669_s_at	437.252	486.004	0.899689	0.0367663	0.044	457.802	499.124	1.09026	0.0504944	#	ACAD8	BC001964	acyl-Coenzyme A dehydrogenase family, member 8
221682_s_at	323.427	459.723	0.703526	0.0464377	0.069	351.512	457.058	1.30026	0.126639	#	PCDHGB6	AF135156	protocadherin gamma subfamily B, 6
221727_at	880.065	1004.03	0.876533	0.0136957	0.038	886.628	991.167	1.11791	0.106704	#	PC4	AA456973	activated RNA polymerase II transcription cofactor 4
221736_at	331.737	364.735	0.909529	0.00996593	0.048	343.122	356.597	1.03927	0.215798	#	KIAA1219	AA156777	KIAA1219 protein /// KIAA1219 protein
221756_at	572.448	512.073	1.1179	0.0308093	0.045	489.762	470.405	0.960476	0.353537	#	MGC17330	AL540260	HGFL gene /// HGFL gene
221797_at	357.028	325.835	1.09573	0.0238806	0.017	344.274	320.748	0.931665	0.19318	#	LOC339229	AY007126	hypothetical protein LOC339229
221810_at	339.96	355.112	0.957331	0.0295579	0.034	390.228	367.791	0.942501	0.547277	#	RAB15	AA631242	RAB15, member RAS onocogene family
221846_s_at	351.657	391.002	0.899375	0.0221165	0.009	373.002	407.357	1.0921	0.00296357		CASKIN2	AI970096	CASK interacting protein 2
221877_at	683.652	645.221	1.05956	0.0274885	0.024	665.354	640.165	0.962143	0.231567	#	---	BF508835	Similar to FKSG27
221881_s_at	423.465	763.507	0.554632	0.0167352	0.023	503.741	733.507	1.45612	0.0644417	#	CLIC4	AI638420	chloride intracellular channel 4
221883_at	545.935	483.511	1.12911	0.00414248	0.04	552.216	461.228	0.835231	4.97961e-05		PKNOX1	AA133342	PBX/knotted 1 homeobox 1
221890_at	866.822	765.707	1.13205	0.00937465	0.036	832.238	767.496	0.922207	0.0742238	#	ZNF335	NM_022095	zinc finger protein 335
221901_at	487.942	458.442	1.06435	0.04067	0.012	485.99	448.889	0.92366	0.0441081		KIAA1644	BF516072	KIAA1644 protein
221931_s_at	281.482	326.439	0.86228	0.0359902	0.115	308.232	340.219	1.10378	0.479499	#	SEH1L	AV701173	SEH1-like (S. cerevisiae)
221941_at	464.142	405.264	1.14528	0.00557545	0.084	465.491	405.793	0.871752	0.0266847		PAOX	BE646315	polyamine oxidase (exo-N4-amino)
221943_x_at	2281.06	1580.64	1.44312	0.000123665	0.037	2075	1664.51	0.802172	0.00395955		---	AW303136	---
221947_at	445.504	398.829	1.11703	0.00722021	0.031	431.59	403.526	0.934977	0.0179129		IL17RC	BF112057	interleukin 17 receptor C
221953_s_at	551.051	483.883	1.13881	0.0157792	0	535.06	484.946	0.90634	0.0433378		---	W45551	Hypothetical LOC400843
221954_at	467.141	636.178	0.734292	0.0192692	0.045	484.197	618.45	1.27727	0.0693935	#	---	AA160474	---
222000_at	309.315	339.55	0.910956	0.0437481	0.03	324.612	350.63	1.08015	0.0870844	#	LOC339448	AI915947	hypothetical protein LOC339448
222010_at	560.412	629.049	0.890887	0.0362021	0.039	566.17	624.34	1.10274	0.0354639		TCP1	BF224073	t-complex 1
222011_s_at	498.681	558.75	0.892494	0.00322835	0.055	525.594	573.504	1.09115	0.0312221		TCP1	BF224073	t-complex 1
222014_x_at	285.363	317.601	0.898494	0.0412605	0	278.311	302.297	1.08618	0.0667702	#	MTO1	AI249752	mitochondrial translation optimization 1 homolog (S. cerevisiae)
222017_x_at	330.87	293.421	1.12763	0.000602915	0	326.048	296.144	0.908284	0.0151297		LRCH4	AI660075	leucine-rich repeats and calponin homology (CH) domain containing 4
222040_at	517.796	470.736	1.09997	0.0474738	0.066	529.3	460.768	0.870524	0.00113674		HNRPA1	AI144007	heterogeneous nuclear ribonucleoprotein A1
222047_s_at	478.303	539.355	0.886804	0.0469029	0.058	541.163	548.443	1.01345	0.875001	#	ARS2	AI523895	arsenate resistance protein ARS2
222056_s_at	484.705	584.96	0.828613	0.00993652	0.032	485.042	563.487	1.16173	0.0165036		FAHD2A	AA723370	fumarylacetoacetate hydrolase domain containing 2A
222087_at	366.914	327.576	1.12009	0.0042965	0.024	344.385	317.137	0.92088	0.058581	#	---	AW451806	---
222089_s_at	582.255	508.539	1.14495	0.00503256	0.056	570.284	493.342	0.865081	0.00584774		LOC146562	BF508774	hypothetical protein AF447587
222119_s_at	718.443	809.021	0.88804	0.0137341	0.007	702.211	830.71	1.18299	0.0013		FBXO11	AL117620	F-box protein 11
222151_s_at	342.12	389.612	0.878103	0.0482076	0.03	346.565	389.419	1.12365	0.0655199	#	Cep63	AK023738	centrosome protein Cep63
222165_x_at	360.011	332.966	1.08122	0.0282146	0.02	355.61	349.44	0.982651	0.508572	#	C9orf16	AK022885	chromosome 9 open reading frame 16
222199_s_at	421.608	388.594	1.08496	0.0054183	0.104	414.243	377.851	0.912146	0.016695		BIN3	AK001289	bridging integrator 3
222206_s_at	343.723	323.373	1.06293	0.0202081	0.035	340.592	312.436	0.917333	0.0162735		NICALIN	AA781143	nicastrin-like protein
222275_at	527.6	592.591	0.890327	0.0183725	0.029	533.108	604.5	1.13392	0.0306424		MRPS30	AI039469	Mitochondrial ribosomal protein S30
222295_x_at	659.821	587.475	1.12315	0.045804	0.045	675.976	609.403	0.901516	0.189721	#	FLJ39639	AI732770	Hypothetical protein FLJ39639
222349_x_at	301.09	337.499	0.892121	0.0177896	0.03	322.242	314.018	0.97448	0.521298	#	RNF126P1	AW303476	ring finger protein 126 pseudogene 1
222352_at	414.497	394.868	1.04971	0.0353176	0	410.619	385.557	0.938964	0.0353399		---	BE465371	---
222403_at	427.243	489.318	0.873139	0.00190371	0.02	429.075	496.115	1.15624	0.000899404		MTCH2	AV756532	mitochondrial carrier homolog 2 (C. elegans)
222457_s_at	496.193	423.226	1.17241	0.0115683	0.039	480.249	426.2	0.887457	0.0225596		EPLIN	BC001247	epithelial protein lost in neoplasm beta
222459_at	523.517	574.536	0.911199	0.0374473	0.041	544.214	604.353	1.11051	0.0700074	#	---	BG109865	---
222476_at	302.158	451.678	0.668968	0.0152702	0.029	359.998	421.664	1.1713	0.193916	#	KIAA1194	AA633196	carbon catabolite repression 4 protein
222478_at	506.898	586.438	0.864367	0.00640788	0.082	532.271	611.555	1.14896	0.0133002		C13orf9	AL576924	chromosome 13 open reading frame 9
222482_at	271.788	337.83	0.804511	0.0137555	0.027	301.68	339.24	1.1245	0.0541763	#	SSBP3	AA102468	single stranded DNA binding protein 3
222490_at	362.087	420.959	0.860146	0.00843704	0	369.575	406.633	1.10027	0.0455755		POLR3E	AK023160	polymerase (RNA) III (DNA directed) polypeptide E (80kD)
222500_at	353.387	392.135	0.901186	0.0371251	0.036	364.929	395.986	1.0851	0.0703438	#	PPIL1	BC003048	peptidylprolyl isomerase (cyclophilin)-like 1
222521_x_at	890.557	808.163	1.10195	0.0199054	0.035	878.895	812.422	0.924368	0.0444522		NDUFC2	AL040789	NADH dehydrogenase (ubiquinone) 1, subcomplex unknown, 2, 14.5kDa
222531_s_at	446.766	495.172	0.902244	0.0123834	0.089	467.432	504.464	1.07922	0.0604863	#	C14orf108	AW137526	chromosome 14 open reading frame 108
222534_s_at	373.328	324.589	1.15015	0.0254342	0.03	360.602	298.739	0.828445	0.0088878		C14orf173	AI391455	chromosome 14 open reading frame 173
222560_at	312.716	291.149	1.07408	0.0428968	0.078	315.011	277.385	0.880558	0.00554644		LANCL2	AI363001	LanC lantibiotic synthetase component C-like 2 (bacterial)
222565_s_at	332.385	360.321	0.922468	0.0370283	0.086	331.882	368.985	1.11179	0.0835582	#	PRKD3	BF978541	protein kinase D3
222570_at	505.089	468.224	1.07873	0.021494	0.054	493.148	445.812	0.904012	0.00735811		FREQ	AA045247	frequenin homolog (Drosophila)
222599_s_at	439.681	404.445	1.08712	0.0250593	0.054	439.796	403.32	0.917062	0.00203661		NAV2	AU137607	neuron navigator 2
222613_at	378.333	412.205	0.917826	0.0361686	0.023	379.393	394.046	1.03862	0.298225	#	C12orf4	AA195410	chromosome 12 open reading frame 4
222641_s_at	887.231	746.061	1.18922	0.0106715	0.059	801.381	736.225	0.918695	0.121673	#	FLJ10700	AW083482	hypothetical protein FLJ10700
222675_s_at	394.677	363.868	1.08467	4.11074e-05	0.048	379.164	358.889	0.946528	0.0188899		LOC55971	AA628400	insulin receptor tyrosine kinase substrate
222683_at	586.42	662.923	0.884597	0.00878987	0.043	572.583	653.314	1.14099	0.00160989		RNF20	AK022532	ring finger protein 20
222686_s_at	495.488	441.947	1.12115	0.0438764	0.039	494.558	442.234	0.8942	0.0166636		FLJ11151	AL572407	hypothetical protein FLJ11151
222708_s_at	350.514	386.867	0.906033	0.0322367	0	347.125	388.443	1.11903	0.00977766		STX17	AW014619	syntaxin 17
222718_at	394.609	380.313	1.03759	0.0438673	0.002	391.466	369.463	0.943795	0.0593551	#	TMEM8	BC004276	transmembrane protein 8 (five membrane-spanning domains)
222723_at	418.012	351.545	1.18907	0.0262165	0.02	422.995	331.648	0.784046	0.00234973		WARP	AW292148	von Willebrand factor A domain-related protein
222741_s_at	426.844	392.716	1.0869	0.0154053	0.042	428.509	382.959	0.893702	0.0131942		C6orf64	AI761426	chromosome 6 open reading frame 64
222744_s_at	422.407	457.641	0.923011	0.0113061	0	418.197	444.558	1.06303	0.117357	#	TMLHE	AI635160	trimethyllysine hydroxylase, epsilon
222760_at	1333.6	1662.54	0.802148	0.00193316	0.036	1516.72	1811.53	1.19437	0.0225622		FLJ14299	BG290193	hypothetical protein FLJ14299
222783_s_at	356.994	324.537	1.10001	0.00803691	0.043	348.385	308.215	0.884696	0.000148104		SMOC1	BF516292	SPARC related modular calcium binding 1
222784_at	728.741	665.061	1.09575	0.00310223	0.063	735.696	670.058	0.91078	0.00200505		---	AJ249900	---
222801_s_at	332.597	290.759	1.14389	0.0272105	0	330.37	290.77	0.880135	0.143974	#	FLJ13195	BF056088	hypothetical protein FLJ13195 similar to stromal antigen 3
222849_s_at	336.197	524.641	0.640814	0.00629267	0.001	363.327	533.662	1.46882	0.0175382		SCRN3	AI306487	secernin 3
222879_s_at	414.818	363.698	1.14056	0.020407	0.045	394.029	356.922	0.905827	0.00396555		POLH	AF158185	polymerase (DNA directed), eta
222923_s_at	318.435	364.953	0.872537	0.0304607	0.046	319.237	366.22	1.14717	0.0704292	#	KCNE3	AF302494	potassium voltage-gated channel, Isk-related family, member 3
222928_s_at	795.682	643.929	1.23567	0.00895246	0.052	800.13	621.771	0.777087	0.000221234		FLJ11125	BE675390	hypothetical protein FLJ11125
222973_at	457.763	419.93	1.09009	0.038402	0.051	446.621	416.864	0.933374	0.111998	#	---	AF090884	---
222996_s_at	1242.43	1682.84	0.73829	0.0149319	0	1688.28	2086.78	1.23604	0.0374919		CXXC5	BC002490	CXXC finger 5
223002_s_at	365.453	396.103	0.922623	0.0258831	0.049	373.042	384.484	1.03067	0.569457	#	XRN2	AL136841	5'-3' exoribonuclease 2
223021_x_at	404.78	450.964	0.897589	0.0194864	0.047	397.596	444.056	1.11685	0.0296173		C6orf55	BF241590	chromosome 6 open reading frame 55
223085_at	371.869	409.48	0.908151	0.0193013	0.03	389.185	437.571	1.12433	0.0325835		RNF19	AB029316	ring finger protein 19
223150_s_at	408.19	462.735	0.882125	0.0447205	0.031	439.935	453.29	1.03036	0.569494	#	PTPN23	AF290614	protein tyrosine phosphatase, non-receptor type 23
223155_at	351.511	404.987	0.867958	0.0398675	0.056	342.697	427.853	1.24849	0.00437149		HDHD2	AL136681	haloacid dehalogenase-like hydrolase domain containing 2
223160_s_at	458.539	495.815	0.92482	0.013206	0.052	481.82	492.851	1.0229	0.477693	#	KIAA2010	AK024297	KIAA2010
223173_at	450.348	385.647	1.16777	0.00285469	0	404.533	373.159	0.922444	0.0543528	#	SPINL	AF212371	spinster-like
223180_s_at	1178.98	1399.52	0.842421	0.0162885	0.034	1165.47	1410.46	1.21021	0.0344362		---	BC000892	---
223195_s_at	454.721	552.151	0.823545	0.0181716	0.062	454.212	520.689	1.14636	0.0643889	#	SESN2	BF131886	sestrin 2
223242_s_at	597.207	903.868	0.660724	0.0165498	0	637.084	887.651	1.3933	0.0293403		ET	AF015186	hypothetical protein ET
223250_at	588.593	660.626	0.890962	0.00882685	0.11	589.692	675.051	1.14475	0.000327476		KLHL7	AL136597	kelch-like 7 (Drosophila)
223259_at	642.57	614.033	1.04647	0.0403926	0.012	633.433	619.267	0.977635	0.445968	#	ORMDL3	BC000638	ORM1-like 3 (S. cerevisiae)
223262_s_at	699.919	610.656	1.14618	0.0129734	0.027	661.647	603.408	0.911978	0.0214437		FGFR1OP2	AI738434	FGFR1 oncogene partner 2
223285_s_at	362.195	334.52	1.08273	0.0322262	0.038	363.032	337.699	0.930218	0.106135	#	SIAT7D	AW044319	sialyltransferase 7D ((alpha-N-acetylneuraminyl-2,3-beta-galactosyl-1,3)-N-acetyl galactosaminide alpha-2,6-sialyltransferase)
223310_x_at	533.204	596.673	0.893629	0.0104423	0.063	558.029	604.746	1.08372	0.37603	#	IPLA2(GAMMA)	AF217519	intracellular membrane-associated calcium-independent phospholipase A2 gamma
223376_s_at	1351.68	1518.68	0.890032	0.0385362	0.027	1474.77	1522.62	1.03244	0.797295	#	BRI3	AB055977	brain protein I3
223380_s_at	495.493	546.282	0.907029	0.0434136	0.001	500.626	594.755	1.18802	0.00346082		LATS2	AF207547	LATS, large tumor suppressor, homolog 2 (Drosophila)
223395_at	406.427	629.199	0.645944	0.0233035	0.033	449.691	616.148	1.37016	0.0624961	#	TARSH	AB056106	target of Nesh-SH3
223404_s_at	475.228	574.62	0.82703	0.031016	0.029	447.924	582.743	1.30099	0.00217103		C1orf25	AW512122	chromosome 1 open reading frame 25
223437_at	718.748	926.299	0.775935	0.00309232	0.062	698.829	893.154	1.27807	0.0055495		PPARA	N48315	peroxisome proliferative activated receptor, alpha
223482_at	582.804	682.024	0.854522	0.0266433	0.047	575.4	700.638	1.21765	0.0567786	#	TMPIT	AF327923	transmembrane protein induced by tumor necrosis factor alpha
223507_at	722.73	801.984	0.901178	0.00241288	0.053	717.63	788.527	1.09879	0.00588111		CLPX	AL136922	ClpX caseinolytic protease X homolog (E. coli)
223516_s_at	1186.08	1305.37	0.908616	0.00988908	0.062	1216.42	1308.22	1.07547	0.20171	#	C6orf49	AF216754	chromosome 6 open reading frame 49
223525_at	712.969	656.924	1.08531	0.0463028	0.08	710.446	610.748	0.859668	0.00237126		DLL4	AB036931	delta-like 4 (Drosophila)
223528_s_at	507.524	918.036	0.552836	0.00922821	0	577.212	919.028	1.59219	0.0275355		FLJ20859	AF321002	FLJ20859 gene
223531_x_at	387.922	420.474	0.922583	0.047859	0.028	374.397	401.743	1.07304	0.0905768	#	GPR89	AF151035	G protein-coupled receptor 89
223560_s_at	405.795	436.125	0.930455	0.0120628	0	410.557	431.63	1.05133	0.086283	#	PRO1853	BC004548	hypothetical protein PRO1853
223603_at	470.648	435.288	1.08123	0.00712686	0.043	467.922	428.345	0.915419	0.00657122		ZNF179	AB026054	zinc finger protein 179
223617_x_at	635.528	593.177	1.0714	0.0392496	0.029	623.35	585.661	0.939539	0.0294818		ATAD3B	BC002542	ATPase family, AAA domain containing 3B
223693_s_at	339.989	322.462	1.05435	0.0336296	0.106	333.279	313.804	0.941566	0.0387796		FLJ10324	AL136731	hypothetical protein FLJ10324
223712_at	474.209	519.015	0.913672	0.0503428	0	467.489	506.038	1.08246	0.16983	#	DCOHM	AL136721	dimerization cofactor of hepatocyte nuclear factor 1 ( HNF1) from muscle
223738_s_at	530.686	481.784	1.1015	0.0155368	0.002	513.392	462.357	0.900593	0.0151434		PGM2	AL136705	phosphoglucomutase 2
223741_s_at	357.712	405.385	0.8824	0.0124995	0.053	385.359	401.439	1.04173	0.195561	#	TTYH2	BC004233	tweety homolog 2 (Drosophila)
223804_s_at	385.238	412.538	0.933824	0.04103	0	392.242	415.422	1.0591	0.0867117	#	THUMPD3	BC001622	THUMP domain containing 3
223845_at	332.894	357.463	0.931266	0.0450432	0.028	341.055	340.618	0.998719	0.970076	#	LOC144305	BC001437	hypothetical protein BC001437
223851_s_at	351.706	300.607	1.16999	0.0162267	0	353.038	299.562	0.848528	0.0204975		TNFRSF18	AF241229	tumor necrosis factor receptor superfamily, member 18
223909_s_at	469.289	421.695	1.11286	0.000501237	0.046	466.47	424.275	0.909544	0.0601984	#	HDAC8	AF212246	histone deacetylase 8
223911_at	330.384	308.047	1.07251	0.0232356	0	328.788	304.307	0.92554	0.0394838		MGC2664	BC004968	hypothetical protein MGC2664
223943_s_at	432.47	376.861	1.14756	0.0122854	0	408.854	372.401	0.910839	0.00803456		---	AF130106	---
223982_s_at	467.588	510.242	0.916403	0.0132983	0.061	492.025	512.577	1.04177	0.658071	#	IPLA2(GAMMA)	AB041261	intracellular membrane-associated calcium-independent phospholipase A2 gamma
223996_s_at	878.549	1146.49	0.766293	0.0249311	0.052	881.207	1025.44	1.16367	0.104459	#	MRPL30	AF151083	mitochondrial ribosomal protein L30
224020_at	438.312	390.069	1.12368	0.0466067	0.05	427.321	394.571	0.923359	0.0553928	#	MGC4473	BC001841	hypothetical protein MGC4473
224133_at	550.748	807.969	0.681645	0.0498658	0.039	602.267	804.585	1.33593	0.0887869	#	MGC10955	BC004960	hypothetical protein MGC10955
224173_s_at	320.523	373.373	0.858453	0.0091009	0.053	334.716	362.327	1.08249	0.111662	#	MRPL30	BC000217	mitochondrial ribosomal protein L30
224250_s_at	480.313	536.925	0.894562	0.0304822	0.037	479.649	528.15	1.10112	0.231974	#	SECISBP2	BC001189	SECIS binding protein 2
224264_x_at	349.939	519.863	0.673137	0.0456773	0.003	383.504	491.856	1.28253	0.141773	#	ZAN	AF332975	zonadhesin
224265_s_at	353.244	308.701	1.14429	0.00104866	0.059	336.39	299.597	0.890625	0.00420432		ZAN	AF332980	zonadhesin
224267_x_at	333.98	307.373	1.08656	0.00692535	0.045	322.14	302.74	0.939777	0.154795	#	ZAN	AF332978	zonadhesin
224333_s_at	621.654	682.745	0.910521	0.0250451	0.186	631.993	692.729	1.0961	0.00237838		MRPS5	AB049940	mitochondrial ribosomal protein S5 /// mitochondrial ribosomal protein S5
224375_at	864.727	600.605	1.43976	0.00323539	0.077	798.327	610.616	0.76487	0.00490601		---	AF271776	---
224377_s_at	829.538	876.815	0.946081	0.0417471	0.04	853.69	904.784	1.05985	0.0657296	#	RAB18	AF274957	RAB18, member RAS oncogene family /// RAB18, member RAS oncogene family
224378_x_at	1170.62	1047.01	1.11806	0.00232534	0.092	1081.36	987.904	0.913575	0.127806	#	MAP1LC3A	AF276658	microtubule-associated protein 1 light chain 3 alpha /// microtubule-associated protein 1 light chain 3 alpha
224418_x_at	400.796	374.195	1.07109	0.0231467	0.024	414.964	364.346	0.878018	0.00854229		PMCHL1	AY008407	pro-melanin-concentrating hormone-like 1 /// pro-melanin-concentrating hormone-like 1
224419_x_at	400.83	371.472	1.07903	0.0127653	0.03	410.585	368.812	0.898259	0.0111442		PMCHL1	AY008409	pro-melanin-concentrating hormone-like 1 /// pro-melanin-concentrating hormone-like 1
224422_x_at	348.517	310.912	1.12095	0.0373076	0.067	349.17	313.793	0.898682	0.0586057	#	PMCHL2	AY008412	pro-melanin-concentrating hormone-like 2 /// pro-melanin-concentrating hormone-like 2
224432_at	627.441	569.273	1.10218	0.0170581	0.037	619.109	572.083	0.924042	0.0156221		SH3GLB2	BC005843	SH3-domain GRB2-like endophilin B2 /// SH3-domain GRB2-like endophilin B2
224462_s_at	389.776	341.845	1.14021	0.0430563	0.045	389.39	335.545	0.861718	0.0147095		CHCHD6	BC006123	coiled-coil-helix-coiled-coil-helix domain containing 6 /// coiled-coil-helix-coiled-coil-helix domain containing 6
224497_x_at	412.597	380.644	1.08395	0.036866	0.03	401.969	370.036	0.92056	0.0792538	#	DHRS10	BC006294	dehydrogenase/reductase (SDR family) member 10 /// dehydrogenase/reductase (SDR family) member 10
224516_s_at	1901.35	2413.05	0.787946	0.0309363	0.064	2526.15	2948.12	1.16704	0.097438	#	CXXC5	BC006428	CXXC finger 5 /// CXXC finger 5
224525_s_at	359.814	451.153	0.797544	0.0341105	0	355.555	426.663	1.19999	0.0275043		PTD004	AL136546	hypothetical protein PTD004 /// hypothetical protein PTD004
224562_at	706.217	865.684	0.81579	0.0435777	0	731.552	847.505	1.1585	0.133602	#	WASF2	AK025566	WAS protein family, member 2
224572_s_at	950.582	860.285	1.10496	0.0217713	0.05	830.109	894.635	1.07773	0.235963	#	IRF2BP2	BG485163	interferon regulatory factor 2 binding protein 2
224605_at	826.835	1038.05	0.796528	0.0425854	0.024	858.173	1100.32	1.28217	0.0622991	#	LOC401152	AV727336	HCV F-transactivated protein 1
224613_s_at	446.158	401.769	1.11048	0.00814061	0.028	418.124	392.569	0.938883	0.0340527		DNAJC5	BF115518	DnaJ (Hsp40) homolog, subfamily C, member 5
224648_at	290.843	350.347	0.830157	0.00556452	0.017	303.742	369.998	1.21813	0.00275414		DKFZp761C169	AI860946	vasculin
224661_at	423.965	464.483	0.912767	0.0126548	0.031	439.917	456.259	1.03715	0.241125	#	MGC14156	AW028485	hypothetical protein MGC14156
224714_at	319.666	421.257	0.758839	0.00387799	0.029	360.841	425.381	1.17886	0.205257	#	MKI67IP	AL542544	MKI67 (FHA domain) interacting nucleolar phosphoprotein
224737_x_at	308.715	349.202	0.88406	0.0260825	0	291.617	326.469	1.11951	0.0174339		CCAR1	BG541830	cell division cycle and apoptosis regulator 1
224744_at	974.259	811.478	1.2006	0.0348355	0.034	925.826	823.758	0.889755	0.00942599		FLJ20421	AW628838	hypothetical protein FLJ20421
224760_at	476.91	564.796	0.844393	0.0298403	0.012	480.903	542.049	1.12715	0.0338829		SP1	AI795991	Sp1 transcription factor
224767_at	764.837	673.603	1.13544	0.000577287	0.02	753.912	683.376	0.90644	0.0274751		RPL37	AL044126	Ribosomal protein L37
224778_s_at	634.202	714.935	0.887077	0.00787138	0.063	626.156	751.786	1.20064	1.10453e-05		---	AK025902	CDNA clone IMAGE:5263531, partial cds
224788_at	353.553	399.726	0.88449	0.00266896	0.051	394.697	440.637	1.11639	0.0153834		ARF6	AV700721	ADP-ribosylation factor 6
224809_x_at	513.501	549.322	0.93479	0.0082786	0.043	552.887	537.79	0.972695	0.660257	#	---	AK023166	---
224845_s_at	814.038	900.98	0.903503	0.0291773	0.07	843.211	895.373	1.06186	0.0792639	#	KIAA1458	AU159395	KIAA1458 protein
224849_at	301.577	348.409	0.865583	0.00221336	0.043	310.135	338.345	1.09096	0.0549751	#	TTC17	AK023161	Tetratricopeptide repeat domain 17
224864_at	1204.79	1043.8	1.15423	0.0437709	0.041	1176.53	1037.68	0.881984	0.00232192		SRA1	BG397813	steroid receptor RNA activator 1
224866_at	281.024	328.915	0.854398	0.00613651	0.074	278.893	341.705	1.22522	0.00208069		MLSTD2	AK024967	male sterility domain containing 2
224909_s_at	334.252	282.172	1.18457	0.00290253	0.033	325.234	281.649	0.865988	0.020073		PREX1	BF308645	phosphatidylinositol 3,4,5-trisphosphate-dependent RAC exchanger 1
224938_at	307.239	364.203	0.843592	0.0052956	0.01	336.874	419.925	1.24653	0.000222242		182-FIP	AW007746	82-kD FMRP Interacting Protein
224939_at	486.28	583.221	0.833783	0.000524033	0.057	533.943	635.549	1.19029	0.000239012		182-FIP	AU144387	82-kD FMRP Interacting Protein
224951_at	854.559	640.344	1.33453	0.0106835	0.034	780.256	648.423	0.831038	0.0438881		LASS5	BE348305	LAG1 longevity assurance homolog 5 (S. cerevisiae)
224960_at	362.699	405.653	0.894112	0.0365509	0.074	364.757	424.426	1.16358	0.00368572		FLJ10074	AK024274	hypothetical protein FLJ10074
224961_at	422.582	551.101	0.766796	0.0447245	0.067	473.708	557.198	1.17625	0.0697109	#	FLJ10074	AB037781	hypothetical protein FLJ10074
224962_at	508.122	565.361	0.898756	0.0322352	0.036	540.216	545.12	1.00908	0.734632	#	LOC90120	AU153030	hypothetical gene supported by AK023162
225004_at	448.572	408.243	1.09879	0.0341582	0.116	445.005	398.146	0.8947	0.0200685		MGC4251	AL525613	hypothetical protein MGC4251
225012_at	757.98	847.689	0.894172	0.0139452	0.037	763.666	832.055	1.08955	0.0274765		HDLBP	BE378479	High density lipoprotein binding protein (vigilin)
225033_at	549.027	695.288	0.789639	0.0162659	0	584.765	634.608	1.08524	0.37698	#	LOC286167	AV721528	hypothetical protein LOC286167
225068_at	303.648	328.404	0.924617	0.0164067	0.03	312.286	340.967	1.09184	0.137844	#	KLHL12	AK024412	kelch-like 12 (Drosophila)
225120_at	530.113	613.078	0.864674	0.0307067	0.069	538.817	627.25	1.16412	0.0398695		PURB	N25931	purine-rich element binding protein B
225135_at	357.309	430.421	0.830138	0.0395464	0.078	379.026	396.213	1.04535	0.429531	#	SIN3A	AI433017	SIN3 homolog A, transcriptional regulator (yeast)
225139_at	636.467	974.663	0.653013	0.0267596	0.034	701.523	983.339	1.40172	0.0399351		NFATC3	AW070424	nuclear factor of activated T-cells, cytoplasmic, calcineurin-dependent 3
225144_at	533.588	611.524	0.872554	0.00556598	0.067	550.679	620.43	1.12666	0.0108916		BMPR2	AI457436	bone morphogenetic protein receptor, type II (serine/threonine kinase)
225170_at	383.049	404.267	0.947515	0.0458858	0.005	416.264	404.938	0.972791	0.663013	#	WDR5	BE740137	WD repeat domain 5
225203_at	444.156	655.152	0.677944	0.000585985	0	485.189	618.826	1.27543	0.00669592		PPP1R16A	AI742931	protein phosphatase 1, regulatory (inhibitor) subunit 16A
225207_at	3677.26	293.276	12.5386	0.0135493	0.025	639.664	253.417	0.396172	0.377034	#	PDK4	AV707102	pyruvate dehydrogenase kinase, isoenzyme 4
225219_at	496.019	564.656	0.878444	0.0383911	0.034	489.17	581.771	1.1893	0.00454922		SMAD5	BF526175	SMAD, mothers against DPP homolog 5 (Drosophila)
225220_at	592.865	900.61	0.658292	0.0486795	0.027	546.94	927.346	1.69552	0.0239388		---	BF340290	CDNA clone IMAGE:4184613, partial cds
225254_at	721.112	1028.11	0.701394	0.0254709	0	772.465	964.182	1.24819	0.107125	#	MGC20255	AI391459	hypothetical protein MGC20255
225291_at	405.983	460.302	0.881993	0.0178514	0.002	417.095	444.675	1.06612	0.221573	#	PNPT1	AI967971	polyribonucleotide nucleotidyltransferase 1
225316_at	393.978	368.271	1.0698	0.0444972	0.032	392.34	368.399	0.93898	0.206654	#	FLJ14490	AL572488	hypothetical protein FLJ14490
225330_at	378.601	707.164	0.535379	0.00819015	0	426.808	701.713	1.6441	0.0163337		MGC18216	AL044092	hypothetical protein MGC18216
225340_s_at	615.269	683.651	0.899975	0.0403164	0	663.067	751.02	1.13265	0.0414663		---	BG107845	---
225417_at	574.714	635.855	0.903844	0.0478706	0.055	570.8	635.174	1.11278	0.0639986	#	EPC1	AA766646	enhancer of polycomb homolog 1 (Drosophila)
225434_at	560.832	512.641	1.094	0.0372622	0.049	535.412	481.46	0.899233	0.0249412		DEDD2	AW245401	death effector domain containing 2
225460_at	294.783	340.846	0.864857	0.0361793	0.035	299.522	339.042	1.13194	0.0641574	#	SEC22L3	BG432489	SEC22 vesicle trafficking protein-like 3 (S. cerevisiae)
225477_s_at	308.737	354.698	0.870423	0.0267766	0.026	301.288	372.444	1.23617	0.0158131		MRPS25	AL138444	Mitochondrial ribosomal protein S25
225480_at	830.568	699.471	1.18742	0.0330693	0.035	768.978	694.458	0.903093	0.181375	#	FLJ45459	BE408081	FLJ45459 protein
225488_at	377.252	350.548	1.07618	0.0389609	0.03	356.772	337.842	0.94694	0.185167	#	DERL1	AI967978	Der1-like domain family, member 1
225528_at	539.992	598.008	0.902985	0.0436144	0.062	546.803	616.3	1.1271	0.0021756		IPO8	AU149465	importin 8
225530_at	305.028	341.433	0.893375	0.038308	0.004	326.317	326.873	1.0017	0.953861	#	MOBKL2A	BE396735	MOB1, Mps One Binder kinase activator-like 2A (yeast)
225544_at	564.873	531.208	1.06337	0.0356552	0.065	557.33	536.791	0.963147	0.336729	#	TBX3	AI806338	T-box 3 (ulnar mammary syndrome)
225558_at	399.161	437.001	0.913409	0.0261866	0.016	407.132	463.489	1.13842	0.00573182		GIT2	R38084	G protein-coupled receptor kinase interactor 2
225563_at	541.729	473.598	1.14386	0.0384826	0.036	514.808	471.057	0.915014	0.0135909		PAN3	AI970788	PABP1-dependent poly A-specific ribonuclease subunit PAN3
225569_at	435.013	482.445	0.901684	0.0225645	0.036	476.98	526.096	1.10297	0.171248	#	EIF2C2	AI813489	Eukaryotic translation initiation factor 2C, 2
225570_at	805.501	1000.7	0.804936	0.0318798	0.034	881.599	1123.59	1.2745	0.0318272		SLC41A1	AW439816	solute carrier family 41, member 1
225584_at	707.979	609.97	1.16068	0.026491	0.085	672.219	625.161	0.929996	0.486147	#	---	BE880820	CDNA clone IMAGE:5265581, partial cds
225625_at	342.932	312.933	1.09586	0.00718142	0.042	334.994	310.274	0.926209	0.0514408	#	MGC90512	AI865555	similar to hypothetical protein 9530023G02
225629_s_at	602.644	701.505	0.859073	0.0293793	0.054	663.365	790.904	1.19226	0.00181668		ZBTB4	AI669498	zinc finger and BTB domain containing 4
225646_at	397.783	362.868	1.09622	0.0336158	0.048	394.853	352.079	0.89167	0.00165583		CTSC	AI246687	cathepsin C
225676_s_at	288.269	313.683	0.918981	0.0395471	0.039	317.826	316.025	0.994332	0.972064	#	DKFZP564O0463	BE409290	DKFZP564O0463 protein
225685_at	343.295	430.731	0.797004	0.0363343	0.058	367.768	641.899	1.74539	0.116769	#	CDC42EP3	AI801777	CDC42 effector protein (Rho GTPase binding) 3
225698_at	518.507	409.114	1.26739	0.00150446	0.02	459.236	399.669	0.870291	0.0129062		TIGA1	BF314746	TIGA1
225699_at	367.821	340.284	1.08092	0.0439136	0.058	371.206	337.726	0.909808	0.0105677		LOC285958	AI937446	hypothetical protein LOC285958
225773_at	371.003	417.032	0.889626	7.13935e-05	0.043	364.93	405.33	1.11071	0.000464795		KIAA1972	AI669186	KIAA1972 protein
225790_at	648.437	894.413	0.724986	0.0332613	0.015	706.653	906.689	1.28308	0.0592179	#	LOC253827	AL048386	hypothetical protein LOC253827
225801_at	667.089	472.973	1.41042	0.00444748	0.029	443.99	360.755	0.812529	0.0443347		FBXO32	AW518714	F-box protein 32
225803_at	4614.97	3597.66	1.28277	0.00966883	0.059	3179.95	2755.28	0.866454	0.10265	#	FBXO32	AW006123	F-box protein 32
225812_at	411.947	384.459	1.0715	0.0194029	0.05	389.819	365.733	0.938214	0.104876	#	---	N36759	Transcribed locus, moderately similar to NP_899077.1 RIKEN cDNA 1700025K23 gene [Mus musculus]
225814_at	611.812	1012.55	0.604228	0.013627	0.016	660.132	1052.71	1.5947	0.0148437		XRN1	BG534738	5'-3' exoribonuclease 1
225850_at	345.456	392.132	0.880968	0.00988551	0	375.209	393.184	1.04791	0.546045	#	C6orf83	BF975327	chromosome 6 open reading frame 83
225907_at	534.31	476.951	1.12026	0.0334071	0.057	549.652	489.035	0.889717	0.00738092		LOC155036	AA679045	hypothetical protein LOC155036
225920_at	990.272	910.012	1.0882	0.024139	0.053	969.101	884.351	0.912548	0.00296406		LOC148413	AW452640	hypothetical protein LOC148413
225928_at	428.835	469.508	0.91337	0.0484063	0.017	450.629	491.125	1.08987	0.15918	#	---	AI984620	---
225940_at	796.978	893.929	0.891545	0.0343252	0.036	812.158	865.991	1.06628	0.142766	#	EIF4E3	BE465037	eukaryotic translation initiation factor 4E member 3
225994_at	350.723	388.055	0.903799	0.0214384	0.058	358.239	404.035	1.12784	0.0255466		CPSF2	AK023583	cleavage and polyadenylation specific factor 2, 100kDa
226010_at	788.989	879.615	0.89697	0.0222443	0.047	752.817	850.151	1.12929	0.0194352		SLC25A23	BG290819	solute carrier family 25 (mitochondrial carrier; phosphate carrier), member 23
226011_at	675.859	619.969	1.09015	0.0285773	0.038	642.043	603.488	0.93995	0.115436	#	MGC23918	BG107767	hypothetical protein MGC23918
226015_at	302.452	333.054	0.908117	0.028002	0.036	285.273	323.129	1.1327	0.0103819		ZNF12	AI865669	zinc finger protein 12 (KOX 3)
226019_at	379.34	459.091	0.826284	0.00233179	0.059	364.278	440.352	1.20883	0.0600663	#	MPRP-1	AI927931	metalloprotease related protein 1
226055_at	963.264	854.6	1.12715	0.0300086	0.059	760.524	745.399	0.980112	0.736757	#	ARRDC2	AK000689	arrestin domain containing 2
226072_at	514.425	458.461	1.12207	0.0451856	0.019	489.268	447.228	0.914076	0.0769244	#	FUK	AW080798	fucokinase
226077_at	286.398	357.06	0.8021	0.0264021	0.04	318.277	396.509	1.2458	0.00506361		FLJ31951	AL553942	hypothetical protein FLJ31951
226087_at	276.731	391.781	0.70634	0.048794	0.088	285.627	390.913	1.36861	0.0694362	#	LZIC	BG180887	leucine zipper and CTNNBIP1 domain containing
226130_at	422.617	383.578	1.10178	0.00902349	0.009	408.189	380.43	0.931996	0.098973	#	RPS16	AA583817	ribosomal protein S16
226151_x_at	368.827	407.001	0.906207	0.00375712	0.054	347.912	399.488	1.14824	5.97059e-05		CRYZL1	AK001293	crystallin, zeta (quinone reductase)-like 1
226154_at	650.061	766.491	0.848099	0.0218692	0.026	657.739	773.028	1.17528	0.0269759		DNM1L	AL043631	CDNA FLJ33469 fis, clone BRAMY2002005 /// Dynamin 1-like
226170_at	300.257	340.449	0.881944	0.00611607	0.078	308.489	343.921	1.11486	0.022201		---	AA151838	---
226178_at	276.016	324.767	0.84989	0.0426027	0.071	289.746	299.925	1.03513	0.56819	#	SOCS4	BF446961	suppressor of cytokine signaling 4
226183_at	302.39	340.206	0.888845	0.00439193	0.086	320.251	364.17	1.13714	0.000673249		GSK3B	AW139538	Glycogen synthase kinase 3 beta
226255_at	286.479	327.52	0.874691	0.00572852	0.064	281.919	329.516	1.16883	0.00141797		ZBTB33	BE302089	zinc finger and BTB domain containing 33
226260_x_at	444.771	412.193	1.07904	0.0469461	0.019	443.776	405.6	0.913975	0.0940354	#	ZNF358	BF026472	zinc finger protein 358
226264_at	325.771	296.969	1.09699	0.0211045	0.043	311.425	291.485	0.935971	0.0233148		SUSD1	AL137432	sushi domain containing 1
226265_at	336.215	396.128	0.848752	0.0261977	0.02	329.275	423.894	1.28736	0.000669762		FLJ21924	AW294894	Hypothetical protein FLJ21924
226291_at	403.976	435.069	0.928533	0.0464434	0	393.791	426.65	1.08344	0.105427	#	ALS2	AB046783	amyotrophic lateral sclerosis 2 (juvenile)
226322_at	541.778	671.413	0.806921	0.00317193	0.044	537.304	681.491	1.26835	0.000215862		ARG99	BF109231	ARG99 protein
226326_at	450.015	621.798	0.723732	0.0051459	0.026	464.31	651.996	1.40422	0.000463621		RNF159	AI798098	ring finger protein (C3HC4 type) 159
226338_at	298.957	487.763	0.612914	0.00214948	0.017	368.46	505.149	1.37097	0.0503595	#	DKFZp762O076	AA604382	hypothetical protein DKFZp762O076
226339_at	300.373	349.298	0.859931	0.0269512	0.035	306.027	367.63	1.2013	0.00898219		TRUB1	AW500239	TruB pseudouridine (psi) synthase homolog 1 (E. coli)
226348_at	292.89	327.133	0.895325	0.0275399	0.081	317.128	326.075	1.02821	0.470031	#	---	AK026764	---
226406_at	510.772	584.003	0.874605	0.00304407	0.044	530.373	620.772	1.17044	0.0049093		C18orf25	AI823360	chromosome 18 open reading frame 25
226481_at	414.956	446.35	0.929665	0.0410673	0.021	425.421	438.965	1.03184	0.579695	#	VprBP	W74375	Vpr-binding protein
226501_at	371.4	426.679	0.870443	0.0432629	0.056	347.692	429.497	1.23528	0.00419499		LOC63929	BE966628	hypothetical protein LOC63929
226528_at	287.482	317.01	0.906854	0.0125816	0.077	297.013	352.3	1.18614	0.0395758		MTX3	AI743044	metaxin 3
226547_at	533.204	597.78	0.891973	0.0361747	0.058	548.231	608.609	1.11013	0.0945965	#	MYST3	AI817830	MYST histone acetyltransferase (monocytic leukemia) 3
226548_at	567.035	754.126	0.75191	4.65428e-05	0.081	719.384	887.426	1.23359	0.0199183		---	AI935915	---
226549_at	595.245	683.458	0.870932	0.0168186	0	652.928	732.99	1.12262	0.0524975	#	---	BF447901	---
226579_at	314.654	344.476	0.913429	0.0343159	0.015	343.109	334.351	0.974472	0.673039	#	---	AA706790	---
226620_x_at	405.104	465.022	0.87115	0.0113893	0.049	436.6	470.261	1.0771	0.328275	#	DAZAP1	AI951998	DAZ associated protein 1
226623_at	365.701	330.815	1.10546	0.0259542	0.029	352.144	326.746	0.927875	0.0390808		PHYHIPL	AI829726	phytanoyl-CoA hydroxylase interacting protein-like
226689_at	353.95	500.68	0.706939	0.0262528	0.047	377.219	489.926	1.29879	0.056517	#	---	AI749451	Transcribed locus, highly similar to NP_080178.1 RIKEN cDNA 1500009M05 gene [Mus musculus]
226692_at	453.582	660.504	0.686721	0.0349147	0.03	478.64	641.087	1.33939	0.0726222	#	SERF2	AI092931	Small EDRK-rich factor 2
226721_at	329.309	368.561	0.893501	0.0178103	0.065	322.32	365.252	1.1332	0.0297312		LOC286148	AW517711	Hypothetical protein LOC286148
226728_at	446.964	488.527	0.914921	0.0152997	0.062	449.859	460.212	1.02302	0.61544	#	SLC27A1	BF056007	solute carrier family 27 (fatty acid transporter), member 1
226739_at	415.438	591.245	0.702648	0.0269394	0.033	427.769	571.015	1.33487	0.0475691		KIAA1991	AA536004	Hypothetical protein KIAA1991
226773_at	377.912	628.071	0.601703	0.000694963	0	379.649	616.124	1.62288	0.000208613		---	AW290940	Transcribed locus, weakly similar to NP_055301.1 neuronal thread protein AD7c-NTP [Homo sapiens]
226823_at	511.735	547.481	0.934707	0.0289393	0.02	550.74	550.282	0.999169	0.987143	#	PHACTR4	AW450293	phosphatase and actin regulator 4
226831_at	896.72	1040.91	0.861473	0.00609872	0.036	876.084	1017.91	1.16188	0.0390008		---	AA928542	---
226838_at	378.095	336.344	1.12413	0.0398946	0.018	358.415	328.128	0.915499	0.202091	#	---	BE465877	Similar to CG14894-PA
226931_at	609.843	726.007	0.839995	0.0468198	0.057	590.185	695.251	1.17802	0.0115773		ARG99	AU151239	ARG99 protein
226932_at	2244	2617.38	0.857348	0.0233367	0.067	2193.48	2640.65	1.20386	0.0700836	#	---	AW467136	---
226954_at	581.374	648.204	0.896899	0.0173201	0	605.639	662.208	1.0934	0.0251737		---	BE221883	---
226969_at	467.545	524.85	0.890817	0.0322007	0.021	461.014	552.744	1.19897	0.000422347		LOC149448	AV706396	hypothetical protein LOC149448
226977_at	453.934	511.555	0.887361	0.00606836	0.023	467.053	552.779	1.18355	0.00900677		---	N26029	Homo sapiens, clone IMAGE:5275203, mRNA
226978_at	683.364	846.472	0.807309	0.00496108	0.038	660.825	794.009	1.20154	0.0244742		PPARA	AA910945	peroxisome proliferative activated receptor, alpha
226979_at	407.9	468.012	0.871559	0.0171723	0.054	403.803	446.772	1.10641	0.0742228	#	MAP3K2	AI125541	Mitogen-activated protein kinase kinase kinase 2
226981_at	294.014	317.772	0.925235	0.044226	0	287.754	314.579	1.09322	0.0175783		MLL	AW002079	Myeloid/lymphoid or mixed-lineage leukemia (trithorax homolog, Drosophila)
226996_at	509.14	448.555	1.13507	0.00829846	0.038	474.284	448.879	0.946435	0.159337	#	LYCAT	AV717041	lysocardiolipin acyltransferase
227008_at	316.487	341.513	0.92672	0.0421821	0.018	317.401	336.072	1.05882	0.247752	#	MGC45386	AI393309	Similar to RIKEN cDNA 1110033O09 gene
227013_at	539.226	616.989	0.873963	0.0124964	0.033	553.461	680.948	1.23035	0.000971911		---	AI535735	---
227040_at	284.709	349.128	0.815485	0.0270631	0.021	293.089	349.982	1.19411	0.0620098	#	---	AI655763	Similar to RIKEN cDNA 8030451K01
227075_at	505.843	549.657	0.920289	0.0381194	0.067	489.989	538.834	1.09969	0.0306764		ELP3	AI949204	elongation protein 3 homolog (S. cerevisiae)
227076_at	377.895	340.265	1.11059	0.0241337	0.032	367.085	339.738	0.925502	0.00252954		---	AI719545	---
227085_at	398.96	436.914	0.913133	0.0109555	0.06	395.07	447.483	1.13267	0.00189152		H2AFV	AI823792	H2A histone family, member V
227106_at	563.556	517.502	1.08899	0.017996	0.016	525.816	507.539	0.965242	0.238865	#	---	AW139191	Similar to RIKEN cDNA 1110012D08
227113_at	1118.1	1285.86	0.869533	0.00626471	0.02	1120.49	1290.17	1.15143	0.0805508	#	ADHFE1	BE048349	alcohol dehydrogenase, iron containing, 1
227119_at	503.9	589.162	0.855282	0.0423771	0.038	487.017	569.718	1.16981	0.00720617		CNOT6L	BF103856	CCR4-NOT transcription complex, subunit 6-like
227127_at	349.365	320.324	1.09066	0.0078658	0.067	340.961	307.168	0.900887	0.0166647		---	BF222855	---
227135_at	430.192	365.121	1.17822	0.0136474	0.033	433.697	344.258	0.793775	5.89932e-05		ASAHL	AI436803	N-acylsphingosine amidohydrolase (acid ceramidase)-like
227151_at	435.84	410.812	1.06092	0.0121795	0.049	437.858	406.917	0.929335	0.00389703		MGC32065	BE464841	hypothetical protein MGC32065
227219_x_at	1142.48	1012.3	1.1286	0.00199268	0.051	1056.88	976.904	0.924325	0.185898	#	MAP1LC3A	BE857601	microtubule-associated protein 1 light chain 3 alpha
227245_at	454.337	500.031	0.908619	0.0361904	0.063	461.366	507.329	1.09962	0.075324	#	FLJ13089	AW511198	hypothetical protein FLJ13089
227299_at	321.896	279.436	1.15195	0.0375963	0.026	310.782	283.457	0.912076	0.0762631	#	---	AA020986	---
227307_at	395.161	454.033	0.870336	0.0366272	0.075	393.508	430.498	1.094	0.0888025	#	LOC90139	AL565381	Tetraspanin similiar to uroplakin 1
227328_at	312.328	293.899	1.06271	0.0231586	0	302.09	286.415	0.94811	0.0569183	#	CAMTA1	AA724147	Calmodulin binding transcription activator 1
227332_at	314.536	291.337	1.07963	0.0418421	0.003	303.326	286.649	0.94502	0.109312	#	---	BF511170	---
227380_x_at	622.991	534.312	1.16597	0.000383269	0.042	606.545	542.19	0.8939	0.00905942		---	BF339831	---
227381_at	419.221	375.983	1.115	0.00731521	0.014	418.827	375.898	0.897503	0.00305278		---	AI400646	---
227400_at	3121.98	3470.84	0.899488	0.0233475	0.043	3278.44	3535.72	1.07848	0.163079	#	NFIX	AI355848	nuclear factor I/X (CCAAT-binding transcription factor)
227417_at	341.192	385.97	0.883986	0.00929766	0.052	332.192	395.142	1.1895	0.0765262	#	FLJ20605	AW057543	hypothetical protein FLJ20605
227456_s_at	577.166	680.256	0.848454	0.0123286	0.145	609.042	644.279	1.05786	0.372167	#	C6orf136	BF224092	chromosome 6 open reading frame 136
227498_at	576.767	689.544	0.836447	0.00319496	0.081	574.044	715.324	1.24611	0.000439693		---	AI480314	CDNA FLJ11723 fis, clone HEMBA1005314
227510_x_at	339.701	435.751	0.779575	0.0441009	0.058	356.845	478.319	1.34041	0.307925	#	---	AL037917	---
227511_at	410.924	467.428	0.879118	0.0383515	0.081	427.33	464.723	1.0875	0.142015	#	PD2	BE963280	Hypothetical protein F23149_1
227521_at	324.617	288.44	1.12542	0.00607051	0.012	320.094	295.077	0.921844	0.0261252		FBXO33	N22902	F-box protein 33
227527_at	534.741	591.22	0.904469	0.0400946	0	549.328	583.506	1.06222	0.103004	#	MLL2	AI394529	Myeloid/lymphoid or mixed-lineage leukemia 2
227531_at	583.201	653.592	0.8923	0.00142882	0.047	593.373	703.777	1.18606	0.00747691		---	AI816849	Homo sapiens, clone IMAGE:5267398, mRNA
227560_at	570.235	500.654	1.13898	0.0156879	0.019	566.666	469.018	0.827679	0.000105081		SFXN2	AL530504	sideroflexin 2
227562_at	293.937	325.865	0.902022	0.0338509	0.051	288.461	314.639	1.09075	0.0912071	#	MAP2K1IP1	AI335267	Mitogen-activated protein kinase kinase 1 interacting protein 1
227569_at	296.699	326.86	0.907726	0.0101211	0.095	308.795	348.608	1.12893	0.00132217		LNX2	AU151331	ligand of numb-protein X 2
227598_at	323.288	294.299	1.0985	0.013447	0.074	318.387	285.35	0.896236	0.00494585		C7orf29	AI762857	chromosome 7 open reading frame 29
227600_at	287.007	332.585	0.862957	0.0219971	0.057	286.839	334.879	1.16748	0.0100874		MRPS30	AW272333	Mitochondrial ribosomal protein S30
227616_at	493.752	623.933	0.791354	0.0272288	0.046	544.964	654.014	1.2001	0.000547219		BCL9L	BG481877	B-cell CLL/lymphoma 9-like
227630_at	503.856	556.791	0.904928	0.011932	0.064	508.863	523.759	1.02927	0.492057	#	PPP2R5E	AW274445	Protein phosphatase 2, regulatory subunit B (B56), epsilon isoform
227657_at	490.8	590.933	0.830552	0.0292358	0.082	457.834	549.883	1.20105	0.170552	#	RNF150	AA722069	ring finger protein 150
227739_at	682.878	618.135	1.10474	0.0128023	0.005	669.046	616.657	0.921696	0.000934867		---	AI417537	Similar to hypothetical protein
227757_at	407.498	577.624	0.705474	0.029364	0.11	451.293	572.29	1.26811	0.0707416	#	CUL4A	AL563297	cullin 4A
227783_at	318.748	293.476	1.08611	0.0409154	0.029	308.869	301.584	0.976412	0.59601	#	---	AA573901	---
227786_at	374.03	341.252	1.09605	0.00191156	0.04	352.185	336.174	0.954538	0.16781	#	THRAP6	AI026938	thyroid hormone receptor associated protein 6
227823_at	365.587	343.416	1.06456	0.0448457	0.067	360.272	340.924	0.946296	0.017855		RGAG4	BE348679	retrotransposon gag domain containing 4
227951_s_at	358.293	332.407	1.07787	0.0162081	0.067	341.541	327.61	0.95921	0.0872224	#	LOC147965	AW338561	hypothetical protein LOC147965
227981_at	565.639	522.331	1.08291	0.0268379	0.051	573.218	526.25	0.918062	0.00128742		CYB561D1	AI741458	cytochrome b-561 domain containing 1
228000_at	379.044	350.076	1.08275	0.0122009	0.003	358.141	351.79	0.982266	0.47639	#	ODC-p	BE676484	ornithine decarboxylase-like
228020_at	388.153	439.38	0.883413	0.0156701	0.052	381.433	428.993	1.12469	0.0145065		FLJ20758	BG055431	FLJ20758 protein
228039_at	436.016	462.92	0.941884	0.0216383	0.055	429.75	430.849	1.00256	0.952147	#	DDX46	AI765169	DEAD (Asp-Glu-Ala-Asp) box polypeptide 46
228041_at	303.894	384.175	0.79103	0.00149055	0.084	311.713	388.94	1.24775	0.00401948		NRPS998	AW772229	2-aminoadipic 6-semialdehyde dehydrogenase
228045_at	339.988	386.63	0.879362	0.0485268	0.054	322.586	383.128	1.18768	0.0223779		SUGT1	BF438106	SGT1, suppressor of G2 allele of SKP1 (S. cerevisiae)
228065_at	331.01	463.545	0.714084	0.00168557	0.095	439.803	578.6	1.31559	0.00109563		BCL9L	AL353962	B-cell CLL/lymphoma 9-like
228118_x_at	616.128	535.716	1.1501	0.00484724	0.014	616.528	528.711	0.857563	0.000862947		---	BE796624	---
228130_at	534.926	465.674	1.14871	0.0155291	0	527.561	459.847	0.871647	0.0109931		ZNF397	AW182556	Zinc finger protein 397
228142_at	637.872	702.496	0.908007	0.0220894	0.019	648.48	722.665	1.1144	0.0501866	#	HSPC051	BE208777	ubiquinol-cytochrome c reductase complex (7.2 kD)
228168_at	981.409	718.514	1.36589	0.0036186	0.082	743.024	716.64	0.964492	0.514948	#	---	AU153583	---
228226_s_at	326.615	296.235	1.10255	0.0190753	0.023	330.512	300.655	0.909664	0.0848522	#	MGC33584	H22636	hypothetical protein MGC33584
228327_x_at	504.108	468.404	1.07623	0.0200299	0	502.529	465.498	0.926309	0.00194388		MEIS3	AL359938	Meis1, myeloid ecotropic viral integration site 1 homolog 3 (mouse)
228346_at	283.304	318.945	0.888254	0.0478441	0.046	279.384	300.508	1.07561	0.111801	#	---	H47630	---
228435_at	1207.31	975.456	1.23769	0.0400253	0.032	1104.21	947.649	0.858215	0.151138	#	---	AL530854	---
228473_at	361.868	336.631	1.07497	0.0307531	0.013	372.389	329.46	0.884721	0.0105199		---	AI421295	---
228512_at	416.205	488.212	0.852509	0.0224688	0.033	400.73	484.028	1.20787	0.0182452		FLJ20758	AW138833	FLJ20758 protein
228551_at	371.795	444.39	0.836639	0.0251214	0.052	369.727	434.995	1.17653	0.0130619		MGC24039	AL137364	hypothetical protein MGC24039
228590_at	459.724	516.779	0.889595	0.0393494	0.028	439.577	514.766	1.17105	0.035568		FLJ20758	AA045257	FLJ20758 protein
228593_at	321.432	298.618	1.0764	0.0117326	0.067	313.254	298.68	0.953478	0.105975	#	LOC339483	AI271425	hypothetical protein LOC339483
228617_at	315.553	293.071	1.07671	0.00142835	0.042	292.932	291.206	0.994109	0.864708	#	HSXIAPAF1	AA142842	XIAP associated factor-1
228621_at	4994.98	4404.41	1.13409	0.0395627	0	4534.84	4326.31	0.954017	0.466246	#	HFE2	AA948096	hemochromatosis type 2 (juvenile)
228634_s_at	445.823	386.076	1.15475	0.0215248	0.032	407.417	389.021	0.954846	0.439443	#	---	BF195718	---
228660_x_at	445.834	765.92	0.58209	0.0227086	0.046	522.114	742.971	1.42301	0.0648045	#	SEMA4F	AA523537	sema domain, immunoglobulin domain (Ig), transmembrane domain (TM) and short cytoplasmic domain, (semaphorin) 4F
228662_at	343.466	394.89	0.869777	0.00667433	0.066	350.194	404.966	1.1564	0.00626684		---	AI492369	---
228669_x_at	416.421	389.662	1.06867	0.0242477	0.044	411.489	387.466	0.941621	0.168083	#	---	BF109873	---
228690_s_at	2108.42	2275.14	0.926719	0.0385286	0.015	2065.5	2262.13	1.0952	0.0702182	#	NDUFA11	AI743115	NADH dehydrogenase (ubiquinone) 1 alpha subcomplex, 11, 14.7kDa
228775_at	932.477	820.725	1.13616	0.0446842	0.077	810.807	809.297	0.998138	0.976644	#	---	W44578	---
228841_at	1194.1	1412.61	0.845315	0.0434444	0.027	1170.22	1368.48	1.16942	0.146058	#	LOC90624	AW299250	Hypothetical protein LOC90624
228845_at	347.48	305.405	1.13777	0.0053218	0.025	346.601	300.308	0.866436	0.0082479		LOC196463	AW451356	hypothetical protein LOC196463
228928_x_at	758.923	874.592	0.867745	0.00555915	0.048	764.459	857.229	1.12135	0.0309338		BANP	AL157429	BTG3 associated nuclear protein
228949_at	283.499	510.646	0.555178	0.0127602	0.005	330.396	494.237	1.49589	0.0374697		FLJ23091	AL534095	putative NFkB activating protein 373
229009_at	400.962	448.055	0.894894	0.0186331	0.048	442.472	460.203	1.04007	0.519512	#	SIX5	AA527770	sine oculis homeobox homolog 5 (Drosophila)
229025_s_at	708.803	849.837	0.834046	0.0196046	0.058	682.209	829.92	1.21652	0.0158848		FLJ25059	AW008627	hypothetical protein FLJ25059
229102_at	446.548	404.079	1.1051	0.0167686	0.093	427.895	408.552	0.954795	0.233247	#	---	BG153401	---
229128_s_at	435.645	533.604	0.81642	0.00245492	0.057	446.013	530.441	1.18929	0.00473309		---	AI697657	---
229388_at	328.321	521.975	0.628999	0.0491784	0.047	389.003	529.162	1.3603	0.133984	#	TTC18	AW274240	Tetratricopeptide repeat domain 18
229396_at	446.079	410.068	1.08781	0.0309779	0.024	438.515	404.644	0.922758	0.0128772		OVOL1	AA588400	ovo-like 1(Drosophila)
229419_at	703.961	580.809	1.21203	0.0421107	0.025	497.008	509.102	1.02433	0.766296	#	---	BF222826	---
229420_at	1429.4	1244.35	1.14871	0.03445	0.038	1304.69	1307.58	1.00221	0.969695	#	---	AI557425	Similar to 60S ribosomal protein L23a
229426_at	332.864	361.311	0.921269	0.0463451	0.086	331.387	354.656	1.07022	0.166332	#	COX5A	BF196691	cytochrome c oxidase subunit Va
229439_s_at	362.325	335.391	1.08031	0.0395978	0.037	366.605	332.59	0.907217	0.00151311		FLJ20273	AI830823	RNA-binding protein
229452_at	397.111	364.063	1.09077	0.0242417	0.07	375.114	361.223	0.962969	0.452144	#	LOC92162	AL544576	similar to RIKEN cDNA 2600017H02
229456_s_at	419.542	396.49	1.05814	0.030898	0.04	406.966	386.489	0.949683	0.0217343		DDAH1	AI885718	Dimethylarginine dimethylaminohydrolase 1
229463_at	384.591	653.049	0.588917	0.0488548	0.073	436.348	633.819	1.45255	0.114617	#	NTRK2	R39159	Neurotrophic tyrosine kinase, receptor, type 2
229481_at	331.506	300.243	1.10413	0.000917313	0	312.837	292.025	0.933475	0.00335305		LOC283859	AI990367	hypothetical protein LOC283859
229567_at	2908.51	3211.65	0.905615	0.0373283	0.051	2857.25	3201.89	1.12062	0.0855864	#	LOC161247	AI742370	similar to CG10671-like
229570_at	297.913	347.858	0.856421	0.0181632	0.04	313.168	337.385	1.07733	0.234703	#	---	BE219071	Transcribed locus, weakly similar to NP_035554.1 nuclear receptor co-repressor 2 [Mus musculus]
229628_s_at	403.062	372.954	1.08073	0.0414668	0.045	412.472	388.323	0.941453	0.275858	#	KIAA1529	AI831514	KIAA1529
229636_at	605.786	453.463	1.33591	0.0435278	0.073	605.24	449.254	0.742274	0.00364002		---	T17299	---
229696_at	347.928	389.298	0.893732	0.045115	0.072	418.854	417.075	0.995753	0.899695	#	---	AI807483	---
229699_at	378.87	428.538	0.884097	0.0493408	0.036	350.268	378.106	1.07947	0.159116	#	---	AW237752	CDNA FLJ45384 fis, clone BRHIP3021987
229758_at	457.152	427.365	1.0697	0.0504781	0.001	441.789	407.249	0.921817	0.066464	#	TIGD5	AW168771	tigger transposable element derived 5
229811_at	434.517	397.606	1.09283	0.0418353	0.064	437.903	402.393	0.918909	0.0624646	#	---	AI307745	---
229838_at	540.529	462.073	1.16979	0.0142105	0.04	517.366	478.105	0.924115	0.142484	#	NUCB2	AI377271	nucleobindin 2
229841_at	776.813	871.673	0.891175	0.0197906	0.047	768.692	840.962	1.09402	0.0586408	#	---	BF223464	---
229909_at	390.874	356.22	1.09728	0.00132218	0.007	384.926	342.372	0.889449	0.00368389		B4GalNac-T3	AI654238	Beta 1,4-N-acetylgalactosaminyltransferase-transferase-III
229917_at	570.596	502.051	1.13653	0.0331237	0.037	569.308	500.249	0.878696	0.120835	#	---	BE551002	---
229922_at	316.477	287.875	1.09935	0.0107143	0.086	308.217	283.128	0.918599	0.0173189		KIAA1893	AI052709	G protein-regulated inducer of neurite outgrowth 1
229929_at	473.715	446.364	1.06127	0.00988986	0.049	473.234	435.298	0.919836	0.00279931		SSB4	AL563476	SPRY domain-containing SOCS box protein SSB-4
229941_at	1053.27	708.199	1.48725	0.0420016	0	970.528	958.836	0.987954	0.953857	#	---	AV709550	Hypothetical gene LOC138729
229965_at	669.599	360.212	1.8589	0.00834968	0.013	383.027	336.68	0.878999	0.36119	#	---	AI653673	---
230031_at	321.475	302.882	1.06139	0.0333475	0.02	321.056	296.267	0.922788	0.0133878		HSPA5	AW052044	heat shock 70kDa protein 5 (glucose-regulated protein, 78kDa)
230079_at	307.02	351.222	0.874148	0.0384137	0.059	318.988	344.892	1.08121	0.0614425	#	ST7L	BF109854	suppression of tumorigenicity 7 like
230084_at	359.035	323.892	1.1085	0.0327136	0.046	346.481	313.2	0.903948	0.000747294		SLC30A2	BF510698	solute carrier family 30 (zinc transporter), member 2
230098_at	388.567	444.333	0.874495	0.0104968	0	382.594	455.245	1.18989	9.40908e-05		---	AW612407	---
230109_at	351.164	380.41	0.923122	0.0336568	0.046	350.901	376.469	1.07286	0.0473305		PDE7B	AI638433	phosphodiesterase 7B
230119_at	697.864	570.408	1.22345	0.0386482	0.053	608.134	557.776	0.917192	0.247569	#	---	AK025975	Transcribed locus, highly similar to NP_808269.1 cDNA sequence BC027828 [Mus musculus]
230167_at	389.347	354.73	1.09759	0.000752603	0.029	393.476	340.839	0.866226	0.00139329		---	W60649	---
230212_at	338.369	355.019	0.9531	0.0272294	0.011	338.626	355.742	1.05055	0.159228	#	---	AW027076	---
230224_at	341.787	408.509	0.83667	0.0185092	0.011	359.619	408.517	1.13597	0.0389681		---	BF446577	Similar to mitochondrial carrier triple repeat 1
230253_at	371.295	343.326	1.08146	0.0204201	0.04	375.455	337.544	0.899025	0.0128014		---	BE674338	---
230439_at	505.787	468.325	1.07999	0.00652867	0.074	482.993	461.772	0.956064	0.229795	#	LOC389458	AW138835	hypothetical gene supported by BC031661
230440_at	420.665	380.261	1.10625	0.0271979	0.055	421.659	383.635	0.909823	0.0637609	#	ZNF469	AW015537	Zinc finger protein 469
230504_at	569.281	506.34	1.1243	0.0113375	0	536.742	514.577	0.958704	0.306613	#	CEAL1	N51729	carcinoembryonic antigen-like 1
230557_at	407.841	340.846	1.19656	0.0119168	0.031	389.385	335.755	0.86227	0.0457475		XRRA1	AW513519	X-ray radiation resistance associated 1
230575_at	250.427	404.611	0.618932	0.0201286	0.061	282.041	386.216	1.36936	0.114581	#	---	AI620189	---
230648_at	524.088	468.646	1.1183	0.035257	0.048	520.319	451.891	0.868489	0.0044112		LOC283663	AI377398	hypothetical protein LOC283663
230800_at	675.169	587.314	1.14959	0.00473079	0.082	659.53	576.569	0.874212	0.00204508		ADCY4	AV699353	adenylate cyclase 4
230851_x_at	612.56	534.216	1.14665	0.0503786	0	617.466	549.63	0.890139	0.00189382		---	AI469972	---
230853_at	651.365	731.381	0.890597	0.0417398	0.043	637.563	687.997	1.0791	0.318166	#	---	AI826903	---
230880_at	969.009	862.747	1.12317	0.033796	0.044	948.586	865.648	0.912566	0.0491378		KIAA1652	AW450772	KIAA1652 protein
230913_at	275.462	328.631	0.838212	0.00332972	0.047	273.949	362.458	1.32308	0.000317121		---	BE674309	Full length insert cDNA clone ZE12B03
230988_at	373.464	335.327	1.11373	0.0497578	0.038	346.06	317	0.916026	0.0915281	#	---	AU149490	---
231047_at	237.464	386.745	0.614007	0.040832	0.047	274.145	400.315	1.46023	0.0968822	#	---	R56808	---
231106_at	766.621	646.538	1.18573	0.0299771	0.015	716.533	662.115	0.924054	0.300597	#	LOC255326	AI684591	hypothetical protein LOC255326
231143_at	511.837	483.12	1.05944	0.032129	0.005	502.811	476.825	0.94832	0.140923	#	---	AW615259	---
231179_at	872.749	1055.35	0.826973	0.0289079	0.048	1349.75	1571.85	1.16455	0.187452	#	---	R99291	---
231207_at	428.081	464.959	0.920687	0.0149081	0.02	442.046	467.809	1.05828	0.167569	#	MRPS30	AW263539	Mitochondrial ribosomal protein S30
231253_at	382.449	317.382	1.20501	0.0206933	0.06	410.513	311.769	0.75946	0.00144522		IMP5	AI653035	intramembrane protease 5
231298_at	583.989	671.119	0.870173	0.0474574	0.035	590.158	630.926	1.06908	0.148446	#	---	BF508603	---
231346_s_at	268.649	413.3	0.650009	0.0367283	0.029	298.41	412.672	1.3829	0.079688	#	---	BF059319	---
231355_at	490.953	446.709	1.09904	0.00162208	0.024	479.967	440.846	0.918494	0.00750465		---	AI827955	CDNA FLJ30598 fis, clone BRAWH2009263
231396_s_at	282.562	398.113	0.709755	0.0501004	0	308.453	393.19	1.27472	0.144079	#	DRCTNNB1A	AA776721	down-regulated by Ctnnb1, a
231404_at	435.724	382.357	1.13957	0.0043001	0.039	441.574	380.228	0.861075	0.00290512		---	BF056874	Transcribed locus, highly similar to NP_919261.1 hypothetical protein FLJ39441 [Homo sapiens]
231407_s_at	412.399	377.376	1.09281	0.00354734	0.012	404.967	374.818	0.925553	0.00530297		FOXH1	AI636647	Forkhead box H1
231454_at	375.122	329.154	1.13965	0.00794208	0.11	369.437	322.506	0.872965	0.0186466		---	R31094	---
231492_at	390.817	325.686	1.19998	0.0074894	0.029	373.426	339.193	0.908328	0.0491746		---	AI950462	---
231497_at	382.16	334.886	1.14117	0.0073189	0.033	361.391	319.582	0.88431	0.00178133		---	AW003006	Transcribed locus, weakly similar to XP_375099.1 hypothetical protein LOC283585 [Homo sapiens]
231691_at	1179.63	938.6	1.2568	0.0124689	0.006	1227.83	970.499	0.790418	0.000765687		CPLP	AV700829	Similar to Complement C3 precursor
231840_x_at	509.189	587.792	0.866273	0.00374044	0.055	493.545	575.75	1.16656	0.0395037		---	AK000803	---
231880_at	509.196	568.669	0.895417	0.0258764	0.097	513.577	565.844	1.10177	0.0551169	#	FAM40B	AB032996	Family with sequence similarity 40, member B
231959_at	820.936	901.268	0.910868	0.0442557	0.088	782.944	873.679	1.11589	0.00373626		C14orf46	AK023979	chromosome 14 open reading frame 46
232029_at	319.686	297.868	1.07325	0.0351479	0.06	310.904	271.019	0.871711	0.00747965		ZNF451	AK023072	KIAA1702 protein
232066_x_at	770.244	697.954	1.10357	0.0257303	0.057	752.097	726.678	0.966203	0.448784	#	MGC21675	AL390154	hypothetical protein MGC21675
232190_x_at	838.413	742.066	1.12984	0.032123	0.065	819.186	736.912	0.899566	0.10896	#	LOC115110	AI393958	hypothetical protein LOC115110
232191_at	462.708	766.9	0.603348	0.019837	0.057	516.175	744.172	1.4417	0.0577397	#	C21orf105	BC005107	chromosome 21 open reading frame 105
232201_at	352.343	321.318	1.09655	0.0078564	0.056	340.381	319.748	0.939382	0.133233	#	NKD2	BC004940	naked cuticle homolog 2 (Drosophila)
232299_at	325.243	288.087	1.12898	0.00198516	0.052	313.329	283.748	0.90559	0.0263485		UNQ830	AK026304	ASCL830
232382_s_at	701.133	878.777	0.79785	0.0247945	0.025	631.907	895.894	1.41776	0.00434543		LOC115294	BE150929	similar to hypothetical protein FLJ10883
232470_at	467.685	436.244	1.07207	0.01894	0	460.332	424.817	0.922849	0.011154		SNF1LK	AP001751	SNF1-like kinase
232498_at	594.275	1056.86	0.562302	0.0239817	0.021	651.213	988.025	1.51721	0.0686769	#	KIAA1833	AK023386	hypothetical protein KIAA1833
232513_x_at	414.762	375.542	1.10444	0.0273129	0.046	413.129	368.78	0.89265	0.00334773		---	AI634422	---
232573_at	349.537	305.91	1.14261	0.0489105	0.02	321.766	271.901	0.845029	0.0176062		FBXO32	AL389956	F-box protein 32
232608_x_at	311.219	290.689	1.07062	0.0231072	0.043	294.51	280.484	0.952375	0.232806	#	CARD14	AI950942	caspase recruitment domain family, member 14
232620_at	502.543	447.488	1.12303	0.0101692	0.017	472.017	437.94	0.927805	0.0588602	#	LOC56964	AL390084	hypothetical protein from EUROIMAGE 384293
232729_at	382.593	324.691	1.17833	0.0059106	0.057	320.776	298.851	0.931652	0.17437	#	---	AK023391	---
232776_at	562.181	460.63	1.22046	0.00433243	0.081	552.296	452.931	0.820087	0.000929945		PDZRN3	AU145289	PDZ domain containing RING finger 3
232831_at	328.166	302.473	1.08494	0.0386885	0.025	312.776	298.358	0.953905	0.136743	#	LRFN5	AA805239	Leucine rich repeat and fibronectin type III domain containing 5
232834_at	341.097	322.831	1.05658	0.0332719	0.03	340.554	323.669	0.950418	0.0354796		---	AU146764	Transcribed locus, moderately similar to XP_375099.1 hypothetical protein LOC283585 [Homo sapiens]
232845_at	324.758	294.443	1.10296	0.0222613	0.011	313.192	285.616	0.911954	0.0821513	#	CDH23	AL122081	cadherin-like 23
232909_s_at	449.216	484.782	0.926635	0.0399402	0.049	458.36	491.806	1.07297	0.022455		FALZ	AU146870	fetal Alzheimer antigen
232937_at	472.897	447.89	1.05583	0.0306399	0.05	458.215	440.732	0.961846	0.145663	#	LRCH1	AK023616	Leucine-rich repeats and calponin homology (CH) domain containing 1
233057_at	397.699	367.928	1.08091	0.0450794	0.063	393.19	373.112	0.948935	0.34761	#	HSPB8	BF109740	heat shock 22kDa protein 8
233158_at	596.077	824.587	0.722879	0.00869996	0.048	611.75	776.976	1.27009	0.00846905		KRTHB2	AI082251	keratin, hair, basic, 2
233206_at	361.515	540.751	0.668543	0.0479283	0.036	399.329	522.305	1.30796	0.145698	#	C6orf85	AL110245	chromosome 6 open reading frame 85
233230_s_at	301.458	356.73	0.845059	0.00788268	0.031	314.719	356.15	1.13165	0.00242353		KIAA1458	AV723459	KIAA1458 protein
233235_x_at	455.794	412.792	1.10418	0.0191276	0.043	458.26	396.072	0.864296	0.0121456		---	AK025096	---
233334_x_at	553.504	498.512	1.11031	0.00115417	0.045	569.306	506.72	0.890066	0.00471691		MGC5178 /// SULT1A3	AK027092	hypothetical protein MGC5178 /// sulfotransferase family, cytosolic, 1A, phenol-preferring, member 3
233361_at	722.873	535.95	1.34877	0.0195213	0.049	651.86	540.204	0.828711	0.0153732		LOC91526	AL133087	hypothetical protein DKFZp434D2328
233378_at	549.575	463.034	1.1869	0.00893725	0	484.104	442.039	0.913108	0.0028841		RUFY1	AK025118	RUN and FYVE domain containing 1
233383_at	430.68	805.683	0.534552	0.0117035	0.029	481.44	765.134	1.58926	0.0411987		---	AU156482	Transcribed locus, moderately similar to XP_345434.1 similar to ribosomal protein L31 [Rattus norvegicus]
233424_at	453.296	417.122	1.08672	0.0390345	0.03	451.696	398.638	0.882535	0.0132152		NRXN1	AU146874	Neurexin 1
233525_s_at	611.765	489.244	1.25043	0.000613164	0.051	554.053	478.435	0.863519	0.00526302		C9orf44	AK023662	chromosome 9 open reading frame 44
233535_at	484.654	422.081	1.14825	0.00126853	0.032	466.871	402.128	0.861326	0.00229886		DKFZp761I1011	AL512736	hypothetical protein DKFZp761I1011
233541_at	455.267	421.164	1.08097	0.0302986	0.039	451.763	392.246	0.868256	0.00120641		---	AK026206	CDNA: FLJ22553 fis, clone HSI01074, highly similar to HSA132408 Homo sapiens mRNA for LIM domains containing protein 1
233586_s_at	346.898	318.443	1.08936	0.000809683	0.091	347.356	323.128	0.93025	0.0737072	#	KLK12	AI394679	kallikrein 12
233588_x_at	472.79	437.339	1.08106	0.036996	0.085	462.681	425.729	0.920135	0.0137497		HKE2	BE561798	HLA class II region expressed gene KE2
233665_x_at	329.427	359.668	0.915917	0.0284956	0.051	331.89	357.443	1.07699	0.0525089	#	MTO1	AK026073	mitochondrial translation optimization 1 homolog (S. cerevisiae)
233673_at	335.631	293.26	1.14448	0.00736721	0.018	316.711	291.848	0.921496	0.0452551		LOC339524	BC000825	hypothetical protein LOC339524
233741_at	518.146	468.525	1.10591	0.023462	0.036	498.881	463.69	0.92946	0.0293417		FTCD	AL109817	formiminotransferase cyclodeaminase
233803_s_at	491.195	413.753	1.18717	0.00498767	0.118	481.104	385.402	0.801079	0.000202643		MYBBP1A	AL136595	MYB binding protein (P160) 1a
233849_s_at	321.57	383.927	0.83758	0.0431233	0.052	349.057	419.146	1.20079	0.00759465		ARHGAP5	AK023014	Rho GTPase activating protein 5
233873_x_at	609.762	548.142	1.11242	0.0305285	0.033	563.507	572.13	1.0153	0.814683	#	PAPD1	AL122121	PAP associated domain containing 1
233955_x_at	1525.65	2040.32	0.747751	0.00810332	0.007	2065.55	2448.2	1.18525	0.0752228	#	CXXC5	AK001782	CXXC finger 5
233979_s_at	365.512	314.332	1.16282	0.00136756	0.038	354.395	305.535	0.862131	0.00261418		ESPN	AI927458	espin
234065_at	359.297	312.762	1.14879	0.000270436	0.036	351.575	302.745	0.861111	0.000199369		---	AU144825	Transcribed locus, weakly similar to XP_343448.1 similar to ORF4 [Rattus norvegicus]
234199_at	396.025	349.32	1.1337	0.0032074	0.015	388.351	342.85	0.882835	0.0160877		SLC24A3	AK025286	Solute carrier family 24 (sodium/potassium/calcium exchanger), member 3
234207_at	317.916	389.942	0.815289	0.0441325	0.074	328.616	364.733	1.10991	0.182918	#	---	AK025017	CDNA: FLJ21364 fis, clone COL02989
234294_x_at	368.769	409.032	0.901566	0.0345665	0	388.983	435.855	1.1205	0.0699236	#	p66alpha	AL390164	p66 alpha
234452_at	429.03	362.933	1.18212	0.015701	0.034	394.458	355.231	0.900554	0.175342	#	HIBADH	AK025558	3-hydroxyisobutyrate dehydrogenase
234552_at	375.589	348.653	1.07726	0.0415237	0.04	380.677	326.002	0.856373	0.00530719		---	AK000090	CDNA FLJ20083 fis, clone COL03440
234554_at	528.335	472.985	1.11702	0.0429976	0.039	513.3	461.844	0.899754	0.000370778		KCNK16	AL136087	potassium channel, subfamily K, member 16
234619_at	480.22	435.768	1.10201	0.0151715	0.044	455.61	408.763	0.897177	0.0197054		---	AK025126	---
234627_at	360.689	327.753	1.10049	0.0483354	0.056	352.275	323.767	0.919076	0.0223881		---	AK025061	Hypothetical gene supported by AK025061
234644_x_at	325.01	511.179	0.635804	0.00666091	0.027	353.725	531.636	1.50296	0.0154366		---	AK026079	Transcribed locus, weakly similar to XP_375099.1 hypothetical protein LOC283585 [Homo sapiens]
234647_at	424.087	378.342	1.12091	0.00285358	0.051	417.049	364.208	0.873298	0.00392312		---	AK026052	---
234696_at	920.324	758.17	1.21388	0.0265428	0.005	872.686	748.116	0.857257	0.0749983	#	---	AL136097	---
234707_x_at	876.809	766.912	1.1433	0.0177615	0.057	844.911	754.26	0.892709	0.0138485		---	U96394	---
234721_s_at	344.968	298.205	1.15682	0.016568	0.034	348.733	301.837	0.865527	0.00010475		CYP26B1	AC007002	cytochrome P450, family 26, subfamily B, polypeptide 1
234734_s_at	562.982	617.518	0.911684	0.0120904	0.058	583.881	627.69	1.07503	0.0995483	#	TNRC6	AK025696	trinucleotide repeat containing 6
234881_at	389.373	365.855	1.06428	0.0438451	0.065	380.173	351.343	0.924166	0.0108833		---	L33988	---
234915_s_at	436.094	465.716	0.936396	0.0228643	0.016	449.349	457.928	1.01909	0.599029	#	DENR	BC000925	density-regulated protein
234999_at	749.542	696.91	1.07552	0.0320738	0.045	722.715	677.721	0.937744	0.27681	#	FLJ36888	BE297801	hypothetical protein FLJ36888
235004_at	4676.04	4286.24	1.09094	0.0220191	0.026	4737.52	4542.65	0.958866	0.337815	#	RBM24	AI677701	RNA binding motif protein 24
235033_at	302.108	491.625	0.614509	0.0278514	0.062	347.202	503.675	1.45067	0.0425147		NPEPL1	AL577823	Aminopeptidase-like 1
235053_at	307.877	378.563	0.813277	0.0392238	0.019	327.462	364.549	1.11326	0.184744	#	COX11	AI077461	COX11 homolog, cytochrome c oxidase assembly protein (yeast)
235054_at	285.461	319.319	0.893968	0.00679775	0.013	284.212	306.196	1.07735	0.0447581		FLJ31265	BF941983	hypothetical protein FLJ31265
235174_s_at	329.337	378.043	0.871165	0.0152278	0.067	327.552	366.268	1.1182	0.117672	#	---	AW952781	CDNA clone IMAGE:5286843, partial cds
235218_x_at	827.301	770.665	1.07349	0.0190099	0.016	799.465	761.084	0.951993	0.134154	#	THAP6	BF339201	THAP domain containing 6
235332_at	326.123	304.065	1.07254	0.0184075	0.076	309.795	298.482	0.963483	0.403798	#	---	AW501360	Hypothetical LOC387697
235372_at	332.388	469.841	0.707447	0.00993852	0.062	366.173	460.974	1.25889	0.0288103		FREB	AW575245	Fc receptor homolog expressed in B cells
235383_at	725.589	634.983	1.14269	0.0383177	0	732.451	606.565	0.828131	0.00106047		MYO7B	AA552060	myosin VIIB
235427_at	457.659	574.399	0.796762	0.0209913	0.031	485.477	537.105	1.10634	0.175804	#	---	AA418074	---
235433_at	810.85	933.106	0.868979	0.0455465	0.078	791.108	898.095	1.13524	0.042329		SATL1	BG290639	Spermidine/spermine N1-acetyl transferase-like 1
235479_at	747.595	632.185	1.18256	0.0139161	0.058	703.061	613.447	0.872537	0.0326127		CPEB2	AI948598	cytoplasmic polyadenylation element binding protein 2
235507_at	764.086	892.636	0.855988	0.0254138	0.042	778.439	934.877	1.20096	0.0224002		LOC115294	AA461195	similar to hypothetical protein FLJ10883
235659_at	426.884	407.651	1.04718	0.0270894	0.022	410.831	399.36	0.972077	0.202403	#	---	AI742077	---
235722_at	300.824	392.777	0.765889	0.0089241	0.073	274.211	362.039	1.32029	0.0345675		SYNJ2BP	AI671431	Synaptojanin 2 binding protein
235753_at	1108.57	964.033	1.14993	0.00109421	0.044	1079.26	912.024	0.845046	0.00459256		---	AI492051	---
235804_at	469.251	426.779	1.09952	0.0254167	0.051	465.524	411.178	0.883258	0.00192831		---	T86613	---
235806_at	500.266	450.587	1.11025	0.018587	0.008	467.645	430.831	0.921278	0.0883812	#	ARAP3	AI660186	ARF-GAP, RHO-GAP, ankyrin repeat and plekstrin homology domains-containing protein 3
235812_at	639.453	705.201	0.906767	0.0242904	0.08	653.326	697.165	1.0671	0.0290443		FLJ38101	AI935115	hypothetical protein FLJ38101
235850_at	402.19	474.974	0.846761	0.0109536	0.039	403.309	477.216	1.18325	0.00382169		---	BF434228	---
235855_at	328.346	292.709	1.12175	0.0318307	0.022	328.667	301.469	0.917247	0.121928	#	---	AA535888	---
235900_at	456.985	688.255	0.663976	0.0446589	0	505.8	691.399	1.36694	0.114125	#	MGC29671	AW016030	hypothetical protein MGC29671
235908_at	515.543	485.577	1.06171	0.0299088	0.1	522.803	495.236	0.947271	0.0849259	#	MMP11	AW511464	matrix metalloproteinase 11 (stromelysin 3)
235941_s_at	453.816	379.426	1.19606	0.01202	0.09	435.65	380.495	0.873397	0.0284222		LOC159110 /// LOC401630	AI272059	hypothetical protein LOC159110 /// LOC401630
236038_at	334.759	405.385	0.82578	0.0170787	0.061	332.361	392.287	1.1803	0.236009	#	---	N50714	---
236049_at	578.186	497.36	1.16251	0.00378688	0.078	587.274	494.314	0.84171	0.00153837		---	AI277101	---
236098_at	365.133	325.264	1.12258	0.000257106	0	343.377	315.399	0.91852	0.0179719		---	AA429598	CDNA clone IMAGE:4557810, partial cds
236110_at	905.428	806.392	1.12281	0.0364794	0.023	910.799	791.523	0.869043	0.000405105		LOC147343	BF968243	hypothetical protein LOC147343
236137_at	536.458	483.779	1.10889	0.0126037	0.08	510.443	479.409	0.939202	0.234216	#	---	AW139055	---
236232_at	434.522	394.37	1.10181	0.0160512	0	426.865	402.464	0.942836	0.156232	#	---	BF509528	---
236265_at	522.077	621.327	0.840262	0.0404498	0.058	511.604	578.608	1.13097	0.15445	#	---	BF438799	Homo sapiens, clone IMAGE:3887266, mRNA
236282_at	502.98	441.116	1.14025	0.0222928	0.023	489.897	455.831	0.930464	0.108138	#	---	AA769100	Homo sapiens, clone IMAGE:4826240, mRNA
236286_at	412.23	538.282	0.765826	0.00436874	0	433.084	528.25	1.21974	0.0543298	#	PROCA1	AI887588	proline-rich cyclin A1-interacting protein
236298_at	530.31	453.768	1.16868	0.0208345	0.052	501.735	435.522	0.868032	0.0358725		---	W88801	---
236435_at	480.773	405.914	1.18442	0.00553509	0.028	444.358	411.634	0.926355	0.227913	#	---	BE219036	---
236479_at	484.886	426.2	1.1377	0.0267004	0.023	451.83	396.679	0.877937	0.0525142	#	---	BF513986	---
236482_at	392.08	361.128	1.08571	0.036971	0.081	377.742	355.123	0.94012	0.173617	#	---	AA459271	---
236490_at	396.089	613.515	0.645606	0.0342085	0.025	443.469	634.214	1.43012	0.0506661	#	---	AI038052	---
236546_at	466.473	811.439	0.574872	0.00723019	0.021	514.917	811.92	1.5768	0.0171101		---	AU152069	---
236563_at	411.322	346.433	1.18731	0.014022	0.049	396.547	340.222	0.857961	0.00187542		C1orf36	AA719822	chromosome 1 open reading frame 36
236587_at	275.617	329.208	0.837212	0.0308308	0.002	285.982	307.098	1.07384	0.265542	#	---	AI521902	---
236632_at	617.29	511.454	1.20693	0.00424914	0.027	646.067	537.408	0.831814	0.026108		---	AA149654	Homo sapiens, clone IMAGE:5311619, mRNA
236640_at	384.304	353.964	1.08572	0.0153417	0.035	369.813	335.576	0.90742	0.030216		---	AI638169	---
236660_at	276.75	348.645	0.793787	0.00809888	0.061	299.894	376.548	1.2556	0.0034293		---	N25555	---
236674_at	412.623	487.784	0.845913	0.0484833	0.039	433.008	470.851	1.08739	0.308738	#	---	AW006359	Hypothetical LOC388780
236675_at	460.619	579.814	0.794426	0.0384298	0.059	437.604	560.543	1.28093	0.0390785		---	AI091214	---
236677_at	361.915	319.956	1.13114	0.013876	0.063	356.538	316.858	0.888707	0.0130711		NGB	BF510662	neuroglobin
236701_at	424.318	391.801	1.08299	0.0387038	0.033	428.545	387.128	0.903354	0.00353869		MGC18079	R38095	hypothetical protein MGC18079
236776_at	358.497	334.662	1.07122	0.00782869	0	358.898	329.686	0.918606	0.0442663		---	AI885368	CDNA FLJ42077 fis, clone SYNOV2019280
236801_at	280.787	345.887	0.811789	0.0459283	0.063	301.731	347.89	1.15298	0.157726	#	---	T61953	---
236802_at	459.19	415.736	1.10452	0.0334955	0.012	452.111	407.337	0.900968	0.0379138		---	AI732132	---
236804_at	777.691	687.047	1.13193	0.00425944	0.041	737.921	672.553	0.911416	0.001697		---	AW296205	---
236855_at	323.101	292.95	1.10292	0.0294055	0.066	323.355	302.845	0.936574	0.101509	#	---	R43204	CDNA FLJ37402 fis, clone BRAMY2028072
236912_at	394.584	358.261	1.10139	0.00850717	0.059	392.533	349.087	0.889319	0.00881588		---	AI962630	---
236913_at	466.135	402.396	1.1584	0.0302646	0	429.726	397.331	0.924615	0.180602	#	---	H05785	---
236972_at	2125.26	1657.4	1.28229	0.0310678	0.105	1672.31	1283.03	0.767222	0.0167924		RNF28	AI351421	ring finger protein 28
237012_at	344.551	304.079	1.1331	0.0249581	0.029	327.411	300.11	0.916617	0.153885	#	---	BF510602	---
237013_at	352.642	328.934	1.07207	0.044887	0.035	341.196	328.725	0.963449	0.303693	#	---	BF116038	---
237051_at	245.936	366.534	0.670977	0.00775415	0.036	248.657	353.187	1.42038	0.0198823		---	AI890591	---
237230_at	376.484	354.126	1.06313	0.0216613	0.011	378.52	353.143	0.932957	0.0525731	#	GPHA2	AI693322	glycoprotein hormone alpha 2
237320_at	281.628	441.823	0.637423	0.0199672	0.068	321.824	424.949	1.32044	0.12658	#	LOC346653	AI126168	hypothetical protein LOC346653
237367_x_at	472.551	601.101	0.786144	0.0349525	0.043	494.27	579.193	1.17182	0.146599	#	CFLAR	AA971429	CASP8 and FADD-like apoptosis regulator
237434_x_at	351.409	326.031	1.07784	0.0366492	0.056	350.419	322.184	0.919425	0.0796597	#	---	AI699506	Hypothetical gene supported by BC043530
237437_s_at	350.797	326.616	1.07404	0.00442022	0	343.879	313.102	0.9105	0.018404		ADARB2	AI826996	adenosine deaminase, RNA-specific, B2 (RED2 homolog rat)
237455_at	355.209	320.627	1.10786	0.00285492	0.042	346.437	308.247	0.889763	0.000397408		---	BF436704	---
237607_at	521.082	450.904	1.15564	0.00127707	0.052	497.937	443.975	0.891629	0.0188416		---	AW204566	---
237642_at	484.415	624.513	0.775668	0.0107084	0.083	520.741	625.37	1.20092	0.0498069		---	AI732739	CDNA FLJ34123 fis, clone FCBBF3009978
237659_at	386.381	349.565	1.10532	0.00802105	0.083	382.156	358.558	0.938249	0.0889245	#	FLJ40288	AW134826	hypothetical protein FLJ40288
237708_at	436.361	374.345	1.16567	0.00162386	0.066	397.889	373.071	0.937626	0.20875	#	---	BF509793	---
237721_s_at	419.363	385.821	1.08694	0.0193038	0.038	391.315	378.163	0.96639	0.388536	#	ASB4	BE220587	ankyrin repeat and SOCS box-containing 4
237731_at	405.84	330.784	1.2269	0.0436557	0.024	394.581	328.378	0.832219	0.0390749		LOC154092	AW665570	hypothetical protein LOC154092
237772_at	376.43	352.231	1.0687	0.0244314	0.007	377.037	342.956	0.90961	0.0108694		---	AI732275	---
237861_at	339.174	458.518	0.739719	0.0211484	0.032	364.287	492.411	1.35171	0.0237694		---	BF062238	Transcribed locus, weakly similar to XP_375099.1 hypothetical protein LOC283585 [Homo sapiens]
237882_at	359.008	328.255	1.09369	0.00373022	0.037	346.615	333.917	0.963366	0.368515	#	---	AI656634	---
237977_at	370.474	343.445	1.0787	0.0220514	0.038	364.566	332.012	0.910705	0.0724547	#	---	AI215189	---
237991_at	288.386	502.246	0.574193	0.0159098	0.041	344.019	541.821	1.57498	0.0433006		---	N30071	---
238020_at	400.727	442.542	0.905511	0.0335456	0.053	379.772	444.468	1.17035	0.00532202		---	BG166796	---
238051_x_at	419.074	372.565	1.12484	0.0346905	0.066	419.101	359.059	0.856736	0.0096715		PWWP2	AI918314	PWWP domain containing 2
238230_x_at	334.497	319.241	1.04779	0.0429572	0.059	321.077	309.674	0.964486	0.201187	#	MAN2C1	AI656745	Mannosidase, alpha, class 2C, member 1
238259_at	874.67	743.226	1.17686	0.0116017	0.037	834.64	750.352	0.899013	0.0522526	#	---	AA853991	---
238380_s_at	344.649	531.515	0.648427	0.0283705	0.053	387.448	531.713	1.37235	0.0685317	#	---	AW205017	---
238396_at	325.066	291.933	1.1135	0.0306899	0.001	320.739	279.135	0.870288	0.00156567		---	AW876301	---
238558_at	429.988	369.88	1.16251	0.040607	0.067	396.754	369.987	0.932534	0.326071	#	---	AI445833	---
238559_at	292.608	501.205	0.583809	0.0304544	0.019	351.842	490.42	1.39387	0.11695	#	---	AI269471	CDNA clone IMAGE:5266242, partial cds
238601_at	937.827	1074.57	0.872746	0.0424228	0.071	863.72	1062.79	1.23048	0.0278393		---	AI798207	---
238638_at	388.567	707.431	0.549265	0.0116915	0.052	440.705	719.151	1.63182	0.0247696		SLC37A2	AI935644	solute carrier family 37 (glycerol-3-phosphate transporter), member 2
238719_at	290.497	324.829	0.894309	0.0423484	0.035	297.316	332.533	1.11845	0.0705762	#	---	BF060712	---
238754_at	576.075	514.394	1.11991	0.0414758	0	574.683	505.339	0.879336	0.0499334		PTCH	BF509150	Patched homolog (Drosophila)
238763_at	286.073	373.206	0.766529	0.0117527	0.033	368.397	537.937	1.46021	0.00508454		RBM20	AI539118	RNA binding motif protein 20
238773_at	412.013	453.264	0.908992	0.0435122	0.008	406.346	432.257	1.06377	0.167312	#	FLJ33979	AA251906	hypothetical protein FLJ33979
238830_at	534.427	589.883	0.905987	0.0467823	0.063	536.938	574.053	1.06912	0.207588	#	---	BE675872	---
238878_at	533.707	659.857	0.808822	0.0034348	0.039	582.044	707.731	1.21594	0.0040661		ARX	AA496211	aristaless related homeobox
238998_x_at	275.885	435.144	0.634007	0.0495617	0.079	304.123	422.516	1.38929	0.103014	#	---	AI991964	---
239087_at	410.358	751.768	0.545858	0.0169614	0.043	488.262	713.614	1.46154	0.0846521	#	FLJ38819	BE871236	hypothetical protein FLJ38819
239121_at	367.53	341.749	1.07544	0.0451758	0.065	367.48	330.331	0.89891	0.00387126		---	AI247478	---
239225_at	666.672	610.74	1.09158	0.0273254	0.121	682.13	585.659	0.858573	0.00441686		---	AI161380	---
239234_at	319.427	300.993	1.06124	0.041293	0.03	308.886	292.394	0.946609	0.162269	#	---	AW452419	---
239288_at	317.059	363.465	0.872325	0.0152103	0.029	308.7	361.801	1.17202	0.0229115		TNIK	BF431017	TRAF2 and NCK interacting kinase
239359_at	425.524	384.611	1.10638	0.0172015	0.056	407.499	371.463	0.911569	0.00731177		---	AA383208	Similar to hypothetical protein BC009489
239366_at	305.167	475.969	0.64115	0.0476655	0.018	338.753	475.505	1.40369	0.090819	#	---	AI651039	---
239386_at	484.013	420.96	1.14978	0.0165545	0.095	470.855	404.253	0.858551	0.00793498		---	BF508952	---
239424_at	336.011	307.202	1.09378	0.00237302	0.023	331.442	310.342	0.936338	0.0776236	#	---	AA701507	---
239485_at	340.14	574.979	0.591569	0.0210086	0.057	387.052	559.781	1.44627	0.0689994	#	---	BF195383	---
239531_at	358.476	314.603	1.13945	0.00839693	0.058	346.019	303.158	0.876131	0.00305933		---	AA824624	---
239615_at	352.352	314.733	1.11953	0.00525272	0.087	338.045	317.12	0.9381	0.0778805	#	SLC22A5	AI768445	solute carrier family 22 (organic cation transporter), member 5
239628_at	366.226	350.311	1.04543	0.035415	0.025	369.818	344.394	0.931252	0.0404696		---	AI565624	---
239662_x_at	447.354	410.289	1.09034	0.0342263	0.059	441.067	402.377	0.912281	0.0499048		---	BE465909	---
239663_x_at	688.733	755.434	0.911705	0.0428992	0.041	668.332	736.536	1.10205	0.0317983		LARP	AI768454	Likely ortholog of mouse la related protein
239676_x_at	316.044	289.621	1.09123	0.0466607	0	316.052	285.136	0.902182	0.0453543		KIAA1545	BG397169	KIAA1545 protein
239678_at	339.856	373.519	0.909878	0.0413062	0.014	322.795	379.449	1.17551	0.0590286	#	---	AL041224	---
239681_at	372.554	343.386	1.08494	0.00477997	0.027	367.183	343.411	0.935258	0.0713711	#	FLJ31528	AA251505	hypothetical protein FLJ31528
239752_at	375.349	421.575	0.890347	0.0114891	0.031	392.426	456.863	1.1642	0.0503554	#	---	BE551781	Transcribed locus, highly similar to XP_376048.1 similar to FKSG60 [Homo sapiens]
239859_x_at	458.756	419.492	1.0936	0.0419463	0.026	454.604	421.491	0.927161	0.0398217		---	AW140122	---
239866_at	339.055	385.09	0.880455	0.0259199	0.064	331.995	384.937	1.15946	0.111886	#	---	AA705933	CDNA FLJ14392 fis, clone HEMBA1003166
239882_at	362.705	325.067	1.11579	0.00258009	0.056	335.184	325.561	0.971289	0.344444	#	---	AW139113	Non-coding transcript, polyA signal, clone 48-E/2.4Kb
239960_x_at	353.497	405.043	0.872738	0.00649153	0	345.276	389.125	1.127	0.0310006		---	AW303539	---
239980_at	433.448	754.475	0.574504	0.0192683	0.068	520.588	763.729	1.46705	0.0535167	#	---	AI651638	---
240198_at	1126.05	947.529	1.18841	0.0181729	0.04	1038	846.389	0.815401	0.00138919		---	AA348683	---
240282_at	310.933	292.929	1.06146	0.0417321	0.042	308.864	280.798	0.909131	0.0468379		WDR1	AW770902	WD repeat domain 1
240321_at	330.803	302.004	1.09536	0.0245654	0.025	319.044	301.674	0.945556	0.0566046	#	---	AA935659	---
240363_at	768.199	676.848	1.13497	0.0055822	0.025	785.244	648.155	0.825419	0.0084413		ANK1	AW044553	Ankyrin 1, erythrocytic
240379_at	535.14	606.215	0.882756	0.0331346	0	555.636	609.033	1.0961	0.060874	#	---	AA845608	---
240439_at	389.8	328.453	1.18678	0.00660537	0.051	375.245	328.18	0.874573	0.00247728		---	AW276240	---
240635_at	341.381	634.277	0.53822	0.0140204	0.059	400.017	636.34	1.59078	0.0330634		---	BE220436	---
240687_at	386.2	463.502	0.833223	0.0297769	0.019	400.792	447.381	1.11624	0.105541	#	PASD1	AW268858	PAS domain containing 1
240692_at	456.322	422.387	1.08034	0.00833007	0.044	449.004	423.777	0.943815	0.10161	#	MGC34796	AI809153	SPR pseudogene
240774_at	416.699	387.231	1.0761	0.0349346	0.046	407.502	374.326	0.918585	0.0158326		---	AI692536	---
240884_at	330.33	308.178	1.07188	0.0384133	0.017	327.915	301.683	0.920004	0.0280423		---	AA625872	---
240897_at	459.187	422.927	1.08574	0.0221141	0.062	445.03	404.438	0.908788	0.00726794		---	AW779654	---
241006_at	362.368	330.608	1.09607	0.0201309	0.071	363.512	328.582	0.90391	0.0268947		---	AW449100	---
241227_at	527.513	916.772	0.575403	0.0236719	0	597.598	896.098	1.4995	0.054781	#	---	AI654982	---
241475_at	515.158	433.125	1.1894	0.0126711	0.045	519.795	440.877	0.848174	0.0618338	#	---	AA420998	Similar to hypothetical protein
241476_at	414.787	696.873	0.595212	0.0284035	0.048	475.588	644.915	1.35604	0.14167	#	---	AW205775	---
241517_at	314.303	372.466	0.843845	0.0121113	0.045	310.176	360.49	1.16221	0.00430815		---	AA703346	---
241617_x_at	559.334	410.118	1.36384	0.00012186	0.038	495.853	416.653	0.840274	0.00601262		---	BE961949	---
241697_at	519.535	893.555	0.581425	0.0229469	0.079	590.834	868.514	1.46998	0.0576685	#	---	AA811377	---
241718_x_at	601.163	522.785	1.14992	0.00909772	0.034	556.979	519.018	0.931845	0.034823		---	AI148165	---
241771_at	296.38	401.595	0.738007	0.0451556	0.029	329.024	378.271	1.14968	0.296841	#	KIAA0318	AA889573	RIM binding protein 2
241783_at	302.03	481.087	0.627808	0.0294888	0.066	334.971	489.634	1.46172	0.073105	#	---	AI826833	---
241822_at	373.921	528.278	0.707812	0.0357858	0	408.542	520.252	1.27343	0.100038	#	---	AW297226	---
241921_x_at	424.59	375.744	1.13	0.0125145	0.059	421.261	390.491	0.926959	0.17063	#	---	AW015517	---
241923_x_at	320.527	290.376	1.10384	0.00164299	0.071	306.261	285.598	0.932532	0.133055	#	---	T77440	---
241927_x_at	328.297	301.286	1.08965	0.0311841	0.02	332.842	305.94	0.919174	0.0258115		---	AI199095	---
241968_at	430.518	472.308	0.911519	0.0236359	0.047	424.961	469.811	1.10554	0.0178262		---	AI863954	---
241980_at	329.856	305.778	1.07874	0.0189892	0.041	330.478	300.03	0.907868	0.0248816		MAP6	BF338958	microtubule-associated protein 6
241996_at	442.893	711.065	0.622859	0.042732	0.012	479.342	698.255	1.4567	0.0665498	#	---	AI669591	---
242041_at	311.806	396.323	0.786748	0.0366203	0.052	330.664	395.803	1.19699	0.100754	#	FLJ22490	AI933671	hypothetical protein FLJ22490
242087_x_at	366.321	269.755	1.35798	0.0127822	0.064	319.848	294.444	0.920576	0.32452	#	---	AI216347	---
242148_at	328.107	310.279	1.05746	0.0492521	0.046	328.835	303.859	0.924046	0.0365047		---	BF436672	---
242149_at	286.302	331.649	0.863267	0.00472746	0.011	291.891	316.843	1.08548	0.208975	#	---	R02709	CAMP-binding guanine nucleotide exchange factor IV (cAMP-GEFIV) mRNA, clone W15, partial sequence
242235_x_at	915.266	831.975	1.10011	0.0462654	0	870.509	861.581	0.989744	0.833171	#	NRD1	AW978721	Nardilysin (N-arginine dibasic convertase)
242290_at	544.738	405.476	1.34346	0.00221732	0.044	524.292	386.968	0.738077	0.00220584		TACC1	BE676272	transforming, acidic coiled-coil containing protein 1
242407_at	367.347	347.986	1.05564	0.00816575	0.041	362.703	350.018	0.965025	0.292056	#	---	H71242	---
242479_s_at	346.099	319.055	1.08476	0.00833201	0.057	347.287	308.303	0.887746	0.00266518		---	N27515	---
242510_at	775.194	588.997	1.31613	0.00562892	0.09	721.909	640.51	0.887244	0.0700927	#	---	BF511893	---
242648_at	391.129	435.698	0.897707	0.0170204	0.069	356.257	443.008	1.24351	0.0011845		KLHL8	BE858995	kelch-like 8 (Drosophila)
242697_at	350.518	511.794	0.684881	0.0333168	0.081	391.685	496.16	1.26673	0.14267	#	ZNF540	BE466117	zinc finger protein 540
242745_at	334.757	310.37	1.07857	0.0266906	0.075	326.376	298.966	0.916017	0.0579496	#	CASR	AI766210	calcium-sensing receptor (hypocalciuric hypercalcemia 1, severe neonatal hyperparathyroidism)
242808_at	343.382	313.094	1.09674	0.0122089	0.033	318.514	320.192	1.00527	0.884091	#	---	AI733287	---
242997_at	359.512	306.289	1.17377	0.00107781	0.027	363.421	311.036	0.855856	9.06542e-05		---	AW664311	---
243022_at	378.695	320.593	1.18123	0.018064	0	355.291	317.51	0.893662	0.0552719	#	---	BF509158	---
243029_at	395.306	632.728	0.624764	0.0300253	0.069	468.693	623.187	1.32963	0.128576	#	---	AL533967	---
243045_at	933.963	1099.68	0.849304	0.0308692	0.019	951.804	1055.47	1.10892	0.0944202	#	SMYD1	N75296	SET and MYND domain containing 1
243053_x_at	322.634	294.885	1.0941	0.0140321	0	312.31	290.873	0.931358	0.0291295		---	AW044603	---
243176_at	306.449	346.714	0.883866	0.0171731	0.007	307.296	314.506	1.02346	0.764048	#	ARL5	AI636016	ADP-ribosylation factor-like 5
243227_at	334.039	306.95	1.08825	0.020379	0.1	315.19	296.583	0.940965	0.0815095	#	---	AI203608	---
243285_at	400.416	377.39	1.06101	0.0362466	0.045	388.522	374.062	0.962781	0.207774	#	LOC283335	AI201723	hypothetical protein LOC283335
243292_at	848.919	695.056	1.22137	0.039771	0.023	819.596	698.958	0.852807	0.0695513	#	---	BF589994	Similar to RIKEN cDNA 1110035L05
243374_x_at	345.062	319.751	1.07916	0.0330951	0.02	330.435	310.558	0.939845	0.128055	#	---	AW452674	---
243377_at	708.1	633.26	1.11818	0.0414199	0.02	689.241	615.255	0.892655	0.0170888		---	AA521427	---
243411_at	453.724	649.479	0.698597	0.0251867	0.016	488.56	624.465	1.27817	0.0980903	#	---	AI424415	---
243429_at	455.433	500.83	0.909355	0.0171296	0	472.671	483.14	1.02215	0.453196	#	---	BE645588	---
243468_at	332.152	293.718	1.13086	0.0347287	0.028	326.411	298.715	0.915148	0.0323626		PATE	AI015955	expressed in prostate and testis
243638_at	317.798	294.029	1.08084	0.0393623	0.038	318.974	292.532	0.917103	0.0355926		---	AW137827	---
243669_s_at	525.819	464.173	1.13281	0.0131456	0.049	521.64	474.322	0.909289	0.13129	#	PRAP1	AA502331	proline-rich acidic protein 1
243682_at	465.95	418.049	1.11458	0.0204733	0.04	469.934	419.055	0.89173	0.0871359	#	---	AA721355	---
243776_at	311.428	372.662	0.835686	0.034065	0.031	326.535	342.827	1.0499	0.418343	#	---	AW139582	---
243842_at	667.903	1244.94	0.536495	0.00708142	0	768.445	1252.99	1.63055	0.0157996		---	BE463896	---
244043_at	363.803	324.628	1.12068	0.043255	0.016	351.498	308.988	0.879061	0.00124635		TFDP2	AI049624	Transcription factor Dp-2 (E2F dimerization partner 2)
244187_at	372.757	624.848	0.596555	0.0294839	0.024	451.714	631.208	1.39736	0.133122	#	---	AA053853	---
244317_at	457.071	389.904	1.17227	0.0141892	0.103	451.765	364.954	0.807841	0.0102271		FLJ31340	BF035563	hypothetical protein FLJ31340
244526_at	327.774	277.158	1.18263	0.0349078	0.016	291.733	274.451	0.940762	0.493278	#	RASGRP3	AW188004	RAS guanyl releasing protein 3 (calcium and DAG-regulated)
244538_at	453.032	392.699	1.15364	0.0128017	0	445.769	405.478	0.909615	0.0151481		FLJ40162	AL041441	FLJ40162 protein
244550_at	464.264	395.009	1.17533	0.0307733	0.062	412.166	408.986	0.992286	0.905395	#	---	AA552017	---
244563_at	286.828	427.225	0.671374	0.0403431	0.017	320.686	420.148	1.31015	0.11714	#	FLJ21924	BG026723	hypothetical protein FLJ21924
244591_x_at	315.817	289.873	1.0895	0.0245911	0.031	318.332	284.097	0.892453	0.00705391		---	W92483	---
244648_at	413.733	352.536	1.17359	0.000261925	0.062	395.257	338.956	0.857558	0.000206334		---	AA007283	---
244661_at	261.674	460.007	0.568848	0.0437281	0.004	307.494	423.621	1.37766	0.172879	#	---	AA946876	---
244687_at	338.245	383.317	0.882416	0.00258768	0.031	333.193	376.079	1.12871	0.000450972		---	AI632010	---
244711_at	688.175	626.433	1.09856	0.038437	0.091	658.218	599.505	0.910801	0.0535014	#	---	BF512863	---
244725_at	318.693	538.975	0.591295	0.0286114	0.04	369.055	512.888	1.38973	0.112332	#	DMRTA1	AI017682	DMRT-like family A1
244842_x_at	356.214	321.083	1.10941	0.0399382	0.044	336.814	319.706	0.949207	0.0779061	#	---	AA235663	---
33579_i_at	559.034	514.122	1.08736	0.0323669	0.058	548.955	503.945	0.918009	0.00670626		GALR3	Z97630	galanin receptor 3
35254_at	661.3	700.361	0.944227	0.0110758	0	684.976	697.979	1.01898	0.614536	#	FLN29	AB007447	FLN29 gene product
35617_at	606.997	549.373	1.10489	0.0426817	0.066	608.989	553.067	0.908171	0.020002		MAPK7	U29725	mitogen-activated protein kinase 7
35776_at	711.37	763.752	0.931415	0.0390719	0.087	725.672	755.133	1.0406	0.0535856	#	ITSN1	AF064243	intersectin 1 (SH3 domain protein)
37254_at	338.289	319.686	1.05819	0.0238289	0	324.987	312.345	0.9611	0.0630278	#	ZNF133	U09366	zinc finger protein 133 (clone pHZ-13)
37590_g_at	1535.85	1773.85	0.865829	0.00372083	0.073	1631.09	1798.49	1.10263	0.0488979		DKFZp547K1113	AL109698	Hypothetical protein DKFZp547K1113
38069_at	591.829	555.939	1.06456	0.00885031	0.032	585.532	549.386	0.938269	0.0246109		CLCN7	Z67743	chloride channel 7
38340_at	656.925	609.652	1.07754	0.0361645	0.109	664.061	606.485	0.913297	0.00741502		HIP1R	AB014555	huntingtin interacting protein-1-related
38892_at	314.201	365.76	0.859036	0.0483957	0.061	317.628	368.98	1.16167	0.0127986		KIAA0240	D87077	KIAA0240
38964_r_at	683.876	630.66	1.08438	0.0256006	0.058	634.594	621.102	0.978739	0.573888	#	WAS	U12707	Wiskott-Aldrich syndrome (eczema-thrombocytopenia)
39891_at	557.562	493.771	1.12919	0.0228031	0.056	566.952	502.679	0.886634	0.0133458		DKFZp547K1113	AI246730	Hypothetical protein DKFZp547K1113
40560_at	697.987	637.018	1.09571	0.0258751	0.052	682.36	621.189	0.910354	0.0300653		TBX2	U28049	T-box 2
41386_i_at	348.794	389.743	0.894932	0.0385148	0.029	373.626	389.639	1.04286	0.242148	#	JMJD3	AB002344	jumonji domain containing 3
43511_s_at	379.112	346.779	1.09324	0.0459683	0.049	363.046	348.274	0.959309	0.138733	#	---	AI201594	MRNA; cDNA DKFZp762M127 (from clone DKFZp762M127)
43544_at	724.4	583.632	1.24119	0.00886393	0.022	692.062	583.925	0.843747	0.00349275		THRAP5	AA314406	thyroid hormone receptor associated protein 5
47105_at	460.158	430.741	1.06829	0.0130157	0.039	449.447	419.679	0.933767	0.201304	#	FLJ20399	AA886893	hypothetical protein FLJ20399
52731_at	332.697	313.219	1.06219	0.0405568	0.05	325.617	315.614	0.969278	0.322156	#	FLJ20294	AI359466	hypothetical protein FLJ20294
52741_at	1477.24	1608.37	0.918469	0.0377066	0.084	1547.77	1557.79	1.00647	0.884448	#	FLJ40452	AI962879	hypothetical protein FLJ40452
52837_at	549.599	480.336	1.1442	0.0305932	0.038	550.669	481.147	0.873749	0.002219		KIAA1644	AL047020	KIAA1644 protein
55692_at	309.074	341.352	0.905442	0.000964575	0.045	338.212	399.191	1.1803	0.000157961		ELMO2	W22924	engulfment and cell motility 2 (ced-12 homolog, C. elegans)
56821_at	811.059	905.736	0.89547	0.0376421	0.061	824.994	883.812	1.07129	0.302706	#	FLJ10815	AI963454	amino acid transporter
57539_at	374.631	348.125	1.07614	0.0387732	0.051	369.966	354.27	0.957574	0.251299	#	KIAA1847	AA535065	KIAA1847
64408_s_at	461.977	407.349	1.13411	0.0214726	0.031	444.736	401.46	0.902691	0.00316994		CALML4	AW025529	calmodulin-like 4
65086_at	602.939	560.795	1.07515	0.00602971	0.06	599.391	551.583	0.920239	0.0111926		MGC3262	Z78349	hypothetical protein MGC3262
65770_at	939.717	860.515	1.09204	0.0294682	0.028	948.969	830.549	0.875212	0.000166185		RHOT2	AI186666	ras homolog gene family, member T2
90610_at	588.016	540.687	1.08754	0.0140592	0.034	594.721	530.555	0.892107	9.84255e-06		LRCH4	AI654857	leucine-rich repeats and calponin homology (CH) domain containing 4
