# Supplementary material for: Skeletal Muscle Mitochondrial Functions, Mitochondrial DNA Copy Numbers, and Gene Transcript Profiles in Type 2 Diabetic and Nondiabetic Subjects at Equal Levels of Low or High Insulin and Euglycemia
Source: Oxford University Press journal article supplement (doi:10.2337/db05-1230), 2006-11-28
Supplement: pg3309suppl1a.doc [file pg3309suppl1a.doc]

Table 1a-1. Gene groups that were significantly different and coordinately changed between T2D and non-diabetic subjects after 7 h of low-dose insulin infusion, and effect of 7 h high-dose insulin infusion

| **Gene Groups Higher Expressed in T2D Subjects after Low-Dose Insulin Infusion** | | | | | | |
| --- | --- | --- | --- | --- | --- | --- |
| **Inflammatory Response (Biological Process, *p* = 0.001)** | | | | | | |
|  |  | Low Insulin Infusion | | High Insulin Infusion | |  |
| Probe Set | Gene Symbol | Ctrl/T2D | *p* Values | Ctrl/T2D# | *p* Values | Gene Name |
| 221468_at | XCR1 | 0.914 | 0.033 | 0.944 | 0.028 | Chemokine (C motif) receptor 1 |
| 202239_at | PARP4 | 0.937 | 0.038 | 0.922 | 0.037 | Poly (ADP-ribose) polymerase family, member 4 |
| 221463_at | CCL24 | 0.862 | 0.009 | 0.900 | 0.025 | Chemokine (C-C motif) ligand 24 |
| **Immune Response (Biological Process, *p* = 0.002)** | | | | | | |
|  |  | Low Insulin Infusion | | High Insulin Infusion | |  |
| Probe Set | Gene Symbol | Ctrl/T2D | *p* Values | Ctrl/T2D | *p* Values | Gene Name |
| 221463_at | CCL24 | 0.862 | 0.009 | 0.900 | 0.025 | Chemokine (C-C motif) ligand 24 |
| 206087_x_at | HFE | 0.929 | 0.02 | 0.963 | 0.190* | Hemochromatosis |
| 213932_x_at | HLA-A | 0.817 | 0.024 | 0.854 | 0.145* | Major histocomplatibility complex, class I, A |
| 211799_x_at | HLA-A / HLA-C | 0.914 | 0.03 | 0.947 | 0.547* | Major histocomplatibility complex, class I, A/C |
| 211911_x_at | HLA-C / HLA-B | 0.873 | 0.041 | 0.857 | 0.328* | Major histocomplatibility complex, class I, C/B |
| 209828_s_at | IL16 | 1.463 | 0.038 | 1.304 | 0.079* | Interleukin-16 |
| 215946_x_at | IGLL1 | 0.914 | 0.011 | 0.927 | 0.073* | Immunoglobulin lambda-like polypeptide 1 |
| 210629_x_at | LST1 | 0.942 | 0.021 | 0.982 | 0.472* | Leukocyte specific transcript 1 |
| 203005_at | LTBR | 1.067 | 0.015 | 1.054 | 0.171* | Lymphotoxin beta receptor |
| 208037_s_at | MADCAM1 | 0.926 | 0.007 | 0.966 | 0.331* | Mucosal vascular addressin cell adhesion molecule 1 |
| 205905_s_at | MICA / MICB | 1.781 | 0.015 | 1.581 | 0.029 | MHC class I polypeptide-related sequence A/B |
| 214146_s_at | PPBP | 0.743 | 0.002 | 0.778 | 0.032 | Pro-platelet basic protein ligand 7 (chemokine C-X-C motif) |
| **Antigen Process (Biological Process, *p* = 0.002)** | | | | | | |
|  |  | Low Insulin Infusion | | High Insulin Infusion | |  |
| Probe Set | Gene Symbol | Ctrl/T2D | *p* Values | Ctrl/T2D | *p* Values | Gene Name |
| 206087_x_at | HFE | 0.929 | 0.02 | 0.963 | 0.190* | Hemochromatosis |
| 213932_x_at | HLA-A | 0.817 | 0.024 | 0.854 | 0.145* | Major histocomplatibility complex, class I, A |
| 211799_x_at | HLA-A / HLA-C | 0.914 | 0.03 | 0.947 | 0.547* | Major histocomplatibility complex, class I, A/C |
| 211911_x_at | HLA-C / HLA-B | 0.873 | 0.041 | 0.857 | 0.328* | Major histocomplatibility complex, class I, C/B |
| 211528_x_at | HLA-G | 0.872 | 0.012 | 0.904 | 0.234* | Histocompatibility antigen, class I, G |
| **Gene Groups Lower Expressed in T2D Subjects after Low-Dose Insulin Infusion** | | | | | | |
| **Mitochondrion (Cell Component, *p* = 0.001)** | | | | | | |
|  |  | Low Insulin Infusion | | High Insulin Infusion | |  |
| Probe Set | Gene Symbol | Ctrl/T2D | *p* Values | Ctrl/T2D | *p* Values | Gene Name |
| 235722_at | SYNJ2BP | 1.306 | 0.009 | 1.320 | 0.035 | Synaptojanin 2 binding protein |
| 235053_at | COX11 | 1.230 | 0.039 | 1.113 | 0.185* | COX11 homolog, cytochrome c oxidase assembly protein |
| 234452_at | HIBADH | 0.846 | 0.016 | 0.901 | 0.175* | 3-hydroxyisobutyrate dehydrogenase |
| 229426_at | COX5A | 1.085 | 0.046 | 1.070 | 0.166* | Cytochrome c oxidase subunit Va |
| 213736_at | COX5B | 0.838 | 0.001 | 0.924 | 0.199* | Cytochrome c oxidase subunit Vb |
| 228690_s_at | NDUFA11 | 1.079 | 0.039 | 1.095 | 0.070* | NADH dehydrogenase (ubiquinone) 1 alpha subcomplex, 11 |
| 227600_at | MRPS30 | 1.159 | 0.022 | 1.167 | 0.010 | Mitochondrial ribosomal protein S30 |
| 227560_at | SFXN2 | 0.878 | 0.016 | 0.828 | 0.000 | Sideroflexin 2 |
| 227417_at | FLJ20605 | 1.131 | 0.009 | 1.189 | 0.077* | Hypothetical protein FLJ20605 |
| 225477_s_at | MRPS25 | 1.149 | 0.027 | 1.236 | 0.016 | Mitochondrial ribosomal protein S25 |
| 225207_at | PDK4 | 0.080 | 0.014 | 0.396 | 0.377* | Pyruvate dehydrogenase kinase, isoenzyme 4 |
| 224333_s_at | MRPS5 | 1.098 | 0.025 | 1.096 | 0.002 | Mitochondrial ribosomal protein S5 |
| 223507_at | CLPX | 1.110 | 0.002 | 1.099 | 0.006 | ClpX caseinolytic protease X homolog |
| 222744_s_at | TMLHE | 1.083 | 0.011 | 1.063 | 0.117* | Trimethyllysine hydroxylase, epsilon |
| 222521_x_at | NDUFC2 | 0.907 | 0.02 | 0.924 | 0.044 | NADH dehydrogenase (ubiquinone) 1, subcomplex unknown, 2 |
| 221669_s_at | ACAD8 | 1.111 | 0.037 | 1.090 | 0.050 | Acyl-Coenzyme A dehydrogenase family, member 8 |
| 219827_at | UCP3 | 0.444 | 0.006 | 0.841 | 0.197* | Uncoupling protein 3 (mitochondrial, proton carrier) |
| 219350_s_at | DIABLO | 1.284 | 0.05 | 1.128 | 0.209* | Diablo homolog (Drosophila) |
| 218455_at | NFS1 | 1.081 | 0.044 | 1.067 | 0.115* | NFS1 nitrogen fixation 1 |
| 218226_s_at | NDUFB4 | 1.061 | 0.037 | 1.051 | 0.272* | NADH dehydrogenase (ubiquinone) 1 beta subcomplex, 4 |
| 218046_s_at | MRPS16 | 1.066 | 0.033 | 1.106 | 0.012 | Mitochondrial ribosomal protein S16 |
| 217942_at | MRPS35 | 1.120 | 0.036 | 1.145 | 0.029 | Mitochondrial ribosomal protein S35 |
| 217919_s_at | MRPL42 | 1.121 | 0.033 | 1.139 | 0.003 | Mitochondrial ribosomal protein L42 |
| 214045_at | LIAS | 1.150 | 0.000 | 1.178 | 0.018 | Lipoic acid synthetase |
| 213129_s_at | GCSH | 1.178 | 0.017 | 1.277 | 0.002 | Glycine cleavage system protein H (aminomethyl carrier) |
| 211971_s_at | LRPPRC | 1.142 | 0.035 | 1.165 | 0.019 | Leucine-rich PPR-motif containing |
| 211595_s_at | MRPS11 | 1.062 | 0.032 | 1.059 | 0.076* | Mitochondrial ribosomal protein S11 |
| 210453_x_at | ATP5L | 1.084 | 0.038 | 1.076 | 0.217* | ATP synthase, H+ transporting, mitochondrial F0 complex |
| 210386_s_at | MTX1 | 0.934 | 0.028 | 0.938 | 0.068* | Metaxin 1 |
| 209623_at | MCCC2 | 1.139 | 0.047 | 1.105 | 0.050 | Methylcrotonoyl-Coenzyme A carboxylase 2 (beta) |
| 208717_at | OXA1L | 1.118 | 0.029 | 1.180 | 0.005 | Oxidase (cytochrome c) assembly 1-like |
| 208652_at | PPP2CA | 1.158 | 0.002 | 1.181 | 0.007 | Protein phosphatase 2, catalytic subunit, alpha isoform |
| 208369_s_at | GCDH | 1.144 | 0.012 | 1.135 | 0.010 | Glutaryl-Coenzyme A dehydrogenase |
| 207098_s_at | MFN1 | 1.541 | 0.015 | 1.281 | 0.105* | Mitofusin 1 |
| 205633_s_at | ALAS1 | 1.283 | 0.005 | 1.173 | 0.089* | Aminolevulinate, delta-, synthase 1 |
| 205369_x_at | DBT | 1.095 | 0.024 | 1.073 | 0.043 | Dihydrolipoamide branched chain transacylase |
| 204290_s_at | ALDH6A1 | 1.396 | 0.002 | 1.409 | 0.001 | Aldehyde dehydrogenase 6 family, member A1 |
| 204263_s_at | CPT2 | 0.860 | 0.006 | 0.866 | 0.005 | Carnitine palmitoyltransferase II |
| 204067_at | SUOX | 1.180 | 0.001 | 1.110 | 0.045 | Sulfite oxidase |
| 203658_at | SLC25A20 | 0.869 | 0.024 | 0.891 | 0.118* | Solute carrier family 25, member 20 |
| 203633_at | CPT1A | 0.879 | 0.024 | 0.966 | 0.495* | Carnitine palmitoyltransferase 1A |
| 203609_s_at | ALDH5A1 | 1.148 | 0.028 | 1.164 | 0.039 | Aldehyde dehydrogenase 5 family, member A1 |
| 203199_s_at | MTRR | 1.179 | 0.014 | 1.110 | 0.013 | 5-methyltetrahydrofolate-homocysteine methyltransferase reductase |
| 202960_s_at | MUT | 1.207 | 0.002 | 1.209 | 0.001 | Methylmalonyl Coenzyme A mutase |
| 202675_at | SDHB | 1.162 | 0.011 | 1.173 | 0.021 | Succinate dehydrogenase complex, subunit B, iron sulfur |
| 202298_at | NDUFA1 | 1.058 | 0.044 | 1.045 | 0.391* | NADH dehydrogenase (ubiquinone) 1 alpha subcomplex, 1 |
| 200947_s_at | GLUD1 | 1.122 | 0.005 | 1.133 | 0.029 | Glutamate dehydrogenase 1 |
| 200691_s_at | HSPA9B | 1.117 | 0.005 | 1.114 | 0.052* | Heat shock 70kDa protein 9B (mortalin-2) |
| 200086_s_at | COX4I1 | 1.079 | 0.038 | 1.065 | 0.192* | Cytochrome c oxidase subunit IV isoform 1 |
| **Glucose Metabolism (Biological Process, *p* = 0.008)** | | | | | | |
|  |  | Low Insulin Infusion | | High Insulin Infusion | |  |
| Probe Set | Gene Symbol | Ctrl/T2D | *p* Values | Ctrl/T2D | *p* Values | Gene Name |
| 234452_at | HIBADH | 0.846 | 0.016 | 0.901 | 0.175* | 3-hydroxyisobutyrate dehydrogenase |
| 225207_at | PDK4 | 0.080 | 0.014 | 0.396 | 0.377* | Pyruvate dehydrogenase kinase, isoenzyme 4 |
| 209992_at | PFKFB2 | 1.305 | 0.006 | 1.139 | 0.163* | 6-phosphofructo-2-kinase/fructose-2,6-biphosphatase 2 |
| 202464_s_at | PFKFB3 | 0.332 | 0.018 | 1.277 | 0.079* | 6-phosphofructo-2-kinase/fructose-2,6-biphosphatase 3 |
| 201030_x_at | LDHB | 1.640 | 0.007 | 1.614 | 0.001 | Lactate dehydrogenase B |
| **Protein Transport (Biological Process, *p* = 0.009)** | | | | | | |
|  |  | Low Insulin Infusion | | High Insulin Infusion | |  |
| Probe Set | Gene Symbol | Ctrl/T2D | *p* Values | Ctrl/T2D | *p* Values | Gene Name |
| 225488_at | DERL1 | 0.929 | 0.039 | 0.947 | 0.185* | Der1-like domain family, member 1 |
| 224377_s_at | RAB18 | 1.057 | 0.042 | 1.060 | 0.066* | RAB18, member RAS oncogene family |
| 223507_at | CLPX | 1.110 | 0.002 | 1.099 | 0.006 | ClpX caseinolytic protease X homolog |
| 221274_s_at | LMAN2L | 1.117 | 0.002 | 1.051 | 0.082* | Lectin, mannose-binding 2-like |
| 217792_at | SNX5 | 1.093 | 0.033 | 1.068 | 0.053* | Sorting nexin 5 |
| 211960_s_at | RAB7 | 1.094 | 0.014 | 1.050 | 0.217* | RAB7, member RAS oncogene family |
| 210648_x_at | SNX3 | 1.079 | 0.028 | 1.090 | 0.060* | Sorting nexin 3 |
| 208975_s_at | KPNB1 | 1.083 | 0.045 | 1.079 | 0.192* | Karyopherin (importin) beta 1 |
| 203630_s_at | COG5 | 1.080 | 0.041 | 1.086 | 0.094* | Component of oligomeric golgi complex 5 |
| 201111_at | CSE1L | 1.243 | 0.021 | 1.236 | 0.025 | CSE1 chromosome segregation 1-like |
| 1558249_s_at | STX16 | 1.112 | 0.02 | 1.039 | 0.427* | Syntaxin 16 |
| **Regulation of Translation (Biological Process, *p* = 0.008)** | | | | | | |
|  |  | Low Insulin Infusion | | High Insulin Infusion | |  |
| Probe Set | Gene Symbol | Ctrl/T2D | *p* Values | Ctrl/T2D | *p* Values | Gene Name |
| 239288_at | TNIK | 1.146 | 0.015 | 1.172 | 0.023 | TRAF2 and NCK interacting kinase |
| 212130_x_at | SUI1 | 1.091 | 0.014 | 1.008 | 0.893* | Putative translation initiation factor |
| 209323_at | PRKRIR | 1.131 | 0.018 | 1.150 | 0.001 | Protein-kinase, interferon-inducible double stranded RNA dependent inhibitor, repressor of (P58 repressor) |
| 208652_at | PPP2CA | 1.158 | 0.002 | 1.181 | 0.007 | Protein phosphatase 2, catalytic subunit, alpha isoform |
| 205228_at | RBMS2 | 1.409 | 0.041 | 1.260 | 0.133* | RNA binding motif, single stranded interacting protein 2 |

# Ctrl: non-diabetic subjects; T2D: type 2 diabetic subjects; * compensated by high-dose insulin.

Table 1a-2. Electronic Transport Chain (ETC) Members That Were Higher Expressed in T2D Patients at Post-Absorptive Levels of Insulin

| Gene Symbol | Ctrl/T2D | *p* Values | Method of Measurement | Gene Name |
| --- | --- | --- | --- | --- |
| COX5B | 0.838 | 0.001 | Microarray | Cytochrome c oxidase subunit Vb |
| NDUFC2 | 0.907 | 0.02 | Microarray | NADH dehydrogenase (ubiquinone) 1, subcomplex unknown, 2 |
| COX5B | 0.613 | 0.07 | Real-time PCR | Cytochrome c oxidase subunit Vb |
| SD | 0.559 | 0.07 | Real-time PCR | Succinate dehydrogenase |
| COX3 | 0.518 | 0.05 | Real-time PCR | Cytochrome c oxidase subunit III |
| COX4 | 0.633 | 0.03 | Real-time PCR | Cytochrome c oxidase subunit IV |
| ND4 | 0.538 | 0.04 | Real-time PCR | NADH dehydrogenase 4 |
| COX1 | 0.393 | 0.0005 | Western Blot | Cytochrome c oxidase subunit I |
