# Supplementary material for: Skeletal Muscle Mitochondrial Functions, Mitochondrial DNA Copy Numbers, and Gene Transcript Profiles in Type 2 Diabetic and Nondiabetic Subjects at Equal Levels of Low or High Insulin and Euglycemia
Source: Oxford University Press journal article supplement (doi:10.2337/db05-1230), 2006-11-28
Supplement: pg3309suppl3.xls [file pg3309suppl3.xls]

## Sheet: Sheet1
Probe_set	lowIns-ND	highIns-ND	high/low -ND	p Values (NDs)	lowIns-T2D	highIns-T2D	high/low -T2D	p Values (T2D)	Gene_Symbol	AC_number	gene_full_name
1553253_at	577.803	542.686	0.9392	0.0066	604.941	592.802	0.9799	0.0469	ASB16	NM_080863	ankyrin repeat and SOCS box-containing 16
1553971_a_at	576.572	512.992	0.8897	0.0148	522.803	467.087	0.8934	0.0156	GATS	AL831967	opposite strand transcription unit to STAG3
1554661_s_at	361.455	323.898	0.8961	0.0151	344.954	326.518	0.9466	0.0023	FLJ32001	BC036200	hypothetical protein FLJ32001
1555997_s_at	612.645	810.585	1.3231	0.024	563.8	795.731	1.4114	0.0127	IGFBP5	BM128432	insulin-like growth factor binding protein 5
1563228_x_at	386.999	339.792	0.878	0.0456	372.241	357.475	0.9603	0.0457	MGC15523	BC020925	Hypothetical protein MGC15523
200638_s_at	575.065	733.163	1.2749	0.005	573.555	771.304	1.3448	0.019	YWHAZ	BC003623	tyrosine 3-monooxygenase/tryptophan 5-monooxygenase activation protein, zeta polypeptide
200639_s_at	1006.14	1149.55	1.1425	0.0023	958.217	1107.64	1.1559	0.0229	YWHAZ	NM_003406	tyrosine 3-monooxygenase/tryptophan 5-monooxygenase activation protein, zeta polypeptide
200640_at	810.07	931.07	1.1494	0	760.931	930.393	1.2227	0.0043	YWHAZ	NM_003406	tyrosine 3-monooxygenase/tryptophan 5-monooxygenase activation protein, zeta polypeptide
200693_at	609.716	716.356	1.1749	0.0034	572.061	652.322	1.1403	0.0197	YWHAQ	NM_006826	tyrosine 3-monooxygenase/tryptophan 5-monooxygenase activation protein, theta polypeptide
200698_at	476.044	524.412	1.1016	0.0413	443.581	531.759	1.1988	0.0456	KDELR2	AL542253	KDEL (Lys-Asp-Glu-Leu) endoplasmic reticulum protein retention receptor 2
200731_s_at	2882.06	2592.2	0.8994	0.0003	2820.04	2583.16	0.916	0.0244	PTP4A1	AW165960	protein tyrosine phosphatase type IVA, member 1
200745_s_at	661.667	720.464	1.0889	0.0063	644.597	698.268	1.0833	0.0209	GNB1	AF070603	guanine nucleotide binding protein (G protein), beta polypeptide 1
200797_s_at	1953.21	1724.31	0.8828	0.0011	2027.27	1690.63	0.8339	0.0037	MCL1	AI275690	myeloid cell leukemia sequence 1 (BCL2-related)
200886_s_at	750.365	855.303	1.1399	0.018	731.757	839.58	1.1473	0.0296	PGAM1	NM_002629	phosphoglycerate mutase 1 (brain)
200944_s_at	454.775	541.391	1.1905	0.0078	403.693	452.444	1.1208	0.0435	HMGN1	NM_004965	high-mobility group nucleosome binding domain 1
200998_s_at	386.662	431.928	1.1171	0.0029	380.293	407.744	1.0722	0.0069	CKAP4	AW029619	cytoskeleton-associated protein 4
200999_s_at	381.106	501.112	1.3149	0.0005	349.409	442.942	1.2677	0.0009	CKAP4	NM_006825	cytoskeleton-associated protein 4
201032_at	3359.96	4057.19	1.2075	0.0074	3015.07	3395.12	1.126	0.0435	BLCAP	NM_006698	bladder cancer associated protein
201087_at	738.116	801.965	1.0865	0.015	737.566	852.158	1.1554	0.0467	PXN	NM_002859	paxillin
201247_at	609.512	636.051	1.0435	0.0122	576.552	599.359	1.0396	0.0397	SREBF2	BE513151	sterol regulatory element binding transcription factor 2
201329_s_at	320.874	445.306	1.3878	0.002	289.478	353.45	1.221	0.014	ETS2	NM_005239	v-ets erythroblastosis virus E26 oncogene homolog 2 (avian)
201580_s_at	677.38	618.625	0.9133	0.0474	618.939	582.765	0.9416	0.0327	DJ971N18.2	AL544094	hypothetical protein DJ971N18.2
201656_at	420.704	462.387	1.0991	0.0041	389.59	428.603	1.1001	0.0169	ITGA6	NM_000210	integrin, alpha 6
201694_s_at	369.177	467.751	1.267	0.0069	365.169	416.959	1.1418	0.0024	EGR1	NM_001964	early growth response 1
201735_s_at	445.356	401.334	0.9012	0.0325	419.873	362.868	0.8642	0.0086	CLCN3	NM_001829	chloride channel 3
201989_s_at	419.118	400.929	0.9566	0.05	427.835	391.295	0.9146	0.0074	CREBL2	AL529409	cAMP responsive element binding protein-like 2
202160_at	657.904	601.434	0.9142	0.0112	655.209	543.997	0.8303	0.007	CREBBP	NM_004380	CREB binding protein (Rubinstein-Taybi syndrome)
202395_at	419.587	490.346	1.1686	0.0028	388.691	439.303	1.1302	0.0496	NSF	NM_006178	N-ethylmaleimide-sensitive factor
202548_s_at	704.663	780.722	1.1079	0.0038	695.482	754.964	1.0855	0.0056	ARHGEF7	NM_003899	Rho guanine nucleotide exchange factor (GEF) 7
202808_at	550.901	492.328	0.8937	0.0062	609.001	487.943	0.8012	0.0014	C10orf26	AK000161	chromosome 10 open reading frame 26
202887_s_at	800.105	619.014	0.7737	0.0387	990.154	634.76	0.6411	0.0092	DDIT4	NM_019058	DNA-damage-inducible transcript 4
203295_s_at	3822.49	3506.85	0.9174	0.0357	4076.87	3623.35	0.8888	0.0072	ATP1A2	AW440492	ATPase, Na+/K+ transporting, alpha 2 (+) polypeptide
203395_s_at	336.453	487.091	1.4477	0.0054	265.761	442.294	1.6643	0.0064	HES1	NM_005524	hairy and enhancer of split 1, (Drosophila)
203542_s_at	940.689	762.954	0.8111	0.0028	931.74	804.623	0.8636	0.0005	BTEB1	AI690205	basic transcription element binding protein 1
203543_s_at	1324.7	1042.73	0.7871	0.004	1205.38	1005.7	0.8343	0.0072	BTEB1	NM_001206	basic transcription element binding protein 1
203659_s_at	450.705	415.66	0.9222	0.0385	454.016	410.027	0.9031	0.0282	RFP2	NM_005798	ret finger protein 2
203986_at	2399.88	2693.05	1.1222	0.0023	2266.62	2679.03	1.1819	0.0094	GENX-3414	NM_003943	genethonin 1
204180_s_at	360.9	380.95	1.0556	0.0272	364.107	394.429	1.0833	0.0187	ZNF297B	AI745225	zinc finger protein 297B
204526_s_at	661.814	530.41	0.8014	0.0252	768.277	547.43	0.7125	0.0179	TBC1D8	NM_007063	TBC1 domain family, member 8 (with GRAM domain)
204568_at	482.075	440.227	0.9132	0.0179	488.047	431.594	0.8843	0.0049	KIAA0831	NM_014924	KIAA0831
204937_s_at	463.849	435.046	0.9379	0.0134	468.893	432.646	0.9227	0.0156	ZNF274	NM_016325	zinc finger protein 274
204984_at	395.477	448.586	1.1343	0.0115	394.006	488.81	1.2406	0.0468	GPC4	NM_001448	glypican 4
205002_at	1072.96	1214.14	1.1316	0.0005	1012.59	1108.99	1.0952	0.0331	DJ159A19.3	NM_015699	Hypothetical protein DJ159A19.3
205105_at	426.243	473.882	1.1118	0.0203	393.407	428.056	1.0881	0.0327	MAN2A1	NM_002372	mannosidase, alpha, class 2A, member 1
205176_s_at	320.103	293.829	0.9179	0.0282	355.42	322.911	0.9085	0.0483	ITGB3BP	NM_014288	integrin beta 3 binding protein (beta3-endonexin)
205738_s_at	1768.15	1535.46	0.8684	0.0469	2086.27	1740.09	0.8341	0.0163	FABP3	NM_004102	fatty acid binding protein 3, muscle and heart (mammary-derived growth inhibitor)
205883_at	1751.27	1227.07	0.7007	0.0358	2030.52	1454.03	0.7161	0.0103	ZBTB16	NM_006006	zinc finger and BTB domain containing 16
206031_s_at	1098.14	1018.51	0.9275	0.0436	1074.78	1135.26	1.0563	0.008	USP5	NM_003481	ubiquitin specific protease 5 (isopeptidase T)
206061_s_at	583.368	623.01	1.068	0.001	577.149	550.34	0.9535	0.0462	DICER1	NM_030621	Dicer1, Dcr-1 homolog (Drosophila)
206445_s_at	1873.76	2002.93	1.0689	0	1835.95	2095.9	1.1416	0.0433	HRMT1L2	NM_001536	HMT1 hnRNP methyltransferase-like 2 (S. cerevisiae)
206527_at	378.233	363.165	0.9602	0.0487	396.42	365.813	0.9228	0.0362	ABAT	NM_000663	4-aminobutyrate aminotransferase
207243_s_at	3493.6	4684.7	1.3409	0.0002	3460.86	4235.21	1.2237	0.0014	CALM2	NM_001743	calmodulin 2 (phosphorylase kinase, delta)
207318_s_at	530.692	564.511	1.0637	0.0488	532.649	509.151	0.9559	0.0266	CDC2L5	AJ297710	cell division cycle 2-like 5 (cholinesterase-related cell division controller)
208072_s_at	952.779	1099.83	1.1543	0.0013	905.38	1085.69	1.1992	0.0179	DGKD	NM_003648	diacylglycerol kinase, delta 130kDa
208325_s_at	344.549	313.783	0.9107	0.0013	345.336	316.768	0.9173	0.0152	AKAP13	NM_006738	A kinase (PRKA) anchor protein 13
209039_x_at	607.351	667.152	1.0985	0.0013	586.805	632.077	1.0771	0.0152	EHD1	AF001434	EH-domain containing 1
209184_s_at	363.868	303.841	0.835	0.0135	415.391	307.046	0.7392	0.0006	IRS2	BF700086	insulin receptor substrate 2
209253_at	821.701	760.564	0.9256	0.036	788.669	762.15	0.9664	0.0448	SCAM-1	AF037261	vinexin beta (SH3-containing adaptor molecule-1)
209479_at	371.462	346.068	0.9316	0.0251	390.952	342.595	0.8763	0.0063	C6orf80	BC000758	chromosome 6 open reading frame 80
209534_x_at	596.183	536.031	0.8991	0.0003	634.044	566.928	0.8941	0.0148	AKAP13	BF222823	A kinase (PRKA) anchor protein 13
209539_at	1785.46	1668.05	0.9342	0.013	1779.19	1719.18	0.9663	0.0285	ARHGEF6	D25304	Rac/Cdc42 guanine nucleotide exchange factor (GEF) 6
209563_x_at	5730.41	6435.14	1.123	0.0023	6051.21	6494.5	1.0733	0.0329	CALM1	BC000454	calmodulin 1 (phosphorylase kinase, delta)
209681_at	538.649	463.616	0.8607	0.0081	640.525	446.332	0.6968	0.0027	SLC19A2	AF153330	solute carrier family 19 (thiamine transporter), member 2
209782_s_at	369.494	409.769	1.109	0.0035	347.77	378.938	1.0896	0.0465	DBP	U79283	D site of albumin promoter (albumin D-box) binding protein
209784_s_at	504.381	573.707	1.1374	0.0311	465.572	541.952	1.1641	0.0268	JAG2	AF029778	jagged 2
209824_s_at	388.612	362.173	0.932	0.0428	374.063	340.234	0.9096	0.0113	ARNTL	AB000812	aryl hydrocarbon receptor nuclear translocator-like
210038_at	2002.36	1778.44	0.8882	0.0087	2070.26	1724.19	0.8328	0.0387	PRKCQ	AL137145	protein kinase C, theta
210039_s_at	1090.75	1015.7	0.9312	0.0342	1137.71	980.132	0.8615	0.0306	PRKCQ	L01087	protein kinase C, theta
210069_at	857.34	748.858	0.8735	0.0113	863.057	735.38	0.8521	0.0452	CHKB /// CPT1B	U62733	choline kinase beta /// carnitine palmitoyltransferase 1B (muscle)
210393_at	331.467	284.351	0.8579	0.0027	332.712	308.418	0.927	0.0062	GPR49	AF062006	G protein-coupled receptor 49
211475_s_at	1149.29	1055.99	0.9188	0.0195	1292.35	1202.09	0.9302	0.0087	BAG1	AF116273	BCL2-associated athanogene
211764_s_at	2133.06	1788.21	0.8383	0.0145	2208.09	1693.71	0.767	0.0062	UBE2D1	BC005980	ubiquitin-conjugating enzyme E2D 1 (UBC4/5 homolog, yeast) /// ubiquitin-conjugating enzyme E2D 1 (UBC4/5 homolog, yeast)
211959_at	6662.1	7711.95	1.1576	0.0254	7116.56	7840.7	1.1018	0.0237	IGFBP5	AW007532	insulin-like growth factor binding protein 5
211984_at	3786.28	4797.7	1.2671	0.0037	4039.88	4735.66	1.1722	0.0266	CALM1	AI653730	calmodulin 1 (phosphorylase kinase, delta)
211985_s_at	3550.74	4596.4	1.2945	0.0029	3726.28	4383.78	1.1764	0.0311	CALM1	AI653730	calmodulin 1 (phosphorylase kinase, delta)
211997_x_at	3155.14	3270.54	1.0366	0.0172	3227.32	3462.44	1.0729	0.0152	H3F3B	NM_005324	H3 histone, family 3B (H3.3B)
212370_x_at	520.245	490.856	0.9435	0.0058	505.301	474.53	0.9391	0.0222	LOC387680 /// FLJ10824	AL080183	similar to KIAA0592 protein /// hypothetical protein FLJ10824
212408_at	1602.15	1378.75	0.8606	0.0066	1622.34	1316.92	0.8117	0.0091	LAP1B	AK023204	lamina-associated polypeptide 1B
212409_s_at	602.143	552.736	0.9179	0.0412	598.149	548.738	0.9174	0.0085	LAP1B	AK021613	lamina-associated polypeptide 1B
212426_s_at	543.278	651.146	1.1986	0.0017	482.599	581.839	1.2056	0.0093	YWHAQ	BF033313	tyrosine 3-monooxygenase/tryptophan 5-monooxygenase activation protein, theta polypeptide
212461_at	794.38	980.373	1.2341	0.0004	733.68	877.973	1.1967	0.0063	---	BF793951	---
212636_at	1662.38	1841.44	1.1077	0.0403	1549.3	1684.39	1.0872	0.0473	QKI	AL031781	quaking homolog, KH domain RNA binding (mouse)
212810_s_at	391.112	420.176	1.0743	0.0038	374.938	398.322	1.0624	0.031	SLC1A4	W72527	solute carrier family 1 (glutamate/neutral amino acid transporter), member 4
213349_at	570.905	530.681	0.9295	0.0312	573.123	480.011	0.8375	0.0003	KIAA0779	AI934469	KIAA0779 protein
213351_s_at	623.201	569.552	0.9139	0.0103	587.453	491.411	0.8365	0.0081	KIAA0779	AB018322	KIAA0779 protein
213476_x_at	792.177	932.93	1.1777	0.0005	770.51	997.954	1.2952	0.0385	TUBB4	AL565749	tubulin, beta, 4
213524_s_at	7793.43	10211.6	1.3103	0.0002	7465.79	9621.38	1.2887	0.008	G0S2	NM_015714	putative lymphocyte G0/G1 switch gene
213688_at	975.34	1291.43	1.3241	0.0036	1032.17	1257.57	1.2184	0.035	CALM1	N25325	calmodulin 1 (phosphorylase kinase, delta)
213699_s_at	903.788	1101.21	1.2184	0.0014	848.506	962.212	1.134	0.0386	YWHAQ	AA854017	tyrosine 3-monooxygenase/tryptophan 5-monooxygenase activation protein, theta polypeptide
213880_at	436.89	231.777	0.5305	0.0032	396.774	252.959	0.6375	0.0017	GPR49	AL524520	G protein-coupled receptor 49
214141_x_at	568.587	689.556	1.2128	0.0004	512.872	630.31	1.229	0.012	SFRS7	BF033354	splicing factor, arginine/serine-rich 7, 35kDa
214285_at	989.299	860.346	0.8697	0.0201	1230.86	975.039	0.7922	0.0382	FABP3	AI041520	fatty acid binding protein 3, muscle and heart (mammary-derived growth inhibitor)
214590_s_at	1058.97	865.367	0.8172	0.0258	1171.76	842.971	0.7194	0.0083	UBE2D1	AL545760	ubiquitin-conjugating enzyme E2D 1 (UBC4/5 homolog, yeast)
214724_at	536.838	520.573	0.9697	0.0338	551.42	492.656	0.8934	0.0362	DIXDC1	AF070621	DIX domain containing 1
214948_s_at	341.517	389.489	1.1405	0.013	317.171	336.013	1.0594	0.045	TMF1	AL050136	TATA element modulatory factor 1 /// Similar to family with sequence similarity 9, member C
215436_at	566.148	515.103	0.9098	0.0424	515.681	445.781	0.8645	0.011	---	AK023959	---
215711_s_at	384.01	361.835	0.9423	0.0236	381.537	366.763	0.9613	0.0105	WEE1	AJ277546	WEE1 homolog (S. pombe)
216515_x_at	882.495	1025.42	1.162	0.0192	796.751	923.584	1.1592	0.0283	PTMA	AL121585	prothymosin, alpha (gene sequence 28)
217115_at	431.225	404.113	0.9371	0.0025	448.677	429.091	0.9563	0.0319	---	AL031686	---
217952_x_at	427.359	390.109	0.9128	0.0204	443.956	370.341	0.8342	0.0015	PHF3	BF430956	PHD finger protein 3
217954_s_at	502.123	447.926	0.8921	0.0398	481.731	372.517	0.7733	0.0014	PHF3	NM_015153	PHD finger protein 3
218047_at	670.504	594.111	0.8861	0.0058	694.324	562.448	0.8101	0.0131	OSBPL9	NM_024586	oxysterol binding protein-like 9
218072_at	591.637	552.5	0.9338	0.0222	587.243	548.284	0.9337	0.0068	COMMD9	NM_014186	COMM domain containing 9
218087_s_at	2364.61	1967.79	0.8322	0.018	2100.72	1865.81	0.8882	0.0077	SORBS1	NM_015385	sorbin and SH3 domain containing 1
218099_at	934.906	1094.83	1.1711	0.0166	852.823	1027.83	1.2052	0.0059	HT008	NM_018469	uncharacterized hypothalamus protein HT008
218204_s_at	3418.7	2982.61	0.8724	0.0258	3193.9	2839.94	0.8892	0.0344	FYCO1	NM_024513	FYVE and coiled-coil domain containing 1
218284_at	840.819	882.013	1.049	0.003	822.77	891.85	1.084	0.0129	SMAD3	NM_015400	SMAD, mothers against DPP homolog 3 (Drosophila)
218532_s_at	1863.69	1487.25	0.798	0.0217	1870.19	1372.94	0.7341	0.0084	FLJ20152	NM_019000	hypothetical protein FLJ20152
218751_s_at	553.623	520.639	0.9404	0.0033	608.115	520.294	0.8556	0.0049	FBXW7	NM_018315	F-box and WD-40 domain protein 7 (archipelago homolog, Drosophila)
219259_at	528.758	506.073	0.9571	0.0268	553.349	528.972	0.9559	0.0205	SEMA4A	NM_022367	sema domain, immunoglobulin domain (Ig), transmembrane domain (TM) and short cytoplasmic domain, (semaphorin) 4A
219485_s_at	468.274	546.532	1.1671	0.0002	435.371	466.264	1.071	0.0246	PSMD10	NM_002814	proteasome (prosome, macropain) 26S subunit, non-ATPase, 10
219949_at	2697.81	2383.21	0.8834	0.022	2597.34	2090.58	0.8049	0.0065	LRRC2	NM_024512	leucine rich repeat containing 2
221718_s_at	966.984	820.751	0.8488	0.0075	961.885	852.214	0.886	0.0138	AKAP13	M90360	A kinase (PRKA) anchor protein 13 /// A kinase (PRKA) anchor protein 13
221985_at	604.38	520.522	0.8612	0.0094	661.821	501.43	0.7577	0.006	DRE1	AW006750	DRE1 protein
221986_s_at	357.9	298.505	0.834	0.01	372.795	277.12	0.7434	0.0033	DRE1	AW006750	DRE1 protein
222024_s_at	622.514	538.355	0.8648	0.0002	656.05	533.115	0.8126	0.0076	AKAP13	AK022014	A kinase (PRKA) anchor protein 13
222221_x_at	448.999	486.274	1.083	0.0313	438.256	473.349	1.0801	0.0082	EHD1	AY007161	EH-domain containing 1
222426_at	337.991	354.667	1.0493	0.04	350.362	368.693	1.0523	0.0025	MAPKAP1	BG499947	mitogen-activated protein kinase associated protein 1
222513_s_at	2405.14	2024.39	0.8417	0.0106	2209.6	2020.99	0.9146	0.0252	SORBS1	N21458	sorbin and SH3 domain containing 1
222729_at	437.94	417.331	0.9529	0.0315	468.897	412.197	0.8791	0.0242	FBXW7	BE551877	F-box and WD-40 domain protein 7 (archipelago homolog, Drosophila)
222732_at	491.893	440.964	0.8965	0.0405	558.084	508.809	0.9117	0.019	TRIM39	BF514859	tripartite motif-containing 39
223007_s_at	1041.39	978.364	0.9395	0.0413	1064.43	912.154	0.8569	0.0252	C9orf5	AA495988	chromosome 9 open reading frame 5
223249_at	416.598	363.924	0.8736	0.0147	384.905	348.054	0.9043	0.0366	CLDN12	AL136770	claudin 12
223387_at	558.834	520.98	0.9323	0.0114	588.499	528.736	0.8984	0.0003	ZFYVE1	AB046809	zinc finger, FYVE domain containing 1
224318_s_at	1210.65	1080.41	0.8924	0.0002	1220.16	1142.05	0.936	0.0178	FLJ10081	AF311326	hypothetical protein FLJ10081
224445_s_at	545.579	597.291	1.0948	0.0091	500.959	554.722	1.1073	0.0019	ZFYVE21	BC005999	zinc finger, FYVE domain containing 21 /// zinc finger, FYVE domain containing 21
224602_at	1648.88	1806.35	1.0955	0.0256	1554.27	1659.86	1.0679	0.031	LOC401152	BF244081	HCV F-transactivated protein 1
224609_at	640.913	693.46	1.082	0.0333	650.171	729.483	1.122	0.005	CTL2	AI264216	CTL2 gene
224669_at	481.05	437.924	0.9104	0.0089	499.911	467.697	0.9356	0.0006	C20orf35	AI096624	chromosome 20 open reading frame 35
224777_s_at	468.411	542.168	1.1575	0.0021	429.42	472.243	1.0997	0.0129	PAFAH1B2	BG386322	platelet-activating factor acetylhydrolase, isoform Ib, beta subunit 30kDa
224884_at	484.49	402.449	0.8307	0.0002	528.26	418.559	0.7923	0.0012	AKAP13	AW575773	A kinase (PRKA) anchor protein 13
225005_at	313.564	356.611	1.1373	0.0002	303.014	327.584	1.0811	0.0264	PHF13	AL039384	PHD finger protein 13
225327_at	620.332	527.403	0.8502	0.0267	713.288	534.349	0.7491	0.0031	FLJ10980	AB037791	hypothetical protein FLJ10980
225345_s_at	1301.52	1096.46	0.8424	0.0094	1639.97	1194.53	0.7284	0.002	FBXO32	AU155376	F-box protein 32
225390_s_at	756.269	922.25	1.2195	0.0181	635.822	808.07	1.2709	0.0147	KLF13	AL390127	Kruppel-like factor 13
225458_at	328.485	309.823	0.9432	0.0041	333.346	309.483	0.9284	0.0444	DKFZP564I1171	BF528646	DKFZP564I1171 protein
225550_at	656.536	603.583	0.9193	0.0117	685.249	607.69	0.8868	0.0268	FLJ32001	AV700816	hypothetical protein FLJ32001
225712_at	367.066	352.395	0.96	0.0097	356.752	331.781	0.93	0.0392	---	AW024563	---
225827_at	374.578	425.693	1.1365	0.0049	335.513	383.81	1.1439	0.0343	EIF2C2	AI832074	eukaryotic translation initiation factor 2C, 2
225838_at	340.87	319.438	0.9371	0.0369	341.53	305.566	0.8947	0.0155	EPC2	AK002010	enhancer of polycomb homolog 2 (Drosophila)
225893_at	410.898	373.61	0.9093	0.0341	407.176	330.691	0.8122	0.0112	---	AL589593	MRNA; cDNA DKFZp686D04119 (from clone DKFZp686D04119)
225957_at	347.346	308.474	0.8881	0.0012	329.922	289.39	0.8771	0.0076	LOC153222	AI307750	adult retina protein
225982_at	414.237	424.483	1.0247	0.0184	413.967	428.826	1.0359	0.0348	---	BG341575	---
225998_at	377.287	331.8	0.8794	0.003	384.815	316.827	0.8233	0.0009	GAB1	AK022142	GRB2-associated binding protein 1
226158_at	974.879	794.702	0.8152	0.0129	1071.19	742.655	0.6933	0.0053	LOC339924	AL120021	hypothetical protein LOC339924
226267_at	420.139	518.206	1.2334	0.0008	378.605	431.917	1.1408	0.0154	JDP2	AA716425	jun dimerization protein 2
226275_at	356.664	330.348	0.9262	0.0322	363.769	347.269	0.9546	0.0214	MAD	AI188653	MAX dimerization protein 1
226530_at	350.118	335.227	0.9575	0.023	350.666	340.919	0.9722	0.0171	BMF	AK024472	Bcl2 modifying factor
226734_at	335.719	356.703	1.0625	0.0405	366.473	402.397	1.098	0.0222	EIF4EL3	AW242220	Eukaryotic translation initiation factor 4E-like 3
226748_at	544.295	626.592	1.1512	0.008	484.51	534.705	1.1036	0.0201	MGC35274	AI674731	hypothetical protein MGC35274
226902_at	3278.64	3092.31	0.9432	0.04	3001.15	2800.91	0.9333	0.0085	USP13	BF109140	Ubiquitin specific protease 13 (isopeptidase T-3)
227321_at	694.383	611.078	0.88	0.0088	793.764	686.925	0.8654	0.0036	GATS	D52585	Opposite strand transcription unit to STAG3
227436_at	446.005	419.976	0.9416	0.0425	474.501	440.182	0.9277	0.0187	ZA20D1	BG291552	Zinc finger, A20 domain containing 1
227762_at	1435.07	1028.32	0.7166	0.0401	1590.54	1156.64	0.7272	0.0171	---	AW244016	---
227834_at	3134.59	2804.79	0.8948	0.0097	3079.21	2606.68	0.8465	0.0099	C6orf198	AL589605	Chromosome 6 open reading frame 198
228768_at	428.874	396.845	0.9253	0.0044	455.679	377.009	0.8274	0.0092	KIAA1961	N51056	KIAA1961 protein
228854_at	2450.93	1681.08	0.6859	0.0171	2720.26	1932.63	0.7105	0.0064	---	AI492388	---
229022_at	447.176	414.236	0.9263	0.0013	470.26	410.672	0.8733	0.016	---	AI745209	---
229052_at	6660.91	6219.17	0.9337	0.003	6858.01	6506.6	0.9488	0.0144	ANKRD23	AI637712	ankyrin repeat domain 23
229337_at	1021.09	1144.91	1.1213	0.0362	936.423	1100.3	1.175	0.0104	USP2	AW274034	ubiquitin specific protease 2
229703_at	387.473	361.881	0.934	0.0265	410.772	376.76	0.9172	0.0226	---	AA279428	---
229830_at	526.558	665.275	1.2634	0.0258	436.085	605.469	1.3884	0.0226	---	AW205919	---
230083_at	742.627	629.316	0.8474	0.0198	827.049	594.649	0.719	0.0027	USP53	AW188464	Ubiquitin specific protease 53
230367_at	3162	2515.92	0.7957	0.0113	3085.42	2594.37	0.8408	0.0026	CHASM	AI359511	Likely ortholog of mouse calponin homology-associated smooth muscle protein
231781_s_at	2175.03	1870.58	0.86	0.0102	1994.23	1578.41	0.7915	0.0059	LRRC2	AK021919	leucine rich repeat containing 2
231817_at	603.29	516.33	0.8559	0.0142	630.212	475.642	0.7547	0.0023	USP53	H25097	ubiquitin specific protease 53
231942_at	317.795	284.524	0.8953	0.0149	329.332	301.862	0.9166	0.0479	LOC284591	AL537261	Hypothetical protein LOC284591
232001_at	611.559	525.42	0.8591	0.0199	648.409	507.041	0.782	0.0132	---	AW193600	Hypothetical gene supported by AY007155
232667_at	364.248	448.982	1.2326	0.0022	341.825	424.541	1.242	0.023	---	AK023752	Transcribed locus, moderately similar to NP_078841.2 hypothetical protein FLJ14166 [Homo sapiens]
232761_at	566.605	650.787	1.1486	0.023	576.711	625.723	1.085	0.0172	COX4I2	AL117381	cytochrome c oxidase subunit IV isoform 2 (lung)
235085_at	382.967	413.49	1.0797	0.0431	393.562	440.399	1.119	0.0007	DKFZp761P0423	BF739767	Hypothetical protein DKFZp761P0423
235474_at	462.151	415.636	0.8994	0.0081	487.534	440.19	0.9029	0.0032	---	AI241810	---
237981_at	5833.61	5204.13	0.8921	0.0356	5855.63	5515.94	0.942	0.0473	CMYA5	AA195941	cardiomyopathy associated 5
239057_at	5332.28	4731.1	0.8873	0.0183	5688.56	4636.67	0.8151	0.0081	LMOD2	BF438844	leiomodin 2 (cardiac)
239657_x_at	383.452	423.491	1.1044	0.012	349.596	376.858	1.078	0.0237	---	AI341823	---
240139_at	318.713	292.755	0.9186	0.0123	323.463	313.36	0.9688	0.0084	---	AI949690	---
240803_at	311.923	290.964	0.9328	0.0205	320.627	303.1	0.9453	0.0179	---	AW450626	---
241368_at	998.484	874.138	0.8755	0.0413	845.507	749.974	0.887	0.0124	---	AI190693	---
242911_at	355.381	330.41	0.9297	0.0048	394.148	362.165	0.9189	0.0095	THRAP2	AW999644	thyroid hormone receptor associated protein 2
243300_at	365.275	321.855	0.8811	0.0056	393.374	360.783	0.9172	0	---	BF509191	---
243917_at	459.494	439.364	0.9562	0.0202	488.202	443.849	0.9091	0.0314	CLIC5	AW083491	Chloride intracellular channel 5
32032_at	458.622	427.685	0.9325	0.0493	473.503	447.48	0.945	0.0104	DGCR14	L77566	DiGeorge syndrome critical region gene 14
35156_at	620.905	584.036	0.9406	0.0022	644.058	611.913	0.9501	0.0162	LOC203069	AL050297	Hypothetical protein LOC203069
