# Supplementary material for: Skeletal Muscle Mitochondrial Functions, Mitochondrial DNA Copy Numbers, and Gene Transcript Profiles in Type 2 Diabetic and Nondiabetic Subjects at Equal Levels of Low or High Insulin and Euglycemia
Source: Oxford University Press journal article supplement (doi:10.2337/db05-1230), 2006-11-28
Supplement: pg3309suppl4.xls [file pg3309suppl4.xls]

## Sheet: test.txt-formated
Probe_set	low-ND	High-ND	high/low-ND	T-test	Gene_Symbol	AC_number	gene_full_name
219449_s_at	2462.17	4343.64	1.76415	0.00149095	FLJ20533	NM_017866	hypothetical protein FLJ20533
212240_s_at	1160.9	1974.32	1.70067	0.00385778	PIK3R1	AI679268	phosphoinositide-3-kinase, regulatory subunit 1 (p85 alpha)
212249_at	416.379	693.649	1.66591	0.0040194	PIK3R1	AI934473	phosphoinositide-3-kinase, regulatory subunit 1 (p85 alpha)
228057_at	2950.14	4836.36	1.63936	1.64e-05	DDIT4L	AA528140	DNA-damage-inducible transcript 4-like
231179_at	1055.35	1571.85	1.4894	0.000602171	---	R99291	---
202308_at	500.654	732.347	1.46278	0.00338349	SREBF1	NM_004176	sterol regulatory element binding transcription factor 1
211161_s_at	469.336	676.634	1.44168	0.0295271	COL3A1	AF130082	collagen, type III, alpha 1 (Ehlers-Danlos syndrome type IV, autosomal dominant)
238763_at	373.206	537.937	1.4414	0.00350371	RBM20	AI539118	RNA binding motif protein 20
231935_at	703.576	1011.98	1.43833	0.0014958	ARPP-21	AL133109	cyclic AMP-regulated phosphoprotein, 21 kD
201170_s_at	1711.58	2459.62	1.43705	0.00119659	BHLHB2	NM_003670	basic helix-loop-helix domain containing, class B, 2
228523_at	732.874	1029.26	1.40441	0.00475114	NANOS1	AW970089	nanos homolog 1 (Drosophila)
225283_at	289.672	404.506	1.39643	0.00229023	ARRDC4	AV701177	arrestin domain containing 4
201772_at	510.467	708.893	1.38872	4.24e-05	OAZIN	NM_015878	ornithine decarboxylase antizyme inhibitor
203394_s_at	564.522	774.516	1.37198	0.00179533	HES1	BE973687	hairy and enhancer of split 1, (Drosophila)
223805_at	828.964	1130.58	1.36384	0.0443814	OSBPL6	AF323728	oxysterol binding protein-like 6
228813_at	960.167	1286.23	1.33959	0.0303267	HDAC4	AW206037	histone deacetylase 4
219448_at	664.62	888.068	1.3362	0.0491629	FLJ20533	BC002748	hypothetical protein FLJ20533
209276_s_at	623.798	832.849	1.33513	0.00314744	GLRX	AF162769	glutaredoxin (thioltransferase)
202393_s_at	953.221	1267.51	1.32971	0.00796051	TIEG	NM_005655	TGFB inducible early growth response
228108_at	283.79	372.909	1.31403	0.00399844	---	AW274846	CDNA clone IMAGE:5263177, partial cds
213005_s_at	613.954	802.107	1.30646	4.34e-05	ANKRD15	D79994	ankyrin repeat domain 15
211958_at	1705.84	2228.28	1.30626	0.0142726	IGFBP5	R73554	insulin-like growth factor binding protein 5
211962_s_at	621.03	807.035	1.29951	0.0363304	ZFP36L1	BG250310	zinc finger protein 36, C3H type-like 1
224829_at	701.991	897.132	1.27798	0.00326866	CPEB4	AA772278	cytoplasmic polyadenylation element binding protein 4
225820_at	375.158	476.959	1.27135	0.000267364	---	AV646599	---
208226_x_at	426.616	537.749	1.2605	0.00214652	ADAM22	NM_004194	a disintegrin and metalloproteinase domain 22
206662_at	1191.12	1499.62	1.259	0.00626456	GLRX	NM_002064	glutaredoxin (thioltransferase)
232181_at	337.61	425.016	1.2589	0.0163324	LOC153346	AU157049	hypothetical protein LOC153346
226083_at	466.261	586.798	1.25852	0.0201507	---	AA886902	---
244623_at	1006.08	1262.54	1.2549	0.00264175	---	BF513800	---
201169_s_at	350.416	439.048	1.25293	0.0119194	BHLHB2	BG326045	basic helix-loop-helix domain containing, class B, 2
204011_at	562.568	704.732	1.25271	0.00277293	SPRY2	NM_005842	sprouty homolog 2 (Drosophila)
224831_at	954.268	1193.27	1.25046	0.0178062	CPEB4	BE620832	cytoplasmic polyadenylation element binding protein 4
210512_s_at	1094.1	1367.62	1.25	0.0254956	VEGF	AF022375	vascular endothelial growth factor
202674_s_at	515.122	643.885	1.24997	0.0463605	LMO7	NM_005358	LIM domain 7
209829_at	328.13	409.753	1.24875	0.0333316	C6orf32	AB002384	chromosome 6 open reading frame 32
228065_at	463.545	578.6	1.24821	0.00299985	BCL9L	AL353962	B-cell CLL/lymphoma 9-like
230090_at	315.254	393.36	1.24775	0.0304043	---	AW296078	Homo sapiens, clone IMAGE:4179986, mRNA, partial cds
209211_at	290.774	362.421	1.2464	0.0202338	KLF5	AF132818	Kruppel-like factor 5 (intestinal)
218736_s_at	1020.98	1272.37	1.24622	0.00301806	PALMD	NM_017734	palmdelphin
225816_at	322.639	401.476	1.24435	5.51e-05	---	AW138134	---
208227_x_at	439.199	545.988	1.24315	0.00223469	ADAM22	NM_021721	a disintegrin and metalloproteinase domain 22
41037_at	603.213	749.819	1.24304	0.000171857	TEAD4	U63824	TEA domain family member 4
228121_at	294.043	365.283	1.24228	0.003052	TGFB2	AU145950	Transforming growth factor, beta 2
200887_s_at	733.317	910.873	1.24213	0.041603	STAT1	NM_007315	signal transducer and activator of transcription 1, 91kDa
208977_x_at	1098.76	1363.32	1.24078	0.000697608	TUBB2	BC004188	tubulin, beta, 2
222996_s_at	1682.84	2086.78	1.24003	0.00108487	CXXC5	BC002490	CXXC finger 5
213726_x_at	1052.66	1302.71	1.23754	0.00220791	TUBB2	AA515698	tubulin, beta, 2
229644_at	418.676	516.985	1.23481	0.0497738	---	AA534420	---
1552670_a_at	1237.89	1527.4	1.23387	0.0360081	LOC286044	NM_024607	hypothetical protein LOC286044
236352_at	1137.55	1401.39	1.23193	0.00136414	VGLL2	AI276196	vestigial like 2 (Drosophila)
222662_at	2819.68	3445.82	1.22206	0.00454708	LOC286044	W60806	hypothetical protein LOC286044
202973_x_at	356.741	435.952	1.22204	0.00150264	FAM13A1	NM_014883	family with sequence similarity 13, member A1
224516_s_at	2413.05	2948.12	1.22174	0.00275911	CXXC5	BC006428	CXXC finger 5 /// CXXC finger 5
204141_at	275.272	336.262	1.22156	0.0478078	TUBB	NM_001069	tubulin, beta polypeptide
226682_at	1052.83	1284.23	1.21979	0.0127193	LOC283666	AW006185	hypothetical protein LOC283666
224894_at	1005.16	1224.32	1.21804	0.0229181	YAP1	BF247906	Yes-associated protein 1, 65kDa
208672_s_at	1134.04	1376.85	1.21412	0.00680593	SFRS3	BC000914	splicing factor, arginine/serine-rich 3
222572_at	1700.6	2060.81	1.21181	0.0416066	PPM2C	BG542521	protein phosphatase 2C, magnesium-dependent, catalytic subunit
229670_at	930.849	1127.85	1.21164	0.0143301	---	BF056369	---
203828_s_at	1172.08	1418.45	1.2102	0.00822173	NK4	NM_004221	natural killer cell transcript 4 /// natural killer cell transcript 4
213262_at	439.647	531.28	1.20842	0.000945617	SACS	AI932370	spastic ataxia of Charlevoix-Saguenay (sacsin)
211787_s_at	1032.56	1245.95	1.20665	0.00777816	EIF4A1	BC006210	eukaryotic translation initiation factor 4A, isoform 1 /// eukaryotic translation initiation factor 4A, isoform 1
200655_s_at	3522.97	4241.24	1.20388	0.000729535	CALM1	NM_006888	calmodulin 1 (phosphorylase kinase, delta)
204359_at	623.387	749.888	1.20292	0.0139373	FLRT2	NM_013231	fibronectin leucine rich transmembrane protein 2
200790_at	1139.83	1370.44	1.20232	0.00103549	ODC1	NM_002539	ornithine decarboxylase 1
200653_s_at	4122.85	4953.94	1.20158	0.00132923	CALM1	M27319	calmodulin 1 (phosphorylase kinase, delta)
1554978_at	293.202	352.269	1.20145	0.0477207	---	BC022082	Similar to GLP_127_1018_380
224895_at	977.068	1173.87	1.20142	0.0266395	YAP1	AA557632	Yes-associated protein 1, 65kDa
225450_at	1125.6	1351.56	1.20075	0.0259763	AMOTL1	AI433831	angiomotin like 1
208775_at	1119.02	1343.4	1.20051	0.00102592	XPO1	D89729	exportin 1 (CRM1 homolog, yeast)
218273_s_at	1061.48	1274.25	1.20044	0.0199058	PPM2C	NM_018444	protein phosphatase 2C, magnesium-dependent, catalytic subunit
224828_at	476.996	572.392	1.19999	0.00119487	CPEB4	AV704132	cytoplasmic polyadenylation element binding protein 4
233955_x_at	2040.32	2448.2	1.19991	0.00126227	CXXC5	AK001782	CXXC finger 5
201218_at	295.692	354.2	1.19787	0.000816026	CTBP2	N23018	C-terminal binding protein 2
200603_at	2690.19	3221.45	1.19748	0.0354503	PRKAR1A	AL050038	protein kinase, cAMP-dependent, regulatory, type I, alpha (tissue specific extinguisher 1)
209026_x_at	1438.76	1722.65	1.19732	0.0093627	OK/SW-cl.56	AF141349	beta 5-tubulin
201041_s_at	672.229	804.741	1.19712	0.0441559	DUSP1	NM_004417	dual specificity phosphatase 1
212187_x_at	2008.96	2404.74	1.19701	0.0435468	PTGDS	NM_000954	prostaglandin D2 synthase 21kDa (brain)
223344_s_at	449.341	536.974	1.19503	0.0361692	MS4A7	AB026043	membrane-spanning 4-domains, subfamily A, member 7
218640_s_at	283.106	338.169	1.1945	9.44e-05	PLEKHF2	NM_024613	pleckstrin homology domain containing, family F (with FYVE domain) member 2
216323_x_at	774.148	923.369	1.19275	0.00320716	---	K03460	---
210527_x_at	873.404	1041.71	1.1927	0.00203418	TUBA2	L11645	tubulin, alpha 2
222976_s_at	765.325	912.799	1.1927	0.0346972	TPM3	BC000771	tropomyosin 3
213158_at	1008.72	1203.04	1.19264	0.010062	---	AA045174	Homo sapiens, clone IMAGE:4214654, mRNA
213156_at	927.057	1105.52	1.19251	0.0168258	---	BG251521	Homo sapiens, clone IMAGE:4214654, mRNA
200772_x_at	1024.83	1219.45	1.18991	0.026441	PTMA	BF686442	prothymosin, alpha (gene sequence 28)
200751_s_at	815.312	969.971	1.18969	0.00464456	HNRPC	BE898861	heterogeneous nuclear ribonucleoprotein C (C1/C2)
232125_at	351.266	417.632	1.18893	0.0276913	---	AU147419	CDNA FLJ34585 fis, clone KIDNE2008758
208718_at	1899.47	2256.72	1.18808	0.000297067	DDX17	Z97056	DEAD (Asp-Glu-Ala-Asp) box polypeptide 17
224657_at	303.732	360.682	1.1875	0.0421293	MIG-6	AL034417	mitogen-inducible gene 6
235503_at	2957.27	3510.74	1.18716	0.00634008	ASB5	BF589787	ankyrin repeat and SOCS box-containing 5
211714_x_at	1549.91	1837.31	1.18543	0.00759924	OK/SW-cl.56	BC005838	beta 5-tubulin /// beta 5-tubulin
207425_s_at	514.372	609.665	1.18526	0.00403685	MSF	NM_006640	MLL septin-like fusion
235146_at	292.901	346.841	1.18416	0.00279374	---	N51717	---
201530_x_at	1255.79	1485.41	1.18285	0.0122645	EIF4A1	NM_001416	eukaryotic translation initiation factor 4A, isoform 1
223474_at	1390.21	1642.48	1.18147	0.0151796	C14orf4	AI932310	chromosome 14 open reading frame 4
209355_s_at	370.434	437.584	1.18127	0.00263271	PPAP2B	AB000889	phosphatidic acid phosphatase type 2B
225527_at	799.702	943.231	1.17948	0.00297282	CEBPG	BE622659	CCAAT/enhancer binding protein (C/EBP), gamma
227121_at	911.521	1074.93	1.17927	0.0120469	---	BF476076	MRNA; cDNA DKFZp586K1922 (from clone DKFZp586K1922)
225447_at	642.492	756.407	1.1773	0.00520294	GPD2	AA613031	Glycerol-3-phosphate dehydrogenase 2 (mitochondrial)
209205_s_at	1063.99	1252.34	1.17703	0.00542573	LMO4	BC003600	LIM domain only 4
226548_at	754.126	887.426	1.17676	0.00378734	---	AI935915	---
211921_x_at	892.822	1049.7	1.17571	0.0101073	PTMA	AF348514	prothymosin, alpha (gene sequence 28) /// prothymosin, alpha (gene sequence 28)
202225_at	516.436	607.071	1.1755	0.00201108	CRK	AW612311	V-crk sarcoma virus CT10 oncogene homolog (avian)
219654_at	767.414	902.009	1.17539	0.0016622	PTPLA	NM_014241	protein tyrosine phosphatase-like (proline instead of catalytic arginine), member a
212242_at	2411.93	2833.68	1.17486	0.0370041	TUBA1	AL565074	tubulin, alpha 1 (testis specific)
224743_at	1039.44	1221.01	1.17468	0.0211589	FLJ20421	BF674724	hypothetical protein FLJ20421
202156_s_at	372.838	437.709	1.17399	0.0263247	CUGBP2	N36839	CUG triplet repeat, RNA binding protein 2
227798_at	384.981	451.94	1.17393	0.00932611	SMAD1	AU146891	SMAD, mothers against DPP homolog 1 (Drosophila)
203704_s_at	442.404	519.292	1.1738	0.000383193	RREB1	AW118862	ras responsive element binding protein 1
209348_s_at	1382.71	1622.73	1.17358	0.0138733	MAF	AF055376	v-maf musculoaponeurotic fibrosarcoma oncogene homolog (avian)
235308_at	815.838	956.606	1.17254	0.0160959	ZBTB20	AW499525	Zinc finger and BTB domain containing 20
202370_s_at	488.369	572.195	1.17165	0.00148111	CBFB	NM_001755	core-binding factor, beta subunit
203623_at	363.731	425.877	1.17086	0.00270495	PLXNA3	AI675453	plexin A3
215313_x_at	1716.82	2009.4	1.17042	0.00992821	HLA-A	AA573862	major histocompatibility complex, class I, A
201574_at	572.605	670.068	1.17021	0.0042923	ETF1	NM_004730	eukaryotic translation termination factor 1
216044_x_at	281.658	329.477	1.16978	0.000961868	LOC388650	AK027146	hypothetical LOC388650
55692_at	341.352	399.191	1.16944	0.00102509	ELMO2	W22924	engulfment and cell motility 2 (ced-12 homolog, C. elegans)
226250_at	754.203	881.986	1.16943	0.00898041	---	AU144961	CDNA FLJ34585 fis, clone KIDNE2008758
208886_at	1621.05	1895.09	1.16905	0.00971708	H1F0	BC000145	H1 histone family, member 0
201924_at	1778.19	2078.47	1.16887	0.00231756	MLLT2	NM_005935	myeloid/lymphoid or mixed-lineage leukemia (trithorax homolog, Drosophila); translocated to, 2
205801_s_at	425.75	497.432	1.16837	0.020156	RASGRP3	NM_015376	RAS guanyl releasing protein 3 (calcium and DAG-regulated)
217047_s_at	324.997	379.543	1.16784	0.00297802	FAM13A1	AK027138	family with sequence similarity 13, member A1
200028_s_at	3398.3	3968.37	1.16775	0.000886507	STARD7	NM_020151	START domain containing 7 /// START domain containing 7
212230_at	777.553	907.658	1.16733	0.00269167	PPAP2B	AV725664	phosphatidic acid phosphatase type 2B
241793_at	1916.35	2235.35	1.16647	0.0202262	ZMYND17	BE674227	zinc finger, MYND domain containing 17
203846_at	492.57	574.308	1.16594	0.0137247	TRIM32	BC003154	tripartite motif-containing 32
1555832_s_at	414.182	482.028	1.16381	0.0061377	---	BU683415	Homo sapiens, clone IMAGE:4096273, mRNA
218424_s_at	599.789	698.032	1.1638	0.00672635	TSAP6	NM_018234	dudulin 2
210788_s_at	1835.67	2133.86	1.16244	0.000962425	DHRS7	AF126782	dehydrogenase/reductase (SDR family) member 7
218005_at	571.185	663.429	1.1615	0.0095483	ZNF22	AA744771	zinc finger protein 22 (KOX 15)
201197_at	362.313	420.784	1.16138	0.0415543	AMD1	NM_001634	adenosylmethionine decarboxylase 1
218007_s_at	1667.45	1936.26	1.16121	0.0102724	RPS27L	NM_015920	ribosomal protein S27-like
222725_s_at	362.634	420.999	1.16095	0.00723769	PALMD	AI082747	palmdelphin
201146_at	688.237	798.697	1.1605	0.0019747	NFE2L2	NM_006164	nuclear factor (erythroid-derived 2)-like 2
227082_at	498.798	578.52	1.15983	0.0157752	---	AI760356	MRNA; cDNA DKFZp586K1922 (from clone DKFZp586K1922)
224606_at	447.374	518.626	1.15927	0.00895683	---	BG250721	Homo sapiens, clone IMAGE:4096273, mRNA
212298_at	393.413	456.02	1.15914	0.00561297	NRP1	BE620457	neuropilin 1
200880_at	499.341	578.553	1.15863	0.022901	---	AL534104	---
201090_x_at	2257.94	2616.1	1.15862	0.00284078	K-ALPHA-1	NM_006082	tubulin, alpha, ubiquitous
201946_s_at	512.088	592.917	1.15784	0.0224199	CCT2	AL545982	chaperonin containing TCP1, subunit 2 (beta)
227978_s_at	313.264	362.026	1.15566	0.0187303	ZADH2	BF591611	zinc binding alcohol dehydrogenase, domain containing 2
208816_x_at	416.306	480.992	1.15538	0.0330755	ANXA2P2	M62898	annexin A2 pseudogene 2
229160_at	468.638	541.109	1.15464	0.00702182	MUM1L1	AI967987	melanoma associated antigen (mutated) 1-like 1
200850_s_at	1101.66	1271.82	1.15446	0.0018877	AHCYL1	NM_006621	S-adenosylhomocysteine hydrolase-like 1
236261_at	488.374	563.745	1.15433	0.0400571	OSBPL6	AI949389	Oxysterol binding protein-like 6
213433_at	472	544.592	1.1538	0.0377261	ARL3	AF038193	ADP-ribosylation factor-like 3
225204_at	1609.71	1856.37	1.15323	0.0458802	TA-PP2C	AA521311	T-cell activation protein phosphatase 2C
224938_at	364.203	419.925	1.15299	0.00381854	182-FIP	AW007746	82-kD FMRP Interacting Protein
212919_at	300.137	346.027	1.1529	0.039555	DCP2	AV715578	decapping enzyme hDcp2
200848_at	705.538	813.351	1.15281	0.000972098	AHCYL1	AA479488	S-adenosylhomocysteine hydrolase-like 1
209120_at	928.108	1068.86	1.15166	0.0134622	NR2F2	AL037401	nuclear receptor subfamily 2, group F, member 2
208374_s_at	381.629	439.291	1.15109	0.0229965	CAPZA1	NM_006135	capping protein (actin filament) muscle Z-line, alpha 1
200773_x_at	1742.74	2004.95	1.15046	0.0173237	PTMA	NM_002823	prothymosin, alpha (gene sequence 28)
206510_at	441.604	507.8	1.1499	0.0334242	SIX2	AF332197	sine oculis homeobox homolog 2 (Drosophila)
212993_at	409.095	470.156	1.14926	0.00185535	---	AA114166	Transcribed locus, weakly similar to XP_316923.1 Anopheles gambiae str. PEST ENSANGG00000020250 gene
226520_at	307.879	353.787	1.14911	0.012632	---	AI831506	---
213646_x_at	2350.59	2699.43	1.1484	0.00360566	K-ALPHA-1	BE300252	tubulin, alpha, ubiquitous
222450_at	365.388	419.054	1.14687	0.041748	TMEPAI	AL035541	transmembrane, prostate androgen induced RNA
221829_s_at	752.893	863.119	1.1464	0.00693931	TNPO1	AI307759	transportin 1
200849_s_at	942.198	1080.09	1.14635	0.00646665	AHCYL1	AI589266	S-adenosylhomocysteine hydrolase-like 1
202187_s_at	744.177	851.603	1.14436	0.00684898	PPP2R5A	NM_006243	protein phosphatase 2, regulatory subunit B (B56), alpha isoform
226252_at	1003.9	1148.69	1.14423	0.0235853	---	AA058578	CDNA FLJ34585 fis, clone KIDNE2008758
208729_x_at	1253.8	1433.29	1.14315	0.0132784	HLA-B	D83043	major histocompatibility complex, class I, B
211911_x_at	1186.28	1355.46	1.14262	0.0180303	HLA-C /// HLA-B	L07950	major histocompatibility complex, class I, C /// major histocompatibility complex, class I, C /// major histocompatibility complex, class I, B /// major histocompatibility complex, class I, B
218303_x_at	509.153	581.526	1.14214	0.0114672	LOC51315	NM_016618	hypothetical protein LOC51315
218032_at	748.375	854.719	1.1421	0.007208	SNN	AF070673	stannin
211016_x_at	348.707	398.227	1.14201	0.0255817	HSPA4	BC002526	heat shock 70kDa protein 4
214022_s_at	823.705	940.654	1.14198	0.0213307	IFITM1	AA749101	interferon induced transmembrane protein 1 (9-27)
211072_x_at	2482.57	2834.16	1.14162	0.00420652	K-ALPHA-1	BC006481	tubulin, alpha, ubiquitous /// tubulin, alpha, ubiquitous
207543_s_at	1054.82	1204.17	1.14158	0.0450729	P4HA1	NM_000917	procollagen-proline, 2-oxoglutarate 4-dioxygenase (proline 4-hydroxylase), alpha polypeptide I
203231_s_at	601.29	685.63	1.14026	0.0477323	ATXN1	AW235612	ataxin 1
201601_x_at	1046.46	1193.1	1.14012	0.0366925	IFITM1	NM_003641	interferon induced transmembrane protein 1 (9-27)
212535_at	1257.67	1433.26	1.13961	0.000303542	MEF2A	AA142929	MADS box transcription enhancer factor 2, polypeptide A (myocyte enhancer factor 2A)
223904_at	582.894	663.409	1.13813	0.00377172	PRKAG3	AF214519	protein kinase, AMP-activated, gamma 3 non-catalytic subunit
201141_at	521.538	593.382	1.13775	0.0358211	GPNMB	NM_002510	glycoprotein (transmembrane) nmb
213599_at	304.757	346.656	1.13748	0.0254983	OIP5	BE045993	Opa-interacting protein 5
210621_s_at	360.682	409.95	1.1366	0.0284088	RASA1	M23612	RAS p21 protein activator (GTPase activating protein) 1
231899_at	351.124	398.749	1.13564	0.0492948	KIAA1726	AB051513	KIAA1726 protein
212639_x_at	1748.95	1984.81	1.13486	0.0358963	TUBA3 /// K-ALPHA-1	AL581768	tubulin, alpha 3 /// tubulin, alpha, ubiquitous
241749_at	2376.83	2695.61	1.13412	0.00918521	---	AA446953	---
201385_at	590.023	668.951	1.13377	0.000571312	DHX15	NM_001358	DEAH (Asp-Glu-Ala-His) box polypeptide 15
209090_s_at	1813.88	2056.46	1.13374	0.00745539	SH3GLB1	AL049597	SH3-domain GRB2-like endophilin B1
213932_x_at	1792.18	2031.5	1.13353	0.028867	HLA-A	AI923492	major histocompatibility complex, class I, A
208812_x_at	2216.3	2511.67	1.13327	0.0249642	HLA-C /// HLA-B	BC004489	major histocompatibility complex, class I, C /// major histocompatibility complex, class I, B
208961_s_at	476.716	540.193	1.13315	0.000705025	COPEB	AB017493	core promoter element binding protein
212386_at	833.597	944.22	1.13271	0.0172827	TCF4	BF592782	Transcription factor 4
200021_at	2267.5	2568.19	1.13261	0.0492183	CFL1	NM_005507	cofilin 1 (non-muscle) /// cofilin 1 (non-muscle)
236523_at	2542.82	2880.02	1.13261	0.0229906	LOC285556	BF435831	Hypothetical protein LOC285556
200614_at	1280.04	1449.19	1.13214	0.00349688	CLTC	NM_004859	clathrin, heavy polypeptide (Hc)
235744_at	483.99	547.877	1.132	0.021927	TA-PP2C	BG252924	T-cell activation protein phosphatase 2C
211058_x_at	2569.67	2908.22	1.13175	0.00444854	K-ALPHA-1	BC006379	tubulin, alpha, ubiquitous /// tubulin, alpha, ubiquitous
201947_s_at	1237.72	1399.32	1.13056	0.0146656	CCT2	NM_006431	chaperonin containing TCP1, subunit 2 (beta)
212714_at	671.32	758.872	1.13042	0.00436436	LOC113251	AL050205	c-Mpl binding protein
229730_at	2364.28	2672.12	1.1302	0.0387323	FLJ42461	AI193973	FLJ42461 protein
225424_at	357.954	404.504	1.13004	0.0330236	GPAM	AB046780	glycerol-3-phosphate acyltransferase, mitochondrial
204992_s_at	3230.42	3647.51	1.12911	0.0289354	PFN2	NM_002628	profilin 2
211671_s_at	1468.45	1658.04	1.12911	0.00857302	NR3C1	U01351	nuclear receptor subfamily 3, group C, member 1 (glucocorticoid receptor) /// nuclear receptor subfamily 3, group C, member 1 (glucocorticoid receptor)
200813_s_at	755.477	852.371	1.12826	0.00663812	PAFAH1B1	BE256969	platelet-activating factor acetylhydrolase, isoform Ib, alpha subunit 45kDa
216559_x_at	1128.26	1272.88	1.12818	0.0471962	HNRPA1	AL050348	heterogeneous nuclear ribonucleoprotein A1
201865_x_at	1702.81	1920.84	1.12804	0.0120701	NR3C1	AI432196	nuclear receptor subfamily 3, group C, member 1 (glucocorticoid receptor)
200945_s_at	829.908	936.09	1.12794	0.00715097	SEC31L1	NM_014933	SEC31-like 1 (S. cerevisiae)
202501_at	783.827	884.06	1.12788	0.000300341	MAPRE2	NM_014268	microtubule-associated protein, RP/EB family, member 2
225629_s_at	701.505	790.904	1.12744	0.00113472	ZBTB4	AI669498	zinc finger and BTB domain containing 4
201776_s_at	731.48	824.405	1.12704	0.0144967	KIAA0494	AK001487	KIAA0494 gene product
226317_at	486.754	548.457	1.12676	0.0139794	PPP4R2	AI983837	protein phosphatase 4, regulatory subunit 2
203869_at	306.861	345.735	1.12668	0.00988797	USP46	AK024318	ubiquitin specific protease 46
212761_at	323.45	364.061	1.12556	0.0330893	TCF7L2	AI949687	transcription factor 7-like 2 (T-cell specific, HMG-box)
224364_s_at	426.755	480.274	1.12541	0.0401653	PPIL3	AF251049	peptidylprolyl isomerase (cyclophilin)-like 3 /// peptidylprolyl isomerase (cyclophilin)-like 3
212635_at	608.984	685.083	1.12496	0.000100494	TNPO1	AW161626	Transportin 1
202241_at	1010.3	1136.53	1.12494	0.0285901	TRIB1	NM_025195	tribbles homolog 1 (Drosophila)
201660_at	733.893	825.466	1.12478	0.00932094	ACSL3	AL525798	acyl-CoA synthetase long-chain family member 3
224827_at	306.212	344.303	1.12439	0.00112055	DC-UbP	AK022894	Dendritic cell-derived ubiquitin-like protein
213016_at	308.372	346.726	1.12438	0.047694	BBX	AA573805	Bobby sox homolog (Drosophila)
212519_at	1310.19	1473.04	1.12429	0.0232146	UBE2E1	AL518159	ubiquitin-conjugating enzyme E2E 1 (UBC4/5 homolog, yeast)
202741_at	330.327	371.145	1.12357	0.00759481	PRKACB	AA130247	protein kinase, cAMP-dependent, catalytic, beta
221751_at	333.69	374.841	1.12332	0.00223431	PANK3	AL565516	Pantothenate kinase 3
220994_s_at	397.806	446.785	1.12312	0.0136752	STXBP6	NM_014178	syntaxin binding protein 6 (amisyn)
1556151_at	905.488	1016.95	1.1231	0.0174661	CDA08	AI077660	T-cell immunomodulatory protein
203133_at	677.172	759.167	1.12108	0.00250751	SEC61B	NM_006808	Sec61 beta subunit
201193_at	499.632	559.937	1.1207	0.0116681	IDH1	NM_005896	isocitrate dehydrogenase 1 (NADP+), soluble
201437_s_at	378.296	423.858	1.12044	0.0388714	EIF4E	NM_001968	eukaryotic translation initiation factor 4E
222409_at	336.638	377.129	1.12028	0.0221788	CORO1C	AL162070	coronin, actin binding protein, 1C
202644_s_at	348.584	390.313	1.11971	0.0235258	TNFAIP3	NM_006290	tumor necrosis factor, alpha-induced protein 3
214620_x_at	1315.8	1473.2	1.11962	0.0496997	PAM	BF038548	peptidylglycine alpha-amidating monooxygenase
213101_s_at	926.091	1036.61	1.11934	0.00815977	ACTR3	Z78330	ARP3 actin-related protein 3 homolog (yeast)
226538_at	394.203	441.171	1.11915	0.00829841	MAN2A1	AV700323	mannosidase, alpha, class 2A, member 1
207657_x_at	667.518	747.037	1.11913	0.0245106	TNPO1	NM_002270	transportin 1
208986_at	511.58	572.49	1.11906	0.0161178	TCF12	AL559478	transcription factor 12 (HTF4, helix-loop-helix transcription factors 4)
206254_at	414.221	463.501	1.11897	0.0306228	EGF	NM_001963	epidermal growth factor (beta-urogastrone)
209541_at	306.922	343.436	1.11897	0.044597	IGF1	AI972496	insulin-like growth factor 1 (somatomedin C)
201375_s_at	1800.84	2014.9	1.11886	0.0153833	PPP2CB	NM_004156	protein phosphatase 2 (formerly 2A), catalytic subunit, beta isoform
201830_s_at	332.222	371.675	1.11875	0.00640466	NET1	NM_005863	neuroepithelial cell transforming gene 1
208549_x_at	1159	1296.01	1.11821	0.014039	PTMA	NM_016171	prothymosin, alpha (gene sequence 28)
203217_s_at	594.822	664.953	1.1179	0.034213	SIAT9	NM_003896	sialyltransferase 9 (CMP-NeuAc:lactosylceramide alpha-2,3-sialyltransferase; GM3 synthase)
201038_s_at	572.754	640.245	1.11784	0.00447294	ANP32A	T67821	Acidic (leucine-rich) nuclear phosphoprotein 32 family, member A
211931_s_at	667.157	745.67	1.11768	0.0499855	HNRPA3	BG505670	heterogeneous nuclear ribonucleoprotein A3
203640_at	1223.73	1367.4	1.1174	0.0192701	MBNL2	BE328496	muscleblind-like 2 (Drosophila)
244103_at	399.712	446.562	1.11721	0.00577435	FLJ35382	AW963092	hypothetical protein FLJ35382
44783_s_at	358.679	400.714	1.11719	0.0314083	HEY1	R61374	hairy/enhancer-of-split related with YRPW motif 1
212573_at	1216.31	1358.66	1.11703	0.0216919	KIAA0830	AF131747	KIAA0830 protein
218131_s_at	349.969	390.764	1.11657	0.0212002	p66alpha	NM_017660	p66 alpha
223013_at	1235.65	1379.31	1.11626	0.0132823	TBL1XR1	AF267864	transducin (beta)-like 1X-linked receptor 1
203480_s_at	1701.37	1898.65	1.11595	0.0444822	HSHIN1	NM_014928	HIV-1 induced protein HIN-1
234795_at	552.364	616.321	1.11579	0.00787881	SHB	AK001225	SHB (Src homology 2 domain containing) adaptor protein B
200893_at	725.49	809.194	1.11537	0.0368275	SFRS10	NM_004593	splicing factor, arginine/serine-rich 10 (transformer 2 homolog, Drosophila)
224594_x_at	3433	3828.99	1.11535	0.0291967	ACTB	AK025873	actin, beta
201277_s_at	1213.75	1352.16	1.11404	0.00164613	HNRPAB	NM_004499	heterogeneous nuclear ribonucleoprotein A/B
203002_at	482.02	536.746	1.11353	0.0346186	AMOTL2	NM_016201	angiomotin like 2
213151_s_at	1590.13	1769.94	1.11308	0.0132813	CDC10	AU157515	CDC10 cell division cycle 10 homolog (S. cerevisiae)
203544_s_at	381.418	424.542	1.11306	0.0327013	STAM	NM_003473	signal transducing adaptor molecule (SH3 domain and ITAM motif) 1
212293_at	666.625	741.956	1.113	0.0477359	HIPK1	BG111260	homeodomain interacting protein kinase 1
200866_s_at	1767.25	1966.82	1.11292	0.0197103	PSAP	M32221	prosaposin (variant Gaucher disease and variant metachromatic leukodystrophy)
216321_s_at	1663.44	1850.98	1.11274	0.0266771	NR3C1	X03348	nuclear receptor subfamily 3, group C, member 1 (glucocorticoid receptor)
202027_at	556.705	619.188	1.11224	0.000367701	C22orf5	NM_012264	chromosome 22 open reading frame 5
200801_x_at	3613.42	4018.8	1.11219	0.042244	ACTB	NM_001101	actin, beta
206874_s_at	516.502	574.162	1.11164	0.00316691	---	AL138761	---
218517_at	393.236	437.069	1.11147	0.000876908	---	NM_024900	---
212367_at	308.291	342.578	1.11122	0.00657843	FEM1B	AI799061	Fem-1 homolog b (C. elegans)
218418_s_at	388.763	431.813	1.11074	0.00811654	ANKRD25	NM_015493	ankyrin repeat domain 25
218858_at	2444.71	2715.06	1.11058	0.00159817	DEPDC6	NM_022783	DEP domain containing 6
226077_at	357.06	396.509	1.11048	0.0103753	FLJ31951	AL553942	hypothetical protein FLJ31951
212148_at	824.63	915.546	1.11025	0.0127132	PBX1	AL049381	Pre-B-cell leukemia transcription factor 1
202265_at	963.002	1068.95	1.11002	0.0102341	BMI1	NM_005180	B lymphoma Mo-MLV insertion region (mouse)
213867_x_at	3437.18	3813.57	1.1095	0.0391207	ACTB	AA809056	actin, beta
224811_at	697.39	773.408	1.109	0.0147011	---	BF112093	Transcribed locus, moderately similar to NP_787073.2 hypothetical protein MGC35023 [Homo sapiens]
229879_at	525.914	583.081	1.1087	0.00547978	---	BF059124	---
228716_at	494.405	548.108	1.10862	0.017183	---	BG494007	Hypothetical gene supported by AK096885; AK098084
228827_at	325.583	360.942	1.1086	0.0264097	CBFA2T1	AI217416	Core-binding factor, runt domain, alpha subunit 2; translocated to, 1; cyclin D-related
202413_s_at	466.036	516.611	1.10852	0.0146468	USP1	NM_003368	ubiquitin specific protease 1
200778_s_at	773.746	857.703	1.10851	0.0370132	NEDD5	AI191427	neural precursor cell expressed, developmentally down-regulated 5
208803_s_at	398.36	441.544	1.10841	0.0176899	SRP72	AF069765	signal recognition particle 72kDa
206657_s_at	661.087	732.612	1.10819	0.00336675	MYOD1	NM_002478	myogenic factor 3
238877_at	667.881	739.937	1.10789	0.0492563	---	BE674583	---
200752_s_at	697.554	772.809	1.10788	0.0250254	CAPN1	NM_005186	calpain 1, (mu/I) large subunit
210024_s_at	2634.19	2917.46	1.10753	0.00154065	UBE2E3	AB017644	ubiquitin-conjugating enzyme E2E 3 (UBC4/5 homolog, yeast)
202657_s_at	374.27	414.492	1.10747	0.00903909	SERTAD2	NM_014755	SERTA domain containing 2
202154_x_at	967.095	1070.92	1.10736	0.0105682	TUBB4	NM_006086	tubulin, beta, 4
209814_at	1051.61	1164.43	1.10729	0.000513683	ZNF330	BC004421	zinc finger protein 330
202690_s_at	458.701	507.854	1.10716	0.0449518	SNRPD1	BC001721	small nuclear ribonucleoprotein D1 polypeptide 16kDa
201917_s_at	524.802	580.878	1.10685	0.00534692	FLJ10618	AI694452	hypothetical protein FLJ10618
212387_at	615.742	681.101	1.10615	0.0216419	TCF4	BG495771	Transcription factor 4
213891_s_at	604.138	668.262	1.10614	0.0200217	---	AI927067	---
235261_at	2276.38	2517.89	1.1061	0.0477543	CMYA4	AI800785	cardiomyopathy associated 4
213102_at	590.872	653.384	1.1058	0.00512864	ACTR3	Z78330	ARP3 actin-related protein 3 homolog (yeast)
202946_s_at	308.399	340.88	1.10532	0.0439842	BTBD3	NM_014962	BTB (POZ) domain containing 3
203947_at	328.977	363.608	1.10527	0.00215159	CSTF3	NM_001326	cleavage stimulation factor, 3' pre-RNA, subunit 3, 77kDa
208865_at	1501.19	1659.1	1.1052	0.0118831	CSNK1A1	BG534245	casein kinase 1, alpha 1
213860_x_at	972.18	1074.18	1.10492	0.00264883	CSNK1A1	AW268585	casein kinase 1, alpha 1
214764_at	349.379	385.96	1.1047	0.0320976	KIAA0507	AW029169	KIAA0507 protein
200634_at	1115.03	1231.47	1.10443	0.00276849	PFN1	NM_005022	profilin 1
202294_at	562.011	620.681	1.10439	0.0182796	---	AI126490	---
202899_s_at	726.811	802.674	1.10438	0.00574962	SFRS3	NM_003017	splicing factor, arginine/serine-rich 3
218348_s_at	386.776	426.955	1.10388	0.00384252	ZC3HDC7	NM_014153	zinc finger CCCH type domain containing 7
210616_s_at	744.197	821.461	1.10382	0.0295517	SEC31L1	AB020712	SEC31-like 1 (S. cerevisiae)
221667_s_at	5188.94	5727.57	1.1038	0.025707	HSPB8	AF133207	heat shock 22kDa protein 8
227013_at	616.989	680.948	1.10366	0.00158723	---	AI535735	---
200723_s_at	914.378	1009.06	1.10355	0.0019791	M11S1	NM_005898	membrane component, chromosome 11, surface marker 1
209200_at	3330.55	3675.16	1.10347	0.0115267	---	AL536517	---
225585_at	574.562	633.886	1.10325	0.017544	RAP2A	AI963476	RAP2A, member of RAS oncogene family
208843_s_at	521.063	574.806	1.10314	0.0187091	GORASP2	BC001408	golgi reassembly stacking protein 2, 55kDa
230913_at	328.631	362.458	1.10293	0.0391923	---	BE674309	Full length insert cDNA clone ZE12B03
202858_at	1087.11	1198.93	1.10286	0.0460489	U2AF1	NM_006758	U2(RNU2) small nuclear RNA auxiliary factor 1
207760_s_at	2089.47	2303.67	1.10251	0.0176571	NCOR2	NM_006312	nuclear receptor co-repressor 2
224788_at	399.726	440.637	1.10235	0.00428454	ARF6	AV700721	ADP-ribosylation factor 6
230958_s_at	654.968	721.957	1.10228	0.0483826	---	BE670797	---
234537_at	306.328	337.649	1.10225	0.019716	---	AK000792	---
203933_at	370.004	407.774	1.10208	0.0420435	RAB11FIP3	NM_014700	RAB11 family interacting protein 3 (class II)
233329_s_at	364.565	401.754	1.10201	0.0276874	LOC51315	AK025986	hypothetical protein LOC51315
221875_x_at	931.636	1026.6	1.10193	0.024723	HLA-F	AW514210	major histocompatibility complex, class I, F
223253_at	1746.6	1924.62	1.10193	0.00129056	UCC1	BC000686	upregulated in colorectal cancer gene 1
226955_at	719.807	793.149	1.10189	0.0047969	FLJ36748	H28999	Hypothetical protein FLJ36748
225007_at	630.245	694.443	1.10186	0.0146803	G3BP	AV705516	Ras-GTPase-activating protein SH3-domain-binding protein
212878_s_at	710.901	783.271	1.1018	0.00854509	KNS2	AA284075	kinesin 2 60/70kDa
218093_s_at	1095.79	1207.33	1.10178	0.0173264	ANKRD10	NM_017664	ankyrin repeat domain 10
201266_at	998.441	1100.06	1.10177	0.0188758	TXNRD1	NM_003330	thioredoxin reductase 1
224571_at	394.703	434.85	1.10172	0.0292949	IRF2BP2	BF968057	Interferon regulatory factor 2 binding protein 2
201598_s_at	705.681	777.406	1.10164	0.00516148	INPPL1	NM_001567	inositol polyphosphate phosphatase-like 1
225202_at	511.415	563.361	1.10157	0.03399	---	BE620739	---
213086_s_at	776.887	855.626	1.10135	0.00993478	CSNK1A1	BF341845	casein kinase 1, alpha 1
212712_at	454.781	500.707	1.10099	0.0457266	CAMSAP1	BE222901	calmodulin regulated spectrin-associated protein 1
223538_at	308.701	339.76	1.10061	0.0128704	SERF1A	AF073518	small EDRK-rich factor 1A (telomeric)
215903_s_at	1166.92	1284.29	1.10058	0.00166416	MAST2	BE786598	microtubule associated serine/threonine kinase 2
203667_at	1067.03	1174.11	1.10035	0.0350626	TBCA	NM_004607	tubulin-specific chaperone a
225763_at	1365.02	1501.63	1.10008	0.0383875	MK2S4	AI659418	protein kinase substrate MK2S4
202555_s_at	357.514	393.052	1.0994	0.0494628	MYLK	NM_005965	myosin, light polypeptide kinase /// myosin, light polypeptide kinase
212371_at	665.5	731.498	1.09917	0.0118101	PNAS-4	AL049397	CGI-146 protein
225910_at	401.882	441.727	1.09915	0.0079054	---	BF514723	---
202313_at	1129.71	1241.68	1.09911	0.00125217	PPP2R2A	NM_002717	protein phosphatase 2 (formerly 2A), regulatory subunit B (PR 52), alpha isoform
208848_at	466.471	512.598	1.09889	0.0120514	ADH5	M30471	alcohol dehydrogenase 5 (class III), chi polypeptide
211530_x_at	1112.45	1222.25	1.0987	0.0328864	HLA-G	M90686	HLA-G histocompatibility antigen, class I, G
228367_at	868.38	954.069	1.09868	0.0352245	HAK	BE551416	heart alpha-kinase
225340_s_at	683.651	751.02	1.09854	4.77e-05	---	BG107845	---
234980_at	589.168	647.021	1.09819	0.0166735	FLJ31842	AI004375	hypothetical protein FLJ31842
202985_s_at	390.983	429.354	1.09814	0.000302638	BAG5	NM_004873	BCL2-associated athanogene 5
210514_x_at	986.4	1083.02	1.09796	0.0486316	HLA-G	AF226990	HLA-G histocompatibility antigen, class I, G
205225_at	297.852	326.767	1.09708	0.0355127	ESR1	NM_000125	estrogen receptor 1
201877_s_at	739.888	811.694	1.09705	0.0239361	PPP2R5C	NM_002719	protein phosphatase 2, regulatory subunit B (B56), gamma isoform
224765_at	1026.31	1125.77	1.09691	0.0190502	LOC339287	AA001203	hypothetical protein LOC339287
205824_at	1606.83	1762.52	1.09689	0.0494382	HSPB2	NM_001541	heat shock 27kDa protein 2
223144_s_at	889.056	974.737	1.09637	0.0414612	C6orf166	BC000764	chromosome 6 open reading frame 166
211529_x_at	1071	1173.77	1.09596	0.0498262	HLA-G	M90684	HLA-G histocompatibility antigen, class I, G
225643_at	390.608	428.053	1.09586	0.00149856	C14orf32	AI261542	Chromosome 14 open reading frame 32
218974_at	779.11	853.785	1.09585	0.0132428	FLJ10159	NM_018013	hypothetical protein FLJ10159
204806_x_at	889.039	974.028	1.0956	0.0131453	HLA-F	NM_018950	major histocompatibility complex, class I, F
201051_at	970.707	1063.22	1.09531	0.0197915	ANP32A	BE560202	Acidic (leucine-rich) nuclear phosphoprotein 32 family, member A
200016_x_at	4241.34	4645.4	1.09527	0.00422103	HNRPA1	NM_002136	heterogeneous nuclear ribonucleoprotein A1 /// heterogeneous nuclear ribonucleoprotein A1
209121_x_at	955.399	1046.36	1.0952	0.0103099	NR2F2	M64497	nuclear receptor subfamily 2, group F, member 2
211528_x_at	1198.05	1312.01	1.09512	0.019918	HLA-G	M90685	HLA-G histocompatibility antigen, class I, G
201386_s_at	622.117	680.839	1.09439	0.000754412	DHX15	AF279891	DEAH (Asp-Glu-Ala-His) box polypeptide 15
226722_at	470.575	514.957	1.09431	0.010363	FAM20C	BE874872	family with sequence similarity 20, member C
224955_at	1740.84	1904.75	1.09415	0.00851575	TEAD1	AI590088	TEA domain family member 1 (SV40 transcriptional enhancer factor)
212419_at	1090.57	1193.12	1.09403	0.0353336	C10orf56	AA131324	chromosome 10 open reading frame 56
202761_s_at	3346.68	3661.37	1.09403	0.00258053	SYNE2	NM_015180	spectrin repeat containing, nuclear envelope 2
203428_s_at	339.507	371.312	1.09368	0.0282809	ASF1A	AB028628	ASF1 anti-silencing function 1 homolog A (S. cerevisiae)
209332_s_at	601.883	658.081	1.09337	0.0413688	MAX	BC003525	MAX protein
204058_at	595.038	650.379	1.093	0.0439191	ME1	AL049699	Malic enzyme 1, NADP(+)-dependent, cytosolic
207922_s_at	378.42	413.572	1.09289	0.0436102	MAEA	NM_005882	macrophage erythroblast attacher
211799_x_at	588.664	643.291	1.0928	0.0114459	HLA-A /// HLA-C	U62824	major histocompatibility complex, class I, A /// major histocompatibility complex, class I, C
212749_s_at	623.514	681.326	1.09272	0.00403702	RCHY1	AI096477	ring finger and CHY zinc finger domain containing 1
201398_s_at	607.285	663.569	1.09268	0.0252944	TRAM1	BC000687	translocation associated membrane protein 1
210101_x_at	1751.61	1913.91	1.09266	0.00157263	SH3GLB1	AF257318	SH3-domain GRB2-like endophilin B1
222726_s_at	408.74	446.447	1.09225	0.0317539	SEC10L1	BF696912	SEC10-like 1 (S. cerevisiae)
202653_s_at	1035.64	1130.71	1.0918	0.0294208	AXOT	BC003404	axotrophin
224880_at	680.652	743.044	1.09166	0.00669562	RALA	AV703462	v-ral simian leukemia viral oncogene homolog A (ras related)
200728_at	913.726	997.468	1.09165	0.000758864	ACTR2	BE566290	ARP2 actin-related protein 2 homolog (yeast)
228204_at	300.454	327.976	1.0916	0.00927397	---	AA630330	---
225859_at	419.19	457.575	1.09157	0.00683027	BIRC4	N30645	baculoviral IAP repeat-containing 4
213578_at	491.64	536.42	1.09108	0.0117992	BMPR1A	AI678679	bone morphogenetic protein receptor, type IA
216095_x_at	456.267	497.777	1.09098	0.0104338	MTMR1	AF057354	myotubularin related protein 1
227049_at	558.397	609.114	1.09083	0.024084	ZADH2	N21127	zinc binding alcohol dehydrogenase, domain containing 2
210645_s_at	924.595	1008.5	1.09075	0.000637591	TTC3	D83077	tetratricopeptide repeat domain 3
202496_at	317.406	346.205	1.09073	0.00126601	RCD-8	NM_014329	autoantigen
223051_at	1252.85	1366.36	1.09061	0.0281195	HSPC182	AF277178	HSPC182 protein
225569_at	482.445	526.096	1.09048	0.0422795	EIF2C2	AI813489	Eukaryotic translation initiation factor 2C, 2
208815_x_at	536.172	584.683	1.09048	0.00603353	HSPA4	AB023420	heat shock 70kDa protein 4
1558142_at	337.458	367.978	1.09044	0.00528335	---	AL831862	HepG2 3' region cDNA, clone hmd1c07.
217834_s_at	401.609	437.858	1.09026	0.00731745	SYNCRIP	NM_006372	synaptotagmin binding, cytoplasmic RNA interacting protein
215499_at	1036.64	1130.2	1.09025	0.00854802	---	AA780381	---
228132_at	1251.4	1364.3	1.09022	0.0285212	ABLIM2	AI240129	actin binding LIM protein family, member 2
213356_x_at	4080.76	4448.91	1.09022	0.0033769	HNRPA1	AL568186	heterogeneous nuclear ribonucleoprotein A1
201938_at	1275.69	1390.77	1.09021	0.0383176	CDK2AP1	NM_004642	CDK2-associated protein 1
200760_s_at	2401.23	2617.3	1.08998	0.0116791	ARL6IP5	N92494	ADP-ribosylation-like factor 6 interacting protein 5
208703_s_at	460.719	502.162	1.08995	0.0232315	APLP2	BG427393	amyloid beta (A4) precursor-like protein 2
203132_at	691.455	753.618	1.0899	0.0446852	RB1	NM_000321	retinoblastoma 1 (including osteosarcoma)
224935_at	462.787	504.365	1.08984	0.0494315	EIF2S3	BG165815	Eukaryotic translation initiation factor 2, subunit 3 gamma, 52kDa
201115_at	510.377	556.228	1.08984	0.017089	POLD2	NM_006230	polymerase (DNA directed), delta 2, regulatory subunit 50kDa
211596_s_at	726.816	792.03	1.08973	0.0477058	LRIG1	AB050468	leucine-rich repeats and immunoglobulin-like domains 1 /// leucine-rich repeats and immunoglobulin-like domains 1
224939_at	583.221	635.549	1.08972	0.0211767	182-FIP	AU144387	82-kD FMRP Interacting Protein
202794_at	320.697	349.448	1.08965	0.0015056	INPP1	NM_002194	inositol polyphosphate-1-phosphatase
226380_at	331.207	360.889	1.08962	0.0489005	---	N21442	---
226280_at	554.213	603.52	1.08897	0.0281346	BNIP2	AA133277	BCL2/adenovirus E1B 19kDa interacting protein 2
218728_s_at	320.181	348.656	1.08893	0.0224834	HSPC163	NM_014184	HSPC163 protein
226507_at	912.055	993.163	1.08893	0.0274565	PAK1	AU154408	p21/Cdc42/Rac1-activated kinase 1 (STE20 homolog, yeast)
200625_s_at	329.605	358.901	1.08888	0.0426082	CAP1	NM_006367	CAP, adenylate cyclase-associated protein 1 (yeast)
223380_s_at	546.282	594.755	1.08873	0.00185499	LATS2	AF207547	LATS, large tumor suppressor, homolog 2 (Drosophila)
202220_at	289.519	315.01	1.08805	0.0398782	KIAA0907	NM_014949	KIAA0907 protein
219647_at	625.869	680.861	1.08787	0.0100881	POPDC2	NM_022135	popeye domain containing 2
212136_at	434.243	472.376	1.08782	0.000788113	ATP2B4	AW517686	ATPase, Ca++ transporting, plasma membrane 4
212151_at	1237.67	1346.27	1.08774	0.0272225	PBX1	BF967998	Pre-B-cell leukemia transcription factor 1
203351_s_at	405.959	441.41	1.08733	6.2e-05	ORC4L	AF047598	origin recognition complex, subunit 4-like (yeast)
221276_s_at	1337.64	1454.43	1.08731	0.00554729	SYNCOILIN	NM_030786	intermediate filament protein syncoilin /// intermediate filament protein syncoilin
208774_at	614.36	667.927	1.08719	0.0028858	CSNK1D	AV700224	Casein kinase 1, delta
202822_at	801.523	871.354	1.08712	0.0411996	LPP	BF221852	LIM domain containing preferred translocation partner in lipoma
209091_s_at	1536.44	1670.29	1.08712	0.00128659	SH3GLB1	AF263293	SH3-domain GRB2-like endophilin B1
200761_s_at	2656.4	2887.72	1.08708	0.0236878	ARL6IP5	NM_006407	ADP-ribosylation-like factor 6 interacting protein 5
208131_s_at	365.327	397.071	1.08689	0.00261823	PTGIS	NM_000961	prostaglandin I2 (prostacyclin) synthase /// prostaglandin I2 (prostacyclin) synthase
202224_at	554.944	603.089	1.08676	0.00277691	CRK	BF304695	v-crk sarcoma virus CT10 oncogene homolog (avian)
212008_at	581.423	631.824	1.08668	0.0156972	UBXD2	N29889	UBX domain containing 2
201410_at	550.003	597.586	1.08651	0.0452024	PLEKHB2	AI983043	Pleckstrin homology domain containing, family B (evectins) member 2
201786_s_at	526.222	571.732	1.08648	0.00017897	ADAR	NM_001111	adenosine deaminase, RNA-specific
212124_at	544.738	591.801	1.08639	0.00938267	RAI17	AF070622	retinoic acid induced 17
223134_at	390.966	424.575	1.08597	0.0049243	BBX	AI795970	bobby sox homolog (Drosophila)
200040_at	1109.98	1205.25	1.08583	0.0152394	KHDRBS1	NM_006559	KH domain containing, RNA binding, signal transduction associated 1 /// KH domain containing, RNA binding, signal transduction associated 1
221492_s_at	468.7	508.856	1.08567	0.00645741	APG3L	AF202092	APG3 autophagy 3-like (S. cerevisiae)
224995_at	456.326	495.311	1.08543	0.00854652	SPIRE1	AJ277587	spire homolog 1 (Drosophila)
238578_at	1692.47	1836.98	1.08539	0.0325689	FLJ30294	BF574691	hypothetical protein FLJ30294
214737_x_at	1203.94	1306.71	1.08536	0.0397039	HNRPC	AV725195	heterogeneous nuclear ribonucleoprotein C (C1/C2)
201180_s_at	332.471	360.832	1.0853	0.0316298	GNAI3	J03198	guanine nucleotide binding protein (G protein), alpha inhibiting activity polypeptide 3
224944_at	442.687	480.434	1.08527	0.0064165	---	AL566034	---
208760_at	459.466	498.491	1.08494	0.0205653	UBE2I	AL031714	Ubiquitin-conjugating enzyme E2I (UBC9 homolog, yeast)
202514_at	310.888	337.118	1.08437	0.0220752	DLG1	AW139131	DKFZP586B0319 protein
217353_at	515.033	558.464	1.08433	0.0496135	HNRPA1	AL022097	heterogeneous nuclear ribonucleoprotein A1
214665_s_at	1788.81	1938.6	1.08374	0.0313557	CHP	AK000095	calcium binding protein P22
202218_s_at	342.481	371.058	1.08344	0.0237169	FADS2	NM_004265	fatty acid desaturase 2
212248_at	456.737	494.629	1.08296	0.0259789	LYRIC	AI886796	LYRIC/3D3
220486_x_at	496.076	537.197	1.08289	0.0105296	FLJ22679	NM_017698	hypothetical protein FLJ22679
206453_s_at	4274.11	4627.45	1.08267	0.0260805	NDRG2	NM_016250	NDRG family member 2
209225_x_at	732.126	792.6	1.0826	0.0384431	TNPO1	AI653355	transportin 1
209290_s_at	1234.24	1336.07	1.08251	0.0183715	NFIB	BC001283	nuclear factor I/B
213030_s_at	321.634	348.076	1.08221	0.0420078	PLXNA2	AI688418	plexin A2
212718_at	521.396	564.23	1.08215	0.0103412	PAPOLA	BF797555	poly(A) polymerase alpha
223106_at	1339.9	1449.56	1.08184	0.0176384	TMEM14C	BC002496	transmembrane protein 14C
226801_s_at	866.728	937.53	1.08169	0.0250111	FLJ12806	W72220	hypothetical protein FLJ12806
201829_at	536.057	579.84	1.08168	0.0445981	NET1	AW263232	neuroepithelial cell transforming gene 1
203565_s_at	496.209	536.731	1.08166	0.00932478	MNAT1	NM_002431	menage a trois 1 (CAK assembly factor)
212606_at	296.794	320.952	1.0814	0.00861075	WDFY3	AL536319	WD repeat and FYVE domain containing 3
203674_at	519.295	561.52	1.08131	0.00633164	HELZ	NM_014877	helicase with zinc finger domain
225499_at	520.455	562.746	1.08126	0.0407146	KIAA1272	AW296194	KIAA1272 protein
222146_s_at	538.752	582.491	1.08119	0.0210758	TCF4	AK026674	transcription factor 4
212086_x_at	700.585	757.149	1.08074	0.0021846	LMNA	AK026584	lamin A/C
235921_at	363.124	392.409	1.08065	0.0151838	---	AI761207	---
200052_s_at	551.189	595.616	1.0806	0.0232752	ILF2	NM_004515	interleukin enhancer binding factor 2, 45kDa /// interleukin enhancer binding factor 2, 45kDa
226977_at	511.555	552.779	1.08059	0.0257268	---	N26029	Homo sapiens, clone IMAGE:5275203, mRNA
201800_s_at	904.857	977.629	1.08042	0.0436471	OSBP	AF185696	oxysterol binding protein
217946_s_at	510.656	551.642	1.08026	0.0334632	---	NM_016402	---
212802_s_at	517.958	559.476	1.08016	0.0241268	DKFZP434C212	AK023841	DKFZP434C212 protein
219353_at	353.125	381.421	1.08013	0.0235452	NHLRC2	NM_017687	NHL repeat containing 2
227991_x_at	497.615	537.448	1.08005	0.0278915	---	BF516567	---
212345_s_at	305.797	330.147	1.07963	0.0139628	CREB3L2	BE675139	cAMP responsive element binding protein 3-like 2
217456_x_at	1483.82	1601.77	1.07949	0.0382302	HLA-E	M31183	major histocompatibility complex, class I, E
202071_at	544.248	587.463	1.0794	0.0279228	SDC4	NM_002999	syndecan 4 (amphiglycan, ryudocan)
200837_at	682.881	736.938	1.07916	0.0273693	BCAP31	NM_005745	B-cell receptor-associated protein 31
219778_at	616.351	665.017	1.07896	0.0144352	ZFPM2	NM_012082	zinc finger protein, multitype 2
200905_x_at	1571.07	1695.08	1.07894	0.035013	HLA-E	NM_005516	major histocompatibility complex, class I, E
212520_s_at	362.903	391.534	1.07889	0.00778566	SMARCA4	AI684141	SWI/SNF related, matrix associated, actin dependent regulator of chromatin, subfamily a, member 4
218656_s_at	525.039	566.229	1.07845	0.0207273	LHFP	NM_005780	lipoma HMGIC fusion partner
201522_x_at	1910.94	2060.69	1.07837	0.00312576	SNURF /// SNRPN	NM_003097	SNRPN upstream reading frame /// small nuclear ribonucleoprotein polypeptide N
220746_s_at	324.385	349.737	1.07815	0.0113754	RAP80	NM_016290	receptor associated protein 80
224813_at	718.634	774.572	1.07784	0.0240851	WASL	AL523820	Wiskott-Aldrich syndrome-like
228220_at	314.539	339.001	1.07777	0.045941	FCHO2	AI627666	FCH domain only 2
232008_s_at	443.943	478.447	1.07772	0.0210355	BBX	AF283775	bobby sox homolog (Drosophila)
224616_at	965.113	1039.79	1.07738	0.0346182	DNCLI2	BG110975	dynein, cytoplasmic, light intermediate polypeptide 2
226740_x_at	851.803	917.604	1.07725	0.0288425	MGC8902 /// LOC376745 /// DJ328E19.C1.1 /// LOC200030 /// LOC348482	BF740216	hypothetical protein MGC8902 /// AG1 /// hypothetical protein DJ328E19.C1.1 /// hypothetical protein LOC200030 /// hypothetical protein LOC348482
227698_s_at	349.545	376.498	1.07711	0.00891055	---	AW007215	---
211015_s_at	481.07	518.157	1.07709	0.0272536	HSPA4	L12723	heat shock 70kDa protein 4
214281_s_at	504.651	543.551	1.07708	0.0215101	RCHY1	AA524525	ring finger and CHY zinc finger domain containing 1
200609_s_at	889.517	957.962	1.07695	0.0242039	WDR1	NM_017491	WD repeat domain 1
201524_x_at	1085.99	1169.19	1.07662	0.00480949	UBE2N	NM_003348	ubiquitin-conjugating enzyme E2N (UBC13 homolog, yeast)
201359_at	432.23	465.232	1.07635	0.0118608	COPB	NM_016451	coatomer protein complex, subunit beta
212506_at	708.452	762.307	1.07602	0.0160668	PICALM	AL135735	Phosphatidylinositol binding clathrin assembly protein
223215_s_at	416.716	448.391	1.07601	0.00999911	C14orf100	AF151047	chromosome 14 open reading frame 100
217758_s_at	591.357	636.165	1.07577	0.0215708	SMBP	NM_020123	SM-11044 binding protein
224787_s_at	807.424	868.585	1.07575	0.0378863	RAB18	AI333232	RAB18, member RAS oncogene family
224626_at	820.655	882.655	1.07555	0.000961675	SLC35A4	BE618656	solute carrier family 35, member A4
224586_x_at	1407.91	1514.01	1.07536	0.0447925	PC4	BE784583	activated RNA polymerase II transcription cofactor 4
213710_s_at	1122.81	1207.22	1.07518	0.0190746	---	AL523275	---
212265_at	964.091	1035.83	1.07442	0.0412679	QKI	AL031781	quaking homolog, KH domain RNA binding (mouse)
202560_s_at	1056.63	1135.02	1.07418	0.0151735	DKFZP547E1010	NM_015607	DKFZP547E1010 protein
224914_s_at	751.622	807.297	1.07407	0.00243174	CIP29	BG394042	cytokine induced protein 29 kDa
225284_at	302.572	324.98	1.07406	0.0360115	LOC144871	AA639752	hypothetical protein LOC144871
202727_s_at	487.147	523.221	1.07405	0.0389143	IFNGR1	NM_000416	interferon gamma receptor 1
212576_at	632.935	679.786	1.07402	0.00218867	MGRN1	AB011116	mahogunin, ring finger 1
202076_at	907.922	974.98	1.07386	0.0360332	BIRC2	NM_001166	baculoviral IAP repeat-containing 2
235899_at	530.858	570.063	1.07385	0.0111348	CA13	BF447703	carbonic anhydrase XIII
202510_s_at	298.591	320.618	1.07377	0.0376789	TNFAIP2	NM_006291	tumor necrosis factor, alpha-induced protein 2
212570_at	417.017	447.762	1.07372	0.0237494	KIAA0830	AL573201	KIAA0830 protein
226395_at	631.809	678.319	1.07361	0.0299226	LOC286170	AI912618	hypothetical protein LOC286170
212175_s_at	326.158	350.119	1.07347	0.0409503	AK2	AL513611	adenylate kinase 2
200892_s_at	585.051	627.887	1.07322	0.0125324	SFRS10	BC000451	splicing factor, arginine/serine-rich 10 (transformer 2 homolog, Drosophila)
208668_x_at	3077.93	3303.01	1.07313	0.0443833	HMGN2	BC003689	high-mobility group nucleosomal binding domain 2
225084_at	521.75	559.81	1.07295	0.0243095	SEC10L1	BG170743	SEC10-like 1 (S. cerevisiae)
210338_s_at	5233.45	5614.88	1.07288	0.00922032	HSPA8	AB034951	heat shock 70kDa protein 8
226549_at	683.458	732.99	1.07247	0.0451498	---	BF447901	---
212646_at	462.432	495.946	1.07247	0.0246468	RAFTLIN	D42043	raft-linking protein
203487_s_at	494.001	529.74	1.07235	0.0242969	ARMC8	NM_015396	armadillo repeat containing 8
201176_s_at	665.707	713.845	1.07231	0.012214	ARCN1	NM_001655	archain 1
212764_at	1579.11	1693.12	1.0722	0.00783702	TCF8	AI806174	transcription factor 8 (represses interleukin 2 expression)
224711_at	575.588	617.08	1.07209	0.0284238	SLC25A29	AI670903	Solute carrier family 25, member 29
208696_at	1333.68	1429.53	1.07187	0.0243358	CCT5	AF275798	chaperonin containing TCP1, subunit 5 (epsilon)
222399_s_at	568.648	609.508	1.07185	0.011612	SMBP	BG104571	SM-11044 binding protein
204321_at	385.357	412.938	1.07157	0.0219806	NEO1	NM_002499	neogenin homolog 1 (chicken)
206875_s_at	486.272	521.04	1.0715	0.040903	SLK	NM_014720	STE20-like kinase (yeast)
229696_at	389.298	417.075	1.07135	0.0422273	---	AI807483	---
209861_s_at	1160.58	1243.28	1.07125	0.00187112	METAP2	U13261	methionyl aminopeptidase 2
207435_s_at	1300.69	1393.19	1.07111	0.0015133	SRRM2	NM_016333	serine/arginine repetitive matrix 2
223993_s_at	867.901	929.617	1.07111	0.0377138	HSPC163	AL136930	HSPC163 protein
213489_at	720.391	771.386	1.07079	0.014787	---	BE671156	---
218152_at	580.065	621.105	1.07075	0.0320412	HMG20A	NM_018200	high-mobility group 20A
226183_at	340.206	364.17	1.07044	0.0115553	GSK3B	AW139538	Glycogen synthase kinase 3 beta
202762_at	691.872	740.555	1.07036	0.0226551	ROCK2	AL049383	Rho-associated, coiled-coil containing protein kinase 2
200059_s_at	3010.24	3221.86	1.0703	0.0220157	RHOA	BC001360	ras homolog gene family, member A /// ras homolog gene family, member A
210554_s_at	533.909	571.44	1.0703	0.0125883	CTBP2	BC002486	C-terminal binding protein 2
226694_at	404.432	432.817	1.07018	0.0452721	PALM2-AKAP2	BG540494	PALM2-AKAP2 protein
208780_x_at	2494.86	2669.5	1.07	0.0142586	VAPA	AF154847	VAMP (vesicle-associated membrane protein)-associated protein A, 33kDa
210460_s_at	1319.83	1411.98	1.06982	0.032991	PSMD4	AB033605	proteasome (prosome, macropain) 26S subunit, non-ATPase, 4
202244_at	2273.56	2431.28	1.06937	0.0346997	PSMB4	NM_002796	proteasome (prosome, macropain) subunit, beta type, 4
213305_s_at	354.17	378.729	1.06934	0.00703514	PPP2R5C	L42375	protein phosphatase 2, regulatory subunit B (B56), gamma isoform
205687_at	305.983	327.172	1.06925	0.0382662	UBPH	NM_019116	similar to ubiquitin binding protein
202654_x_at	906.117	968.837	1.06922	0.0145124	AXOT	NM_022826	axotrophin
213751_at	298.507	319.131	1.06909	0.0208362	LOC284352	AW873594	Hypothetical protein LOC284352
225223_at	397.975	425.45	1.06904	0.0498342	SMAD5	AI478523	SMAD, mothers against DPP homolog 5 (Drosophila)
204550_x_at	1468.03	1569.35	1.06902	0.047429	GSTM1	NM_000561	glutathione S-transferase M1
202568_s_at	496.924	531.196	1.06897	0.0382435	MARK3	AI745639	MAP/microtubule affinity-regulating kinase 3
218307_at	520.788	556.657	1.06887	0.0211577	FLJ11164	NM_018346	hypothetical protein FLJ11164
208790_s_at	493.702	527.65	1.06876	0.0190496	PTRF	AF312393	polymerase I and transcript release factor
225810_at	664.075	709.632	1.0686	0.0206821	FLJ20313	AL572015	hypothetical protein FLJ20313
1555467_a_at	375.376	401.118	1.06858	0.0121567	CUGBP1	AF267533	CUG triplet repeat, RNA binding protein 1
223988_x_at	485.486	518.754	1.06853	0.0102446	FLJ20859	BC005053	FLJ20859 gene
201855_s_at	382.274	408.469	1.06852	0.0473552	KIAA0431	NM_015251	KIAA0431 protein
202293_at	346.243	369.929	1.06841	0.0159352	STAG1	AW168948	Stromal antigen 1
205110_s_at	672.101	718.069	1.06839	0.0383587	FGF13	NM_004114	fibroblast growth factor 13
200765_x_at	545.996	583.194	1.06813	0.00703124	CTNNA1	NM_001903	catenin (cadherin-associated protein), alpha 1, 102kDa
233669_s_at	1461.98	1561.48	1.06806	0.0259632	RNF30	AA868267	ring finger protein 30
200871_s_at	2953.86	3154.1	1.06779	0.0282491	PSAP	NM_002778	prosaposin (variant Gaucher disease and variant metachromatic leukodystrophy)
203435_s_at	528.465	564.267	1.06775	0.00983838	MME	NM_007287	membrane metallo-endopeptidase (neutral endopeptidase, enkephalinase, CALLA, CD10)
220547_s_at	340.896	363.966	1.06767	0.0219288	FAM35A	NM_019054	family with sequence similarity 35, member A
203120_at	376.036	401.416	1.0675	0.00801029	TP53BP2	NM_005426	tumor protein p53 binding protein, 2
222389_s_at	930.316	992.896	1.06727	0.0405435	WAC	BE879807	WW domain containing adaptor with coiled-coil
202243_s_at	1169.58	1248.24	1.06725	0.0196451	PSMB4	NM_002796	proteasome (prosome, macropain) subunit, beta type, 4
227977_at	557.572	594.98	1.06709	0.0239818	ZADH2	BF591611	zinc binding alcohol dehydrogenase, domain containing 2
202153_s_at	438.371	467.758	1.06704	0.0473425	NUP62	NM_016553	nucleoporin 62kDa
205817_at	656.183	700.143	1.06699	0.0147823	SIX1	NM_005982	sine oculis homeobox homolog 1 (Drosophila)
213037_x_at	1317.4	1405.57	1.06693	0.0160294	---	AJ132258	---
209898_x_at	393.249	419.518	1.0668	0.0171055	ITSN2	U61167	intersectin 2
227569_at	326.86	348.608	1.06654	0.0166049	LNX2	AU151331	ligand of numb-protein X 2
221952_x_at	1916.51	2043.64	1.06634	0.0422034	KIAA1393	AB037814	KIAA1393
205722_s_at	330.788	352.692	1.06622	0.0411779	GFRA2	NM_001495	GDNF family receptor alpha 2
203721_s_at	357.515	380.961	1.06558	0.0395963	CGI-48	NM_016001	CGI-48 protein
234294_x_at	409.032	435.855	1.06558	0.00597748	p66alpha	AL390164	p66 alpha
202429_s_at	1220.22	1300.04	1.06542	0.0129541	PPP3CA	AL353950	protein phosphatase 3 (formerly 2B), catalytic subunit, alpha isoform (calcineurin A alpha)
226860_at	456.994	486.877	1.06539	0.0288957	TMEM19	AW572609	transmembrane protein 19
212056_at	533.296	568.156	1.06537	0.0290857	KIAA0182	D80004	KIAA0182 protein
217831_s_at	628.279	669.083	1.06494	0.0372488	NSFL1C	NM_016143	NSFL1 (p97) cofactor (p47)
220319_s_at	519.384	553.068	1.06485	0.0349801	MYLIP	NM_013262	myosin regulatory light chain interacting protein
200904_at	897.192	955.378	1.06485	0.0490711	HLA-E	X56841	major histocompatibility complex, class I, E
201878_at	471.251	501.674	1.06456	0.0125573	ARIH1	N25546	ariadne homolog, ubiquitin-conjugating enzyme E2 binding protein, 1 (Drosophila)
205389_s_at	2441.32	2598.66	1.06445	0.00834683	ANK1	AI659683	ankyrin 1, erythrocytic /// ankyrin 1, erythrocytic
207168_s_at	1388.03	1477.46	1.06444	0.0215125	H2AFY	NM_004893	H2A histone family, member Y
202487_s_at	819.953	872.618	1.06423	0.0174928	H2AFV	NM_012412	H2A histone family, member V
223001_at	450.687	479.573	1.06409	0.0316473	DC2	AF201937	DC2 protein
208662_s_at	1117.72	1189.06	1.06383	0.00661593	TTC3	AI885338	tetratricopeptide repeat domain 3
216028_at	322.587	343.1	1.06359	0.027055	---	AL049980	---
218153_at	685.768	729.357	1.06356	0.0179221	FLJ12118	NM_024537	hypothetical protein FLJ12118
211988_at	762.85	811.291	1.0635	0.0429876	SMARCE1	BG289800	SWI/SNF related, matrix associated, actin dependent regulator of chromatin, subfamily e, member 1
225168_at	337.642	358.945	1.06309	0.0496742	FRMD4A	T78406	FERM domain containing 4A
209115_at	542.649	576.828	1.06299	0.0166259	UBE1C	AL117566	ubiquitin-activating enzyme E1C (UBA3 homolog, yeast)
208960_s_at	298.645	317.45	1.06297	0.0342574	COPEB	BE675435	core promoter element binding protein
201799_s_at	662.446	704.153	1.06296	0.000748325	OSBP	AI927993	oxysterol binding protein
220966_x_at	1152.92	1225.49	1.06294	0.0285409	ARPC5L	NM_030978	actin related protein 2/3 complex, subunit 5-like /// actin related protein 2/3 complex, subunit 5-like
224634_at	426.397	453.22	1.0629	0.00543032	FLJ20249	AI911518	hypothetical protein FLJ20249
225256_at	483.934	514.29	1.06273	0.0058359	---	AI457965	Transcribed locus, weakly similar to NP_079012.2 gasdermin domain containing 1 [Homo sapiens]
205498_at	1243.32	1320.78	1.0623	0.049601	GHR	NM_000163	growth hormone receptor
200830_at	1767.08	1876.91	1.06215	0.0104475	PSMD2	NM_002808	proteasome (prosome, macropain) 26S subunit, non-ATPase, 2
222820_at	369.188	392.112	1.06209	0.0359246	KIAA1582	AW005818	KIAA1582 protein
211729_x_at	768.913	816.649	1.06208	0.024271	BLVRA	BC005902	biliverdin reductase A /// biliverdin reductase A
202169_s_at	839.312	891.417	1.06208	0.0492322	AASDHPPT	AF302110	aminoadipate-semialdehyde dehydrogenase-phosphopantetheinyl transferase
218229_s_at	304.566	323.439	1.06197	0.0218238	POGK	NM_017542	pogo transposable element with KRAB domain
227069_at	432.415	459.094	1.0617	0.0360743	---	AA806989	FP6778
226191_at	654.813	695.122	1.06156	0.0236176	GSK3B	AI431788	Glycogen synthase kinase 3 beta
213187_x_at	3092.22	3282.27	1.06146	0.0108865	FTL	BG538564	ferritin, light polypeptide
212145_at	978.92	1039.06	1.06144	0.0144903	MRPS27	D87453	mitochondrial ribosomal protein S27
201648_at	1298.13	1377.32	1.061	0.0493437	JAK1	AL039831	Janus kinase 1 (a protein tyrosine kinase)
226508_at	615.705	653.219	1.06093	0.0318664	PHC3	AI042019	Polyhomeotic like 3 (Drosophila)
212176_at	407.037	431.735	1.06068	0.0391542	C6orf111	AA902326	chromosome 6 open reading frame 111
210555_s_at	533.915	566.301	1.06066	0.0477481	NFATC3	U85430	nuclear factor of activated T-cells, cytoplasmic, calcineurin-dependent 3
225558_at	437.001	463.489	1.06061	0.0108236	GIT2	R38084	G protein-coupled receptor kinase interactor 2
226585_at	336.21	356.588	1.06061	0.0217371	NEIL2	BE466620	nei like 2 (E. coli)
200918_s_at	959.703	1017.73	1.06046	0.0204871	SRPR	NM_003139	signal recognition particle receptor ('docking protein')
225192_at	589.884	625.245	1.05995	0.0255905	C10orf46	AA044726	Chromosome 10 open reading frame 46
216308_x_at	985.157	1044.19	1.05992	0.0293182	GRHPR	AK026752	glyoxylate reductase/hydroxypyruvate reductase
225545_at	1532.24	1623.91	1.05983	0.0451802	EEF2K	BF001312	eukaryotic elongation factor-2 kinase
225419_at	304.278	322.479	1.05982	0.0223877	---	AI869704	---
216384_x_at	1079.59	1143.92	1.05959	0.0240892	---	AF257099	---
208073_x_at	1015.01	1075.18	1.05928	0.000214073	TTC3	NM_003316	tetratricopeptide repeat domain 3
217836_s_at	751.704	796.082	1.05904	0.0400965	YAP	NM_018253	YY1 associated protein
202151_s_at	2521	2669.79	1.05902	0.0420799	UBADC1	NM_016172	ubiquitin associated domain containing 1
229569_at	876.678	928.125	1.05868	0.0372967	---	AW572379	CDNA clone IMAGE:5263455, partial cds
1554239_s_at	549.601	581.82	1.05862	0.0386248	ZADH2	BC033780	zinc binding alcohol dehydrogenase, domain containing 2
218561_s_at	337.581	357.321	1.05847	0.0341444	C6orf149	NM_020408	chromosome 6 open reading frame 149
204020_at	864.513	914.808	1.05818	0.0367174	PURA	BF739943	purine-rich element binding protein A
203166_at	458.316	484.963	1.05814	0.0176177	CFDP1	NM_006324	craniofacial development protein 1
65630_at	355.319	375.962	1.0581	0.0105805	LOC283232	AI742455	hypothetical protein LOC283232
218366_x_at	480.051	507.891	1.05799	0.0213717	FLJ20859	NM_022734	FLJ20859 gene
208847_s_at	963.954	1019.83	1.05796	0.0125723	ADH5	M29872	alcohol dehydrogenase 5 (class III), chi polypeptide
221713_s_at	465.83	492.822	1.05794	0.0303628	FLJ12748	BC006434	hypothetical protein FLJ12748 /// hypothetical protein FLJ12748
208842_s_at	863.507	913.341	1.05771	0.000680577	GORASP2	W93787	golgi reassembly stacking protein 2, 55kDa
225179_at	751.182	794.158	1.05721	0.00881698	HIP2	AA161140	Huntingtin interacting protein 2
208642_s_at	1049.53	1109.56	1.0572	0.0353785	XRCC5	AA205834	X-ray repair complementing defective repair in Chinese hamster cells 5 (double-strand-break rejoining; Ku autoantigen, 80kDa)
218845_at	513.543	542.846	1.05706	0.0296907	DUSP22	NM_020185	dual specificity phosphatase 22
200960_x_at	811.391	857.529	1.05686	0.0229528	CLTA	NM_007096	clathrin, light polypeptide (Lca)
223283_s_at	433.852	458.493	1.0568	0.0271886	SDCCAG33	AF039698	serologically defined colon cancer antigen 33
210973_s_at	315.436	333.176	1.05624	0.0196486	FGFR1	M63889	fibroblast growth factor receptor 1 (fms-related tyrosine kinase 2, Pfeiffer syndrome)
205036_at	356.665	376.722	1.05624	0.00931326	LSM6	NM_007080	LSM6 homolog, U6 small nuclear RNA associated (S. cerevisiae)
212024_x_at	1243.75	1313.67	1.05622	0.0354597	FLII	U80184	flightless I homolog (Drosophila)
224648_at	350.347	369.998	1.05609	0.0166476	DKFZp761C169	AI860946	vasculin
205812_s_at	554.253	585.099	1.05565	0.0105126	HSGP25L2G	NM_006588	gp25L2 protein
200663_at	3160.05	3335.74	1.0556	0.0303179	CD63	NM_001780	CD63 antigen (melanoma 1 antigen)
201391_at	1254.13	1323.85	1.0556	0.0382892	TRAP1	NM_016292	TNF receptor-associated protein 1
218117_at	1631.67	1721.59	1.05511	0.019573	RBX1	NM_014248	ring-box 1
218462_at	675.854	712.976	1.05493	0.0293657	RPF1	NM_025065	RNA processing factor 1
201726_at	778.375	820.894	1.05463	0.0213801	ELAVL1	BC003376	ELAV (embryonic lethal, abnormal vision, Drosophila)-like 1 (Hu antigen R)
201347_x_at	1060.14	1117.28	1.0539	0.0486198	GRHPR	NM_012203	glyoxylate reductase/hydroxypyruvate reductase
208948_s_at	1232.92	1299.31	1.05384	0.0396263	STAU	BC000830	staufen, RNA binding protein (Drosophila)
215148_s_at	393.369	414.481	1.05367	0.000155283	APBA3	AI141541	amyloid beta (A4) precursor protein-binding, family A, member 3 (X11-like 2)
201593_s_at	777.771	819.466	1.05361	0.0291186	LEREPO4	AV716798	likely ortholog of mouse immediate early response, erythropoietin 4
202261_at	670.547	706.48	1.05359	0.0205408	TCFL1	NM_005997	transcription factor-like 1
213511_s_at	479.067	504.599	1.0533	0.0030851	MTMR1	AI167164	myotubularin related protein 1
212398_at	797.046	839.397	1.05314	0.0434054	RDX	AI057093	radixin
223114_at	881.355	928.135	1.05308	0.0434987	MGC4767	BC004916	hypothetical protein MGC4767
217819_at	719.085	756.986	1.05271	0.0486167	GOLGA7	NM_016099	golgi autoantigen, golgin subfamily a, 7
228890_at	303.624	319.625	1.0527	0.0492992	ATOH8	BF434995	atonal homolog 8 (Drosophila)
209080_x_at	552.013	580.785	1.05212	0.00911714	TXNL2	AF118652	thioredoxin-like 2
208639_x_at	567.949	597.344	1.05176	0.0447358	TXNDC7	BC001312	thioredoxin domain containing 7 (protein disulfide isomerase)
40189_at	1487.72	1564.72	1.05176	0.0472071	SET	M93651	SET translocation (myeloid leukemia-associated)
218006_s_at	354.423	372.765	1.05175	0.0181346	ZNF22	NM_006963	zinc finger protein 22 (KOX 15)
201883_s_at	395.509	415.934	1.05164	0.00225723	B4GALT1	D29805	UDP-Gal:betaGlcNAc beta 1,4- galactosyltransferase, polypeptide 1
224607_s_at	897.775	943.855	1.05133	0.0008997	SRP68	BG398597	signal recognition particle 68kDa
225234_at	388.538	408.467	1.05129	0.000902165	CBL	AV710415	Cas-Br-M (murine) ecotropic retroviral transforming sequence
200812_at	1727.38	1815.97	1.05128	0.00853966	CCT7	NM_006429	chaperonin containing TCP1, subunit 7 (eta)
201435_s_at	782.011	822.109	1.05128	0.019808	EIF4E	AW268640	eukaryotic translation initiation factor 4E
212368_at	311.882	327.839	1.05116	0.0336747	ZNF292	AA972711	zinc finger protein 292
217527_s_at	395.73	415.938	1.05106	0.0301696	FLJ14639	AI478300	nuclear factor of activated T-cells, cytoplasmic, calcineurin-dependent 2 interacting protein
204559_s_at	431.925	453.644	1.05028	0.0342113	LSM7	NM_016199	LSM7 homolog, U6 small nuclear RNA associated (S. cerevisiae)
214512_s_at	765.744	803.841	1.04975	0.0243787	PC4	NM_006713	activated RNA polymerase II transcription cofactor 4
218618_s_at	396.7	416.408	1.04968	0.0237766	FAD104	NM_022763	factor for adipocyte differentiation 104
222408_s_at	782.865	821.657	1.04955	0.0311786	YPEL5	BC000836	yippee-like 5 (Drosophila)
222165_x_at	332.966	349.44	1.04948	0.0281837	C9orf16	AK022885	chromosome 9 open reading frame 16
226685_at	412.039	432.326	1.04924	0.0331202	---	AI695684	---
207618_s_at	630.808	661.54	1.04872	0.0406672	BCS1L	NM_004328	BCS1-like (yeast)
212197_x_at	1172.38	1229.43	1.04867	0.00371867	M-RIP	AB020671	myosin phosphatase-Rho interacting protein
201795_at	334.154	350.367	1.04852	0.0375973	LBR	NM_002296	lamin B receptor
209945_s_at	298.493	312.893	1.04824	0.0262579	GSK3B	BC000251	glycogen synthase kinase 3 beta
200833_s_at	541.402	567.347	1.04792	0.0469018	RAP1B	NM_015646	RAP1B, member of RAS oncogene family
209123_at	1790.3	1875.07	1.04735	0.0360706	QDPR	BC000576	quinoid dihydropteridine reductase
201637_s_at	3698.98	3873.36	1.04714	0.0234525	FXR1	NM_005087	fragile X mental retardation, autosomal homolog 1
213491_x_at	759.611	795.39	1.0471	0.0418976	RPN2	AL514285	ribophorin II
226330_s_at	298.8	312.83	1.04695	0.0212772	FAM48A	BF739930	family with sequence similarity 48, member A
221753_at	401.241	419.989	1.04672	0.00786503	SSH1	AI651213	slingshot homolog 1 (Drosophila)
203103_s_at	635.475	665.111	1.04664	0.00657545	PRP19	NM_014502	PRP19/PSO4 homolog (S. cerevisiae)
229606_at	1829.1	1914.06	1.04645	0.043823	---	AI827550	---
218140_x_at	368.152	385.192	1.04629	0.0172533	SRPRB	NM_021203	signal recognition particle receptor, B subunit
225269_s_at	457.267	478.282	1.04596	0.0254097	C2orf12	BE384529	chromosome 2 open reading frame 12
211566_x_at	408.975	427.723	1.04584	0.0221556	BRE	U19178	brain and reproductive organ-expressed (TNFRSF1A modulator)
224878_at	984.519	1029.19	1.04538	0.0316101	UBPH	N63936	similar to ubiquitin binding protein
213801_x_at	4279.28	4473.35	1.04535	0.0382054	LAMR1	AW304232	laminin receptor 1 (ribosomal protein SA, 67kDa)
202926_at	501.008	523.612	1.04512	0.0102596	NAG	NM_015909	neuroblastoma-amplified protein
224656_s_at	1679.44	1755.16	1.04508	0.0476901	MTPN	AL533334	myotrophin
201523_x_at	772.033	806.756	1.04498	0.00704428	UBE2N	BE262760	ubiquitin-conjugating enzyme E2N (UBC13 homolog, yeast)
222469_s_at	333.45	348.443	1.04496	0.0303227	TOLLIP	AL136835	toll interacting protein
225679_at	874.012	913.179	1.04481	0.045169	C14orf35	AA534210	Chromosome 14 open reading frame 35
207668_x_at	561.201	586.333	1.04478	0.0494932	TXNDC7	NM_005742	thioredoxin domain containing 7 (protein disulfide isomerase)
201274_at	860.739	899.212	1.0447	0.0172176	PSMA5	NM_002790	proteasome (prosome, macropain) subunit, alpha type, 5
207643_s_at	490.32	512.169	1.04456	0.0433005	TNFRSF1A	NM_001065	tumor necrosis factor receptor superfamily, member 1A
210967_x_at	2494.67	2605.01	1.04423	0.0362127	CACNB1	M92301	calcium channel, voltage-dependent, beta 1 subunit
214771_x_at	1071.72	1119.04	1.04415	0.0473647	M-RIP	AK025604	myosin phosphatase-Rho interacting protein
226024_at	587.259	613.183	1.04415	0.0144971	COMMD1	BG481459	copper metabolism (Murr1) domain containing 1
204089_x_at	446.423	465.924	1.04368	0.00100416	MAP3K4	NM_006724	mitogen-activated protein kinase kinase kinase 4
225808_at	497.899	519.605	1.0436	0.0472637	LOC124512	AA883486	hypothetical protein LOC124512
224395_s_at	1335.76	1392.81	1.04271	0.024715	RNF7	AF312226	ring finger protein 7 /// ring finger protein 7
1554542_at	587.053	611.911	1.04234	0.0344756	LOC153328	BC025747	similar to CG4995 gene product
226091_s_at	4191.93	4367.85	1.04197	0.00909687	PGR1	BG435643	protein associated with MRG, 14 kDa
201234_at	1080.76	1125.7	1.04159	0.0383039	ILK	NM_004517	integrin-linked kinase
41160_at	1168.66	1216.84	1.04122	0.0131351	MBD3	AC005943	methyl-CpG binding domain protein 3
218034_at	2188	2278.11	1.04118	0.0384131	TTC11	NM_016068	tetratricopeptide repeat domain 11
215841_at	450.204	468.639	1.04095	0.0361764	GUCA1B	AL096814	guanylate cyclase activator 1B (retina)
1563458_at	529.117	550.682	1.04076	0.0356564	PARVA	AL832682	parvin, alpha
218209_s_at	489.334	509.052	1.0403	0.0204959	P15RS	NM_018170	hypothetical protein FLJ10656
212189_s_at	589.263	612.585	1.03958	0.0224138	COG4	AK022874	component of oligomeric golgi complex 4
241921_x_at	375.744	390.491	1.03925	0.0394144	---	AW015517	---
227273_at	314.358	326.626	1.03903	0.0378977	---	AI126798	---
214118_x_at	1668.01	1732.67	1.03877	0.0268493	PCM1	AI205598	pericentriolar material 1
209143_s_at	698.214	725.216	1.03867	0.0254726	CLNS1A	AF005422	chloride channel, nucleotide-sensitive, 1A
222503_s_at	401.169	416.644	1.03857	0.048395	WDR41	BF593261	WD repeat domain 41
212303_x_at	740.791	768.486	1.03739	0.0388586	KHSRP	BG026366	KH-type splicing regulatory protein (FUSE binding protein 2)
200651_at	6056.99	6283.09	1.03733	0.0236208	GNB2L1	NM_006098	guanine nucleotide binding protein (G protein), beta polypeptide 2-like 1
200082_s_at	4362.47	4524.72	1.03719	0.0486328	RPS7	AI805587	ribosomal protein S7 /// ribosomal protein S7
207186_s_at	619.199	641.742	1.03641	0.0432107	FALZ	NM_004459	fetal Alzheimer antigen
200936_at	5891.85	6105.34	1.03623	0.0257271	RPL8	NM_000973	ribosomal protein L8
211505_s_at	826.663	856.501	1.03609	0.0475425	STAU	AL136601	staufen, RNA binding protein (Drosophila)
218088_s_at	437.512	453.123	1.03568	0.0082288	RRAGC	NM_022157	Ras-related GTP binding C
203462_x_at	955.435	988.794	1.03492	0.0159619	EIF3S9	NM_003751	eukaryotic translation initiation factor 3, subunit 9 eta, 116kDa
226049_at	310.296	321.032	1.0346	0.0380388	---	AI271420	CDNA FLJ31750 fis, clone NT2RI2007406
1554149_at	437.224	452.127	1.03408	0.0472171	C3orf4	BC013610	chromosome 3 open reading frame 4
200064_at	5546.5	5734.87	1.03396	0.0478071	HSPCB	AF275719	heat shock 90kDa protein 1, beta /// heat shock 90kDa protein 1, beta
203173_s_at	385.68	398.366	1.03289	0.0331564	MGC16824	AW080196	esophageal cancer associated protein
218050_at	583.585	602.358	1.03217	0.0290081	Ufm1	NM_016617	ubiquitin-fold modifier 1
201480_s_at	652.498	673.418	1.03206	0.0219319	SUPT5H	NM_003169	suppressor of Ty 5 homolog (S. cerevisiae)
206788_s_at	446	459.832	1.03102	0.0495021	CBFB	AF294326	core-binding factor, beta subunit
217722_s_at	3763.87	3878.95	1.03058	0.0471969	NEUGRIN	NM_016645	mesenchymal stem cell protein DSC92
201499_s_at	1070.01	1102.66	1.03051	0.0323258	USP7	NM_003470	ubiquitin specific protease 7 (herpes virus-associated)
201405_s_at	1408.87	1449.67	1.02896	0.0264335	COPS6	NM_006833	COP9 constitutive photomorphogenic homolog subunit 6 (Arabidopsis)
201478_s_at	372.404	382.748	1.02778	0.0399615	DKC1	U59151	dyskeratosis congenita 1, dyskerin
205750_at	359.391	368.457	1.02523	0.0456668	BPHL	NM_004332	biphenyl hydrolase-like (serine hydrolase; breast epithelial mucin-associated antigen)
227582_at	326.005	334.1	1.02483	0.00485781	KARCA1	AW079843	kelch/ankyrin repeat containing cyclin A1 interacting protein
208689_s_at	688.092	703.663	1.02263	0.0211641	RPN2	BC003560	ribophorin II
212391_x_at	10091.4	10313.5	1.02202	0.0152963	RPS3A	AI925635	ribosomal protein S3A
204524_at	446.285	455.658	1.021	0.0490593	PDPK1	NM_002613	3-phosphoinositide dependent protein kinase-1
65086_at	560.795	551.583	0.983574	0.0419269	MGC3262	Z78349	hypothetical protein MGC3262
1559713_at	747.435	734.677	0.982931	0.0427717	---	BC017173	CDNA clone IMAGE:3162229, partial cds
213105_s_at	488.014	478.579	0.980667	0.0435919	MGC24381	AI799802	hypothetical protein MGC24381
221378_at	362.003	354.451	0.979138	0.030041	CER1	NM_005454	cerberus 1 homolog, cysteine knot superfamily (Xenopus laevis)
1562232_at	386.34	377.877	0.978092	0.0199673	---	AL833559	---
204600_at	454.443	444.281	0.977639	0.0280523	EPHB3	NM_004443	EPH receptor B3
233101_at	342.276	334.489	0.977249	0.049894	MTMR9	AK022071	myotubularin related protein 9
231602_at	354.196	346.039	0.97697	0.0427822	---	AI809150	---
224680_at	460.552	448.846	0.974583	0.0060585	HNLF	AL539253	putative NFkB activating protein HNLF
221004_s_at	474.98	462.78	0.974314	0.0355486	ITM2C	NM_030926	integral membrane protein 2C /// integral membrane protein 2C
232470_at	436.244	424.817	0.973805	0.0481483	SNF1LK	AP001751	SNF1-like kinase
218920_at	525.517	511.387	0.973113	0.0496234	FLJ10404	NM_019057	hypothetical protein FLJ10404
205482_x_at	373.754	363.697	0.973092	0.0439981	SNX15	NM_013306	sorting nexin 15
220341_s_at	420.317	409.007	0.973091	0.0279751	LOC51149	NM_016175	truncated calcium binding protein
35160_at	319.485	310.78	0.972753	0.018574	LDB1	AF064491	LIM domain binding 1
206313_at	322.938	314.082	0.972579	0.0308322	HLA-DOA	NM_002119	major histocompatibility complex, class II, DO alpha
218622_at	376.959	366.589	0.972491	0.0382053	NUP37	NM_024057	nucleoporin 37kDa
236594_at	503.548	489.569	0.972239	0.0103002	LLGL1	AI570526	lethal giant larvae homolog 1 (Drosophila)
213091_at	600.252	583.505	0.972099	0.0371235	MECT1	AB014516	mucoepidermoid carcinoma translocated 1
201415_at	309.616	300.713	0.971243	0.0318293	GSS	NM_000178	glutathione synthetase
209467_s_at	763.089	740.825	0.970824	0.0278632	MKNK1	BC002755	MAP kinase interacting serine/threonine kinase 1
209680_s_at	435.467	422.729	0.970751	0.032488	KIFC1	BC000712	Kinesin family member C1
237042_at	310.944	301.755	0.970448	0.0397035	---	AA902297	---
1560911_at	408.381	396.265	0.970332	0.0317956	---	BC042381	Homo sapiens, clone IMAGE:5302720, mRNA
232590_at	319.522	309.981	0.97014	0.0467713	HADHA	AK025919	Hydroxyacyl-Coenzyme A dehydrogenase/3-ketoacyl-Coenzyme A thiolase/enoyl-Coenzyme A hydratase (trifunctional protein), alpha subunit
224887_at	454.325	440.671	0.969948	0.0304541	GNPTG	AF302786	N-acetylglucosamine-1-phosphotransferase, gamma subunit
228544_s_at	463.478	449.474	0.969786	0.0354843	CSRP2BP	AA780252	CSRP2 binding protein
228270_at	401.915	389.528	0.96918	0.0215694	DKFZp547K054	BE220037	Hypothetical protein DKFZp547K054
217055_x_at	397.157	384.913	0.969172	0.0151102	---	S83374	---
1554379_a_at	414.491	401.664	0.969054	0.0415795	TP73	AB055066	tumor protein p73
202297_s_at	533.167	516.611	0.968947	0.0485977	RER1	AF157324	RER1 homolog (S. cerevisiae)
210043_at	361.855	350.564	0.968797	0.0425825	FKSG44	AF334946	FKSG44 gene
225608_at	348.83	337.923	0.968732	0.0252551	LOC92017	H15273	similar to RIKEN cDNA 4933437K13
202750_s_at	442.77	428.843	0.968546	0.00755864	TFIP11	AL080147	tuftelin interacting protein 11
230842_at	353.963	342.535	0.967714	0.00786208	---	AI807481	---
222200_s_at	346.52	335.256	0.967494	0.019523	FLJ10276	AK021440	hypothetical protein FLJ10276
216224_s_at	404.154	390.998	0.967448	0.0458414	HDAC6	AK024083	histone deacetylase 6
57532_at	346.709	335.285	0.967048	0.0209608	DVL2	AW016304	dishevelled, dsh homolog 2 (Drosophila)
201770_at	506.523	489.798	0.966981	0.0423372	SNRPA	NM_004596	small nuclear ribonucleoprotein polypeptide A
226286_at	405.589	392.165	0.966902	0.0435892	RBED1	AI686411	RNA binding motif and ELMO domain 1
228379_at	575.215	556.134	0.966828	0.0324207	NUTF2	AW071847	Nuclear transport factor 2
226361_at	473.65	457.897	0.966743	0.0174249	MGC29956	BF056095	hypothetical protein MGC29956
240774_at	387.231	374.326	0.966671	0.0112541	---	AI692536	---
209777_s_at	305.767	295.555	0.966602	0.0453239	SLC19A1	AF004354	solute carrier family 19 (folate transporter), member 1
207129_at	321.547	310.739	0.966389	0.0194019	CA5B	NM_007220	carbonic anhydrase VB, mitochondrial
203834_s_at	414.594	400.604	0.966256	0.0394204	TGOLN2	NM_006464	trans-golgi network protein 2
213773_x_at	977.953	944.893	0.966194	0.0283348	WBSCR20A	AW248552	Williams Beuren syndrome chromosome region 20A
232062_at	454.769	439.319	0.966027	0.0261038	ADCY1	AK024415	adenylate cyclase 1 (brain)
227841_at	382.048	368.983	0.965803	0.00919548	---	BG260181	---
206672_at	400.039	386.321	0.965708	0.0288003	AQP2	NM_000486	aquaporin 2 (collecting duct)
226212_s_at	307.219	296.676	0.965683	0.0440688	INSR	AV726689	Insulin receptor
224825_at	621.203	599.885	0.965682	0.00730607	DNTTIP1	AL050348	deoxynucleotidyltransferase, terminal, interacting protein 1
231831_at	369.808	356.983	0.96532	0.00836833	LOC90639	AU153267	hypothetical protein LOC90639
65770_at	860.515	830.549	0.965177	0.0114917	RHOT2	AI186666	ras homolog gene family, member T2
229677_at	427.263	412.295	0.964967	0.032392	SLC39A3	AA535975	solute carrier family 39 (zinc transporter), member 3
243429_at	500.83	483.14	0.964677	0.0377412	---	BE645588	---
217754_at	346.62	334.371	0.964661	0.00594098	DDX56	NM_019082	DEAD (Asp-Glu-Ala-Asp) box polypeptide 56
202831_at	350.159	337.777	0.964638	0.044281	GPX2	NM_002083	glutathione peroxidase 2 (gastrointestinal)
211266_s_at	348.343	335.931	0.964367	0.0363297	GPR4	U35399	G protein-coupled receptor 4
1556852_a_at	441.872	426.098	0.964304	0.0372657	---	BE222476	CDNA FLJ33171 fis, clone ADRGL2000644
210028_s_at	529.338	510.202	0.96385	0.0272483	ORC3L	AF125507	origin recognition complex, subunit 3-like (yeast)
218759_at	383.413	369.548	0.963838	0.0159206	DVL2	NM_004422	dishevelled, dsh homolog 2 (Drosophila)
241243_at	307.874	296.691	0.963677	0.0426768	---	AA702994	---
226810_at	401.073	386.473	0.963596	0.010974	---	BE500942	MRNA full length insert cDNA clone EUROIMAGE 1509279
213842_x_at	962.761	927.523	0.963399	0.0200077	WBSCR20C	AK021688	Williams Beuren syndrome chromosome region 20C
1555751_a_at	397.565	382.958	0.963259	0.00668143	GEMIN7	AY114106	gem (nuclear organelle) associated protein 7
203325_s_at	386.609	372.34	0.963092	0.0334277	COL5A1	AI130969	collagen, type V, alpha 1
223111_x_at	790.63	761.427	0.963063	0.00709933	ARID4B	BF058966	AT rich interactive domain 4B (RBP1- like)
231619_at	625.459	602.214	0.962835	0.0278346	---	AI732900	---
202264_s_at	521.773	502.352	0.96278	0.0340282	TOMM40	NM_006114	translocase of outer mitochondrial membrane 40 homolog (yeast)
238544_at	359.257	345.778	0.962483	0.0273686	---	AA618295	---
218569_s_at	470.213	452.57	0.96248	0.0227672	KBTBD4	NM_018095	kelch repeat and BTB (POZ) domain containing 4
230154_at	306.295	294.795	0.962456	0.0246045	---	AW003119	---
1553166_at	487.492	469.061	0.962191	0.0229167	CDH24	NM_144985	cadherin-like 24
221585_at	408.883	393.416	0.962173	0.00696128	CACNG4	BC004504	calcium channel, voltage-dependent, gamma subunit 4
220143_x_at	356.385	342.904	0.962173	0.025522	LUC7L	NM_018032	LUC7-like (S. cerevisiae)
223847_s_at	962.025	925.527	0.962062	0.041549	KIAA1181	AF267855	endoplasmic reticulum-golgi intermediate compartment 32 kDa protein
209078_s_at	813.698	782.737	0.961951	0.0216285	TXN2	AF276920	thioredoxin 2
1558119_at	340.99	327.949	0.961757	0.0479991	TM4SF17	BG769410	transmembrane 4 superfamily member 17
222573_s_at	388.105	373.193	0.961579	0.0249493	SAV1	AI679398	salvador homolog 1 (Drosophila)
237455_at	320.627	308.247	0.961387	0.00131221	---	BF436704	---
237393_at	427.538	410.982	0.961275	0.029883	---	AW083054	Similar to trophoblast glycoprotein
212866_at	448.027	430.579	0.961056	0.04895	LOC203069	AI081543	Hypothetical protein LOC203069
206679_at	499.427	479.766	0.960633	0.0322419	APBA1	NM_001163	amyloid beta (A4) precursor protein-binding, family A, member 1 (X11)
206093_x_at	713.818	685.651	0.960541	0.0285001	TNXB	NM_007116	tenascin XB
221709_s_at	389.014	373.644	0.960492	0.032421	C14orf131	BC006222	chromosome 14 open reading frame 131 /// chromosome 14 open reading frame 131
218734_at	315.364	302.876	0.960401	0.0121571	FLJ13848	NM_024771	hypothetical protein FLJ13848
241577_at	395.071	379.34	0.960181	0.00222306	---	AI732794	---
209808_x_at	307.038	294.664	0.959699	0.0175191	ING1	AW193656	inhibitor of growth family, member 1
1553992_s_at	363.615	348.867	0.959441	0.0447108	NBR2	BC034248	neighbor of BRCA1 gene 2
244366_at	387.728	371.986	0.959401	0.0420867	---	AA758547	---
224485_s_at	308.538	295.993	0.959341	0.0419283	SLC30A2	BC006251	solute carrier family 30 (zinc transporter), member 2 /// solute carrier family 30 (zinc transporter), member 2
216143_at	395.472	379.388	0.95933	0.0454628	---	AL137403	---
220879_at	462.65	443.726	0.959097	0.00540167	---	NM_018600	---
204553_x_at	347.81	333.569	0.959057	0.0482911	INPP4A	NM_004027	inositol polyphosphate-4-phosphatase, type I, 107kDa
235054_at	319.319	306.196	0.958901	0.0442279	FLJ31265	BF941983	hypothetical protein FLJ31265
1554937_x_at	375.88	360.396	0.958806	0.0416782	LOC283849	BC034287	hypothetical protein LOC283849
202841_x_at	747.749	716.913	0.958761	0.0194237	OGFR	NM_007346	opioid growth factor receptor
217303_s_at	318.805	305.582	0.958526	0.0291679	ADRB3	X70812	adrenergic, beta-3-, receptor
206971_at	338.271	324.173	0.958322	0.0204386	GPR161	NM_007369	G protein-coupled receptor 161
227676_at	445.498	426.872	0.95819	0.0189979	FAM3D	AW001287	family with sequence similarity 3, member D
204394_at	396.556	379.927	0.958067	0.0208732	SLC43A1	NM_003627	solute carrier family 43, member 1
216689_x_at	402.856	385.956	0.958048	0.0401874	ARHGAP1	U62794	Rho GTPase activating protein 1
227052_at	399.292	382.54	0.958045	0.0088579	LOC201895	AI810669	Hypothetical protein LOC201895
235815_at	540.324	517.639	0.958016	0.0206559	C20orf17	BE222470	Chromosome 20 open reading frame 17
218690_at	433.993	415.663	0.957764	0.0133787	---	NM_003687	---
214635_at	410.366	392.988	0.957651	0.0212642	CLDN9	AI701514	claudin 9
1569383_s_at	311.045	297.87	0.957644	0.00838663	ZFYVE28	BC032605	zinc finger, FYVE domain containing 28
209346_s_at	597.873	572.517	0.957589	0.0196421	PI4KII	BC003167	phosphatidylinositol 4-kinase type II
213215_at	830.269	794.735	0.957202	0.0459185	AP3S2	AI910895	Adaptor-related protein complex 3, sigma 2 subunit
223413_s_at	384.95	368.428	0.957081	0.0105054	LYAR	AW958593	hypothetical protein FLJ20425
226445_s_at	465.986	445.877	0.956847	0.03046	TRIM41	AI743109	tripartite motif-containing 41
230385_at	422.794	404.529	0.956801	0.00530359	LOC153277	BF510835	hypothetical protein LOC153277
1558211_s_at	363.442	347.648	0.956543	0.0435141	SRC	BG767702	v-src sarcoma (Schmidt-Ruppin A-2) viral oncogene homolog (avian)
200661_at	558.301	533.965	0.956411	0.0212805	PPGB	NM_000308	protective protein for beta-galactosidase (galactosialidosis)
213893_x_at	501.259	479.407	0.956407	0.0323997	PMS2L5	AA161026	postmeiotic segregation increased 2-like 5
210177_at	373.819	357.495	0.956332	0.0201616	TRIM15	U34249	tripartite motif-containing 15
223470_at	341.941	326.929	0.956098	0.0180188	PIGM	AB028127	phosphatidylinositol glycan, class M
228486_at	307.189	293.702	0.956093	0.0108403	CDW92	AW165999	CDW92 antigen
206560_s_at	308.1	294.567	0.956077	0.0325822	MIA	NM_006533	melanoma inhibitory activity
213178_s_at	699.522	668.784	0.956058	0.0471292	MAPK8IP3	AB028989	mitogen-activated protein kinase 8 interacting protein 3
1553959_a_at	466.811	446.268	0.955993	0.0235566	B3GALT6	N95564	UDP-Gal:betaGal beta 1,3-galactosyltransferase polypeptide 6
208541_x_at	344.849	329.658	0.955951	0.0263785	TFAM	NM_012251	transcription factor A, mitochondrial
222613_at	412.205	394.046	0.955947	0.00749344	C12orf4	AA195410	chromosome 12 open reading frame 4
213529_at	476.188	455.16	0.95584	0.0462274	LOC146542	AI350500	similar to hypothetical protein MGC13138
223726_at	477.89	456.736	0.955734	0.00851782	KCNH3	AB022696	potassium voltage-gated channel, subfamily H (eag-related), member 3
203436_at	542.343	518.322	0.95571	0.0241485	RPP30	NM_006413	ribonuclease P/MRP 30kDa subunit
236159_x_at	307.025	293.409	0.955653	0.026375	---	AW293000	---
233968_at	364.991	348.8	0.955641	0.0377995	CST11	AL096677	cystatin 11
207990_x_at	346.361	330.985	0.955608	0.0142859	ACRV1	NM_020114	acrosomal vesicle protein 1
1556982_at	499.091	476.92	0.955576	0.0093573	MART2	AF085900	Melanoma antigen recognized by T cells 2
205061_s_at	459.633	439.161	0.95546	0.00656765	EXOSC9	NM_005033	exosome component 9
226351_at	355.89	340.01	0.955379	0.0264415	NSUN4	AK021577	NOL1/NOP2/Sun domain family 4
231481_at	344.04	328.673	0.955333	0.0189781	CCNB3	AI003521	cyclin B3
220739_s_at	348.924	333.296	0.955213	0.00731039	CNNM3	NM_017623	cyclin M3
233918_at	478.801	457.286	0.955065	0.0430402	LOC149069	AI924786	hypothetical protein LOC149069
220041_at	644.518	615.491	0.954964	0.0153179	SMP3	NM_025163	SMP3 mannosyltransferase
231222_at	307.884	294.016	0.954955	0.0313884	---	AW170343	---
233563_s_at	387.271	369.784	0.954847	0.029789	FLJ20542	AK023356	hypothetical protein FLJ20542
220203_at	336.3	321.065	0.954699	0.00690765	FLJ14351	NM_024732	hypothetical protein FLJ14351
203162_s_at	338.779	323.431	0.954694	0.0304734	KATNB1	NM_005886	katanin p80 (WD repeat containing) subunit B 1
1560878_at	1221.1	1165.7	0.954634	0.0418516	SYT15	AI971263	synaptotagmin XV
238351_x_at	308.474	294.478	0.954628	0.0171782	---	AI792565	---
210056_at	318.628	304.142	0.954537	0.0365671	RND1	U69563	Rho family GTPase 1
231497_at	334.886	319.582	0.954301	0.0185914	---	AW003006	Transcribed locus, weakly similar to XP_375099.1 hypothetical protein LOC283585 [Homo sapiens]
224527_at	323.537	308.717	0.954192	0.0234741	CDH23	AF312024	cadherin-like 23
225854_x_at	367.596	350.743	0.954152	0.0152169	IRF2BP2	W73718	Interferon regulatory factor 2 binding protein 2
211296_x_at	14937.4	14249.4	0.953944	0.00921089	UBC	AB009010	ubiquitin C
1569728_at	323.407	308.466	0.953799	0.0433479	---	BC024029	---
207491_at	399.899	381.389	0.953711	0.0064375	MOGAT2	NM_025098	monoacylglycerol O-acyltransferase 2
210536_s_at	381.846	364.114	0.953564	0.0205929	SPAM1	S67798	sperm adhesion molecule 1 (PH-20 hyaluronidase, zona pellucida binding)
202851_at	315.261	300.604	0.953509	0.0406063	FLJ11506	AL136715	hypothetical protein FLJ11506
242873_at	352.221	335.737	0.953197	0.0054605	---	BE567130	---
217863_at	322.792	307.684	0.953195	0.0377237	PIAS1	AI348378	protein inhibitor of activated STAT, 1
202991_at	386.554	368.37	0.95296	0.0046989	STARD3	NM_006804	START domain containing 3
230968_at	308.065	293.54	0.952853	0.0368658	---	AW953794	---
226536_at	969.24	923.453	0.95276	0.0462694	FLJ32440	AL562908	hypothetical protein FLJ32440
232548_at	324.378	309.051	0.95275	0.0377326	GALNTL1	AI168299	UDP-N-acetyl-alpha-D-galactosamine:polypeptide N-acetylgalactosaminyltransferase-like 1
241827_at	542.497	516.767	0.952571	0.0437297	ZNF615	AL577866	zinc finger protein 615
230322_at	349.577	332.945	0.952425	0.049654	NFAM1	AI492017	NFAT activation molecule 1
204436_at	466.151	443.962	0.952399	0.0390167	pp9099	NM_025201	PH domain-containing protein
202943_s_at	366.252	348.784	0.952305	0.0110323	NAGA	M38083	N-acetylgalactosaminidase, alpha-
1554566_at	596.604	568.14	0.95229	0.0147104	FLJ12242	BC009961	hypothetical protein FLJ12242
223127_s_at	445.961	424.624	0.952154	0.0467647	C1orf21	AW003850	chromosome 1 open reading frame 21
201749_at	430.428	409.804	0.952084	0.0250047	ECE1	BF969352	Endothelin converting enzyme 1
223684_s_at	337.628	321.429	0.95202	0.00702627	SMUG1	BC000417	single-strand selective monofunctional uracil DNA glycosylase
1554659_at	419.67	399.522	0.951991	0.0203514	---	BC037286	---
207330_at	384.45	365.963	0.951913	0.0097244	PZP	NM_002864	pregnancy-zone protein
244043_at	324.628	308.988	0.951823	0.0250769	TFDP2	AI049624	Transcription factor Dp-2 (E2F dimerization partner 2)
212485_at	404.255	384.736	0.951717	0.0417483	KIAA0553	AU146596	KIAA0553 protein
222561_at	498.199	474.129	0.951685	0.022215	LANCL2	AJ278245	LanC lantibiotic synthetase component C-like 2 (bacterial)
208930_s_at	373.775	355.707	0.951661	0.0246086	ILF3	BG032366	interleukin enhancer binding factor 3, 90kDa
232491_at	379.873	361.498	0.951627	0.0176663	---	AK026403	---
244309_at	495.505	471.509	0.951572	0.0161313	---	AA426056	---
228727_at	470.397	447.593	0.951523	0.0129375	---	BF969970	---
225812_at	384.459	365.733	0.951293	0.0168769	---	N36759	Transcribed locus, moderately similar to NP_899077.1 RIKEN cDNA 1700025K23 gene [Mus musculus]
204771_s_at	352.767	335.579	0.951277	0.0204807	TTF1	AI632304	transcription termination factor, RNA polymerase I
219521_at	334.598	318.275	0.951218	0.0476675	B3GAT1	NM_018644	beta-1,3-glucuronyltransferase 1 (glucuronosyltransferase P)
219125_s_at	353.326	336.062	0.951139	0.023237	LOC55974	NM_018845	stromal cell protein
228228_at	599.939	570.617	0.951125	0.0487914	MGC15476	AI809234	thymus expressed gene 3-like
219729_at	419.661	399.15	0.951124	0.0346845	PRRX2	NM_016307	paired related homeobox 2
205592_at	458.115	435.682	0.951032	0.0170034	SLC4A1	X77737	Solute carrier family 4, anion exchanger, member 1 (erythrocyte membrane protein band 3, Diego blood group)
231642_at	308.414	293.295	0.95098	0.0474734	C6orf201	AI208802	chromosome 6 open reading frame 201
218616_at	338.028	321.412	0.950844	0.0176911	LOC57117	NM_020395	hypothetical nuclear factor SBBI22
234316_x_at	356.135	338.619	0.950816	0.000170805	KLK12	AF135025	kallikrein 12
1557817_a_at	360.723	342.959	0.950753	0.0350905	---	AF161366	HSPC103
212978_at	383.444	364.557	0.950743	0.0304665	TA-LRRP	AU146004	T-cell activation leucine repeat-rich protein
1554962_a_at	337.226	320.562	0.950586	0.0251126	FGFR4	AF359241	fibroblast growth factor receptor 4
49049_at	467.357	444.235	0.950525	0.00154864	DTX3	N92708	deltex 3 homolog (Drosophila)
238201_at	554.101	526.646	0.950451	0.0333556	---	AI377809	---
211398_at	352.895	335.38	0.950366	0.0456603	FGFR2	AB030075	fibroblast growth factor receptor 2 (bacteria-expressed kinase, keratinocyte growth factor receptor, craniofacial dysostosis 1, Crouzon syndrome, Pfeiffer syndrome, Jackson-Weiss syndrome)
234922_s_at	449.366	427.015	0.950262	0.0144417	NHSL1	AK000699	NHS-like 1
239073_at	348.627	331.256	0.950172	0.0456762	---	AI796043	---
225014_at	1203.46	1143.46	0.950144	0.0343467	LOC389203	BF508958	Hypothetical gene supported by BC032431
226797_at	312.436	296.832	0.950059	0.027929	MBTD1	AL133577	Mbt domain containing 1
228897_at	359.312	341.358	0.950034	0.0110818	DERL3	AI005676	Der1-like domain family, member 3
203514_at	982.977	933.851	0.950023	0.0384679	MAP3K3	BF971923	mitogen-activated protein kinase kinase kinase 3
209558_s_at	311.332	295.767	0.950005	0.0433362	HIP1R	AB013384	huntingtin interacting protein-1-related
211322_s_at	328.359	311.925	0.94995	0.0443694	SARDH	AF047004	sarcosine dehydrogenase
1570344_at	326.031	309.708	0.949934	0.0486704	---	BG772870	---
218619_s_at	375.044	356.26	0.949914	0.0169154	SUV39H1	NM_003173	suppressor of variegation 3-9 homolog 1 (Drosophila)
207356_at	366.066	347.654	0.949704	0.00742477	DEFB4	NM_004942	defensin, beta 4
202062_s_at	351.263	333.583	0.949668	0.0416168	SEL1L	NM_005065	sel-1 suppressor of lin-12-like (C. elegans)
232666_at	321.719	305.473	0.949503	0.00759575	OAS3	R13458	2'-5'-oligoadenylate synthetase 3, 100kDa
216680_s_at	431.082	409.294	0.949456	0.0483674	EPHB4	BC004264	EPH receptor B4
208332_at	314.753	298.821	0.94938	0.0229848	PRY	NM_004676	PTPN13-like, Y-linked
240806_at	321.079	304.822	0.949366	0.00859826	---	AI939308	CDNA FLJ30939 fis, clone FEBRA2007414
226842_at	431.638	409.761	0.949316	0.0352692	LOC90110	AV694039	hypothetical protein LOC90110
203532_x_at	481.925	457.452	0.949218	0.0396223	CUL5	AF017061	cullin 5
1561243_at	732.614	695.31	0.949081	0.0393716	FLJ38792	AK096111	hypothetical protein FLJ38792
216606_x_at	496.878	471.543	0.949013	0.0405697	LYPLA2P1	AL050332	lysophospholipase II pseudogene 1
232480_at	343.815	326.274	0.94898	0.0241637	FLJ27365	AA758934	FLJ27365 protein
232214_x_at	557.886	529.366	0.94888	0.0371287	ZNF554	BC000113	zinc finger protein 554
1560785_at	338.897	321.537	0.948776	0.0418936	DYRK3	BC037269	dual-specificity tyrosine-(Y)-phosphorylation regulated kinase 3
211402_x_at	461.242	437.541	0.948615	0.0210854	NR6A1	AF004291	nuclear receptor subfamily 6, group A, member 1
202624_s_at	454.166	430.809	0.948572	0.0216935	CABIN1	NM_012295	calcineurin binding protein 1
211053_at	386.32	366.444	0.94855	0.03479	KCNG1	BC006367	potassium voltage-gated channel, subfamily G, member 1 /// potassium voltage-gated channel, subfamily G, member 1
241286_at	494.361	468.92	0.948536	0.0262847	---	AI022061	---
231317_at	365.674	346.839	0.948493	0.0320303	---	AI741779	---
1553619_a_at	330.634	313.596	0.948468	0.0408317	TRIM43	NM_138800	tripartite motif-containing 43
202867_s_at	429.829	407.676	0.948463	0.0339798	DNAJB12	NM_017626	DnaJ (Hsp40) homolog, subfamily B, member 12
209592_s_at	348.479	330.434	0.94822	0.0109853	HAN11	BC001264	WD-repeat protein
1563489_at	308.73	292.724	0.948154	0.0127892	LOC285638	AL833206	hypothetical protein LOC285638
231974_at	645.694	612.154	0.948055	0.0246579	MLL2	AI742164	Myeloid/lymphoid or mixed-lineage leukemia 2
234969_s_at	675.475	640.374	0.948034	0.0394606	---	AK024117	---
215121_x_at	338.061	320.462	0.947942	0.0226523	IGLC2	AA680302	immunoglobulin lambda constant 2 (Kern-Oz- marker)
220603_s_at	310.252	294.1	0.947939	0.0262686	MCTP2	NM_018349	multiple C2-domains with two transmembrane regions 2
225277_at	486.526	461.186	0.947917	0.0234379	SLC39A13	AL525780	solute carrier family 39 (zinc transporter), member 13
220307_at	322.455	305.659	0.947913	0.0428874	CD244	NM_016382	CD244 natural killer cell receptor 2B4
1569294_at	517.707	490.73	0.947891	0.00614721	LOC149603	BC015435	Hypothetical protein LOC149603
243160_at	579.437	549.223	0.947856	0.0248593	---	N92818	---
209478_at	494.285	468.505	0.947844	0.0107006	---	U95006	---
208516_at	334.485	317.029	0.94781	0.0273984	MTNR1B	NM_005959	melatonin receptor 1B
229806_at	359.619	340.837	0.947771	0.0313048	---	AI304951	---
218795_at	617.873	585.557	0.947698	0.0339869	ACP6	NM_016361	acid phosphatase 6, lysophosphatidic
215590_x_at	429.466	406.832	0.947298	0.0387237	---	AK025619	CDNA: FLJ21966 fis, clone HEP05644
1552395_at	382.002	361.865	0.947286	0.0340205	STK22C	NM_052841	serine/threonine kinase 22C (spermiogenesis associated)
229267_at	728.915	690.461	0.947244	0.00647106	---	AW205749	---
218141_at	383.296	363.039	0.947152	0.0185347	E2-230K	NM_022066	likely ortholog of mouse ubiquitin-conjugating enzyme E2-230K
1562577_at	371.223	351.532	0.946958	0.00035508	---	BC025331	Homo sapiens, clone IMAGE:4546564, mRNA
40829_at	1700.55	1610.28	0.946914	0.0267558	WDTC1	AB028960	WD and tetratricopeptide repeats 1
218921_at	323.337	306.151	0.946848	0.0168123	SIGIRR	NM_021805	single Ig IL-1R-related molecule
1555943_at	483.034	457.357	0.946841	0.00858955	MGC5352	CA307621	hypothetical protein MGC5352
222498_at	354.961	336.082	0.946814	0.00102897	AZI2	AI809206	5-azacytidine induced 2
231718_at	475.965	450.632	0.946777	0.0226531	SLU7	NM_006425	step II splicing factor SLU7
226173_at	441.377	417.822	0.946633	0.0361865	OATL1	AF196969	ornithine aminotransferase-like 1
237131_at	327.869	310.333	0.946513	0.0147368	FLJ36032	AV746331	hypothetical protein FLJ36032
205470_s_at	371.242	351.361	0.946446	0.036524	KLK11	NM_006853	kallikrein 11
1560964_at	318.325	301.276	0.946443	0.0232406	---	AF086565	Full length insert cDNA clone ZE16D09
213293_s_at	461.553	436.732	0.946224	0.0351576	TRIM22	AA083478	tripartite motif-containing 22
241737_x_at	356.149	336.976	0.946165	0.0254821	---	T89693	---
235753_at	964.033	912.024	0.946051	0.0102853	---	AI492051	---
218436_at	562.82	532.348	0.945859	0.0475608	SIL1	NM_022464	endoplasmic reticulum chaperone SIL1, homolog of yeast
206814_at	350.483	331.489	0.945807	0.0306348	NGFB	NM_002506	nerve growth factor, beta polypeptide
1559091_s_at	461.147	436.093	0.94567	0.0110592	FGD2	AA825628	FYVE, RhoGEF and PH domain containing 2
206873_at	513.595	485.661	0.945611	0.000770374	CA6	NM_001215	carbonic anhydrase VI
239061_at	788.326	745.314	0.945438	0.0211107	FLJ35107	AW303358	hypothetical protein FLJ35107
232077_s_at	309.13	292.262	0.945433	0.00562019	YPEL3	AU147979	yippee-like 3 (Drosophila)
229752_at	346.393	327.488	0.945424	0.000684802	ZNFN1A4	BF115531	zinc finger protein, subfamily 1A, 4 (Eos)
212144_at	744.952	704.256	0.945371	0.0350173	UNC84B	AL021707	unc-84 homolog B (C. elegans)
206668_s_at	309.89	292.9	0.945173	0.00550339	SCAMP1	NM_004866	secretory carrier membrane protein 1
213810_s_at	394.496	372.816	0.945045	0.0166161	---	AW007137	---
217324_at	661.655	625.292	0.945041	0.0350091	EPHB1	AL133099	EphB1
1562403_a_at	786.065	742.844	0.945017	0.0336834	SLC8A3	AK096553	solute carrier family 8 (sodium-calcium exchanger), member 3
1559889_at	864.702	817.042	0.944882	0.0417813	---	BC014362	Homo sapiens, clone IMAGE:3932221, mRNA
212431_at	1333.23	1259.74	0.944873	0.0426527	KIAA0194	D83778	KIAA0194 protein
220001_at	318.216	300.661	0.944834	0.0338449	PADI4	NM_012387	peptidyl arginine deiminase, type IV
225397_at	382.463	361.35	0.944796	0.0416499	MGC20481	AW575737	hypothetical protein MGC20481
232028_at	308.927	291.841	0.944692	0.0179862	---	AK026475	CDNA: FLJ22822 fis, clone KAIA3968
209034_at	3002.45	2836.21	0.944633	0.0375424	PNRC1	AF279899	proline-rich nuclear receptor coactivator 1
226629_at	397.917	375.839	0.944516	0.00822004	MGC34680	AI742770	hypothetical protein MGC34680
236497_at	325.287	307.226	0.944474	0.0428307	---	AI203293	---
235514_at	472.593	446.301	0.944366	0.0430043	FLJ25084	AI739528	hypothetical protein FLJ25084
230785_at	325.548	307.422	0.944322	0.0120558	---	AI634411	---
206429_at	389.678	367.939	0.944214	0.0317602	F2RL1	NM_005242	coagulation factor II (thrombin) receptor-like 1
224774_s_at	321.55	303.599	0.944173	0.0236211	NAV1	AK022622	neuron navigator 1
1566473_a_at	374.077	353.143	0.944041	0.0180871	---	AK098125	Similar to hypothetical protein FLJ20296
225821_s_at	353.805	333.975	0.943951	0.00193916	KIAA1327	AI744726	KIAA1327 protein
1569434_at	323.648	305.489	0.943894	0.0309203	C14orf105	BC028060	chromosome 14 open reading frame 105
213695_at	335.518	316.685	0.943868	0.0426851	PON3	L48516	paraoxonase 3
228794_at	9454.96	8924.01	0.943844	0.0147545	CMYA3	AA211780	cardiomyopathy associated 3
205641_s_at	327.161	308.762	0.943764	0.0195131	TRADD	NM_003789	TNFRSF1A-associated via death domain
221100_at	397.136	374.793	0.943738	0.00647189	C6orf15	NM_014070	chromosome 6 open reading frame 15
1555740_a_at	325.064	306.756	0.943681	0.035508	C21orf61	AF483549	chromosome 21 open reading frame 61
242129_at	514.092	485.13	0.943664	0.0308481	---	BF510861	---
201988_s_at	463.282	437.141	0.943574	0.0131691	CREBL2	BF438056	cAMP responsive element binding protein-like 2
202827_s_at	334.5	315.562	0.943387	0.0153372	MMP14	AU149305	matrix metalloproteinase 14 (membrane-inserted)
231719_at	372.726	351.591	0.943296	0.00730099	IFRG15	NM_022347	IFRG15 protein
207093_s_at	311.837	294.121	0.94319	0.0431879	OMG	NM_002544	oligodendrocyte myelin glycoprotein
203754_s_at	399.42	376.678	0.943063	0.0420818	BRF1	NM_001519	BRF1 homolog, subunit of RNA polymerase III transcription initiation factor IIIB (S. cerevisiae)
223195_s_at	552.151	520.689	0.943019	0.0354373	SESN2	BF131886	sestrin 2
216152_at	353.754	333.572	0.942949	0.00236374	---	AK021633	---
223522_at	395.86	373.215	0.942795	0.0311003	C9orf45	AF251293	chromosome 9 open reading frame 45
213520_at	422.232	398.072	0.942782	0.00943023	---	NM_004260	---
227093_at	416.912	392.996	0.942637	0.0358384	USP36	AU152298	Ubiquitin specific protease 36
201905_s_at	387.51	365.276	0.942625	0.00372991	CTDSPL	BF590317	CTD (carboxy-terminal domain, RNA polymerase II, polypeptide A) small phosphatase-like
236258_at	501.985	473.053	0.942365	0.011905	C20orf151	AI760126	chromosome 20 open reading frame 151
225264_at	419.286	395.109	0.942337	0.0284432	RARSL	AK023550	arginyl-tRNA synthetase-like
212505_s_at	602.155	567.366	0.942227	0.0219362	KIAA0892	AL110250	KIAA0892
220099_s_at	1082.82	1020.24	0.942202	0.0442075	LUC7L2	NM_016007	LUC7-like 2 (S. cerevisiae)
213512_at	348.125	328.003	0.9422	0.0466326	C14orf79	BF109941	chromosome 14 open reading frame 79
228346_at	318.945	300.508	0.942195	0.0241045	---	H47630	---
1558281_a_at	321.895	303.252	0.942086	0.0452759	MGC9712	BQ277407	hypothetical protein MGC9712
229576_s_at	337.88	318.272	0.94197	0.0237229	TBX3	N29712	T-box 3 (ulnar mammary syndrome)
236078_at	345.343	325.163	0.941566	0.00677656	---	AI333644	---
219150_s_at	320.814	301.993	0.941333	0.00756994	CENTA1	NM_006869	centaurin, alpha 1
53076_at	357.96	336.91	0.941196	0.0108816	B4GALT7	AI040029	xylosylprotein beta 1,4-galactosyltransferase, polypeptide 7 (galactosyltransferase I)
220128_s_at	504.623	474.933	0.941165	0.0463505	FLJ13955	NM_024759	hypothetical protein FLJ13955
57082_at	361.913	340.615	0.941151	0.0389526	ARH	AA169780	LDL receptor adaptor protein
233559_s_at	494.943	465.786	0.94109	0.032207	WDFY1	AK023415	WD repeat and FYVE domain containing 1
205986_at	678.375	638.384	0.941049	0.0183286	AATK	NM_004920	apoptosis-associated tyrosine kinase
235867_at	399.064	375.534	0.941038	0.0283335	GSTM3	AI459140	glutathione S-transferase M3 (brain)
204837_at	463.727	436.342	0.940946	0.0465764	MTMR9	AL080178	myotubularin related protein 9
236574_at	367.185	345.48	0.940888	0.0291492	---	AI304870	---
238627_at	503.992	474.195	0.940878	0.0201758	---	AW827150	---
1562449_s_at	414.038	389.538	0.940826	0.0189385	---	BC043255	Homo sapiens, clone IMAGE:5170410, mRNA
218266_s_at	329.507	309.996	0.940789	0.0441426	FREQ	NM_014286	frequenin homolog (Drosophila)
214057_at	688.847	648.021	0.940732	0.0122697	---	H71805	---
214599_at	418.444	393.624	0.940686	0.0131604	IVL	NM_005547	involucrin
216271_x_at	347.869	327.217	0.940634	0.00924525	---	AC004794	---
216267_s_at	348.047	327.376	0.940609	0.0220721	PL6	BF034906	placental protein 6
233795_at	634.27	596.512	0.940469	0.0359284	ODF3	AL133658	outer dense fiber of sperm tails 3
1555629_at	332.019	312.214	0.940349	0.0270272	HAVCR2	BC020843	hepatitis A virus cellular receptor 2
226723_at	435.625	409.62	0.940304	0.0370492	LOC374969	AI581511	hypothetical protein LOC374969
221626_at	395.675	371.979	0.940112	0.0214977	ZNF506	AL136548	zinc finger protein 506
212049_at	406.956	382.531	0.939981	0.0288109	WIRE	BG230612	WIRE protein
234896_at	555.282	521.847	0.939787	0.0388984	---	AJ012680	---
235872_at	528.476	496.64	0.939761	0.0489565	---	BE408975	---
221940_at	401.87	377.633	0.939688	0.0181417	C15orf19	AI571208	chromosome 15 open reading frame 19
240791_at	370.567	348.173	0.939569	0.0244221	---	AW134708	---
203296_s_at	6122.74	5752.05	0.939456	0.0215745	ATP1A2	NM_000702	ATPase, Na+/K+ transporting, alpha 2 (+) polypeptide
241795_at	325.955	306.199	0.939389	0.0218252	RHEB	AA678073	Ras homolog enriched in brain
235623_at	433.688	407.376	0.93933	0.0112797	---	BF526230	---
220074_at	376.821	353.95	0.939307	0.0374613	MUCDHL	NM_017717	mucin and cadherin-like
216939_s_at	326.399	306.579	0.939276	0.02682	HTR4 /// KIAA1985	Y08756	5-hydroxytryptamine (serotonin) receptor 4 /// KIAA1985 protein
65585_at	327.667	307.744	0.939199	0.0207561	MGC16279	AA527515	hypothetical protein MGC16279
243955_at	310.477	291.598	0.939195	0.027615	---	AI934364	---
220182_at	424.153	398.359	0.939186	0.0401097	SLC25A23	NM_024103	solute carrier family 25 (mitochondrial carrier; phosphate carrier), member 23
227684_at	434.794	408.341	0.939158	0.0166995	---	AI032786	---
231698_at	353.018	331.523	0.939111	0.0324067	UGP2	AV661152	UDP-glucose pyrophosphorylase 2
243123_at	540.665	507.716	0.939059	0.0307908	---	BF732649	---
218485_s_at	419.084	393.452	0.938839	0.0484219	SLC35C1	NM_018389	solute carrier family 35, member C1
229474_at	311.086	292.033	0.938754	0.0318571	MICAL3	BF055090	Flavoprotein oxidoreductase MICAL3
1564391_at	388.874	364.942	0.938458	0.0210196	ABCD3	AK024564	ATP-binding cassette, sub-family D (ALD), member 3
210920_x_at	383.885	360.154	0.938184	0.0193804	---	BC003528	---
231132_at	321.541	301.663	0.93818	0.0179052	---	AW002496	---
227890_at	358.327	336.094	0.937955	0.00243923	MGC99813	AL524643	similar to RIKEN cDNA A230078I05 gene
218078_s_at	365.555	342.853	0.937895	0.0147492	ZDHHC3	NM_016598	zinc finger, DHHC domain containing 3
1554208_at	669.462	627.845	0.937836	0.0321298	MGC40042	BC032248	similar to mouse meiosis defective 1 gene
231531_at	354.506	332.467	0.937831	0.0228588	MGC40179	BE551735	hypothetical protein MGC40179
211835_at	326.695	306.368	0.93778	0.0117599	---	AJ225093	---
38043_at	432.239	405.342	0.937772	0.0149584	FAM3A	X55448	family with sequence similarity 3, member A
227554_at	312.416	292.957	0.937718	0.000130324	---	AU145805	Hypothetical LOC402560
203204_s_at	390.772	366.43	0.937709	0.0262168	JMJD2A	BC002558	jumonji domain containing 2A
203128_at	336.88	315.875	0.937648	0.0421557	SPTLC2	NM_004863	serine palmitoyltransferase, long chain base subunit 2
1566696_at	342.534	321.159	0.937597	0.00886632	---	BC043200	Homo sapiens, clone IMAGE:5289071, mRNA
242081_at	354.573	332.422	0.937527	0.039676	CENTB1	AI808637	Centaurin, beta 1
1555523_a_at	717.109	672.262	0.937462	0.0122259	FYCO1	BC007218	FYVE and coiled-coil domain containing 1
214733_s_at	343.962	322.446	0.937445	0.0116116	DJ167A19.1	AL031427	hypothetical protein DJ167A19.1
231333_at	545.964	511.759	0.93735	0.0244472	---	AW303321	---
229854_at	2410.19	2259.12	0.937319	0.00175623	OBSCN	AW614056	obscurin, cytoskeletal calmodulin and titin-interacting RhoGEF
212929_s_at	472.901	443.163	0.937116	0.0259813	LOC387680 /// FLJ10824	W68158	similar to KIAA0592 protein /// hypothetical protein FLJ10824
209472_at	382.963	358.829	0.936979	0.0415378	KAT3	BC000819	kynurenine aminotransferase III
227695_at	356.431	333.943	0.936909	0.00401895	MGC15937	AW024547	similar to RIKEN cDNA 0610008P16 gene
1565680_at	639.93	599.501	0.936823	0.0479623	---	AK093390	---
1565587_at	353.746	331.396	0.936819	0.010722	SP140	BC033401	SP140 nuclear body protein
209304_x_at	467.991	438.423	0.936818	0.0193355	GADD45B	AF087853	Growth arrest and DNA-damage-inducible, beta
227560_at	500.654	469.018	0.936809	0.0315673	SFXN2	AL530504	sideroflexin 2
215701_at	884.127	828.213	0.936758	0.00371352	ZNF291	AL109666	Zinc finger protein 291
207311_at	852.771	798.726	0.936623	0.00743689	DOC2B	NM_003585	double C2-like domains, beta
230856_at	387.151	362.594	0.93657	0.0400073	---	AI073396	---
1563086_at	353.604	331.152	0.936506	0.0137713	---	BC039472	CDNA clone IMAGE:5526877, partial cds
206289_at	355.171	332.582	0.9364	0.0180677	HOXA4	NM_002141	homeo box A4
243074_at	370.229	346.678	0.936386	0.0397982	---	N48990	---
235110_at	596.888	558.917	0.936386	0.0344973	HRASLS3	BG539238	HRAS-like suppressor 3
208980_s_at	10889.3	10196	0.936332	0.0212782	UBC	M26880	ubiquitin C
219021_at	368.035	344.548	0.936184	0.00984029	RNF121	NM_018320	ring finger protein 121
222982_x_at	2713.45	2540.03	0.936089	0.0448522	SLC38A2	AF298897	solute carrier family 38, member 2
218227_at	710.717	665.286	0.936077	0.0116988	NUBP2	NM_012225	nucleotide binding protein 2 (MinD homolog, E. coli)
244317_at	389.904	364.954	0.936011	0.000478092	FLJ31340	BF035563	hypothetical protein FLJ31340
202807_s_at	675.29	631.955	0.935828	0.0292493	TOM1	NM_005488	target of myb1 (chicken)
236126_at	540.808	506.093	0.935809	0.00448006	---	AI188710	---
210819_x_at	340.557	318.667	0.935724	0.021859	DIO2	AB041844	Deiodinase, iodothyronine, type II
217099_s_at	577.901	540.754	0.935721	0.0266946	GEMIN4	AF258545	gem (nuclear organelle) associated protein 4
1569077_x_at	388.321	363.274	0.935498	0.0439055	FLJ16287	BE791720	FLJ16287 protein
1562091_at	330.482	309.161	0.935486	0.0123933	---	BC041963	Homo sapiens, clone IMAGE:5302310, mRNA
206611_at	458.87	429.176	0.935289	0.0008751	C2orf27	NM_013310	chromosome 2 open reading frame 27
236292_at	380.398	355.752	0.93521	0.000397193	---	AW196696	---
1558338_at	316.858	296.296	0.935107	0.0138049	SEMA6A	AB002453	Sema domain, transmembrane domain (TM), and cytoplasmic domain, (semaphorin) 6A
244756_at	728.094	680.831	0.935086	0.0290265	LOC338692	AI885453	hypothetical protein LOC338692
228921_at	330.579	309.116	0.935077	0.0175586	MGC26694	AW170609	hypothetical protein MGC26694
234552_at	348.653	326.002	0.935031	0.0259737	---	AK000090	CDNA FLJ20083 fis, clone COL03440
222567_s_at	343.239	320.885	0.934873	0.0243684	RKHD2	AW087789	ring finger and KH domain containing 2
217035_at	482.419	450.992	0.934856	0.015211	---	X95660	---
229343_at	351.777	328.857	0.934846	0.030572	---	AI218393	---
221968_s_at	366.44	342.485	0.934628	0.0184656	---	AW014373	---
225867_at	315.777	295.096	0.934506	0.02374	LOC114990	BE741869	vasorin
219144_at	3148.02	2941.68	0.934454	0.0319198	MGC1136	NM_024025	hypothetical protein MGC1136
224039_at	382.782	357.64	0.934319	0.0258156	DKFZP434J0113	AL136748	hypothetical protein DKFZp434J0113
235884_at	429.112	400.917	0.934294	0.0367435	---	AI922943	---
203950_s_at	331.205	309.442	0.934293	0.00620591	CLCN6	NM_001286	chloride channel 6
235860_at	344.359	321.729	0.934285	0.040185	---	AA719526	---
229826_at	439.635	410.719	0.934228	0.0263066	LOC440957	BF573638	Similar to CG32736-PA
225075_at	545.127	509.229	0.934148	0.0247795	PDRG1	AL031658	p53 and DNA damage regulated 1
243475_at	365.895	341.794	0.934132	0.0137363	CBL	AW502463	Cas-Br-M (murine) ecotropic retroviral transforming sequence
1568666_at	702.093	655.799	0.934063	0.0194737	---	BC033570	Similar to RIKEN cDNA 2310076L09
218985_at	470.22	439.194	0.934017	0.0191299	SLC2A8	NM_014580	solute carrier family 2, (facilitated glucose transporter) member 8
243355_at	390.63	364.828	0.933947	0.0115003	---	AI001788	---
238679_at	315.119	294.219	0.933677	0.010516	MESDC2	AI582909	mesoderm development candidate 2
226362_at	655.371	611.872	0.933628	0.0311274	LOC153561	AI198515	Hypothetical LOC389295
224059_s_at	342.404	319.663	0.933582	0.000341152	NUMBL	BC001794	numb homolog (Drosophila)-like
242743_at	353.379	329.904	0.933571	0.0447567	---	AA767714	---
206409_at	823.616	768.879	0.933541	0.016454	TIAM1	NM_003253	T-cell lymphoma invasion and metastasis 1
238150_at	342.877	320.064	0.933466	0.0478137	DKFZp547B139	BF434118	hypothetical protein DKFZp547B139
207819_s_at	310.863	290.1	0.933206	0.0278435	ABCB4	NM_000443	ATP-binding cassette, sub-family B (MDR/TAP), member 4
236587_at	329.208	307.098	0.93284	0.0266014	---	AI521902	---
231295_at	384.064	358.25	0.932789	0.00120643	ME3	BE326351	malic enzyme 3, NADP(+)-dependent, mitochondrial
223780_s_at	486.414	453.597	0.932534	0.0460456	THRAP1	AF151055	thyroid hormone receptor associated protein 1
1555032_at	390.604	364.248	0.932524	0.0424374	RGS12	AF464735	regulator of G-protein signalling 12
244252_at	339.136	316.244	0.9325	0.00680259	LOC399884	AA024953	hypothetical LOC399884
223425_at	436.016	406.568	0.932462	0.0230425	RAVER1	BC002848	RAVER1
1568596_a_at	368.367	343.363	0.932122	0.0410267	TROAP	AI199355	trophinin associated protein (tastin)
204193_at	452.727	421.995	0.932119	0.0459808	CHKB	NM_005198	choline kinase beta
207050_at	1101.92	1027.12	0.932116	0.0224464	CACNA2D1	NM_000722	calcium channel, voltage-dependent, alpha 2/delta subunit 1
213402_at	475.378	443.091	0.932082	0.0139012	LOC126208	AA029811	hypothetical protein LOC126208
234386_s_at	326.203	304.039	0.932055	0.0186965	---	AF017338	CDNA clone IMAGE:7262732, partial cds
215821_x_at	341.943	318.674	0.931952	0.00139228	PSG3	R32065	pregnancy specific beta-1-glycoprotein 3
211726_s_at	383.208	357.05	0.931741	0.000962785	FMO2	BC005894	flavin containing monooxygenase 2 /// flavin containing monooxygenase 2
206927_s_at	333.25	310.441	0.931556	0.025672	GUCY1A2	NM_000855	guanylate cyclase 1, soluble, alpha 2
204828_at	382.002	355.843	0.931522	0.0434862	RAD9A	NM_004584	RAD9 homolog A (S. pombe)
1563753_at	343.496	319.959	0.931479	0.0297126	LOC149684	AK055854	hypothetical protein LOC149684
205610_at	5369.31	5001.07	0.931418	0.038267	MYOM1	NM_003803	myomesin 1 (skelemin) 185kDa
233541_at	421.164	392.246	0.931336	0.0271194	---	AK026206	CDNA: FLJ22553 fis, clone HSI01074, highly similar to HSA132408 Homo sapiens mRNA for LIM domains containing protein 1
213523_at	325.527	303.166	0.93131	0.0152871	CCNE1	AI671049	cyclin E1
211038_s_at	356.994	332.447	0.93124	0.00584504	MGC12760	BC006312	hypothetical protein MGC12760 /// hypothetical protein MGC12760
223126_s_at	516.434	480.923	0.931239	0.042453	C1orf21	AI159874	chromosome 1 open reading frame 21
225891_at	426.736	397.34	0.931115	0.00437022	C9orf75	AI983261	chromosome 9 open reading frame 75
1557341_x_at	362.734	337.735	0.93108	0.032204	CLSTN1	AL523099	Calsyntenin 1
234186_at	316.202	294.402	0.931055	0.0297276	TARP	AK026401	T cell receptor gamma variable 9
210107_at	334.776	311.672	0.930987	0.0355143	CLCA1	AF127036	chloride channel, calcium activated, family member 1
1564816_at	515.932	480.319	0.930972	0.0374459	FLJ25976	AK098842	hypothetical protein FLJ25976
227294_at	336.49	313.263	0.930972	0.0154273	LOC115509	AI474448	Hypothetical protein BC014000
237826_at	347.605	323.61	0.930972	0.0157868	---	BE220308	---
227570_at	605.834	563.932	0.930835	0.0390282	FLJ90119	BE857226	hypothetical protein FLJ90119
240919_at	405.397	377.31	0.930718	0.0224741	---	AI829734	---
1556589_at	450.202	418.968	0.930621	0.0265708	---	T83966	CDNA FLJ25645 fis, clone SYN00113
201536_at	2749.58	2558.66	0.930563	0.0150528	DUSP3	AL048503	dual specificity phosphatase 3 (vaccinia virus phosphatase VH1-related)
1560492_at	315.232	293.302	0.930434	0.0484743	CRADD	BC014174	CASP2 and RIPK1 domain containing adaptor with death domain
222349_x_at	337.499	314.018	0.930427	0.00597776	RNF126P1	AW303476	ring finger protein 126 pseudogene 1
202687_s_at	456.764	424.942	0.930332	0.0311276	TNFSF10	U57059	tumor necrosis factor (ligand) superfamily, member 10 /// tumor necrosis factor (ligand) superfamily, member 10
239633_at	347.346	323.139	0.930307	0.0345126	---	AW296118	---
1560198_at	402.326	374.265	0.930253	0.0256857	C14orf70	AV701600	chromosome 14 open reading frame 70
223948_s_at	401.053	373.075	0.930238	0.0351276	TMPRSS3	AB038160	transmembrane protease, serine 3
238640_at	343.837	319.745	0.929932	0.015792	---	AA878325	---
211993_at	470.448	437.477	0.929917	0.00230888	PRKWNK1	AI768512	protein kinase, lysine deficient 1 /// protein kinase, lysine deficient 1
231882_at	360.571	335.249	0.929771	0.0219357	---	AL530703	Hypothetical gene supported by AK022914; AK095211; BC016035; BC041856; BX248778
208429_x_at	431.784	401.452	0.929751	0.0442752	HNF4A	NM_000457	hepatocyte nuclear factor 4, alpha
223525_at	656.924	610.748	0.929709	0.00576652	DLL4	AB036931	delta-like 4 (Drosophila)
1564660_at	316.964	294.64	0.929569	0.0024454	CHD5	AK094219	Chromodomain helicase DNA binding protein 5
1564237_at	366.07	340.259	0.929492	0.0216106	---	AK074438	Transcribed locus, weakly similar to NP_060313.2 breast carcinoma amplified sequence 4 [Homo sapiens]
223906_s_at	321.086	298.434	0.929452	0.036384	MGC4766	AY014285	testis-specific protein TES101RP
221115_s_at	330.395	307.014	0.929235	0.019107	LENEP	NM_018655	lens epithelial protein
1565882_at	348.728	323.968	0.928998	0.0388715	---	AK022126	---
228580_at	355.632	330.326	0.928841	0.00642566	HTRA3	AI828007	Serine protease HTRA3
225407_at	519.884	482.874	0.928812	0.00514987	MBP	N37023	Myelin basic protein
241478_at	316.668	294.119	0.928792	0.010929	FLJ23471	AI821474	MICAL-like 2
226737_at	563.39	523.193	0.928651	0.0191716	MGC26694	BG235908	hypothetical protein MGC26694
1556671_s_at	413.903	384.265	0.928392	0.0311196	---	AK098715	Transcribed locus, weakly similar to NP_082177.1 general transcription factor IIIC, polypeptide 2, beta [Mus musculus]
226216_at	580.925	539.324	0.928389	0.0159671	INSR	W84556	Insulin receptor
243435_at	415.319	385.546	0.928313	0.00798922	---	AI023707	---
228028_at	465.001	431.656	0.92829	0.0353364	LOC150946	AW139151	hypothetical protein LOC150946
200759_x_at	4698.18	4359.76	0.927968	0.00546742	NFE2L1	NM_003204	nuclear factor (erythroid-derived 2)-like 1
204294_at	399.662	370.731	0.927611	0.0380913	AMT	NM_000481	aminomethyltransferase (glycine cleavage system protein T)
216699_s_at	378.468	350.999	0.927422	0.00360522	KLK1	L10038	kallikrein 1, renal/pancreas/salivary
219246_s_at	571.455	529.87	0.927229	0.049569	FLJ13491	NM_024623	hypothetical protein FLJ13491
204996_s_at	489.017	453.389	0.927142	0.0484937	CDK5R1	NM_003885	cyclin-dependent kinase 5, regulatory subunit 1 (p35)
212717_at	610.97	566.359	0.926984	0.0121884	PLEKHM1	AB002354	pleckstrin homology domain containing, family M (with RUN domain) member 1
1564537_a_at	567.752	526.093	0.926624	0.0398013	ASB10	AK055536	ankyrin repeat and SOCS box-containing 10
244618_at	325.29	301.411	0.926593	0.00307502	---	W58255	---
208191_x_at	492.717	456.525	0.926546	0.0116172	PSG4	NM_002780	pregnancy specific beta-1-glycoprotein 4
200733_s_at	3441.3	3188.36	0.926498	0.0387879	PTP4A1	U48296	protein tyrosine phosphatase type IVA, member 1
232367_x_at	640.624	593.484	0.926415	0.0414879	ZNF598	BG341703	zinc finger protein 598
227465_at	765.121	708.581	0.926103	0.0208663	KIAA0892	AL514301	KIAA0892
225313_at	734.104	679.729	0.92593	0.039162	C20orf177	AI627538	chromosome 20 open reading frame 177
234956_at	566.734	524.551	0.925568	0.0149698	---	AK000175	---
244554_at	360.777	333.857	0.925384	0.0356532	---	AI351179	---
210275_s_at	3890.59	3599.58	0.925204	0.0260838	ZA20D2	AF062347	zinc finger, A20 domain containing 2
241602_at	363.097	335.918	0.925147	0.0272086	ZNF582	BG432829	zinc finger protein 582
212452_x_at	520.894	481.758	0.924867	0.0430861	MYST4	AF113514	MYST histone acetyltransferase (monocytic leukemia) 4
238607_at	401.828	371.414	0.924312	0.00294416	ZNF342	AA761573	zinc finger protein 342
228769_at	426.083	393.82	0.924279	0.0118424	HKR2	BE794668	GLI-Kruppel family member HKR2
220816_at	339.776	314.044	0.924268	0.029911	EDG7	NM_012152	endothelial differentiation, lysophosphatidic acid G-protein-coupled receptor, 7
221866_at	1177.62	1088.04	0.923933	0.0163837	TFEB	AL035588	transcription factor EB
1553279_at	676.463	624.999	0.923921	0.0386755	BTNL9	NM_152547	butyrophilin-like 9
218533_s_at	715.689	661.002	0.923589	0.0117963	UCKL1	NM_017859	uridine-cytidine kinase 1-like 1
1554245_x_at	381.889	352.614	0.923343	0.0394301	LOC51326	BC030570	ARF protein
212605_s_at	1168.98	1079.02	0.923044	0.0389443	NUDT3	AK025759	Nudix (nucleoside diphosphate linked moiety X)-type motif 3
214891_at	379.236	350.044	0.923023	0.0310093	FBXO21	U79257	F-box protein 21
212456_at	1044.03	963.431	0.9228	0.027303	KIAA0664	AB014564	KIAA0664 protein
210799_at	325.636	300.473	0.922727	0.0289478	HTR1B	M81590	5-hydroxytryptamine (serotonin) receptor 1B
1560435_at	314.839	290.472	0.922603	0.0112598	---	BU856247	CDNA FLJ36444 fis, clone THYMU2012902
1554911_at	403.67	372.425	0.922598	0.0113708	ABCC11	BC039085	ATP-binding cassette, sub-family C (CFTR/MRP), member 11
212597_s_at	333.142	307.308	0.922452	0.0422975	HMG2L1	AL079310	high-mobility group protein 2-like 1
237611_at	333.247	307.398	0.922434	0.0295034	---	BE463978	---
217688_at	338.448	312.171	0.92236	0.0004207	---	BE677757	---
1568789_at	462.096	426.142	0.922193	0.0494591	C6orf107	BC026164	chromosome 6 open reading frame 107
221857_s_at	361.647	333.367	0.921803	0.0103941	TJP4	AK024269	tight junction protein 4 (peripheral)
219114_at	649.219	598.352	0.921649	0.0496555	LOC51161	NM_016210	g20 protein
204940_at	4769.91	4395.55	0.921515	0.0402669	PLN	NM_002667	phospholamban
235739_at	424.57	391.205	0.921416	0.0421091	---	AA523939	---
202044_at	474.577	437.158	0.921154	0.0454448	GRLF1	AU159484	glucocorticoid receptor DNA binding factor 1
216705_s_at	314.277	289.45	0.921003	0.04344	ADA	X02189	adenosine deaminase
222269_at	558.303	514.18	0.920969	0.00362851	CXorf33	W87634	chromosome X open reading frame 33
1552311_a_at	601.995	554.399	0.920937	0.044893	MGC15631	NM_032753	hypothetical protein MGC15631
207494_s_at	587.332	540.823	0.920814	0.0413463	ZNF76	NM_003427	zinc finger protein 76 (expressed in testis)
1556265_at	395.544	364.178	0.920703	0.0343233	---	AK092524	Hypothetical gene supported by AK092524
1557117_at	594.743	547.562	0.920669	0.0434136	---	AW236954	Homo sapiens, clone IMAGE:4812643, mRNA, partial cds
204168_at	1073.32	988.163	0.920657	0.0247128	MGST2	NM_002413	microsomal glutathione S-transferase 2
206723_s_at	404.573	372.435	0.920562	0.0239054	EDG4	AF011466	endothelial differentiation, lysophosphatidic acid G-protein-coupled receptor, 4
219708_at	332.84	306.397	0.920552	0.0046317	NT5M	NM_020201	5',3'-nucleotidase, mitochondrial
232729_at	324.691	298.851	0.920418	0.0250209	---	AK023391	---
212705_x_at	875.199	805.461	0.920317	0.0439191	PNPLA2	BF570210	patatin-like phospholipase domain containing 2
212745_s_at	364.285	335.254	0.920307	0.0196673	BBS4	AI813772	Bardet-Biedl syndrome 4
221107_at	315.578	290.366	0.920107	0.0444529	CHRNA9	NM_017581	cholinergic receptor, nicotinic, alpha polypeptide 9
222757_s_at	315.564	290.347	0.920088	0.0429837	ZAK	AB030034	sterile alpha motif and leucine zipper containing kinase AZK
220006_at	329.103	302.782	0.920025	0.0484277	FLJ12057	NM_024768	hypothetical protein FLJ12057
240375_at	580.894	534.197	0.919611	0.0239151	---	AI798773	---
240443_at	608.915	559.858	0.919436	0.00693683	---	AA934493	---
1568675_at	444.832	408.942	0.919316	0.00491587	---	BF516446	---
201631_s_at	347.402	319.276	0.919037	0.0167864	IER3	NM_003897	immediate early response 3
1552942_at	506.952	465.878	0.91898	0.0368233	FLJ30430	NM_153009	hypothetical protein FLJ30430
226390_at	329.385	302.669	0.918893	0.0230234	STARD4	AA628398	START domain containing 4, sterol regulated
221756_at	512.073	470.405	0.918628	0.00720359	MGC17330	AL540260	HGFL gene /// HGFL gene
232526_at	384.445	353.142	0.918576	0.00610814	---	AK025304	---
214300_s_at	443.021	406.862	0.918382	0.013339	TOP3A	AI676092	topoisomerase (DNA) III alpha
222265_at	895.923	822.755	0.918332	0.00551397	CTEN	BE735851	C-terminal tensin-like
209751_s_at	412.452	378.613	0.917957	0.0471586	SEDLP /// SEDL	AF291676	spondyloepiphyseal dysplasia, late, pseudogene /// spondyloepiphyseal dysplasia, late
232110_at	450.058	413.1	0.917881	0.0198226	GALNT5	AK022198	UDP-N-acetyl-alpha-D-galactosamine:polypeptide N-acetylgalactosaminyltransferase 5 (GalNAc-T5)
224670_at	485.921	446.014	0.917874	0.00501812	C20orf35	AL530267	chromosome 20 open reading frame 35
206807_s_at	400.068	367.205	0.917857	0.0168275	ADD2	NM_017482	adducin 2 (beta)
226624_at	501.883	460.481	0.917508	0.0457679	---	AI697908	---
226533_at	515.867	473.279	0.917443	0.014247	HINT3	BF694956	histidine triad nucleotide binding protein 3
1563802_at	394.616	362.028	0.91742	0.0334813	LOC284551	AK093618	hypothetical protein LOC284551
219417_s_at	476.756	437.372	0.917392	0.00755517	FLJ20014	NM_017622	hypothetical protein FLJ20014
206176_at	367.05	336.683	0.917266	0.0220563	BMP6	NM_001718	bone morphogenetic protein 6
1560520_at	359.719	329.928	0.917181	0.0433982	---	BC039682	Hypothetical gene supported by BC039682
241957_x_at	423.311	388.199	0.917055	0.00606767	LIN7B	AI686521	lin-7 homolog B (C. elegans)
205972_at	397.006	364.065	0.917026	0.0318318	SLC38A3	NM_006841	solute carrier family 38, member 3
211531_x_at	1171.62	1074.28	0.916919	0.0421973	PRB1	K03205	proline-rich protein BstNI subfamily 1
1564536_at	474.605	435.148	0.916865	0.0203809	ASB10	AK055536	ankyrin repeat and SOCS box-containing 10
211457_at	347.725	318.806	0.916834	0.0047075	GABARAPL1	AF180519	GABA(A) receptor-associated protein like 1
1559205_s_at	531.116	486.905	0.916758	0.0384014	---	BC040914	Homo sapiens, clone IMAGE:5745627, mRNA
236441_at	484.688	444.306	0.916684	0.0429069	---	BF436900	---
208007_at	330.033	302.512	0.916611	0.0442852	---	NM_012122	---
212531_at	405.793	371.942	0.916582	0.0114891	LCN2	NM_005564	lipocalin 2 (oncogene 24p3)
219270_at	923.282	845.534	0.915792	0.0261351	MGC4504	NM_024111	hypothetical protein MGC4504
207919_at	448.06	410.164	0.915423	0.00041643	ART1	NM_004314	ADP-ribosyltransferase 1
229587_at	382.998	350.494	0.915133	0.0384847	UBA2	AA974493	SUMO-1 activating enzyme subunit 2
210477_x_at	378.073	345.963	0.915071	0.0356942	MAPK8	U34822	mitogen-activated protein kinase 8
204213_at	875.926	801.37	0.914884	0.0333837	PIGR	NM_002644	polymeric immunoglobulin receptor
205201_at	613.771	561.174	0.914306	0.0226292	GLI3	NM_000168	GLI-Kruppel family member GLI3 (Greig cephalopolysyndactyly syndrome)
1560115_a_at	498.548	455.794	0.914242	0.0211936	KIAA1217	AK091142	KIAA1217
200732_s_at	4134.48	3779.34	0.914102	0.0405006	PTP4A1	AL578310	protein tyrosine phosphatase type IVA, member 1
235741_at	316.722	289.479	0.913985	0.0499469	---	AA457033	---
216535_at	366.65	334.934	0.913498	0.0395687	IGSF4B	AL050219	immunoglobulin superfamily, member 4B
226485_at	560.184	511.708	0.913465	0.0215658	FLJ20674	BG547864	Hypothetical protein FLJ20674
221273_s_at	793.532	724.802	0.913386	0.0484744	DKFZP761H1710	NM_031297	hypothetical protein DKFZp761H1710 /// hypothetical protein DKFZp761H1710
1553366_s_at	3787.97	3459.53	0.913294	0.0372483	ANKRD23	NM_144994	ankyrin repeat domain 23
209671_x_at	638.596	583.211	0.91327	0.0401731	TRA@	M12423	T cell receptor alpha locus /// T cell receptor alpha locus
223659_at	385.944	352.418	0.913133	0.0202714	MSP	AB048797	mosaic serine protease
211350_s_at	391.839	357.594	0.912605	0.0379328	C6orf54	AB016900	chromosome 6 open reading frame 54
241166_at	429.183	391.588	0.912403	0.0101222	---	AV648428	---
221277_s_at	448.3	408.877	0.912062	0.0332409	PUS3	NM_031307	pseudouridylate synthase 3 /// pseudouridylate synthase 3
207065_at	409.613	373.463	0.911745	0.0499148	K6HF	NM_004693	cytokeratin type II
234250_at	653.04	595.183	0.911403	0.0380377	---	AK000417	Full-length cDNA clone CS0DJ014YP15 of T cells (Jurkat cell line) Cot 10-normalized of Homo sapiens (human)
212892_at	336.567	306.688	0.911222	0.0173376	ZNF282	AW130128	zinc finger protein 282
1558123_at	346.949	315.934	0.910608	0.0313057	FLJ35390	AK092709	hypothetical protein FLJ35390
217458_at	500.235	455.454	0.91048	0.0337993	---	AL137435	---
204424_s_at	321.449	292.611	0.910289	0.0495763	LMO3	AL050152	LIM domain only 3 (rhombotin-like 2)
210162_s_at	388.775	353.842	0.910147	0.00770793	NFATC1	U08015	nuclear factor of activated T-cells, cytoplasmic, calcineurin-dependent 1
219910_at	337.517	307.153	0.910038	0.0385469	HYPE	NM_007076	Huntingtin interacting protein E
200784_s_at	928.757	845.11	0.909936	0.0248455	LRP1	BF304759	low density lipoprotein-related protein 1 (alpha-2-macroglobulin receptor)
1555848_at	441.914	402.083	0.909867	0.0191634	RBM18	AI690004	RNA binding motif protein 18
229244_at	346.862	315.503	0.909593	0.00844764	---	AI400057	CDNA FLJ37216 fis, clone BRALZ2008696
235993_at	625.023	568.426	0.909448	0.0484215	---	T81639	---
242425_at	333.121	302.93	0.909371	0.0018784	---	BF823525	---
232232_s_at	345.476	314.072	0.9091	0.0421779	SLC22A16	AL050350	solute carrier family 22 (organic cation transporter), member 16
231884_at	334.844	304.374	0.909003	0.0336896	LIP8	AL137669	LYST-interacting protein LIP8
228898_s_at	395.173	359.177	0.908911	0.0248575	SMARCB1	AW135031	SWI/SNF related, matrix associated, actin dependent regulator of chromatin, subfamily b, member 1
203863_at	7679.2	6972.19	0.907932	0.0146233	ACTN2	W63731	actinin, alpha 2
203864_s_at	6263.19	5685.56	0.907773	0.0419575	ACTN2	NM_001103	actinin, alpha 2
220305_at	386.596	350.826	0.907475	0.0112572	MGC3260	NM_024030	Hypothetical protein MGC3260
223555_at	712.555	646.485	0.907276	0.0136115	FLJ20203	AL136565	hypothetical protein FLJ20203
222571_at	602.616	546.669	0.907161	0.0399699	SIAT7F	AK023900	sialytransferase 7 ((alpha-N-acetylneuraminyl 2,3-betagalactosyl-1,3)-N-acetyl galactosaminide alpha-2,6-sialytransferase) F
1562674_at	327.695	297.199	0.906936	0.034962	---	BC034299	Homo sapiens, clone IMAGE:5165176, mRNA
218361_at	420.493	381.329	0.906862	0.0013445	GPP34R	NM_018178	GPP34-related protein
1561263_at	430.536	390.434	0.906854	0.0262358	C1QTNF3	AK094895	C1q and tumor necrosis factor related protein 3
1559642_a_at	463.249	420.074	0.9068	0.00215987	C10orf56	BC029259	Chromosome 10 open reading frame 56
204153_s_at	595.813	540.149	0.906573	0.00900444	MFNG	NM_002405	manic fringe homolog (Drosophila)
1555790_a_at	415.755	376.615	0.905857	0.0103892	FLJ38482 /// LOC162967	BC036301	hypothetical protein FLJ38482 /// hypothetical protein LOC162967
218325_s_at	549.517	497.646	0.905606	0.00844664	DATF1	NM_022105	death associated transcription factor 1
231044_at	385.49	348.742	0.904672	0.0104889	---	AI652292	Similar to CG5435-PA
1570479_at	336.032	303.977	0.904608	0.0064612	---	BC017828	---
209992_at	560.566	506.964	0.904379	0.0205266	PFKFB2	AB044805	6-phosphofructo-2-kinase/fructose-2,6-biphosphatase 2
231457_at	398.707	360.173	0.903353	0.0443204	---	AA780280	---
214179_s_at	3108.34	2807.6	0.903247	0.0142438	NFE2L1	H93013	nuclear factor (erythroid-derived 2)-like 1
207811_at	355.008	320.519	0.902849	0.0458932	KRT12	NM_000223	keratin 12 (Meesmann corneal dystrophy)
226625_at	396.371	357.532	0.902014	0.00918574	---	AW193698	---
235313_at	10301.9	9292.11	0.901982	0.0248031	NRAP	AA195854	nebulin-related anchoring protein
244628_at	580.162	522.886	0.901277	0.0499904	---	W45463	---
205874_at	502.176	452.42	0.900919	0.0293431	ITPKA	NM_002220	inositol 1,4,5-trisphosphate 3-kinase A
228268_at	469.206	422.587	0.900642	0.0186574	FMO2	AI758223	Flavin containing monooxygenase 2
230710_at	385.355	346.899	0.900205	0.0196669	---	W05495	CDNA FLJ41489 fis, clone BRTHA2004582
223729_at	855.523	770.104	0.900155	0.00347435	CECR2	AF336133	cat eye syndrome chromosome region, candidate 2
209222_s_at	480.155	432.019	0.899748	0.027619	OSBPL2	BC000296	oxysterol binding protein-like 2
214009_at	643.954	578.645	0.898582	0.01376	MSL3L1	R10150	male-specific lethal 3-like 1 (Drosophila)
226982_at	434.234	389.979	0.898085	0.02843	ELL2	AI745624	Elongation factor, RNA polymerase II, 2
226495_at	853.301	764.895	0.896396	0.0106839	---	BE727883	LOC440752
205624_at	544.363	487.935	0.896342	0.0253289	CPA3	NM_001870	carboxypeptidase A3 (mast cell)
200800_s_at	2322.61	2081.15	0.896039	0.0228451	HSPA1A /// HSPA1B	NM_005345	heat shock 70kDa protein 1A /// heat shock 70kDa protein 1B
216760_at	481.5	430.989	0.895096	0.048046	---	AK025029	---
210778_s_at	472.376	422.49	0.894393	0.0368076	MXD4	BC002713	MAX dimerization protein 4
240198_at	947.529	846.389	0.893258	0.0123211	---	AA348683	---
222079_at	325.327	290.584	0.893205	0.00983719	---	BF739971	---
214828_s_at	434.425	387.977	0.893082	0.0223929	CGI-96 /// dJ222E13.2	AL157851	CGI-96 protein /// similar to CGI-96
222677_x_at	437.749	390.827	0.892809	0.0423597	---	NM_017900	---
226531_at	718.774	641.321	0.892242	0.0487467	FLJ14466	AL530596	hypothetical protein FLJ14466
238221_at	338.222	301.67	0.891931	0.0419731	---	R42863	---
1553715_s_at	1282.14	1143.12	0.891574	0.0457059	MGC15416	NM_032371	hypothetical protein MGC15416
203752_s_at	2128.66	1897.69	0.891496	0.0471123	JUND	NM_005354	jun D proto-oncogene
235939_at	923.341	822.768	0.891076	0.0244235	---	AI417657	CDNA FLJ36815 fis, clone ASTRO2003740
222961_at	407.641	363.236	0.891069	0.0113109	TDE2L	AF116607	tumor differentially expressed 2-like
244086_at	486.755	432.963	0.889488	0.0278678	---	AA872567	---
238741_at	571.068	507.699	0.889034	0.0127255	BJ-TSA-9	BE157240	hypothetical protein MGC14128
227326_at	707.11	627.56	0.887501	0.0282024	FLJ46603	BE966768	FLJ46603 protein
224323_s_at	543.095	481.903	0.887327	0.0332756	MRO	AB042647	maestro /// maestro
1559820_at	783.583	695.285	0.887316	0.0461178	APG10L	BC018651	APG10 autophagy 10-like (S. cerevisiae)
215540_at	412.048	364.722	0.885144	0.0451433	TRA@	AW950865	T cell receptor alpha locus /// T cell receptor alpha chain /// T cell receptor alpha-chain rearranged mRNA VJ-FC. /// T cell receptor alpha chain /// T cell receptor alpha chain /// J-alpha segment J-alpha W mRNA for J-alpha region of T-cell receptor /// T-cell antigen receptor alpha (TCRA)
226459_at	525.139	463.711	0.883025	0.032484	PIK3AP1	AW575754	phosphoinositide-3-kinase adaptor protein 1
217174_s_at	559.782	494.199	0.882841	0.00778648	APC2	AL078616	adenomatosis polyposis coli 2
239940_at	896.31	790.843	0.882332	0.0251771	---	BE674244	---
229699_at	428.538	378.106	0.882314	0.00287569	---	AW237752	CDNA FLJ45384 fis, clone BRHIP3021987
219069_at	909.05	800.795	0.880914	0.0126444	FGIF	NM_017704	fetal globin-inducing factor
211538_s_at	2672.6	2347.5	0.878359	0.0102396	HSPA2	U56725	heat shock 70kDa protein 2
237337_at	330.039	289.752	0.877931	0.0341837	---	AI539318	---
222954_at	2243.43	1969.1	0.877717	0.00193957	---	AF204674	---
220164_s_at	1709.82	1499.47	0.876973	0.00100318	FBXO40	NM_016298	F-box protein 40
229419_at	580.809	509.102	0.87654	0.0134614	---	BF222826	---
241197_at	392.235	343.32	0.875292	0.0222315	---	AW440117	---
234829_at	520.262	455.271	0.87508	0.001915	C20orf57	AK000652	chromosome 20 open reading frame 57
226055_at	854.6	745.399	0.872219	0.00745724	ARRDC2	AK000689	arrestin domain containing 2
221064_s_at	434.51	377.795	0.869475	0.025882	C16orf28	NM_023076	chromosome 16 open reading frame 28
226140_s_at	655.7	569.933	0.869199	0.0390205	OTUD1	AI934347	OTU domain containing 1
200730_s_at	1952.94	1696.99	0.868944	0.0419424	PTP4A1	BF576710	protein tyrosine phosphatase type IVA, member 1
227818_at	868.736	753.601	0.867468	0.00327085	DKFZP434L0117	AL133609	hypothetical protein DKFZp434L0117
207275_s_at	2285.12	1975.71	0.864599	0.0206695	ACSL1	NM_001995	acyl-CoA synthetase long-chain family member 1
205206_at	654.896	566.21	0.864581	0.0375664	KAL1	NM_000216	Kallmann syndrome 1 sequence
1553352_x_at	399.161	344.18	0.86226	0.0435503	ERVWE1	AF513360	endogenous retroviral family W, env(C7), member 1 (syncytin)
207119_at	329.124	282.94	0.859678	0.0171377	PRKG1	NM_006258	protein kinase, cGMP-dependent, type I
205945_at	374.321	321.686	0.859386	0.0437502	IL6R	NM_000565	interleukin 6 receptor /// interleukin 6 receptor
202590_s_at	1249.43	1073.41	0.859118	0.0218455	PDK2	AL574319	pyruvate dehydrogenase kinase, isoenzyme 2
1560689_s_at	355.803	304.499	0.855808	0.0373172	AKT2	AK098099	V-akt murine thymoma viral oncogene homolog 2
225906_at	2698.75	2306.82	0.854773	0.0176804	---	BG261385	Similar to RCC1-like G exchanging factor-like isoform 1; RCC1-like G exchanging factor-like
225551_at	630.21	537.903	0.853529	0.0218085	FLJ32001	AW291187	hypothetical protein FLJ32001
212430_at	1505.99	1282.64	0.851696	0.00722782	RNPC1	AL109955	RNA-binding region (RNP1, RRM) containing 1 /// RNA-binding region (RNP1, RRM) containing 1
204731_at	469.201	397.956	0.848158	0.0185102	TGFBR3	NM_003243	transforming growth factor, beta receptor III (betaglycan, 300kDa)
228488_at	392.665	332.585	0.846993	0.0205989	TBC1D16	W74640	TBC1 domain family, member 16
214627_at	552.563	465.697	0.842794	0.0401656	EPX	X14346	eosinophil peroxidase
210070_s_at	999.091	821.665	0.822413	0.00103498	CHKB /// CPT1B	U62733	choline kinase beta /// carnitine palmitoyltransferase 1B (muscle)
215001_s_at	4523.83	3711.09	0.820343	0.0413209	GLUL	AL161952	glutamate-ammonia ligase (glutamine synthase)
200648_s_at	2091.61	1682.02	0.804177	0.0414851	GLUL	NM_002065	glutamate-ammonia ligase (glutamine synthase)
221435_x_at	1133.65	903.063	0.796598	0.0340482	HT036	NM_031207	hypothetical protein HT036 /// hypothetical protein HT036
223769_x_at	1115.96	888.667	0.796326	0.0410063	HT036	AF284750	hypothetical protein HT036
218869_at	677.174	527.617	0.779145	0.00159888	MLYCD	NM_012213	malonyl-CoA decarboxylase
210119_at	379.862	295.732	0.778525	0.0242943	KCNJ15	U73191	potassium inwardly-rectifying channel, subfamily J, member 15
236972_at	1657.4	1283.03	0.774125	0.00241195	RNF28	AI351421	ring finger protein 28
203665_at	467.116	359.615	0.769862	0.0135234	HMOX1	NM_002133	heme oxygenase (decycling) 1
225803_at	3597.66	2755.28	0.765852	0.00141826	FBXO32	AW006123	F-box protein 32
225801_at	472.973	360.755	0.762739	0.0131386	FBXO32	AW518714	F-box protein 32
